# Supplementary material
Source: publisher figshare collection journal article supplement (https://springernature.figshare.com/ndownloader/files/12998375)
Supplement: Supplementary file 1 [file 12998375]

Archive with 30 entries (30 files):
- CytoscapeSession-2018_09_09-12_11/3.0.0.version
- CytoscapeSession-2018_09_09-12_11/networks/1818-Extensive+network.xgmml
- CytoscapeSession-2018_09_09-12_11/views/1834-2721-Extensive+network.xgmml
- CytoscapeSession-2018_09_09-12_11/tables/1818-Extensive+network/HIDDEN-org.cytoscape.model.CyNetwork-1818+hidden+network.cytable
- CytoscapeSession-2018_09_09-12_11/tables/1834-Extensive+network/HIDDEN-org.cytoscape.model.CyNetwork-1834+hidden+network.cytable
- CytoscapeSession-2018_09_09-12_11/tables/1818-Extensive+network/LOCAL_ATTRS-org.cytoscape.model.CyEdge-1818+default+edge.cytable
- CytoscapeSession-2018_09_09-12_11/tables/1834-Extensive+network/LOCAL_ATTRS-org.cytoscape.model.CyNode-Extensive+network+default+node.cytable
- CytoscapeSession-2018_09_09-12_11/tables/1834-Extensive+network/LOCAL_ATTRS-org.cytoscape.model.CyNetwork-Extensive+network+default+network.cytable
- CytoscapeSession-2018_09_09-12_11/tables/1818-Extensive+network/SHARED_ATTRS-org.cytoscape.model.CyNode-1818+shared+node.cytable
- CytoscapeSession-2018_09_09-12_11/tables/1818-Extensive+network/SHARED_ATTRS-org.cytoscape.model.CyNetwork-1818+shared+network.cytable
- CytoscapeSession-2018_09_09-12_11/tables/1818-Extensive+network/HIDDEN-org.cytoscape.model.CyNode-1818+hidden+node.cytable
- CytoscapeSession-2018_09_09-12_11/tables/1834-Extensive+network/LOCAL_ATTRS-org.cytoscape.model.CyEdge-Extensive+network+default+edge.cytable
- CytoscapeSession-2018_09_09-12_11/tables/1818-Extensive+network/LOCAL_ATTRS-org.cytoscape.model.CyNode-1818+default+node.cytable
- CytoscapeSession-2018_09_09-12_11/tables/1818-Extensive+network/LOCAL_ATTRS-org.cytoscape.model.CyNetwork-1818+default+network.cytable
- CytoscapeSession-2018_09_09-12_11/tables/1834-Extensive+network/HIDDEN-org.cytoscape.model.CyNode-1834+hidden+node.cytable
- CytoscapeSession-2018_09_09-12_11/tables/1834-Extensive+network/HIDDEN-org.cytoscape.model.CyEdge-1834+hidden+edge.cytable
- CytoscapeSession-2018_09_09-12_11/tables/1818-Extensive+network/HIDDEN-org.cytoscape.model.CyEdge-1818+hidden+edge.cytable
- CytoscapeSession-2018_09_09-12_11/tables/1818-Extensive+network/SHARED_ATTRS-org.cytoscape.model.CyEdge-1818+shared+edge.cytable
- CytoscapeSession-2018_09_09-12_11/tables/cytables.xml
- CytoscapeSession-2018_09_09-12_11/session_vizmap.xml
- CytoscapeSession-2018_09_09-12_11/properties/session_bookmarks.xml
- CytoscapeSession-2018_09_09-12_11/apps/org.cytoscape.ding.customgraphicsmgr/image_metadata.props
- CytoscapeSession-2018_09_09-12_11/apps/org.cytoscape.swing-application/session_state.xml
- CytoscapeSession-2018_09_09-12_11/apps/org.cytoscape.swing-application/network_list.xml
- CytoscapeSession-2018_09_09-12_11/apps/org.cytoscape.filter/filters.json
- CytoscapeSession-2018_09_09-12_11/apps/org.cytoscape.filter/filterChains.json
- CytoscapeSession-2018_09_09-12_11/apps/org.cytoscape.browser/NetworkTable.props
- CytoscapeSession-2018_09_09-12_11/apps/org.cytoscape.browser/EdgeTable.props
- CytoscapeSession-2018_09_09-12_11/apps/org.cytoscape.browser/NodeTable.props
- CytoscapeSession-2018_09_09-12_11/apps/org.cytoscape.browser/UnassignedTables.props
