# Supplementary material
Source: publisher figshare collection journal article supplement (https://springernature.figshare.com/ndownloader/files/12998375)
Supplement: Supplementary file 1 [file 12998375 › CytoscapeSession-2018_09_09-12_11/apps/org.cytoscape.browser/NetworkTable.props]

Extensive network default network	0	SUID	false
Extensive network default network	1	selected	false
Extensive network default network	2	shared name	true
Extensive network default network	3	name	true
Extensive network default network	4	__Annotations	true
