# Supplementary material
Source: publisher figshare collection journal article supplement (https://springernature.figshare.com/ndownloader/files/12998375)
Supplement: Supplementary file 1 [file 12998375 › CytoscapeSession-2018_09_09-12_11/apps/org.cytoscape.browser/NodeTable.props]

Extensive network default node	0	SUID	false
Extensive network default node	1	selected	false
Extensive network default node	2	shared name	true
Extensive network default node	3	name	true
Extensive network default node	4	PROTEIN NAME	true
Extensive network default node	5	Node code	true
