# Supplementary material
Source: publisher figshare collection journal article supplement (https://springernature.figshare.com/ndownloader/files/12998375)
Supplement: Supplementary file 1 [file 12998375 › CytoscapeSession-2018_09_09-12_11/networks/1818-Extensive+network.xgmml]

<?xml version="1.0" encoding="UTF-8" standalone="yes"?>
<graph id="1818" label="Extensive network" cy:view="0" cy:registered="0" cy:documentVersion="3.0" xmlns:dc="http://purl.org/dc/elements/1.1/" xmlns:xlink="http://www.w3.org/1999/xlink" xmlns:rdf="http://www.w3.org/1999/02/22-rdf-syntax-ns#" xmlns:cy="http://www.cytoscape.org" xmlns="http://www.cs.rpi.edu/XGMML">
  <att>
    <graph id="1834" label="Extensive network" cy:registered="1">
      <node id="2159" label="SHARPIN"/>
      <node id="2158" label="GDI1"/>
      <node id="2157" label="GOLGA3"/>
      <node id="2156" label="DNAH8"/>
      <node id="2155" label="TBK1"/>
      <node id="2154" label="HM13"/>
      <node id="2153" label="NBR1"/>
      <node id="2152" label="SEMA4G"/>
      <node id="2151" label="LDOC1L"/>
      <node id="2150" label="OPTN"/>
      <node id="2149" label="TRO"/>
      <node id="2148" label="MKRN2"/>
      <node id="2147" label="KIAA1671"/>
      <node id="2146" label="MKRN4P"/>
      <node id="2145" label="ULK3"/>
      <node id="2144" label="PHB2"/>
      <node id="2143" label="CCDC50"/>
      <node id="2142" label="ROR1"/>
      <node id="2141" label="KIF5C"/>
      <node id="2140" label="RBM4"/>
      <node id="2139" label="IKBKG"/>
      <node id="2138" label="CHUK"/>
      <node id="2137" label="GOLPH3"/>
      <node id="2136" label="NF2"/>
      <node id="2135" label="CAPN1"/>
      <node id="2134" label="TNRC6B"/>
      <node id="2133" label="ALMS1"/>
      <node id="2132" label="TNRC6A"/>
      <node id="2131" label="OXSR1"/>
      <node id="2130" label="USP54"/>
      <node id="2129" label="MPP5"/>
      <node id="2128" label="USP25"/>
      <node id="2127" label="RNF31"/>
      <node id="2126" label="CCDC14"/>
      <node id="2125" label="CSNK1D"/>
      <node id="2124" label="DTNA"/>
      <node id="2123" label="CNOT1"/>
      <node id="2122" label="YTHDF1"/>
      <node id="2121" label="TXLNA"/>
      <node id="2120" label="TXLNG"/>
      <node id="2119" label="CDK4"/>
      <node id="2118" label="CEP135"/>
      <node id="2117" label="IKBKB"/>
      <node id="2116" label="PICK1"/>
      <node id="2115" label="GIGYF2"/>
      <node id="2114" label="KIF7"/>
      <node id="2113" label="IQGAP3"/>
      <node id="2112" label="CCDC138"/>
      <node id="2111" label="NCAPG2"/>
      <node id="2110" label="PFDN5"/>
      <node id="2109" label="OBSL1"/>
      <node id="2108" label="SLC7A11"/>
      <node id="2107" label="KIF2C"/>
      <node id="2106" label="HSPA2"/>
      <node id="2105" label="FHL1"/>
      <node id="2104" label="CDC6"/>
      <node id="2103" label="MYH11"/>
      <node id="2102" label="TCEB1"/>
      <node id="2101" label="MOXD1"/>
      <node id="2100" label="TROAP"/>
      <node id="2099" label="HPRT1"/>
      <node id="2098" label="PJA2"/>
      <node id="2097" label="DYRK1A"/>
      <node id="2096" label="STAU2"/>
      <node id="2095" label="FREM2"/>
      <node id="2094" label="TRAF1"/>
      <node id="2093" label="LGR4"/>
      <node id="2092" label="ULBP3"/>
      <node id="2091" label="CD82"/>
      <node id="2090" label="GALNT1"/>
      <node id="2089" label="KHNYN"/>
      <node id="2088" label="LRRC69"/>
      <node id="2087" label="NCS1"/>
      <node id="2086" label="SEPSECS"/>
      <node id="2085" label="MAP3K7"/>
      <node id="2084" label="CHST12"/>
      <node id="2083" label="TAB2"/>
      <node id="2082" label="THAP4"/>
      <node id="2081" label="F10"/>
      <node id="2080" label="LNX2"/>
      <node id="2079" label="AMOT"/>
      <node id="2078" label="RADIL"/>
      <node id="2077" label="YLPM1"/>
      <node id="2076" label="AMOTL1"/>
      <node id="2075" label="EPB41L4B"/>
      <node id="2074" label="TRIM25"/>
      <node id="2073" label="GOLGA7B"/>
      <node id="2072" label="PRRC2A"/>
      <node id="2071" label="CKMT1A"/>
      <node id="2070" label="PRDX4"/>
      <node id="2069" label="NCKAP5L"/>
      <node id="2068" label="DYNC2H1"/>
      <node id="2067" label="CEP164"/>
      <node id="2066" label="RAB11B"/>
      <node id="2065" label="HBE1"/>
      <node id="2064" label="MBTPS1"/>
      <node id="2063" label="OIT3"/>
      <node id="2062" label="JCHAIN"/>
      <node id="2061" label="TAX1BP1"/>
      <node id="2060" label="NPEPPSL1"/>
      <node id="2059" label="AZI2"/>
      <node id="2058" label="PRSS3"/>
      <node id="2057" label="ART4"/>
      <node id="2056" label="RFC4"/>
      <node id="2055" label="ADSS"/>
      <node id="2054" label="PCSK5"/>
      <node id="2053" label="CPS1"/>
      <node id="2052" label="CAMK2B"/>
      <node id="2051" label="NOL6"/>
      <node id="2050" label="HSPA13"/>
      <node id="2049" label="MRC2"/>
      <node id="2048" label="PPT1"/>
      <node id="2047" label="IDE"/>
      <node id="2046" label="SCPEP1"/>
      <node id="2045" label="ACTG1"/>
      <node id="2044" label="ZFAND6"/>
      <node id="2043" label="CEP131"/>
      <node id="2042" label="ARG1"/>
      <node id="2041" label="CKAP2"/>
      <node id="2040" label="MAVS"/>
      <node id="2039" label="ATP6AP2"/>
      <node id="2038" label="DHFR"/>
      <node id="2037" label="RTN3"/>
      <node id="2036" label="PODXL2"/>
      <node id="2035" label="TAB1"/>
      <node id="2034" label="EMILIN2"/>
      <node id="2033" label="BAG4"/>
      <node id="2032" label="SPOCK3"/>
      <node id="2031" label="SULF2"/>
      <node id="2030" label="SLC26A2"/>
      <node id="2029" label="SPATA2L"/>
      <node id="2028" label="C1QTNF3"/>
      <node id="2027" label="S1PR2"/>
      <node id="2026" label="PTX3"/>
      <node id="2025" label="DLD"/>
      <node id="2024" label="C14orf80"/>
      <node id="2023" label="IGHA1"/>
      <node id="2022" label="SKA1"/>
      <node id="2021" label="RNF41"/>
      <node id="2020" label="PREP"/>
      <node id="2019" label="EFNA5"/>
      <node id="2018" label="EIF3K"/>
      <node id="2017" label="FAM20C"/>
      <node id="2016" label="NAA50"/>
      <node id="2015" label="TRMT6"/>
      <node id="2014" label="FZD7"/>
      <node id="2013" label="TMEM178B"/>
      <node id="2012" label="RAB9A"/>
      <node id="2011" label="TNFRSF1A"/>
      <node id="2010" label="PTBP2"/>
      <node id="2009" label="TNF"/>
      <node id="2008" label="COCH"/>
      <node id="2007" label="HIST3H2BB"/>
      <node id="2006" label="SET"/>
      <node id="2005" label="SMOC1"/>
      <node id="2004" label="SDCCAG3"/>
      <node id="2003" label="NID2"/>
      <node id="2002" label="FUBP3"/>
      <node id="2001" label="VPS37A"/>
      <node id="2000" label="ZCCHC3"/>
      <node id="1999" label="LAMA4"/>
      <node id="1998" label="MYCBPAP"/>
      <node id="1997" label="AFM"/>
      <node id="1996" label="CYLD"/>
      <node id="1995" label="KRT80"/>
      <node id="1994" label="EPHA5"/>
      <node id="1993" label="CEP85"/>
      <node id="1992" label="SPR"/>
      <node id="1991" label="ORAI1"/>
      <node id="1990" label="YTHDF3"/>
      <node id="1989" label="G3BP1"/>
      <node id="1988" label="STAT1"/>
      <node id="1987" label="CALCOCO2"/>
      <node id="1986" label="HABP2"/>
      <node id="1985" label="TTR"/>
      <node id="1984" label="RCC2"/>
      <node id="1983" label="PLOD1"/>
      <node id="1982" label="THOC2"/>
      <node id="1981" label="AKR7A2"/>
      <node id="1980" label="HNRNPCL2"/>
      <node id="1979" label="ANTXR1"/>
      <node id="1978" label="CHPF"/>
      <node id="1977" label="COASY"/>
      <node id="1976" label="DUS3L"/>
      <node id="1975" label="KLKB1"/>
      <node id="1974" label="TNFAIP3"/>
      <node id="1973" label="TRAF2"/>
      <node id="1972" label="NLGN1"/>
      <node id="1971" label="PLEKHB2"/>
      <node id="1970" label="NUP85"/>
      <node id="1969" label="C3orf58"/>
      <node id="1968" label="OGN"/>
      <node id="1967" label="TRADD"/>
      <node id="1966" label="FADD"/>
      <node id="1965" label="SRP19"/>
      <node id="1964" label="RIPK1"/>
      <node id="1963" label="HAPLN3"/>
      <node id="1962" label="TRAF3"/>
      <node id="1961" label="HERC4"/>
      <node id="1960" label="CCAR2"/>
      <node id="1959" label="PDPN"/>
      <node id="1958" label="CASP8"/>
      <node id="1957" label="RANBP2"/>
      <node id="1956" label="FAM188A"/>
      <node id="1955" label="DRG1"/>
      <node id="1954" label="TNIP1"/>
      <node id="1953" label="RBP4"/>
      <node id="1952" label="RNF115"/>
      <node id="1951" label="FAM83H"/>
      <node id="1950" label="PRPF4"/>
      <node id="1949" label="PCOLCE2"/>
      <node id="1948" label="POLR1A"/>
      <node id="1947" label="MPHOSPH9"/>
      <node id="1946" label="RRP9"/>
      <node id="1945" label="NUP43"/>
      <node id="1944" label="DENND5A"/>
      <node id="1943" label="TRIP6"/>
      <node id="1942" label="TENM3"/>
      <node id="1941" label="EIF3C"/>
      <node id="1940" label="DNAAF1"/>
      <node id="1939" label="UBE2V2"/>
      <node id="1938" label="NUPL2"/>
      <node id="1937" label="CSNK1A1"/>
      <node id="1936" label="RHOQ"/>
      <node id="1935" label="NDNF"/>
      <node id="1934" label="BAIAP2L1"/>
      <node id="1933" label="ROBO2"/>
      <node id="1932" label="TANK"/>
      <node id="1931" label="GPSM1"/>
      <node id="1930" label="TNIP2"/>
      <node id="1929" label="PFDN4"/>
      <node id="1928" label="GSK3A"/>
      <node id="1927" label="UTP6"/>
      <node id="1926" label="IVL"/>
      <node id="1925" label="HEATR1"/>
      <node id="1924" label="GSK3B"/>
      <node id="1923" label="SDK2"/>
      <node id="1922" label="BIRC2"/>
      <node id="1921" label="MLF1"/>
      <node id="1920" label="CEP95"/>
      <node id="1919" label="PRIM1"/>
      <node id="1918" label="CNOT10"/>
      <node id="1917" label="TBC1D31"/>
      <node id="1916" label="KRT79"/>
      <node id="1915" label="TLDC1"/>
      <node id="1914" label="PKN2"/>
      <node id="1913" label="EPHB4"/>
      <node id="1912" label="ATP5B"/>
      <node id="1911" label="CACNA2D2"/>
      <node id="1910" label="EIF4G2"/>
      <node id="1909" label="ZFAND2B"/>
      <node id="1908" label="DNAJB4"/>
      <node id="1907" label="ANAPC7"/>
      <node id="1906" label="TELO2"/>
      <node id="1905" label="ANXA4"/>
      <node id="1904" label="ZNF598"/>
      <node id="1903" label="ATP5A1"/>
      <node id="1902" label="UEVLD"/>
      <node id="1901" label="CNOT3"/>
      <node id="1900" label="SASS6"/>
      <node id="1899" label="CNTFR"/>
      <node id="1898" label="AHNAK"/>
      <node id="1897" label="EPS8"/>
      <node id="1896" label="IGHG1"/>
      <node id="1895" label="ERO1A"/>
      <node id="1894" label="IGKC"/>
      <node id="1893" label="HAX1"/>
      <node id="1892" label="RQCD1"/>
      <node id="1891" label="HIST2H3A"/>
      <node id="1890" label="RFC3"/>
      <node id="1889" label="IQCB1"/>
      <node id="1888" label="NOC4L"/>
      <node id="1887" label="MDH2"/>
      <node id="1886" label="PARVA"/>
      <node id="1885" label="NEK2"/>
      <node id="1884" label="SDCBP2"/>
      <node id="1883" label="OFD1"/>
      <node id="1882" label="NTPCR"/>
      <node id="1881" label="OTUD7B"/>
      <node id="1880" label="CCDC112"/>
      <node id="1879" label="PLEC"/>
      <node id="1878" label="CALML3"/>
      <node id="1877" label="PPP2R5D"/>
      <node id="1876" label="CCDC77"/>
      <node id="1875" label="SAPCD2"/>
      <node id="1874" label="KRT15"/>
      <node id="1873" label="SERPINB5"/>
      <node id="1872" label="MIB1"/>
      <node id="1871" label="SH3RF1"/>
      <node id="1870" label="PDPK1"/>
      <node id="1869" label="SNAP47"/>
      <node id="1868" label="PELI1"/>
      <node id="1867" label="SPRR1B"/>
      <node id="1866" label="SERPINB4"/>
      <node id="1865" label="TRAF4"/>
      <node id="1864" label="SSNA1"/>
      <node id="1863" label="UBASH3B"/>
      <node id="1862" label="STK10"/>
      <node id="1861" label="CETN3"/>
      <node id="1860" label="TRAF5"/>
      <node id="1859" label="INTS7"/>
      <node id="1858" label="YOD1"/>
      <node id="1857" label="KIF14"/>
      <node id="1856" label="AP2A1"/>
      <node id="1855" label="PAFAH1B1"/>
      <node id="1854" label="C1orf122"/>
      <node id="1853" label="PSMB3"/>
      <node id="1852" label="VPS37D"/>
      <node id="1851" label="RBCK1"/>
      <node id="1850" label="CPVL"/>
      <node id="1849" label="UMAD1"/>
      <node id="1848" label="CAPN15"/>
      <node id="1847" label="MFI2"/>
      <node id="1846" label="MSTO1"/>
      <node id="1845" label="AP2A2"/>
      <node id="1844" label="REEP5"/>
      <edge id="2720" label="SHARPIN (pp) ZCCHC3" source="2159" target="2000" cy:directed="1"/>
      <edge id="2719" label="SHARPIN (pp) DNAJB4" source="2159" target="1908" cy:directed="1"/>
      <edge id="2718" label="SHARPIN (pp) UEVLD" source="2159" target="1902" cy:directed="1"/>
      <edge id="2717" label="SHARPIN (pp) S1PR2" source="2159" target="2027" cy:directed="1"/>
      <edge id="2716" label="SHARPIN (pp) TNFAIP3" source="2159" target="1974" cy:directed="1"/>
      <edge id="2715" label="SHARPIN (pp) UMAD1" source="2159" target="1849" cy:directed="1"/>
      <edge id="2714" label="SHARPIN (pp) HPRT1" source="2159" target="2099" cy:directed="1"/>
      <edge id="2713" label="SHARPIN (pp) SEMA4G" source="2159" target="2152" cy:directed="1"/>
      <edge id="2712" label="SHARPIN (pp) MOXD1" source="2159" target="2101" cy:directed="1"/>
      <edge id="2711" label="SHARPIN (pp) DHFR" source="2159" target="2038" cy:directed="1"/>
      <edge id="2710" label="SHARPIN (pp) ULBP3" source="2159" target="2092" cy:directed="1"/>
      <edge id="2709" label="SHARPIN (pp) RBCK1" source="2159" target="1851" cy:directed="1"/>
      <edge id="2708" label="SHARPIN (pp) PDPN" source="2159" target="1959" cy:directed="1"/>
      <edge id="2707" label="SHARPIN (pp) PHB2" source="2159" target="2144" cy:directed="1"/>
      <edge id="2706" label="SHARPIN (pp) MKRN4P" source="2159" target="2146" cy:directed="1"/>
      <edge id="2705" label="SHARPIN (pp) MKRN2" source="2159" target="2148" cy:directed="1"/>
      <edge id="2704" label="SHARPIN (pp) IKBKG" source="2159" target="2139" cy:directed="1"/>
      <edge id="2703" label="SHARPIN (pp) LDOC1L" source="2159" target="2151" cy:directed="1"/>
      <edge id="2702" label="SHARPIN (pp) VPS37D" source="2159" target="1852" cy:directed="1"/>
      <edge id="2701" label="SHARPIN (pp) TLDC1" source="2159" target="1915" cy:directed="1"/>
      <edge id="2700" label="SHARPIN (pp) ORAI1" source="2159" target="1991" cy:directed="1"/>
      <edge id="2699" label="SHARPIN (pp) TNF" source="2159" target="2009" cy:directed="1"/>
      <edge id="2698" label="SHARPIN (pp) FZD7" source="2159" target="2014" cy:directed="1"/>
      <edge id="2697" label="SHARPIN (pp) RAB9A" source="2159" target="2012" cy:directed="1"/>
      <edge id="2696" label="SHARPIN (pp) TAB1" source="2159" target="2035" cy:directed="1"/>
      <edge id="2695" label="SHARPIN (pp) TRAF3" source="2159" target="1962" cy:directed="1"/>
      <edge id="2694" label="SHARPIN (pp) ULK3" source="2159" target="2145" cy:directed="1"/>
      <edge id="2693" label="SHARPIN (pp) TENM3" source="2159" target="1942" cy:directed="1"/>
      <edge id="2692" label="SHARPIN (pp) NCS1" source="2159" target="2087" cy:directed="1"/>
      <edge id="2691" label="SHARPIN (pp) TAB2" source="2159" target="2083" cy:directed="1"/>
      <edge id="2690" label="SHARPIN (pp) MAP3K7" source="2159" target="2085" cy:directed="1"/>
      <edge id="2689" label="SHARPIN (pp) RNF31" source="2159" target="2127" cy:directed="1"/>
      <edge id="2688" label="SHARPIN (pp) TNIP1" source="2159" target="1954" cy:directed="1"/>
      <edge id="2687" label="SHARPIN (pp) TNIP2" source="2159" target="1930" cy:directed="1"/>
      <edge id="2686" label="SHARPIN (pp) GDI1" source="2159" target="2158" cy:directed="1"/>
      <edge id="2685" label="IKBKG (pp) TRADD" source="2139" target="1967" cy:directed="1"/>
      <edge id="2684" label="IKBKG (pp) TAB1" source="2139" target="2035" cy:directed="1"/>
      <edge id="2683" label="IKBKG (pp) RADIL" source="2139" target="2078" cy:directed="1"/>
      <edge id="2682" label="IKBKG (pp) LNX2" source="2139" target="2080" cy:directed="1"/>
      <edge id="2681" label="IKBKG (pp) F10" source="2139" target="2081" cy:directed="1"/>
      <edge id="2680" label="IKBKG (pp) RIPK1" source="2139" target="1964" cy:directed="1"/>
      <edge id="2679" label="IKBKG (pp) AMOTL1" source="2139" target="2076" cy:directed="1"/>
      <edge id="2678" label="IKBKG (pp) TNIP1" source="2139" target="1954" cy:directed="1"/>
      <edge id="2677" label="IKBKG (pp) CDK4" source="2139" target="2119" cy:directed="1"/>
      <edge id="2676" label="IKBKG (pp) TANK" source="2139" target="1932" cy:directed="1"/>
      <edge id="2675" label="IKBKG (pp) CCDC138" source="2139" target="2112" cy:directed="1"/>
      <edge id="2674" label="IKBKG (pp) TRIP6" source="2139" target="1943" cy:directed="1"/>
      <edge id="2673" label="IKBKG (pp) NUP43" source="2139" target="1945" cy:directed="1"/>
      <edge id="2672" label="IKBKG (pp) MPHOSPH9" source="2139" target="1947" cy:directed="1"/>
      <edge id="2671" label="IKBKG (pp) NTPCR" source="2139" target="1882" cy:directed="1"/>
      <edge id="2670" label="IKBKG (pp) AKR7A2" source="2139" target="1981" cy:directed="1"/>
      <edge id="2669" label="IKBKG (pp) PCSK5" source="2139" target="2054" cy:directed="1"/>
      <edge id="2668" label="IKBKG (pp) G3BP1" source="2139" target="1989" cy:directed="1"/>
      <edge id="2667" label="IKBKG (pp) FAM83H" source="2139" target="1951" cy:directed="1"/>
      <edge id="2666" label="IKBKG (pp) PLEKHB2" source="2139" target="1971" cy:directed="1"/>
      <edge id="2665" label="IKBKG (pp) CYLD" source="2139" target="1996" cy:directed="1"/>
      <edge id="2664" label="IKBKG (pp) TNFRSF1A" source="2139" target="2011" cy:directed="1"/>
      <edge id="2663" label="IKBKG (pp) TNF" source="2139" target="2009" cy:directed="1"/>
      <edge id="2662" label="IKBKG (pp) TNFAIP3" source="2139" target="1974" cy:directed="1"/>
      <edge id="2661" label="IKBKG (pp) ACTG1" source="2139" target="2045" cy:directed="1"/>
      <edge id="2660" label="IKBKG (pp) IDE" source="2139" target="2047" cy:directed="1"/>
      <edge id="2659" label="IKBKG (pp) CSNK1D" source="2139" target="2125" cy:directed="1"/>
      <edge id="2658" label="IKBKG (pp) CSNK1A1" source="2139" target="1937" cy:directed="1"/>
      <edge id="2657" label="IKBKG (pp) IKBKB" source="2139" target="2117" cy:directed="1"/>
      <edge id="2656" label="IKBKG (pp) AMOT" source="2139" target="2079" cy:directed="1"/>
      <edge id="2655" label="IKBKG (pp) CCDC14" source="2139" target="2126" cy:directed="1"/>
      <edge id="2654" label="IKBKG (pp) RNF31" source="2139" target="2127" cy:directed="1"/>
      <edge id="2653" label="IKBKG (pp) MPP5" source="2139" target="2129" cy:directed="1"/>
      <edge id="2652" label="IKBKG (pp) USP54" source="2139" target="2130" cy:directed="1"/>
      <edge id="2651" label="IKBKG (pp) TBK1" source="2139" target="2155" cy:directed="1"/>
      <edge id="2650" label="IKBKG (pp) TNRC6A" source="2139" target="2132" cy:directed="1"/>
      <edge id="2649" label="IKBKG (pp) KIAA1671" source="2139" target="2147" cy:directed="1"/>
      <edge id="2648" label="IKBKG (pp) ALMS1" source="2139" target="2133" cy:directed="1"/>
      <edge id="2647" label="IKBKG (pp) TNRC6B" source="2139" target="2134" cy:directed="1"/>
      <edge id="2646" label="IKBKG (pp) NF2" source="2139" target="2136" cy:directed="1"/>
      <edge id="2645" label="IKBKG (pp) CHUK" source="2139" target="2138" cy:directed="1"/>
      <edge id="2644" label="RNF31 (pp) HNRNPCL2" source="2127" target="1980" cy:directed="1"/>
      <edge id="2643" label="RNF31 (pp) CD82" source="2127" target="2091" cy:directed="1"/>
      <edge id="2642" label="RNF31 (pp) HM13" source="2127" target="2154" cy:directed="1"/>
      <edge id="2641" label="RNF31 (pp) DNAH8" source="2127" target="2156" cy:directed="1"/>
      <edge id="2640" label="RNF31 (pp) GOLGA3" source="2127" target="2157" cy:directed="1"/>
      <edge id="2639" label="RNF31 (pp) GDI1" source="2127" target="2158" cy:directed="1"/>
      <edge id="2638" label="RNF31 (pp) REEP5" source="2127" target="1844" cy:directed="1"/>
      <edge id="2637" label="RNF31 (pp) SPR" source="2127" target="1992" cy:directed="1"/>
      <edge id="2636" label="RNF31 (pp) TNFAIP3" source="2127" target="1974" cy:directed="1"/>
      <edge id="2635" label="RNF31 (pp) TNF" source="2127" target="2009" cy:directed="1"/>
      <edge id="2634" label="RNF31 (pp) TNIP1" source="2127" target="1954" cy:directed="1"/>
      <edge id="2633" label="RNF31 (pp) RTN3" source="2127" target="2037" cy:directed="1"/>
      <edge id="2632" label="TNFAIP3 (pp) SEPSECS" source="1974" target="2086" cy:directed="1"/>
      <edge id="2631" label="TNFAIP3 (pp) SDK2" source="1974" target="1923" cy:directed="1"/>
      <edge id="2630" label="TNFAIP3 (pp) LRRC69" source="1974" target="2088" cy:directed="1"/>
      <edge id="2629" label="TNFAIP3 (pp) GALNT1" source="1974" target="2090" cy:directed="1"/>
      <edge id="2628" label="TNFAIP3 (pp) AFM" source="1974" target="1997" cy:directed="1"/>
      <edge id="2627" label="TNFAIP3 (pp) S1PR2" source="1974" target="2027" cy:directed="1"/>
      <edge id="2626" label="TNFAIP3 (pp) TNF" source="1974" target="2009" cy:directed="1"/>
      <edge id="2625" label="TNFAIP3 (pp) RCC2" source="1974" target="1984" cy:directed="1"/>
      <edge id="2624" label="TNFAIP3 (pp) TTR" source="1974" target="1985" cy:directed="1"/>
      <edge id="2623" label="TNFAIP3 (pp) PREP" source="1974" target="2020" cy:directed="1"/>
      <edge id="2622" label="TNFAIP3 (pp) MYH11" source="1974" target="2103" cy:directed="1"/>
      <edge id="2621" label="TNFAIP3 (pp) HABP2" source="1974" target="1986" cy:directed="1"/>
      <edge id="2620" label="TNFAIP3 (pp) CALCOCO2" source="1974" target="1987" cy:directed="1"/>
      <edge id="2619" label="TNFAIP3 (pp) STAT1" source="1974" target="1988" cy:directed="1"/>
      <edge id="2618" label="TNFAIP3 (pp) PCSK5" source="1974" target="2054" cy:directed="1"/>
      <edge id="2617" label="TNFAIP3 (pp) G3BP1" source="1974" target="1989" cy:directed="1"/>
      <edge id="2616" label="TNFAIP3 (pp) FZD7" source="1974" target="2014" cy:directed="1"/>
      <edge id="2615" label="TNFAIP3 (pp) TRADD" source="1974" target="1967" cy:directed="1"/>
      <edge id="2614" label="TNFAIP3 (pp) TNFRSF1A" source="1974" target="2011" cy:directed="1"/>
      <edge id="2613" label="TNFAIP3 (pp) OPTN" source="1974" target="2150" cy:directed="1"/>
      <edge id="2612" label="TNFAIP3 (pp) SLC26A2" source="1974" target="2030" cy:directed="1"/>
      <edge id="2611" label="TNFAIP3 (pp) RIPK1" source="1974" target="1964" cy:directed="1"/>
      <edge id="2610" label="TNFAIP3 (pp) ART4" source="1974" target="2057" cy:directed="1"/>
      <edge id="2609" label="TNFAIP3 (pp) AZI2" source="1974" target="2059" cy:directed="1"/>
      <edge id="2608" label="TNFAIP3 (pp) TBK1" source="1974" target="2155" cy:directed="1"/>
      <edge id="2607" label="TNFAIP3 (pp) TAX1BP1" source="1974" target="2061" cy:directed="1"/>
      <edge id="2606" label="TNFAIP3 (pp) TNIP2" source="1974" target="1930" cy:directed="1"/>
      <edge id="2605" label="TNFAIP3 (pp) TNIP1" source="1974" target="1954" cy:directed="1"/>
      <edge id="2604" label="TNFAIP3 (pp) KIF5C" source="1974" target="2141" cy:directed="1"/>
      <edge id="2603" label="TNFAIP3 (pp) C3orf58" source="1974" target="1969" cy:directed="1"/>
      <edge id="2602" label="TNFAIP3 (pp) PLEKHB2" source="1974" target="1971" cy:directed="1"/>
      <edge id="2601" label="TNFAIP3 (pp) TRAF2" source="1974" target="1973" cy:directed="1"/>
      <edge id="2600" label="TRAF2 (pp) TNFAIP3" source="1973" target="1974" cy:directed="1"/>
      <edge id="2599" label="TRAF2 (pp) MAVS" source="1973" target="2040" cy:directed="1"/>
      <edge id="2598" label="TRAF2 (pp) ARG1" source="1973" target="2042" cy:directed="1"/>
      <edge id="2597" label="TRAF2 (pp) ZFAND6" source="1973" target="2044" cy:directed="1"/>
      <edge id="2596" label="TRAF2 (pp) CSNK1A1" source="1973" target="1937" cy:directed="1"/>
      <edge id="2595" label="TRAF2 (pp) TENM3" source="1973" target="1942" cy:directed="1"/>
      <edge id="2594" label="TRAF2 (pp) SLC7A11" source="1973" target="2108" cy:directed="1"/>
      <edge id="2593" label="TRAF2 (pp) DENND5A" source="1973" target="1944" cy:directed="1"/>
      <edge id="2592" label="TRAF2 (pp) UMAD1" source="1973" target="1849" cy:directed="1"/>
      <edge id="2591" label="TRAF2 (pp) FAM188A" source="1973" target="1956" cy:directed="1"/>
      <edge id="2590" label="TRAF2 (pp) NCS1" source="1973" target="2087" cy:directed="1"/>
      <edge id="2589" label="TRAF2 (pp) TNIP2" source="1973" target="1930" cy:directed="1"/>
      <edge id="2588" label="TRAF2 (pp) USP25" source="1973" target="2128" cy:directed="1"/>
      <edge id="2587" label="TRAF2 (pp) EIF4G2" source="1973" target="1910" cy:directed="1"/>
      <edge id="2586" label="TRAF2 (pp) IGHG1" source="1973" target="1896" cy:directed="1"/>
      <edge id="2585" label="TRAF2 (pp) CPVL" source="1973" target="1850" cy:directed="1"/>
      <edge id="2584" label="TRAF2 (pp) PLEC" source="1973" target="1879" cy:directed="1"/>
      <edge id="2583" label="TRAF2 (pp) VPS37D" source="1973" target="1852" cy:directed="1"/>
      <edge id="2582" label="TRAF2 (pp) C1orf122" source="1973" target="1854" cy:directed="1"/>
      <edge id="2581" label="TRAF2 (pp) CEP85" source="1973" target="1993" cy:directed="1"/>
      <edge id="2580" label="TRAF2 (pp) EPHA5" source="1973" target="1994" cy:directed="1"/>
      <edge id="2579" label="TRAF2 (pp) KRT80" source="1973" target="1995" cy:directed="1"/>
      <edge id="2578" label="TRAF2 (pp) TNF" source="1973" target="2009" cy:directed="1"/>
      <edge id="2577" label="TRAF2 (pp) PTBP2" source="1973" target="2010" cy:directed="1"/>
      <edge id="2576" label="TRAF2 (pp) RIPK1" source="1973" target="1964" cy:directed="1"/>
      <edge id="2575" label="TRAF2 (pp) TNFRSF1A" source="1973" target="2011" cy:directed="1"/>
      <edge id="2574" label="TRAF2 (pp) TNIP1" source="1973" target="1954" cy:directed="1"/>
      <edge id="2573" label="TRAF2 (pp) RAB9A" source="1973" target="2012" cy:directed="1"/>
      <edge id="2572" label="TRAF2 (pp) TMEM178B" source="1973" target="2013" cy:directed="1"/>
      <edge id="2571" label="TRAF2 (pp) FZD7" source="1973" target="2014" cy:directed="1"/>
      <edge id="2570" label="TRAF2 (pp) PLEKHB2" source="1973" target="1971" cy:directed="1"/>
      <edge id="2569" label="TRAF2 (pp) UEVLD" source="1973" target="1902" cy:directed="1"/>
      <edge id="2568" label="TRAF2 (pp) CD82" source="1973" target="2091" cy:directed="1"/>
      <edge id="2567" label="TRAF2 (pp) DHFR" source="1973" target="2038" cy:directed="1"/>
      <edge id="2566" label="TRAF2 (pp) TRADD" source="1973" target="1967" cy:directed="1"/>
      <edge id="2565" label="TRAF2 (pp) USP54" source="1973" target="2130" cy:directed="1"/>
      <edge id="2564" label="TRAF2 (pp) ACTG1" source="1973" target="2045" cy:directed="1"/>
      <edge id="2563" label="TRAF2 (pp) BIRC2" source="1973" target="1922" cy:directed="1"/>
      <edge id="2562" label="TRAF2 (pp) FREM2" source="1973" target="2095" cy:directed="1"/>
      <edge id="2561" label="TRAF2 (pp) STAU2" source="1973" target="2096" cy:directed="1"/>
      <edge id="2560" label="TRAF2 (pp) DYRK1A" source="1973" target="2097" cy:directed="1"/>
      <edge id="2559" label="TRAF2 (pp) TANK" source="1973" target="1932" cy:directed="1"/>
      <edge id="2558" label="TRAF2 (pp) TROAP" source="1973" target="2100" cy:directed="1"/>
      <edge id="2557" label="TRAF2 (pp) MOXD1" source="1973" target="2101" cy:directed="1"/>
      <edge id="2556" label="TRAF2 (pp) TRAF3" source="1973" target="1962" cy:directed="1"/>
      <edge id="2555" label="TRAF2 (pp) MYH11" source="1973" target="2103" cy:directed="1"/>
      <edge id="2554" label="TRAF2 (pp) MLF1" source="1973" target="1921" cy:directed="1"/>
      <edge id="2553" label="TRAF2 (pp) ULK3" source="1973" target="2145" cy:directed="1"/>
      <edge id="2552" label="TRAF2 (pp) TBK1" source="1973" target="2155" cy:directed="1"/>
      <edge id="2551" label="TRAF2 (pp) PSMB3" source="1973" target="1853" cy:directed="1"/>
      <edge id="2550" label="TRADD (pp) THAP4" source="1967" target="2082" cy:directed="1"/>
      <edge id="2549" label="TRADD (pp) CHST12" source="1967" target="2084" cy:directed="1"/>
      <edge id="2548" label="TRADD (pp) TNF" source="1967" target="2009" cy:directed="1"/>
      <edge id="2547" label="TRADD (pp) RBP4" source="1967" target="1953" cy:directed="1"/>
      <edge id="2546" label="TRADD (pp) PKN2" source="1967" target="1914" cy:directed="1"/>
      <edge id="2545" label="TRADD (pp) DRG1" source="1967" target="1955" cy:directed="1"/>
      <edge id="2544" label="TRADD (pp) BIRC2" source="1967" target="1922" cy:directed="1"/>
      <edge id="2543" label="TRADD (pp) RANBP2" source="1967" target="1957" cy:directed="1"/>
      <edge id="2542" label="TRADD (pp) PDPN" source="1967" target="1959" cy:directed="1"/>
      <edge id="2541" label="TRADD (pp) HERC4" source="1967" target="1961" cy:directed="1"/>
      <edge id="2540" label="TRADD (pp) HAPLN3" source="1967" target="1963" cy:directed="1"/>
      <edge id="2539" label="TRADD (pp) SRP19" source="1967" target="1965" cy:directed="1"/>
      <edge id="2538" label="TRADD (pp) RFC3" source="1967" target="1890" cy:directed="1"/>
      <edge id="2537" label="TRADD (pp) OGN" source="1967" target="1968" cy:directed="1"/>
      <edge id="2536" label="TRADD (pp) NUP85" source="1967" target="1970" cy:directed="1"/>
      <edge id="2535" label="TRADD (pp) NLGN1" source="1967" target="1972" cy:directed="1"/>
      <edge id="2534" label="TRADD (pp) KLKB1" source="1967" target="1975" cy:directed="1"/>
      <edge id="2533" label="TRADD (pp) DUS3L" source="1967" target="1976" cy:directed="1"/>
      <edge id="2532" label="TRADD (pp) COASY" source="1967" target="1977" cy:directed="1"/>
      <edge id="2531" label="TRADD (pp) CHPF" source="1967" target="1978" cy:directed="1"/>
      <edge id="2530" label="TRADD (pp) ANTXR1" source="1967" target="1979" cy:directed="1"/>
      <edge id="2529" label="TRADD (pp) S1PR2" source="1967" target="2027" cy:directed="1"/>
      <edge id="2528" label="TRADD (pp) RCC2" source="1967" target="1984" cy:directed="1"/>
      <edge id="2527" label="TRADD (pp) HNRNPCL2" source="1967" target="1980" cy:directed="1"/>
      <edge id="2526" label="TRADD (pp) AKR7A2" source="1967" target="1981" cy:directed="1"/>
      <edge id="2525" label="TRADD (pp) THOC2" source="1967" target="1982" cy:directed="1"/>
      <edge id="2524" label="TRADD (pp) PLOD1" source="1967" target="1983" cy:directed="1"/>
      <edge id="2523" label="TRADD (pp) G3BP1" source="1967" target="1989" cy:directed="1"/>
      <edge id="2522" label="TRADD (pp) AFM" source="1967" target="1997" cy:directed="1"/>
      <edge id="2521" label="TRADD (pp) C1QTNF3" source="1967" target="2028" cy:directed="1"/>
      <edge id="2520" label="TRADD (pp) NOL6" source="1967" target="2051" cy:directed="1"/>
      <edge id="2519" label="TRADD (pp) IKBKG" source="1967" target="2139" cy:directed="1"/>
      <edge id="2518" label="TRADD (pp) PCSK5" source="1967" target="2054" cy:directed="1"/>
      <edge id="2517" label="TRADD (pp) UEVLD" source="1967" target="1902" cy:directed="1"/>
      <edge id="2516" label="TRADD (pp) ULK3" source="1967" target="2145" cy:directed="1"/>
      <edge id="2515" label="TRADD (pp) TRAF2" source="1967" target="1973" cy:directed="1"/>
      <edge id="2514" label="TRADD (pp) UBE2V2" source="1967" target="1939" cy:directed="1"/>
      <edge id="2513" label="TRADD (pp) EIF3C" source="1967" target="1941" cy:directed="1"/>
      <edge id="2512" label="TRADD (pp) TENM3" source="1967" target="1942" cy:directed="1"/>
      <edge id="2511" label="TRADD (pp) DENND5A" source="1967" target="1944" cy:directed="1"/>
      <edge id="2510" label="TRADD (pp) RRP9" source="1967" target="1946" cy:directed="1"/>
      <edge id="2509" label="TRADD (pp) POLR1A" source="1967" target="1948" cy:directed="1"/>
      <edge id="2508" label="TRADD (pp) PCOLCE2" source="1967" target="1949" cy:directed="1"/>
      <edge id="2507" label="TRADD (pp) PRPF4" source="1967" target="1950" cy:directed="1"/>
      <edge id="2506" label="TRADD (pp) RNF115" source="1967" target="1952" cy:directed="1"/>
      <edge id="2505" label="TRADD (pp) TNIP1" source="1967" target="1954" cy:directed="1"/>
      <edge id="2504" label="TRADD (pp) TNFAIP3" source="1967" target="1974" cy:directed="1"/>
      <edge id="2503" label="TRADD (pp) FAM188A" source="1967" target="1956" cy:directed="1"/>
      <edge id="2502" label="TRADD (pp) CASP8" source="1967" target="1958" cy:directed="1"/>
      <edge id="2501" label="TRADD (pp) CCAR2" source="1967" target="1960" cy:directed="1"/>
      <edge id="2500" label="TRADD (pp) TRAF3" source="1967" target="1962" cy:directed="1"/>
      <edge id="2499" label="TRADD (pp) RIPK1" source="1967" target="1964" cy:directed="1"/>
      <edge id="2498" label="TRADD (pp) FADD" source="1967" target="1966" cy:directed="1"/>
      <edge id="2497" label="FADD (pp) PRDX4" source="1966" target="2070" cy:directed="1"/>
      <edge id="2496" label="FADD (pp) CKMT1A" source="1966" target="2071" cy:directed="1"/>
      <edge id="2495" label="FADD (pp) CHUK" source="1966" target="2138" cy:directed="1"/>
      <edge id="2494" label="FADD (pp) GOLGA7B" source="1966" target="2073" cy:directed="1"/>
      <edge id="2493" label="FADD (pp) EPB41L4B" source="1966" target="2075" cy:directed="1"/>
      <edge id="2492" label="FADD (pp) SDK2" source="1966" target="1923" cy:directed="1"/>
      <edge id="2491" label="FADD (pp) ROR1" source="1966" target="2142" cy:directed="1"/>
      <edge id="2490" label="FADD (pp) AKR7A2" source="1966" target="1981" cy:directed="1"/>
      <edge id="2489" label="FADD (pp) SLC7A11" source="1966" target="2108" cy:directed="1"/>
      <edge id="2488" label="FADD (pp) TNFAIP3" source="1966" target="1974" cy:directed="1"/>
      <edge id="2487" label="FADD (pp) IKBKG" source="1966" target="2139" cy:directed="1"/>
      <edge id="2486" label="FADD (pp) RHOQ" source="1966" target="1936" cy:directed="1"/>
      <edge id="2485" label="FADD (pp) NUPL2" source="1966" target="1938" cy:directed="1"/>
      <edge id="2484" label="FADD (pp) DNAAF1" source="1966" target="1940" cy:directed="1"/>
      <edge id="2483" label="FADD (pp) ULK3" source="1966" target="2145" cy:directed="1"/>
      <edge id="2482" label="FADD (pp) PREP" source="1966" target="2020" cy:directed="1"/>
      <edge id="2481" label="FADD (pp) RNF41" source="1966" target="2021" cy:directed="1"/>
      <edge id="2480" label="FADD (pp) IGHA1" source="1966" target="2023" cy:directed="1"/>
      <edge id="2479" label="FADD (pp) DLD" source="1966" target="2025" cy:directed="1"/>
      <edge id="2478" label="FADD (pp) S1PR2" source="1966" target="2027" cy:directed="1"/>
      <edge id="2477" label="FADD (pp) ACTG1" source="1966" target="2045" cy:directed="1"/>
      <edge id="2476" label="FADD (pp) TNIP1" source="1966" target="1954" cy:directed="1"/>
      <edge id="2475" label="FADD (pp) KIF2C" source="1966" target="2107" cy:directed="1"/>
      <edge id="2474" label="FADD (pp) CSNK1D" source="1966" target="2125" cy:directed="1"/>
      <edge id="2473" label="FADD (pp) RIPK1" source="1966" target="1964" cy:directed="1"/>
      <edge id="2472" label="FADD (pp) CCDC50" source="1966" target="2143" cy:directed="1"/>
      <edge id="2471" label="FADD (pp) ROBO2" source="1966" target="1933" cy:directed="1"/>
      <edge id="2470" label="FADD (pp) CASP8" source="1966" target="1958" cy:directed="1"/>
      <edge id="2469" label="FADD (pp) NDNF" source="1966" target="1935" cy:directed="1"/>
      <edge id="2468" label="FADD (pp) CSNK1A1" source="1966" target="1937" cy:directed="1"/>
      <edge id="2467" label="TNIP1 (pp) SULF2" source="1954" target="2031" cy:directed="1"/>
      <edge id="2466" label="TNIP1 (pp) SPOCK3" source="1954" target="2032" cy:directed="1"/>
      <edge id="2465" label="TNIP1 (pp) LAMA4" source="1954" target="1999" cy:directed="1"/>
      <edge id="2464" label="TNIP1 (pp) HAPLN3" source="1954" target="1963" cy:directed="1"/>
      <edge id="2463" label="TNIP1 (pp) TRADD" source="1954" target="1967" cy:directed="1"/>
      <edge id="2462" label="TNIP1 (pp) EMILIN2" source="1954" target="2034" cy:directed="1"/>
      <edge id="2461" label="TNIP1 (pp) PODXL2" source="1954" target="2036" cy:directed="1"/>
      <edge id="2460" label="TNIP1 (pp) PJA2" source="1954" target="2098" cy:directed="1"/>
      <edge id="2459" label="TNIP1 (pp) TENM3" source="1954" target="1942" cy:directed="1"/>
      <edge id="2458" label="TNIP1 (pp) PLEKHB2" source="1954" target="1971" cy:directed="1"/>
      <edge id="2457" label="TNIP1 (pp) MOXD1" source="1954" target="2101" cy:directed="1"/>
      <edge id="2456" label="TNIP1 (pp) CACNA2D2" source="1954" target="1911" cy:directed="1"/>
      <edge id="2455" label="TNIP1 (pp) UMAD1" source="1954" target="1849" cy:directed="1"/>
      <edge id="2454" label="TNIP1 (pp) RNF115" source="1954" target="1952" cy:directed="1"/>
      <edge id="2453" label="TNIP1 (pp) ROR1" source="1954" target="2142" cy:directed="1"/>
      <edge id="2452" label="TNIP1 (pp) MYH11" source="1954" target="2103" cy:directed="1"/>
      <edge id="2451" label="TNIP1 (pp) NID2" source="1954" target="2003" cy:directed="1"/>
      <edge id="2450" label="TNIP1 (pp) EIF3C" source="1954" target="1941" cy:directed="1"/>
      <edge id="2449" label="TNIP1 (pp) TNFRSF1A" source="1954" target="2011" cy:directed="1"/>
      <edge id="2448" label="TNIP1 (pp) SMOC1" source="1954" target="2005" cy:directed="1"/>
      <edge id="2447" label="TNIP1 (pp) SET" source="1954" target="2006" cy:directed="1"/>
      <edge id="2446" label="TNIP1 (pp) HIST3H2BB" source="1954" target="2007" cy:directed="1"/>
      <edge id="2445" label="TNIP1 (pp) COCH" source="1954" target="2008" cy:directed="1"/>
      <edge id="2444" label="TNIP1 (pp) NDNF" source="1954" target="1935" cy:directed="1"/>
      <edge id="2443" label="TNIP1 (pp) TNF" source="1954" target="2009" cy:directed="1"/>
      <edge id="2442" label="TNIP1 (pp) TNFAIP3" source="1954" target="1974" cy:directed="1"/>
      <edge id="2441" label="TNIP1 (pp) TNIP2" source="1954" target="1930" cy:directed="1"/>
      <edge id="2440" label="TNIP1 (pp) TAX1BP1" source="1954" target="2061" cy:directed="1"/>
      <edge id="2439" label="TNIP1 (pp) CD82" source="1954" target="2091" cy:directed="1"/>
      <edge id="2438" label="TNIP1 (pp) MLF1" source="1954" target="1921" cy:directed="1"/>
      <edge id="2437" label="TNIP1 (pp) UEVLD" source="1954" target="1902" cy:directed="1"/>
      <edge id="2436" label="TNIP1 (pp) ULK3" source="1954" target="2145" cy:directed="1"/>
      <edge id="2435" label="TNIP1 (pp) OPTN" source="1954" target="2150" cy:directed="1"/>
      <edge id="2434" label="TNIP1 (pp) SEMA4G" source="1954" target="2152" cy:directed="1"/>
      <edge id="2433" label="TNIP1 (pp) NBR1" source="1954" target="2153" cy:directed="1"/>
      <edge id="2432" label="TNIP1 (pp) TBK1" source="1954" target="2155" cy:directed="1"/>
      <edge id="2431" label="TANK (pp) SCPEP1" source="1932" target="2046" cy:directed="1"/>
      <edge id="2430" label="TANK (pp) PPT1" source="1932" target="2048" cy:directed="1"/>
      <edge id="2429" label="TANK (pp) MRC2" source="1932" target="2049" cy:directed="1"/>
      <edge id="2428" label="TANK (pp) HSPA13" source="1932" target="2050" cy:directed="1"/>
      <edge id="2427" label="TANK (pp) CAMK2B" source="1932" target="2052" cy:directed="1"/>
      <edge id="2426" label="TANK (pp) CPS1" source="1932" target="2053" cy:directed="1"/>
      <edge id="2425" label="TANK (pp) ADSS" source="1932" target="2055" cy:directed="1"/>
      <edge id="2424" label="TANK (pp) RFC4" source="1932" target="2056" cy:directed="1"/>
      <edge id="2423" label="TANK (pp) PRSS3" source="1932" target="2058" cy:directed="1"/>
      <edge id="2422" label="TANK (pp) NPEPPSL1" source="1932" target="2060" cy:directed="1"/>
      <edge id="2421" label="TANK (pp) JCHAIN" source="1932" target="2062" cy:directed="1"/>
      <edge id="2420" label="TANK (pp) OIT3" source="1932" target="2063" cy:directed="1"/>
      <edge id="2419" label="TANK (pp) MBTPS1" source="1932" target="2064" cy:directed="1"/>
      <edge id="2418" label="TANK (pp) FADD" source="1932" target="1966" cy:directed="1"/>
      <edge id="2417" label="TANK (pp) HABP2" source="1932" target="1986" cy:directed="1"/>
      <edge id="2416" label="TANK (pp) RAB11B" source="1932" target="2066" cy:directed="1"/>
      <edge id="2415" label="TANK (pp) DYNC2H1" source="1932" target="2068" cy:directed="1"/>
      <edge id="2414" label="TANK (pp) PLEKHB2" source="1932" target="1971" cy:directed="1"/>
      <edge id="2413" label="TANK (pp) TCEB1" source="1932" target="2102" cy:directed="1"/>
      <edge id="2412" label="TANK (pp) CDC6" source="1932" target="2104" cy:directed="1"/>
      <edge id="2411" label="TANK (pp) OGN" source="1932" target="1968" cy:directed="1"/>
      <edge id="2410" label="TANK (pp) HSPA2" source="1932" target="2106" cy:directed="1"/>
      <edge id="2409" label="TANK (pp) KRT80" source="1932" target="1995" cy:directed="1"/>
      <edge id="2408" label="TANK (pp) MOXD1" source="1932" target="2101" cy:directed="1"/>
      <edge id="2407" label="TANK (pp) IQGAP3" source="1932" target="2113" cy:directed="1"/>
      <edge id="2406" label="TANK (pp) GIGYF2" source="1932" target="2115" cy:directed="1"/>
      <edge id="2405" label="TANK (pp) NCS1" source="1932" target="2087" cy:directed="1"/>
      <edge id="2404" label="TANK (pp) NOL6" source="1932" target="2051" cy:directed="1"/>
      <edge id="2403" label="TANK (pp) OXSR1" source="1932" target="2131" cy:directed="1"/>
      <edge id="2402" label="TANK (pp) KIF5C" source="1932" target="2141" cy:directed="1"/>
      <edge id="2401" label="TANK (pp) PCSK5" source="1932" target="2054" cy:directed="1"/>
      <edge id="2400" label="TANK (pp) KIF14" source="1932" target="1857" cy:directed="1"/>
      <edge id="2399" label="TANK (pp) INTS7" source="1932" target="1859" cy:directed="1"/>
      <edge id="2398" label="TANK (pp) CETN3" source="1932" target="1861" cy:directed="1"/>
      <edge id="2397" label="TANK (pp) UBASH3B" source="1932" target="1863" cy:directed="1"/>
      <edge id="2396" label="TANK (pp) TRAF4" source="1932" target="1865" cy:directed="1"/>
      <edge id="2395" label="TANK (pp) SPRR1B" source="1932" target="1867" cy:directed="1"/>
      <edge id="2394" label="TANK (pp) SNAP47" source="1932" target="1869" cy:directed="1"/>
      <edge id="2393" label="TANK (pp) SH3RF1" source="1932" target="1871" cy:directed="1"/>
      <edge id="2392" label="TANK (pp) SERPINB5" source="1932" target="1873" cy:directed="1"/>
      <edge id="2391" label="TANK (pp) SAPCD2" source="1932" target="1875" cy:directed="1"/>
      <edge id="2390" label="TANK (pp) PPP2R5D" source="1932" target="1877" cy:directed="1"/>
      <edge id="2389" label="TANK (pp) PLEC" source="1932" target="1879" cy:directed="1"/>
      <edge id="2388" label="TANK (pp) OTUD7B" source="1932" target="1881" cy:directed="1"/>
      <edge id="2387" label="TANK (pp) OFD1" source="1932" target="1883" cy:directed="1"/>
      <edge id="2386" label="TANK (pp) NEK2" source="1932" target="1885" cy:directed="1"/>
      <edge id="2385" label="TANK (pp) MDH2" source="1932" target="1887" cy:directed="1"/>
      <edge id="2384" label="TANK (pp) IQCB1" source="1932" target="1889" cy:directed="1"/>
      <edge id="2383" label="TANK (pp) HIST2H3A" source="1932" target="1891" cy:directed="1"/>
      <edge id="2382" label="TANK (pp) HAX1" source="1932" target="1893" cy:directed="1"/>
      <edge id="2381" label="TANK (pp) FUBP3" source="1932" target="2002" cy:directed="1"/>
      <edge id="2380" label="TANK (pp) ERO1A" source="1932" target="1895" cy:directed="1"/>
      <edge id="2379" label="TANK (pp) EPS8" source="1932" target="1897" cy:directed="1"/>
      <edge id="2378" label="TANK (pp) CNTFR" source="1932" target="1899" cy:directed="1"/>
      <edge id="2377" label="TANK (pp) CNOT3" source="1932" target="1901" cy:directed="1"/>
      <edge id="2376" label="TANK (pp) ATP5A1" source="1932" target="1903" cy:directed="1"/>
      <edge id="2375" label="TANK (pp) ANXA4" source="1932" target="1905" cy:directed="1"/>
      <edge id="2374" label="TANK (pp) ANAPC7" source="1932" target="1907" cy:directed="1"/>
      <edge id="2373" label="TANK (pp) ZFAND2B" source="1932" target="1909" cy:directed="1"/>
      <edge id="2372" label="TANK (pp) CACNA2D2" source="1932" target="1911" cy:directed="1"/>
      <edge id="2371" label="TANK (pp) EPHB4" source="1932" target="1913" cy:directed="1"/>
      <edge id="2370" label="TANK (pp) TLDC1" source="1932" target="1915" cy:directed="1"/>
      <edge id="2369" label="TANK (pp) TBC1D31" source="1932" target="1917" cy:directed="1"/>
      <edge id="2368" label="TANK (pp) PRIM1" source="1932" target="1919" cy:directed="1"/>
      <edge id="2367" label="TANK (pp) TRIP6" source="1932" target="1943" cy:directed="1"/>
      <edge id="2366" label="TANK (pp) AMOTL1" source="1932" target="2076" cy:directed="1"/>
      <edge id="2365" label="TANK (pp) TENM3" source="1932" target="1942" cy:directed="1"/>
      <edge id="2364" label="TANK (pp) CCDC50" source="1932" target="2143" cy:directed="1"/>
      <edge id="2363" label="TANK (pp) SDK2" source="1932" target="1923" cy:directed="1"/>
      <edge id="2362" label="TANK (pp) HEATR1" source="1932" target="1925" cy:directed="1"/>
      <edge id="2361" label="TANK (pp) UTP6" source="1932" target="1927" cy:directed="1"/>
      <edge id="2360" label="TANK (pp) PFDN4" source="1932" target="1929" cy:directed="1"/>
      <edge id="2359" label="TANK (pp) GPSM1" source="1932" target="1931" cy:directed="1"/>
      <edge id="2358" label="TANK (pp) ULBP3" source="1932" target="2092" cy:directed="1"/>
      <edge id="2357" label="TANK (pp) BAIAP2L1" source="1932" target="1934" cy:directed="1"/>
      <edge id="2356" label="TANK (pp) RAB9A" source="1932" target="2012" cy:directed="1"/>
      <edge id="2355" label="TANK (pp) TNFAIP3" source="1932" target="1974" cy:directed="1"/>
      <edge id="2354" label="TANK (pp) IGHA1" source="1932" target="2023" cy:directed="1"/>
      <edge id="2353" label="TANK (pp) TRMT6" source="1932" target="2015" cy:directed="1"/>
      <edge id="2352" label="TANK (pp) NAA50" source="1932" target="2016" cy:directed="1"/>
      <edge id="2351" label="TANK (pp) FAM20C" source="1932" target="2017" cy:directed="1"/>
      <edge id="2350" label="TANK (pp) EIF3K" source="1932" target="2018" cy:directed="1"/>
      <edge id="2349" label="TANK (pp) RNF41" source="1932" target="2021" cy:directed="1"/>
      <edge id="2348" label="TANK (pp) PREP" source="1932" target="2020" cy:directed="1"/>
      <edge id="2347" label="TANK (pp) CKAP2" source="1932" target="2041" cy:directed="1"/>
      <edge id="2346" label="TANK (pp) CEP131" source="1932" target="2043" cy:directed="1"/>
      <edge id="2345" label="TANK (pp) TRAF3" source="1932" target="1962" cy:directed="1"/>
      <edge id="2344" label="TANK (pp) ACTG1" source="1932" target="2045" cy:directed="1"/>
      <edge id="2343" label="TANK (pp) TNIP1" source="1932" target="1954" cy:directed="1"/>
      <edge id="2342" label="TANK (pp) AMOT" source="1932" target="2079" cy:directed="1"/>
      <edge id="2341" label="TANK (pp) TBK1" source="1932" target="2155" cy:directed="1"/>
      <edge id="2340" label="TANK (pp) FHL1" source="1932" target="2105" cy:directed="1"/>
      <edge id="2339" label="TANK (pp) GDI1" source="1932" target="2158" cy:directed="1"/>
      <edge id="2338" label="TANK (pp) KIF2C" source="1932" target="2107" cy:directed="1"/>
      <edge id="2337" label="TANK (pp) NF2" source="1932" target="2136" cy:directed="1"/>
      <edge id="2336" label="TANK (pp) OBSL1" source="1932" target="2109" cy:directed="1"/>
      <edge id="2335" label="TANK (pp) PFDN5" source="1932" target="2110" cy:directed="1"/>
      <edge id="2334" label="TANK (pp) NCAPG2" source="1932" target="2111" cy:directed="1"/>
      <edge id="2333" label="TANK (pp) CCDC138" source="1932" target="2112" cy:directed="1"/>
      <edge id="2332" label="TANK (pp) ULK3" source="1932" target="2145" cy:directed="1"/>
      <edge id="2331" label="TANK (pp) KIF7" source="1932" target="2114" cy:directed="1"/>
      <edge id="2330" label="TANK (pp) CSNK1D" source="1932" target="2125" cy:directed="1"/>
      <edge id="2329" label="TANK (pp) PICK1" source="1932" target="2116" cy:directed="1"/>
      <edge id="2328" label="TANK (pp) CSNK1A1" source="1932" target="1937" cy:directed="1"/>
      <edge id="2327" label="TANK (pp) IKBKB" source="1932" target="2117" cy:directed="1"/>
      <edge id="2326" label="TANK (pp) CEP135" source="1932" target="2118" cy:directed="1"/>
      <edge id="2325" label="TANK (pp) TXLNG" source="1932" target="2120" cy:directed="1"/>
      <edge id="2324" label="TANK (pp) TXLNA" source="1932" target="2121" cy:directed="1"/>
      <edge id="2323" label="TANK (pp) IKBKG" source="1932" target="2139" cy:directed="1"/>
      <edge id="2322" label="TANK (pp) TRAF2" source="1932" target="1973" cy:directed="1"/>
      <edge id="2321" label="TANK (pp) CHUK" source="1932" target="2138" cy:directed="1"/>
      <edge id="2320" label="TANK (pp) CNOT1" source="1932" target="2123" cy:directed="1"/>
      <edge id="2319" label="TANK (pp) PAFAH1B1" source="1932" target="1855" cy:directed="1"/>
      <edge id="2318" label="TANK (pp) AP2A1" source="1932" target="1856" cy:directed="1"/>
      <edge id="2317" label="TANK (pp) YOD1" source="1932" target="1858" cy:directed="1"/>
      <edge id="2316" label="TANK (pp) TRAF5" source="1932" target="1860" cy:directed="1"/>
      <edge id="2315" label="TANK (pp) STK10" source="1932" target="1862" cy:directed="1"/>
      <edge id="2314" label="TANK (pp) SSNA1" source="1932" target="1864" cy:directed="1"/>
      <edge id="2313" label="TANK (pp) SERPINB4" source="1932" target="1866" cy:directed="1"/>
      <edge id="2312" label="TANK (pp) PELI1" source="1932" target="1868" cy:directed="1"/>
      <edge id="2311" label="TANK (pp) PDPK1" source="1932" target="1870" cy:directed="1"/>
      <edge id="2310" label="TANK (pp) MIB1" source="1932" target="1872" cy:directed="1"/>
      <edge id="2309" label="TANK (pp) KRT15" source="1932" target="1874" cy:directed="1"/>
      <edge id="2308" label="TANK (pp) CCDC77" source="1932" target="1876" cy:directed="1"/>
      <edge id="2307" label="TANK (pp) CALML3" source="1932" target="1878" cy:directed="1"/>
      <edge id="2306" label="TANK (pp) CCDC112" source="1932" target="1880" cy:directed="1"/>
      <edge id="2305" label="TANK (pp) NTPCR" source="1932" target="1882" cy:directed="1"/>
      <edge id="2304" label="TANK (pp) SDCBP2" source="1932" target="1884" cy:directed="1"/>
      <edge id="2303" label="TANK (pp) PARVA" source="1932" target="1886" cy:directed="1"/>
      <edge id="2302" label="TANK (pp) NOC4L" source="1932" target="1888" cy:directed="1"/>
      <edge id="2301" label="TANK (pp) RFC3" source="1932" target="1890" cy:directed="1"/>
      <edge id="2300" label="TANK (pp) RQCD1" source="1932" target="1892" cy:directed="1"/>
      <edge id="2299" label="TANK (pp) IGKC" source="1932" target="1894" cy:directed="1"/>
      <edge id="2298" label="TANK (pp) IGHG1" source="1932" target="1896" cy:directed="1"/>
      <edge id="2297" label="TANK (pp) AHNAK" source="1932" target="1898" cy:directed="1"/>
      <edge id="2296" label="TANK (pp) SASS6" source="1932" target="1900" cy:directed="1"/>
      <edge id="2295" label="TANK (pp) UEVLD" source="1932" target="1902" cy:directed="1"/>
      <edge id="2294" label="TANK (pp) RNF115" source="1932" target="1952" cy:directed="1"/>
      <edge id="2293" label="TANK (pp) ZNF598" source="1932" target="1904" cy:directed="1"/>
      <edge id="2292" label="TANK (pp) TELO2" source="1932" target="1906" cy:directed="1"/>
      <edge id="2291" label="TANK (pp) DNAJB4" source="1932" target="1908" cy:directed="1"/>
      <edge id="2290" label="TANK (pp) EIF4G2" source="1932" target="1910" cy:directed="1"/>
      <edge id="2289" label="TANK (pp) ATP5B" source="1932" target="1912" cy:directed="1"/>
      <edge id="2288" label="TANK (pp) PKN2" source="1932" target="1914" cy:directed="1"/>
      <edge id="2287" label="TANK (pp) KRT79" source="1932" target="1916" cy:directed="1"/>
      <edge id="2286" label="TANK (pp) CNOT10" source="1932" target="1918" cy:directed="1"/>
      <edge id="2285" label="TANK (pp) CEP95" source="1932" target="1920" cy:directed="1"/>
      <edge id="2284" label="TANK (pp) MLF1" source="1932" target="1921" cy:directed="1"/>
      <edge id="2283" label="TANK (pp) BIRC2" source="1932" target="1922" cy:directed="1"/>
      <edge id="2282" label="TANK (pp) GSK3B" source="1932" target="1924" cy:directed="1"/>
      <edge id="2281" label="TANK (pp) IVL" source="1932" target="1926" cy:directed="1"/>
      <edge id="2280" label="TANK (pp) GSK3A" source="1932" target="1928" cy:directed="1"/>
      <edge id="2279" label="TANK (pp) TNIP2" source="1932" target="1930" cy:directed="1"/>
      <edge id="2278" label="TNIP2 (pp) SKA1" source="1930" target="2022" cy:directed="1"/>
      <edge id="2277" label="TNIP2 (pp) C14orf80" source="1930" target="2024" cy:directed="1"/>
      <edge id="2276" label="TNIP2 (pp) PTX3" source="1930" target="2026" cy:directed="1"/>
      <edge id="2275" label="TNIP2 (pp) PTBP2" source="1930" target="2010" cy:directed="1"/>
      <edge id="2274" label="TNIP2 (pp) TMEM178B" source="1930" target="2013" cy:directed="1"/>
      <edge id="2273" label="TNIP2 (pp) OTUD7B" source="1930" target="1881" cy:directed="1"/>
      <edge id="2272" label="TNIP2 (pp) NCS1" source="1930" target="2087" cy:directed="1"/>
      <edge id="2271" label="TNIP2 (pp) CSNK1D" source="1930" target="2125" cy:directed="1"/>
      <edge id="2270" label="TNIP2 (pp) EMILIN2" source="1930" target="2034" cy:directed="1"/>
      <edge id="2269" label="TNIP2 (pp) SPATA2L" source="1930" target="2029" cy:directed="1"/>
      <edge id="2268" label="TNIP2 (pp) MKRN2" source="1930" target="2148" cy:directed="1"/>
      <edge id="2267" label="TNIP2 (pp) TELO2" source="1930" target="1906" cy:directed="1"/>
      <edge id="2266" label="TNIP2 (pp) TLDC1" source="1930" target="1915" cy:directed="1"/>
      <edge id="2265" label="TNIP2 (pp) MLF1" source="1930" target="1921" cy:directed="1"/>
      <edge id="2264" label="TNIP2 (pp) TENM3" source="1930" target="1942" cy:directed="1"/>
      <edge id="2263" label="TNIP2 (pp) CD82" source="1930" target="2091" cy:directed="1"/>
      <edge id="2262" label="TNIP2 (pp) YTHDF1" source="1930" target="2122" cy:directed="1"/>
      <edge id="2261" label="TNIP2 (pp) DTNA" source="1930" target="2124" cy:directed="1"/>
      <edge id="2260" label="TNIP2 (pp) TNFAIP3" source="1930" target="1974" cy:directed="1"/>
      <edge id="2259" label="TNIP2 (pp) CAPN1" source="1930" target="2135" cy:directed="1"/>
      <edge id="2258" label="TNIP2 (pp) GOLPH3" source="1930" target="2137" cy:directed="1"/>
      <edge id="2257" label="TNIP2 (pp) ZNF598" source="1930" target="1904" cy:directed="1"/>
      <edge id="2256" label="TNIP2 (pp) RBM4" source="1930" target="2140" cy:directed="1"/>
      <edge id="2255" label="TNIP2 (pp) YTHDF3" source="1930" target="1990" cy:directed="1"/>
      <edge id="2254" label="TNIP2 (pp) SASS6" source="1930" target="1900" cy:directed="1"/>
      <edge id="2253" label="TNIP2 (pp) RIPK1" source="1930" target="1964" cy:directed="1"/>
      <edge id="2252" label="TNIP2 (pp) SMOC1" source="1930" target="2005" cy:directed="1"/>
      <edge id="2251" label="TNIP2 (pp) IKBKB" source="1930" target="2117" cy:directed="1"/>
      <edge id="2250" label="TNIP2 (pp) EIF3K" source="1930" target="2018" cy:directed="1"/>
      <edge id="2249" label="TNIP2 (pp) LAMA4" source="1930" target="1999" cy:directed="1"/>
      <edge id="2248" label="TNIP2 (pp) ZCCHC3" source="1930" target="2000" cy:directed="1"/>
      <edge id="2247" label="TNIP2 (pp) VPS37A" source="1930" target="2001" cy:directed="1"/>
      <edge id="2246" label="TNIP2 (pp) FUBP3" source="1930" target="2002" cy:directed="1"/>
      <edge id="2245" label="TNIP2 (pp) TNRC6A" source="1930" target="2132" cy:directed="1"/>
      <edge id="2244" label="TNIP2 (pp) DHFR" source="1930" target="2038" cy:directed="1"/>
      <edge id="2243" label="TNIP2 (pp) TNF" source="1930" target="2009" cy:directed="1"/>
      <edge id="2242" label="TNIP2 (pp) TNIP1" source="1930" target="1954" cy:directed="1"/>
      <edge id="2241" label="TNIP2 (pp) SHARPIN" source="1930" target="2159" cy:directed="1"/>
      <edge id="2240" label="TNIP2 (pp) TNFRSF1A" source="1930" target="2011" cy:directed="1"/>
      <edge id="2239" label="TNIP2 (pp) NID2" source="1930" target="2003" cy:directed="1"/>
      <edge id="2238" label="TNIP2 (pp) NDNF" source="1930" target="1935" cy:directed="1"/>
      <edge id="2237" label="TNIP2 (pp) MPP5" source="1930" target="2129" cy:directed="1"/>
      <edge id="2236" label="TNIP2 (pp) SDCCAG3" source="1930" target="2004" cy:directed="1"/>
      <edge id="2235" label="TNIP2 (pp) BAG4" source="1930" target="2033" cy:directed="1"/>
      <edge id="2234" label="TNIP2 (pp) CHUK" source="1930" target="2138" cy:directed="1"/>
      <edge id="2233" label="TNIP2 (pp) CEP164" source="1930" target="2067" cy:directed="1"/>
      <edge id="2232" label="TNIP2 (pp) NCKAP5L" source="1930" target="2069" cy:directed="1"/>
      <edge id="2231" label="TNIP2 (pp) UEVLD" source="1930" target="1902" cy:directed="1"/>
      <edge id="2230" label="TNIP2 (pp) TBK1" source="1930" target="2155" cy:directed="1"/>
      <edge id="2229" label="TNIP2 (pp) IKBKG" source="1930" target="2139" cy:directed="1"/>
      <edge id="2228" label="TNIP2 (pp) MOXD1" source="1930" target="2101" cy:directed="1"/>
      <edge id="2227" label="TNIP2 (pp) PRRC2A" source="1930" target="2072" cy:directed="1"/>
      <edge id="2226" label="TNIP2 (pp) TRIM25" source="1930" target="2074" cy:directed="1"/>
      <edge id="2225" label="TNIP2 (pp) USP54" source="1930" target="2130" cy:directed="1"/>
      <edge id="2224" label="TNIP2 (pp) TNRC6B" source="1930" target="2134" cy:directed="1"/>
      <edge id="2223" label="TNIP2 (pp) NF2" source="1930" target="2136" cy:directed="1"/>
      <edge id="2222" label="TNIP2 (pp) AMOTL1" source="1930" target="2076" cy:directed="1"/>
      <edge id="2221" label="TNIP2 (pp) YLPM1" source="1930" target="2077" cy:directed="1"/>
      <edge id="2220" label="TNIP2 (pp) AMOT" source="1930" target="2079" cy:directed="1"/>
      <edge id="2219" label="TNIP2 (pp) ULK3" source="1930" target="2145" cy:directed="1"/>
      <edge id="2218" label="TNIP2 (pp) KIAA1671" source="1930" target="2147" cy:directed="1"/>
      <edge id="2217" label="TNIP2 (pp) TRO" source="1930" target="2149" cy:directed="1"/>
      <edge id="2216" label="BIRC2 (pp) TNFAIP3" source="1922" target="1974" cy:directed="1"/>
      <edge id="2215" label="BIRC2 (pp) EFNA5" source="1922" target="2019" cy:directed="1"/>
      <edge id="2214" label="BIRC2 (pp) CD82" source="1922" target="2091" cy:directed="1"/>
      <edge id="2213" label="BIRC2 (pp) C3orf58" source="1922" target="1969" cy:directed="1"/>
      <edge id="2212" label="BIRC2 (pp) LGR4" source="1922" target="2093" cy:directed="1"/>
      <edge id="2211" label="BIRC2 (pp) TRAF1" source="1922" target="2094" cy:directed="1"/>
      <edge id="2210" label="BIRC2 (pp) RNF31" source="1922" target="2127" cy:directed="1"/>
      <edge id="2209" label="BIRC2 (pp) UMAD1" source="1922" target="1849" cy:directed="1"/>
      <edge id="2208" label="BIRC2 (pp) HAPLN3" source="1922" target="1963" cy:directed="1"/>
      <edge id="2207" label="BIRC2 (pp) TNIP2" source="1922" target="1930" cy:directed="1"/>
      <edge id="2206" label="BIRC2 (pp) OPTN" source="1922" target="2150" cy:directed="1"/>
      <edge id="2205" label="BIRC2 (pp) RNF115" source="1922" target="1952" cy:directed="1"/>
      <edge id="2204" label="BIRC2 (pp) UEVLD" source="1922" target="1902" cy:directed="1"/>
      <edge id="2203" label="BIRC2 (pp) IKBKG" source="1922" target="2139" cy:directed="1"/>
      <edge id="2202" label="BIRC2 (pp) AKR7A2" source="1922" target="1981" cy:directed="1"/>
      <edge id="2201" label="BIRC2 (pp) PLOD1" source="1922" target="1983" cy:directed="1"/>
      <edge id="2200" label="BIRC2 (pp) YOD1" source="1922" target="1858" cy:directed="1"/>
      <edge id="2199" label="BIRC2 (pp) UBE2V2" source="1922" target="1939" cy:directed="1"/>
      <edge id="2198" label="BIRC2 (pp) TNF" source="1922" target="2009" cy:directed="1"/>
      <edge id="2197" label="BIRC2 (pp) TNFRSF1A" source="1922" target="2011" cy:directed="1"/>
      <edge id="2196" label="BIRC2 (pp) TAX1BP1" source="1922" target="2061" cy:directed="1"/>
      <edge id="2195" label="BIRC2 (pp) MYCBPAP" source="1922" target="1998" cy:directed="1"/>
      <edge id="2194" label="BIRC2 (pp) ULK3" source="1922" target="2145" cy:directed="1"/>
      <edge id="2193" label="BIRC2 (pp) RIPK1" source="1922" target="1964" cy:directed="1"/>
      <edge id="2192" label="BIRC2 (pp) TNIP1" source="1922" target="1954" cy:directed="1"/>
      <edge id="2191" label="BIRC2 (pp) TRAF2" source="1922" target="1973" cy:directed="1"/>
      <edge id="2190" label="BIRC2 (pp) PLEKHB2" source="1922" target="1971" cy:directed="1"/>
      <edge id="2189" label="BIRC2 (pp) HBE1" source="1922" target="2065" cy:directed="1"/>
      <edge id="2188" label="BIRC2 (pp) TRAF3" source="1922" target="1962" cy:directed="1"/>
      <edge id="2187" label="RBCK1 (pp) ATP6AP2" source="1851" target="2039" cy:directed="1"/>
      <edge id="2186" label="RBCK1 (pp) TNIP1" source="1851" target="1954" cy:directed="1"/>
      <edge id="2185" label="RBCK1 (pp) FAM188A" source="1851" target="1956" cy:directed="1"/>
      <edge id="2184" label="RBCK1 (pp) AMOT" source="1851" target="2079" cy:directed="1"/>
      <edge id="2183" label="RBCK1 (pp) ZFAND2B" source="1851" target="1909" cy:directed="1"/>
      <edge id="2182" label="RBCK1 (pp) VPS37D" source="1851" target="1852" cy:directed="1"/>
      <edge id="2181" label="RBCK1 (pp) MFI2" source="1851" target="1847" cy:directed="1"/>
      <edge id="2180" label="RBCK1 (pp) PDPN" source="1851" target="1959" cy:directed="1"/>
      <edge id="2179" label="RBCK1 (pp) RAB9A" source="1851" target="2012" cy:directed="1"/>
      <edge id="2178" label="RBCK1 (pp) DHFR" source="1851" target="2038" cy:directed="1"/>
      <edge id="2177" label="RBCK1 (pp) UEVLD" source="1851" target="1902" cy:directed="1"/>
      <edge id="2176" label="RBCK1 (pp) RNF31" source="1851" target="2127" cy:directed="1"/>
      <edge id="2175" label="RBCK1 (pp) NCS1" source="1851" target="2087" cy:directed="1"/>
      <edge id="2174" label="RBCK1 (pp) SHARPIN" source="1851" target="2159" cy:directed="1"/>
      <edge id="2173" label="RBCK1 (pp) KHNYN" source="1851" target="2089" cy:directed="1"/>
      <edge id="2172" label="RBCK1 (pp) CD82" source="1851" target="2091" cy:directed="1"/>
      <edge id="2171" label="RBCK1 (pp) ULBP3" source="1851" target="2092" cy:directed="1"/>
      <edge id="2170" label="RBCK1 (pp) RNF115" source="1851" target="1952" cy:directed="1"/>
      <edge id="2169" label="RBCK1 (pp) MOXD1" source="1851" target="2101" cy:directed="1"/>
      <edge id="2168" label="RBCK1 (pp) YOD1" source="1851" target="1858" cy:directed="1"/>
      <edge id="2167" label="RBCK1 (pp) ULK3" source="1851" target="2145" cy:directed="1"/>
      <edge id="2166" label="RBCK1 (pp) TNIP2" source="1851" target="1930" cy:directed="1"/>
      <edge id="2165" label="RBCK1 (pp) AP2A2" source="1851" target="1845" cy:directed="1"/>
      <edge id="2164" label="RBCK1 (pp) MSTO1" source="1851" target="1846" cy:directed="1"/>
      <edge id="2163" label="RBCK1 (pp) CAPN15" source="1851" target="1848" cy:directed="1"/>
      <edge id="2162" label="RBCK1 (pp) UBE2V2" source="1851" target="1939" cy:directed="1"/>
      <edge id="2161" label="RBCK1 (pp) UMAD1" source="1851" target="1849" cy:directed="1"/>
      <edge id="2160" label="RBCK1 (pp) TENM3" source="1851" target="1942" cy:directed="1"/>
    </graph>
  </att>
</graph>
