# Supplementary material
Source: publisher figshare collection journal article supplement (https://springernature.figshare.com/ndownloader/files/12998375)
Supplement: Supplementary file 1 [file 12998375 › CytoscapeSession-2018_09_09-12_11/session_vizmap.xml]

<?xml version="1.0" encoding="UTF-8" standalone="yes"?>
<vizmap documentVersion="3.0" id="VizMap-2018_09_09-12_11">
    <visualStyle name="Ripple">
        <network>
            <visualProperty name="NETWORK_WIDTH" default="550.0"/>
            <visualProperty name="NETWORK_CENTER_Z_LOCATION" default="0.0"/>
            <visualProperty name="NETWORK_SCALE_FACTOR" default="1.0"/>
            <visualProperty name="NETWORK_SIZE" default="550.0"/>
            <visualProperty name="NETWORK_BACKGROUND_PAINT" default="#FFFFFF"/>
            <visualProperty name="NETWORK_DEPTH" default="0.0"/>
            <visualProperty name="NETWORK_NODE_SELECTION" default="true"/>
            <visualProperty name="NETWORK_CENTER_X_LOCATION" default="0.0"/>
            <visualProperty name="NETWORK_TITLE" default=""/>
            <visualProperty name="NETWORK_EDGE_SELECTION" default="true"/>
            <visualProperty name="NETWORK_CENTER_Y_LOCATION" default="0.0"/>
            <visualProperty name="NETWORK_HEIGHT" default="400.0"/>
        </network>
        <node>
            <dependency name="nodeSizeLocked" value="true"/>
            <dependency name="nodeCustomGraphicsSizeSync" value="true"/>
            <visualProperty name="NODE_NESTED_NETWORK_IMAGE_VISIBLE" default="true"/>
            <visualProperty name="NODE_CUSTOMPAINT_8" default="DefaultVisualizableVisualProperty(id=NODE_CUSTOMPAINT_8, name=Node Custom Paint 8)"/>
            <visualProperty name="NODE_CUSTOMPAINT_7" default="DefaultVisualizableVisualProperty(id=NODE_CUSTOMPAINT_7, name=Node Custom Paint 7)"/>
            <visualProperty name="NODE_CUSTOMGRAPHICS_SIZE_2" default="50.0"/>
            <visualProperty name="NODE_CUSTOMGRAPHICS_SIZE_6" default="50.0"/>
            <visualProperty name="NODE_BORDER_STROKE" default="SOLID"/>
            <visualProperty name="NODE_CUSTOMGRAPHICS_POSITION_7" default="C,C,c,0.00,0.00"/>
            <visualProperty name="NODE_CUSTOMGRAPHICS_8" default="org.cytoscape.ding.customgraphics.NullCustomGraphics,0,[ Remove Graphics ],"/>
            <visualProperty name="NODE_TRANSPARENCY" default="255"/>
            <visualProperty name="NODE_LABEL_WIDTH" default="200.0"/>
            <visualProperty name="NODE_CUSTOMGRAPHICS_SIZE_1" default="50.0"/>
            <visualProperty name="NODE_CUSTOMGRAPHICS_5" default="org.cytoscape.ding.customgraphics.NullCustomGraphics,0,[ Remove Graphics ],"/>
            <visualProperty name="NODE_PAINT" default="#787878"/>
            <visualProperty name="NODE_CUSTOMGRAPHICS_9" default="org.cytoscape.ding.customgraphics.NullCustomGraphics,0,[ Remove Graphics ],"/>
            <visualProperty name="NODE_CUSTOMGRAPHICS_1" default="org.cytoscape.ding.customgraphics.NullCustomGraphics,0,[ Remove Graphics ],"/>
            <visualProperty name="NODE_CUSTOMPAINT_3" default="DefaultVisualizableVisualProperty(id=NODE_CUSTOMPAINT_3, name=Node Custom Paint 3)"/>
            <visualProperty name="NODE_CUSTOMGRAPHICS_POSITION_6" default="C,C,c,0.00,0.00"/>
            <visualProperty name="NODE_CUSTOMGRAPHICS_POSITION_2" default="C,C,c,0.00,0.00"/>
            <visualProperty name="NODE_CUSTOMPAINT_2" default="DefaultVisualizableVisualProperty(id=NODE_CUSTOMPAINT_2, name=Node Custom Paint 2)"/>
            <visualProperty name="NODE_SELECTED_PAINT" default="#FFFFCC"/>
            <visualProperty name="NODE_CUSTOMPAINT_9" default="DefaultVisualizableVisualProperty(id=NODE_CUSTOMPAINT_9, name=Node Custom Paint 9)"/>
            <visualProperty name="NODE_HEIGHT" default="80.0"/>
            <visualProperty name="NODE_CUSTOMGRAPHICS_POSITION_8" default="C,C,c,0.00,0.00"/>
            <visualProperty name="NODE_CUSTOMGRAPHICS_POSITION_9" default="C,C,c,0.00,0.00"/>
            <visualProperty name="NODE_CUSTOMGRAPHICS_POSITION_1" default="C,C,c,0.00,0.00"/>
            <visualProperty name="NODE_BORDER_TRANSPARENCY" default="255"/>
            <visualProperty name="NODE_CUSTOMGRAPHICS_SIZE_3" default="50.0"/>
            <visualProperty name="NODE_Y_LOCATION" default="0.0"/>
            <visualProperty name="NODE_CUSTOMGRAPHICS_3" default="org.cytoscape.ding.customgraphics.NullCustomGraphics,0,[ Remove Graphics ],"/>
            <visualProperty name="NODE_CUSTOMGRAPHICS_7" default="org.cytoscape.ding.customgraphics.NullCustomGraphics,0,[ Remove Graphics ],"/>
            <visualProperty name="NODE_CUSTOMGRAPHICS_SIZE_7" default="50.0"/>
            <visualProperty name="NODE_CUSTOMGRAPHICS_SIZE_8" default="50.0"/>
            <visualProperty name="NODE_CUSTOMGRAPHICS_POSITION_5" default="C,C,c,0.00,0.00"/>
            <visualProperty name="NODE_SHAPE" default="ELLIPSE"/>
            <visualProperty name="NODE_SELECTED" default="false"/>
            <visualProperty name="NODE_DEPTH" default="0.0"/>
            <visualProperty name="NODE_CUSTOMGRAPHICS_SIZE_5" default="50.0"/>
            <visualProperty name="NODE_FILL_COLOR" default="#FFFFFF"/>
            <visualProperty name="NODE_VISIBLE" default="true"/>
            <visualProperty name="NODE_BORDER_WIDTH" default="30.0"/>
            <visualProperty name="NODE_CUSTOMPAINT_4" default="DefaultVisualizableVisualProperty(id=NODE_CUSTOMPAINT_4, name=Node Custom Paint 4)"/>
            <visualProperty name="NODE_Z_LOCATION" default="0.0"/>
            <visualProperty name="NODE_TOOLTIP" default=""/>
            <visualProperty name="NODE_CUSTOMPAINT_5" default="DefaultVisualizableVisualProperty(id=NODE_CUSTOMPAINT_5, name=Node Custom Paint 5)"/>
            <visualProperty name="NODE_BORDER_PAINT" default="#CCFFFF"/>
            <visualProperty name="NODE_CUSTOMPAINT_6" default="DefaultVisualizableVisualProperty(id=NODE_CUSTOMPAINT_6, name=Node Custom Paint 6)"/>
            <visualProperty name="NODE_X_LOCATION" default="0.0"/>
            <visualProperty name="NODE_CUSTOMGRAPHICS_6" default="org.cytoscape.ding.customgraphics.NullCustomGraphics,0,[ Remove Graphics ],"/>
            <visualProperty name="NODE_WIDTH" default="80.0"/>
            <visualProperty name="NODE_CUSTOMGRAPHICS_POSITION_3" default="C,C,c,0.00,0.00"/>
            <visualProperty name="NODE_CUSTOMPAINT_1" default="DefaultVisualizableVisualProperty(id=NODE_CUSTOMPAINT_1, name=Node Custom Paint 1)"/>
            <visualProperty name="NODE_CUSTOMGRAPHICS_4" default="org.cytoscape.ding.customgraphics.NullCustomGraphics,0,[ Remove Graphics ],"/>
            <visualProperty name="NODE_LABEL_POSITION" default="C,C,c,0.00,0.00"/>
            <visualProperty name="NODE_LABEL_TRANSPARENCY" default="255"/>
            <visualProperty name="NODE_CUSTOMGRAPHICS_SIZE_4" default="50.0"/>
            <visualProperty name="NODE_CUSTOMGRAPHICS_2" default="org.cytoscape.ding.customgraphics.NullCustomGraphics,0,[ Remove Graphics ],"/>
            <visualProperty name="NODE_CUSTOMGRAPHICS_POSITION_4" default="C,C,c,0.00,0.00"/>
            <visualProperty name="NODE_SIZE" default="50.0"/>
            <visualProperty name="NODE_LABEL_FONT_FACE" default="SansSerif.plain,plain,12"/>
            <visualProperty name="NODE_CUSTOMGRAPHICS_SIZE_9" default="50.0"/>
            <visualProperty name="NODE_LABEL_COLOR" default="#666666"/>
            <visualProperty name="NODE_LABEL_FONT_SIZE" default="8"/>
            <visualProperty name="NODE_LABEL" default="">
                <passthroughMapping attributeType="string" attributeName="name"/>
            </visualProperty>
        </node>
        <edge>
            <dependency name="arrowColorMatchesEdge" value="false"/>
            <visualProperty name="EDGE_TOOLTIP" default=""/>
            <visualProperty name="EDGE_PAINT" default="#808080"/>
            <visualProperty name="EDGE_LABEL" default=""/>
            <visualProperty name="EDGE_SOURCE_ARROW_UNSELECTED_PAINT" default="#000000"/>
            <visualProperty name="EDGE_STROKE_SELECTED_PAINT" default="#FF0000"/>
            <visualProperty name="EDGE_TRANSPARENCY" default="255"/>
            <visualProperty name="EDGE_SOURCE_ARROW_SELECTED_PAINT" default="#FFFF00"/>
            <visualProperty name="EDGE_WIDTH" default="3.0"/>
            <visualProperty name="EDGE_STROKE_UNSELECTED_PAINT" default="#66CCFF"/>
            <visualProperty name="EDGE_BEND" default=""/>
            <visualProperty name="EDGE_LABEL_FONT_SIZE" default="10"/>
            <visualProperty name="EDGE_TARGET_ARROW_SHAPE" default="NONE"/>
            <visualProperty name="EDGE_LABEL_TRANSPARENCY" default="255"/>
            <visualProperty name="EDGE_LINE_TYPE" default="SOLID"/>
            <visualProperty name="EDGE_LABEL_FONT_FACE" default="SansSerif.plain,plain,10"/>
            <visualProperty name="EDGE_SELECTED" default="false"/>
            <visualProperty name="EDGE_VISIBLE" default="true"/>
            <visualProperty name="EDGE_SOURCE_ARROW_SHAPE" default="NONE"/>
            <visualProperty name="EDGE_CURVED" default="true"/>
            <visualProperty name="EDGE_LABEL_COLOR" default="#000000"/>
            <visualProperty name="EDGE_UNSELECTED_PAINT" default="#404040"/>
            <visualProperty name="EDGE_SELECTED_PAINT" default="#FF0000"/>
            <visualProperty name="EDGE_TARGET_ARROW_UNSELECTED_PAINT" default="#000000"/>
            <visualProperty name="EDGE_TARGET_ARROW_SELECTED_PAINT" default="#FFFF00"/>
        </edge>
    </visualStyle>
    <visualStyle name="default">
        <network>
            <visualProperty name="NETWORK_WIDTH" default="550.0"/>
            <visualProperty name="NETWORK_CENTER_Z_LOCATION" default="0.0"/>
            <visualProperty name="NETWORK_SCALE_FACTOR" default="1.0"/>
            <visualProperty name="NETWORK_SIZE" default="550.0"/>
            <visualProperty name="NETWORK_BACKGROUND_PAINT" default="#FFFFFF"/>
            <visualProperty name="NETWORK_DEPTH" default="0.0"/>
            <visualProperty name="NETWORK_NODE_SELECTION" default="true"/>
            <visualProperty name="NETWORK_CENTER_X_LOCATION" default="0.0"/>
            <visualProperty name="NETWORK_TITLE" default=""/>
            <visualProperty name="NETWORK_EDGE_SELECTION" default="true"/>
            <visualProperty name="NETWORK_CENTER_Y_LOCATION" default="0.0"/>
            <visualProperty name="NETWORK_HEIGHT" default="400.0"/>
        </network>
        <node>
            <dependency name="nodeCustomGraphicsSizeSync" value="true"/>
            <dependency name="nodeSizeLocked" value="false"/>
            <visualProperty name="NODE_NESTED_NETWORK_IMAGE_VISIBLE" default="true"/>
            <visualProperty name="NODE_CUSTOMPAINT_8" default="DefaultVisualizableVisualProperty(id=NODE_CUSTOMPAINT_8, name=Node Custom Paint 8)"/>
            <visualProperty name="NODE_CUSTOMPAINT_7" default="DefaultVisualizableVisualProperty(id=NODE_CUSTOMPAINT_7, name=Node Custom Paint 7)"/>
            <visualProperty name="NODE_CUSTOMGRAPHICS_SIZE_2" default="50.0"/>
            <visualProperty name="NODE_CUSTOMGRAPHICS_SIZE_6" default="50.0"/>
            <visualProperty name="NODE_BORDER_STROKE" default="SOLID"/>
            <visualProperty name="NODE_CUSTOMGRAPHICS_POSITION_7" default="C,C,c,0.00,0.00"/>
            <visualProperty name="NODE_CUSTOMGRAPHICS_8" default="org.cytoscape.ding.customgraphics.NullCustomGraphics,0,[ Remove Graphics ],"/>
            <visualProperty name="NODE_TRANSPARENCY" default="255"/>
            <visualProperty name="NODE_LABEL_WIDTH" default="200.0"/>
            <visualProperty name="NODE_CUSTOMGRAPHICS_SIZE_1" default="50.0"/>
            <visualProperty name="NODE_CUSTOMGRAPHICS_5" default="org.cytoscape.ding.customgraphics.NullCustomGraphics,0,[ Remove Graphics ],"/>
            <visualProperty name="NODE_PAINT" default="#1E90FF"/>
            <visualProperty name="NODE_CUSTOMGRAPHICS_9" default="org.cytoscape.ding.customgraphics.NullCustomGraphics,0,[ Remove Graphics ],"/>
            <visualProperty name="NODE_CUSTOMGRAPHICS_1" default="org.cytoscape.ding.customgraphics.NullCustomGraphics,0,[ Remove Graphics ],"/>
            <visualProperty name="NODE_CUSTOMPAINT_3" default="DefaultVisualizableVisualProperty(id=NODE_CUSTOMPAINT_3, name=Node Custom Paint 3)"/>
            <visualProperty name="NODE_CUSTOMGRAPHICS_POSITION_6" default="C,C,c,0.00,0.00"/>
            <visualProperty name="NODE_CUSTOMGRAPHICS_POSITION_2" default="C,C,c,0.00,0.00"/>
            <visualProperty name="NODE_CUSTOMPAINT_2" default="DefaultVisualizableVisualProperty(id=NODE_CUSTOMPAINT_2, name=Node Custom Paint 2)"/>
            <visualProperty name="NODE_SELECTED_PAINT" default="#FFFF00"/>
            <visualProperty name="NODE_CUSTOMPAINT_9" default="DefaultVisualizableVisualProperty(id=NODE_CUSTOMPAINT_9, name=Node Custom Paint 9)"/>
            <visualProperty name="NODE_HEIGHT" default="30.0"/>
            <visualProperty name="NODE_CUSTOMGRAPHICS_POSITION_8" default="C,C,c,0.00,0.00"/>
            <visualProperty name="NODE_CUSTOMGRAPHICS_POSITION_9" default="C,C,c,0.00,0.00"/>
            <visualProperty name="NODE_CUSTOMGRAPHICS_POSITION_1" default="C,C,c,0.00,0.00"/>
            <visualProperty name="NODE_BORDER_TRANSPARENCY" default="255"/>
            <visualProperty name="NODE_CUSTOMGRAPHICS_SIZE_3" default="50.0"/>
            <visualProperty name="NODE_Y_LOCATION" default="0.0"/>
            <visualProperty name="NODE_CUSTOMGRAPHICS_3" default="org.cytoscape.ding.customgraphics.NullCustomGraphics,0,[ Remove Graphics ],"/>
            <visualProperty name="NODE_CUSTOMGRAPHICS_7" default="org.cytoscape.ding.customgraphics.NullCustomGraphics,0,[ Remove Graphics ],"/>
            <visualProperty name="NODE_CUSTOMGRAPHICS_SIZE_7" default="50.0"/>
            <visualProperty name="NODE_CUSTOMGRAPHICS_SIZE_8" default="50.0"/>
            <visualProperty name="NODE_CUSTOMGRAPHICS_POSITION_5" default="C,C,c,0.00,0.00"/>
            <visualProperty name="NODE_SHAPE" default="ROUND_RECTANGLE"/>
            <visualProperty name="NODE_SELECTED" default="false"/>
            <visualProperty name="NODE_DEPTH" default="0.0"/>
            <visualProperty name="NODE_CUSTOMGRAPHICS_SIZE_5" default="50.0"/>
            <visualProperty name="NODE_FILL_COLOR" default="#0099CC"/>
            <visualProperty name="NODE_VISIBLE" default="true"/>
            <visualProperty name="NODE_BORDER_WIDTH" default="4.0"/>
            <visualProperty name="NODE_CUSTOMPAINT_4" default="DefaultVisualizableVisualProperty(id=NODE_CUSTOMPAINT_4, name=Node Custom Paint 4)"/>
            <visualProperty name="NODE_Z_LOCATION" default="0.0"/>
            <visualProperty name="NODE_TOOLTIP" default=""/>
            <visualProperty name="NODE_CUSTOMPAINT_5" default="DefaultVisualizableVisualProperty(id=NODE_CUSTOMPAINT_5, name=Node Custom Paint 5)"/>
            <visualProperty name="NODE_BORDER_PAINT" default="#006699"/>
            <visualProperty name="NODE_CUSTOMPAINT_6" default="DefaultVisualizableVisualProperty(id=NODE_CUSTOMPAINT_6, name=Node Custom Paint 6)"/>
            <visualProperty name="NODE_X_LOCATION" default="0.0"/>
            <visualProperty name="NODE_CUSTOMGRAPHICS_6" default="org.cytoscape.ding.customgraphics.NullCustomGraphics,0,[ Remove Graphics ],"/>
            <visualProperty name="NODE_WIDTH" default="70.0"/>
            <visualProperty name="NODE_CUSTOMGRAPHICS_POSITION_3" default="C,C,c,0.00,0.00"/>
            <visualProperty name="NODE_CUSTOMPAINT_1" default="DefaultVisualizableVisualProperty(id=NODE_CUSTOMPAINT_1, name=Node Custom Paint 1)"/>
            <visualProperty name="NODE_CUSTOMGRAPHICS_4" default="org.cytoscape.ding.customgraphics.NullCustomGraphics,0,[ Remove Graphics ],"/>
            <visualProperty name="NODE_LABEL_POSITION" default="C,C,c,0.00,0.00"/>
            <visualProperty name="NODE_LABEL_TRANSPARENCY" default="255"/>
            <visualProperty name="NODE_CUSTOMGRAPHICS_SIZE_4" default="50.0"/>
            <visualProperty name="NODE_CUSTOMGRAPHICS_2" default="org.cytoscape.ding.customgraphics.NullCustomGraphics,0,[ Remove Graphics ],"/>
            <visualProperty name="NODE_CUSTOMGRAPHICS_POSITION_4" default="C,C,c,0.00,0.00"/>
            <visualProperty name="NODE_SIZE" default="35.0"/>
            <visualProperty name="NODE_LABEL_FONT_FACE" default="Dialog.plain,plain,12"/>
            <visualProperty name="NODE_CUSTOMGRAPHICS_SIZE_9" default="50.0"/>
            <visualProperty name="NODE_LABEL_COLOR" default="#FFFFFF"/>
            <visualProperty name="NODE_LABEL_FONT_SIZE" default="12"/>
            <visualProperty name="NODE_LABEL" default="">
                <passthroughMapping attributeType="string" attributeName="name"/>
            </visualProperty>
        </node>
        <edge>
            <dependency name="arrowColorMatchesEdge" value="false"/>
            <visualProperty name="EDGE_TOOLTIP" default=""/>
            <visualProperty name="EDGE_PAINT" default="#323232"/>
            <visualProperty name="EDGE_LABEL" default=""/>
            <visualProperty name="EDGE_SOURCE_ARROW_UNSELECTED_PAINT" default="#000000"/>
            <visualProperty name="EDGE_STROKE_SELECTED_PAINT" default="#FF0000"/>
            <visualProperty name="EDGE_TRANSPARENCY" default="255"/>
            <visualProperty name="EDGE_SOURCE_ARROW_SELECTED_PAINT" default="#FFFF00"/>
            <visualProperty name="EDGE_WIDTH" default="3.0"/>
            <visualProperty name="EDGE_STROKE_UNSELECTED_PAINT" default="#666666"/>
            <visualProperty name="EDGE_BEND" default=""/>
            <visualProperty name="EDGE_LABEL_FONT_SIZE" default="10"/>
            <visualProperty name="EDGE_TARGET_ARROW_SHAPE" default="NONE"/>
            <visualProperty name="EDGE_LABEL_TRANSPARENCY" default="255"/>
            <visualProperty name="EDGE_LINE_TYPE" default="SOLID"/>
            <visualProperty name="EDGE_LABEL_FONT_FACE" default="Dialog.plain,plain,10"/>
            <visualProperty name="EDGE_SELECTED" default="false"/>
            <visualProperty name="EDGE_VISIBLE" default="true"/>
            <visualProperty name="EDGE_SOURCE_ARROW_SHAPE" default="NONE"/>
            <visualProperty name="EDGE_CURVED" default="true"/>
            <visualProperty name="EDGE_LABEL_COLOR" default="#000000"/>
            <visualProperty name="EDGE_UNSELECTED_PAINT" default="#404040"/>
            <visualProperty name="EDGE_SELECTED_PAINT" default="#FF0000"/>
            <visualProperty name="EDGE_TARGET_ARROW_UNSELECTED_PAINT" default="#000000"/>
            <visualProperty name="EDGE_TARGET_ARROW_SELECTED_PAINT" default="#FFFF00"/>
        </edge>
    </visualStyle>
    <visualStyle name="default black">
        <network>
            <visualProperty name="NETWORK_WIDTH" default="550.0"/>
            <visualProperty name="NETWORK_CENTER_Z_LOCATION" default="0.0"/>
            <visualProperty name="NETWORK_SCALE_FACTOR" default="1.0"/>
            <visualProperty name="NETWORK_SIZE" default="550.0"/>
            <visualProperty name="NETWORK_BACKGROUND_PAINT" default="#000000"/>
            <visualProperty name="NETWORK_DEPTH" default="0.0"/>
            <visualProperty name="NETWORK_NODE_SELECTION" default="true"/>
            <visualProperty name="NETWORK_CENTER_X_LOCATION" default="0.0"/>
            <visualProperty name="NETWORK_TITLE" default=""/>
            <visualProperty name="NETWORK_EDGE_SELECTION" default="true"/>
            <visualProperty name="NETWORK_CENTER_Y_LOCATION" default="0.0"/>
            <visualProperty name="NETWORK_HEIGHT" default="400.0"/>
        </network>
        <node>
            <dependency name="nodeCustomGraphicsSizeSync" value="true"/>
            <dependency name="nodeSizeLocked" value="true"/>
            <visualProperty name="NODE_NESTED_NETWORK_IMAGE_VISIBLE" default="true"/>
            <visualProperty name="NODE_CUSTOMPAINT_8" default="DefaultVisualizableVisualProperty(id=NODE_CUSTOMPAINT_8, name=Node Custom Paint 8)"/>
            <visualProperty name="NODE_CUSTOMPAINT_7" default="DefaultVisualizableVisualProperty(id=NODE_CUSTOMPAINT_7, name=Node Custom Paint 7)"/>
            <visualProperty name="NODE_CUSTOMGRAPHICS_SIZE_2" default="50.0"/>
            <visualProperty name="NODE_CUSTOMGRAPHICS_SIZE_6" default="50.0"/>
            <visualProperty name="NODE_BORDER_STROKE" default="SOLID"/>
            <visualProperty name="NODE_CUSTOMGRAPHICS_POSITION_7" default="C,C,c,0.00,0.00"/>
            <visualProperty name="NODE_CUSTOMGRAPHICS_8" default="org.cytoscape.ding.customgraphics.NullCustomGraphics,0,[ Remove Graphics ],"/>
            <visualProperty name="NODE_TRANSPARENCY" default="255"/>
            <visualProperty name="NODE_LABEL_WIDTH" default="200.0"/>
            <visualProperty name="NODE_CUSTOMGRAPHICS_SIZE_1" default="50.0"/>
            <visualProperty name="NODE_CUSTOMGRAPHICS_5" default="org.cytoscape.ding.customgraphics.NullCustomGraphics,0,[ Remove Graphics ],"/>
            <visualProperty name="NODE_PAINT" default="#1E90FF"/>
            <visualProperty name="NODE_CUSTOMGRAPHICS_9" default="org.cytoscape.ding.customgraphics.NullCustomGraphics,0,[ Remove Graphics ],"/>
            <visualProperty name="NODE_CUSTOMGRAPHICS_1" default="org.cytoscape.ding.customgraphics.NullCustomGraphics,0,[ Remove Graphics ],"/>
            <visualProperty name="NODE_CUSTOMPAINT_3" default="DefaultVisualizableVisualProperty(id=NODE_CUSTOMPAINT_3, name=Node Custom Paint 3)"/>
            <visualProperty name="NODE_CUSTOMGRAPHICS_POSITION_6" default="C,C,c,0.00,0.00"/>
            <visualProperty name="NODE_CUSTOMGRAPHICS_POSITION_2" default="C,C,c,0.00,0.00"/>
            <visualProperty name="NODE_CUSTOMPAINT_2" default="DefaultVisualizableVisualProperty(id=NODE_CUSTOMPAINT_2, name=Node Custom Paint 2)"/>
            <visualProperty name="NODE_SELECTED_PAINT" default="#FFFF00"/>
            <visualProperty name="NODE_CUSTOMPAINT_9" default="DefaultVisualizableVisualProperty(id=NODE_CUSTOMPAINT_9, name=Node Custom Paint 9)"/>
            <visualProperty name="NODE_HEIGHT" default="30.0"/>
            <visualProperty name="NODE_CUSTOMGRAPHICS_POSITION_8" default="C,C,c,0.00,0.00"/>
            <visualProperty name="NODE_CUSTOMGRAPHICS_POSITION_9" default="C,C,c,0.00,0.00"/>
            <visualProperty name="NODE_CUSTOMGRAPHICS_POSITION_1" default="C,C,c,0.00,0.00"/>
            <visualProperty name="NODE_BORDER_TRANSPARENCY" default="255"/>
            <visualProperty name="NODE_CUSTOMGRAPHICS_SIZE_3" default="50.0"/>
            <visualProperty name="NODE_Y_LOCATION" default="0.0"/>
            <visualProperty name="NODE_CUSTOMGRAPHICS_3" default="org.cytoscape.ding.customgraphics.NullCustomGraphics,0,[ Remove Graphics ],"/>
            <visualProperty name="NODE_CUSTOMGRAPHICS_7" default="org.cytoscape.ding.customgraphics.NullCustomGraphics,0,[ Remove Graphics ],"/>
            <visualProperty name="NODE_CUSTOMGRAPHICS_SIZE_7" default="50.0"/>
            <visualProperty name="NODE_CUSTOMGRAPHICS_SIZE_8" default="50.0"/>
            <visualProperty name="NODE_CUSTOMGRAPHICS_POSITION_5" default="C,C,c,0.00,0.00"/>
            <visualProperty name="NODE_SHAPE" default="ELLIPSE"/>
            <visualProperty name="NODE_SELECTED" default="false"/>
            <visualProperty name="NODE_DEPTH" default="0.0"/>
            <visualProperty name="NODE_CUSTOMGRAPHICS_SIZE_5" default="50.0"/>
            <visualProperty name="NODE_FILL_COLOR" default="#FFFFFF"/>
            <visualProperty name="NODE_VISIBLE" default="true"/>
            <visualProperty name="NODE_BORDER_WIDTH" default="0.0"/>
            <visualProperty name="NODE_CUSTOMPAINT_4" default="DefaultVisualizableVisualProperty(id=NODE_CUSTOMPAINT_4, name=Node Custom Paint 4)"/>
            <visualProperty name="NODE_Z_LOCATION" default="0.0"/>
            <visualProperty name="NODE_TOOLTIP" default=""/>
            <visualProperty name="NODE_CUSTOMPAINT_5" default="DefaultVisualizableVisualProperty(id=NODE_CUSTOMPAINT_5, name=Node Custom Paint 5)"/>
            <visualProperty name="NODE_BORDER_PAINT" default="#009900"/>
            <visualProperty name="NODE_CUSTOMPAINT_6" default="DefaultVisualizableVisualProperty(id=NODE_CUSTOMPAINT_6, name=Node Custom Paint 6)"/>
            <visualProperty name="NODE_X_LOCATION" default="0.0"/>
            <visualProperty name="NODE_CUSTOMGRAPHICS_6" default="org.cytoscape.ding.customgraphics.NullCustomGraphics,0,[ Remove Graphics ],"/>
            <visualProperty name="NODE_WIDTH" default="70.0"/>
            <visualProperty name="NODE_CUSTOMGRAPHICS_POSITION_3" default="C,C,c,0.00,0.00"/>
            <visualProperty name="NODE_CUSTOMPAINT_1" default="DefaultVisualizableVisualProperty(id=NODE_CUSTOMPAINT_1, name=Node Custom Paint 1)"/>
            <visualProperty name="NODE_CUSTOMGRAPHICS_4" default="org.cytoscape.ding.customgraphics.NullCustomGraphics,0,[ Remove Graphics ],"/>
            <visualProperty name="NODE_LABEL_POSITION" default="S,NW,c,0.00,0.00"/>
            <visualProperty name="NODE_LABEL_TRANSPARENCY" default="255"/>
            <visualProperty name="NODE_CUSTOMGRAPHICS_SIZE_4" default="50.0"/>
            <visualProperty name="NODE_CUSTOMGRAPHICS_2" default="org.cytoscape.ding.customgraphics.NullCustomGraphics,0,[ Remove Graphics ],"/>
            <visualProperty name="NODE_CUSTOMGRAPHICS_POSITION_4" default="C,C,c,0.00,0.00"/>
            <visualProperty name="NODE_SIZE" default="15.0"/>
            <visualProperty name="NODE_LABEL_FONT_FACE" default="Dialog.plain,plain,12"/>
            <visualProperty name="NODE_CUSTOMGRAPHICS_SIZE_9" default="50.0"/>
            <visualProperty name="NODE_LABEL_COLOR" default="#CCCCCC"/>
            <visualProperty name="NODE_LABEL_FONT_SIZE" default="12"/>
            <visualProperty name="NODE_LABEL" default="">
                <passthroughMapping attributeType="string" attributeName="name"/>
            </visualProperty>
        </node>
        <edge>
            <dependency name="arrowColorMatchesEdge" value="false"/>
            <visualProperty name="EDGE_TOOLTIP" default=""/>
            <visualProperty name="EDGE_PAINT" default="#323232"/>
            <visualProperty name="EDGE_LABEL" default=""/>
            <visualProperty name="EDGE_SOURCE_ARROW_UNSELECTED_PAINT" default="#000000"/>
            <visualProperty name="EDGE_STROKE_SELECTED_PAINT" default="#FF0000"/>
            <visualProperty name="EDGE_TRANSPARENCY" default="255"/>
            <visualProperty name="EDGE_SOURCE_ARROW_SELECTED_PAINT" default="#FFFF00"/>
            <visualProperty name="EDGE_WIDTH" default="2.0"/>
            <visualProperty name="EDGE_STROKE_UNSELECTED_PAINT" default="#009900"/>
            <visualProperty name="EDGE_BEND" default=""/>
            <visualProperty name="EDGE_LABEL_FONT_SIZE" default="10"/>
            <visualProperty name="EDGE_TARGET_ARROW_SHAPE" default="NONE"/>
            <visualProperty name="EDGE_LABEL_TRANSPARENCY" default="255"/>
            <visualProperty name="EDGE_LINE_TYPE" default="SOLID"/>
            <visualProperty name="EDGE_LABEL_FONT_FACE" default="Dialog.plain,plain,10"/>
            <visualProperty name="EDGE_SELECTED" default="false"/>
            <visualProperty name="EDGE_VISIBLE" default="true"/>
            <visualProperty name="EDGE_SOURCE_ARROW_SHAPE" default="NONE"/>
            <visualProperty name="EDGE_CURVED" default="true"/>
            <visualProperty name="EDGE_LABEL_COLOR" default="#000000"/>
            <visualProperty name="EDGE_UNSELECTED_PAINT" default="#404040"/>
            <visualProperty name="EDGE_SELECTED_PAINT" default="#FF0000"/>
            <visualProperty name="EDGE_TARGET_ARROW_UNSELECTED_PAINT" default="#000000"/>
            <visualProperty name="EDGE_TARGET_ARROW_SELECTED_PAINT" default="#FFFF00"/>
        </edge>
    </visualStyle>
    <visualStyle name="Nested Network Style">
        <network>
            <visualProperty name="NETWORK_WIDTH" default="550.0"/>
            <visualProperty name="NETWORK_CENTER_Z_LOCATION" default="0.0"/>
            <visualProperty name="NETWORK_SCALE_FACTOR" default="1.0"/>
            <visualProperty name="NETWORK_BACKGROUND_PAINT" default="#FFFFFF"/>
            <visualProperty name="NETWORK_DEPTH" default="0.0"/>
            <visualProperty name="NETWORK_NODE_SELECTION" default="true"/>
            <visualProperty name="NETWORK_CENTER_X_LOCATION" default="0.0"/>
            <visualProperty name="NETWORK_TITLE" default=""/>
            <visualProperty name="NETWORK_EDGE_SELECTION" default="true"/>
            <visualProperty name="NETWORK_CENTER_Y_LOCATION" default="0.0"/>
            <visualProperty name="NETWORK_HEIGHT" default="400.0"/>
        </network>
        <node>
            <dependency name="nodeCustomGraphicsSizeSync" value="false"/>
            <dependency name="nodeSizeLocked" value="false"/>
            <visualProperty name="NODE_NESTED_NETWORK_IMAGE_VISIBLE" default="true"/>
            <visualProperty name="NODE_CUSTOMGRAPHICS_SIZE_2" default="50.0"/>
            <visualProperty name="NODE_CUSTOMGRAPHICS_SIZE_6" default="50.0"/>
            <visualProperty name="NODE_BORDER_STROKE" default="SOLID"/>
            <visualProperty name="NODE_CUSTOMGRAPHICS_POSITION_7" default="C,C,c,0.00,0.00"/>
            <visualProperty name="NODE_CUSTOMGRAPHICS_8" default="org.cytoscape.ding.customgraphics.NullCustomGraphics,0,[ Remove Graphics ],"/>
            <visualProperty name="NODE_TRANSPARENCY" default="255"/>
            <visualProperty name="NODE_LABEL_WIDTH" default="200.0"/>
            <visualProperty name="NODE_CUSTOMGRAPHICS_SIZE_1" default="50.0"/>
            <visualProperty name="NODE_CUSTOMGRAPHICS_5" default="org.cytoscape.ding.customgraphics.NullCustomGraphics,0,[ Remove Graphics ],"/>
            <visualProperty name="NODE_CUSTOMGRAPHICS_9" default="org.cytoscape.ding.customgraphics.NullCustomGraphics,0,[ Remove Graphics ],"/>
            <visualProperty name="NODE_CUSTOMGRAPHICS_1" default="org.cytoscape.ding.customgraphics.NullCustomGraphics,0,[ Remove Graphics ],"/>
            <visualProperty name="NODE_CUSTOMGRAPHICS_POSITION_6" default="C,C,c,0.00,0.00"/>
            <visualProperty name="NODE_CUSTOMGRAPHICS_POSITION_2" default="C,C,c,0.00,0.00"/>
            <visualProperty name="NODE_SELECTED_PAINT" default="#FFFF00"/>
            <visualProperty name="NODE_HEIGHT" default="40.0"/>
            <visualProperty name="NODE_CUSTOMGRAPHICS_POSITION_8" default="C,C,c,0.00,0.00"/>
            <visualProperty name="NODE_CUSTOMGRAPHICS_POSITION_9" default="C,C,c,0.00,0.00"/>
            <visualProperty name="NODE_CUSTOMGRAPHICS_POSITION_1" default="C,C,c,0.00,0.00"/>
            <visualProperty name="NODE_BORDER_TRANSPARENCY" default="255"/>
            <visualProperty name="NODE_CUSTOMGRAPHICS_SIZE_3" default="50.0"/>
            <visualProperty name="NODE_Y_LOCATION" default="0.0"/>
            <visualProperty name="NODE_CUSTOMGRAPHICS_3" default="org.cytoscape.ding.customgraphics.NullCustomGraphics,0,[ Remove Graphics ],"/>
            <visualProperty name="NODE_CUSTOMGRAPHICS_7" default="org.cytoscape.ding.customgraphics.NullCustomGraphics,0,[ Remove Graphics ],"/>
            <visualProperty name="NODE_CUSTOMGRAPHICS_SIZE_7" default="50.0"/>
            <visualProperty name="NODE_CUSTOMGRAPHICS_SIZE_8" default="50.0"/>
            <visualProperty name="NODE_CUSTOMGRAPHICS_POSITION_5" default="C,C,c,0.00,0.00"/>
            <visualProperty name="NODE_SHAPE" default="ELLIPSE">
                <discreteMapping attributeType="boolean" attributeName="has_nested_network">
                    <discreteMappingEntry value="RECTANGLE" attributeValue="true"/>
                </discreteMapping>
            </visualProperty>
            <visualProperty name="NODE_SELECTED" default="false"/>
            <visualProperty name="NODE_DEPTH" default="0.0"/>
            <visualProperty name="NODE_CUSTOMGRAPHICS_SIZE_5" default="50.0"/>
            <visualProperty name="NODE_FILL_COLOR" default="#C80000">
                <discreteMapping attributeType="boolean" attributeName="has_nested_network">
                    <discreteMappingEntry value="#FFFFFF" attributeValue="true"/>
                </discreteMapping>
            </visualProperty>
            <visualProperty name="NODE_VISIBLE" default="true"/>
            <visualProperty name="NODE_BORDER_WIDTH" default="2.0">
                <discreteMapping attributeType="boolean" attributeName="has_nested_network"/>
            </visualProperty>
            <visualProperty name="NODE_Z_LOCATION" default="0.0"/>
            <visualProperty name="NODE_TOOLTIP" default=""/>
            <visualProperty name="NODE_BORDER_PAINT" default="#000000">
                <discreteMapping attributeType="boolean" attributeName="has_nested_network">
                    <discreteMappingEntry value="#0066CC" attributeValue="true"/>
                </discreteMapping>
            </visualProperty>
            <visualProperty name="NODE_X_LOCATION" default="0.0"/>
            <visualProperty name="NODE_CUSTOMGRAPHICS_6" default="org.cytoscape.ding.customgraphics.NullCustomGraphics,0,[ Remove Graphics ],"/>
            <visualProperty name="NODE_WIDTH" default="60.0"/>
            <visualProperty name="NODE_CUSTOMGRAPHICS_POSITION_3" default="C,C,c,0.00,0.00"/>
            <visualProperty name="NODE_CUSTOMGRAPHICS_4" default="org.cytoscape.ding.customgraphics.NullCustomGraphics,0,[ Remove Graphics ],"/>
            <visualProperty name="NODE_LABEL_POSITION" default="C,C,c,0.00,0.00">
                <discreteMapping attributeType="boolean" attributeName="has_nested_network">
                    <discreteMappingEntry value="SE,NW,c,0.00,0.00" attributeValue="true"/>
                </discreteMapping>
            </visualProperty>
            <visualProperty name="NODE_LABEL_TRANSPARENCY" default="255"/>
            <visualProperty name="NODE_CUSTOMGRAPHICS_SIZE_4" default="50.0"/>
            <visualProperty name="NODE_CUSTOMGRAPHICS_2" default="org.cytoscape.ding.customgraphics.NullCustomGraphics,0,[ Remove Graphics ],"/>
            <visualProperty name="NODE_CUSTOMGRAPHICS_POSITION_4" default="C,C,c,0.00,0.00"/>
            <visualProperty name="NODE_LABEL_FONT_FACE" default="SansSerif.plain,plain,12"/>
            <visualProperty name="NODE_CUSTOMGRAPHICS_SIZE_9" default="50.0"/>
            <visualProperty name="NODE_LABEL_COLOR" default="#000000">
                <discreteMapping attributeType="boolean" attributeName="has_nested_network">
                    <discreteMappingEntry value="#0066CC" attributeValue="true"/>
                </discreteMapping>
            </visualProperty>
            <visualProperty name="NODE_LABEL_FONT_SIZE" default="12"/>
            <visualProperty name="NODE_LABEL" default="">
                <passthroughMapping attributeType="string" attributeName="shared name"/>
            </visualProperty>
        </node>
        <edge>
            <dependency name="arrowColorMatchesEdge" value="false"/>
            <visualProperty name="EDGE_TOOLTIP" default=""/>
            <visualProperty name="EDGE_LABEL" default=""/>
            <visualProperty name="EDGE_SOURCE_ARROW_UNSELECTED_PAINT" default="#000000"/>
            <visualProperty name="EDGE_STROKE_SELECTED_PAINT" default="#FF0000"/>
            <visualProperty name="EDGE_TRANSPARENCY" default="255"/>
            <visualProperty name="EDGE_SOURCE_ARROW_SELECTED_PAINT" default="#FFFF00"/>
            <visualProperty name="EDGE_WIDTH" default="1.0"/>
            <visualProperty name="EDGE_STROKE_UNSELECTED_PAINT" default="#404040"/>
            <visualProperty name="EDGE_LABEL_FONT_SIZE" default="10"/>
            <visualProperty name="EDGE_TARGET_ARROW_SHAPE" default="NONE"/>
            <visualProperty name="EDGE_LABEL_TRANSPARENCY" default="255"/>
            <visualProperty name="EDGE_LINE_TYPE" default="SOLID"/>
            <visualProperty name="EDGE_LABEL_FONT_FACE" default="SansSerif.plain,plain,10"/>
            <visualProperty name="EDGE_SELECTED" default="false"/>
            <visualProperty name="EDGE_VISIBLE" default="true"/>
            <visualProperty name="EDGE_SOURCE_ARROW_SHAPE" default="NONE"/>
            <visualProperty name="EDGE_CURVED" default="true"/>
            <visualProperty name="EDGE_LABEL_COLOR" default="#000000"/>
            <visualProperty name="EDGE_TARGET_ARROW_UNSELECTED_PAINT" default="#000000"/>
            <visualProperty name="EDGE_TARGET_ARROW_SELECTED_PAINT" default="#FFFF00"/>
        </edge>
    </visualStyle>
    <visualStyle name="Solid">
        <network>
            <visualProperty name="NETWORK_WIDTH" default="550.0"/>
            <visualProperty name="NETWORK_CENTER_Z_LOCATION" default="0.0"/>
            <visualProperty name="NETWORK_SCALE_FACTOR" default="1.0"/>
            <visualProperty name="NETWORK_SIZE" default="550.0"/>
            <visualProperty name="NETWORK_BACKGROUND_PAINT" default="#FFFFFF"/>
            <visualProperty name="NETWORK_DEPTH" default="0.0"/>
            <visualProperty name="NETWORK_NODE_SELECTION" default="true"/>
            <visualProperty name="NETWORK_CENTER_X_LOCATION" default="0.0"/>
            <visualProperty name="NETWORK_TITLE" default=""/>
            <visualProperty name="NETWORK_EDGE_SELECTION" default="true"/>
            <visualProperty name="NETWORK_CENTER_Y_LOCATION" default="0.0"/>
            <visualProperty name="NETWORK_HEIGHT" default="400.0"/>
        </network>
        <node>
            <dependency name="nodeSizeLocked" value="true"/>
            <dependency name="nodeCustomGraphicsSizeSync" value="true"/>
            <visualProperty name="NODE_NESTED_NETWORK_IMAGE_VISIBLE" default="true"/>
            <visualProperty name="NODE_CUSTOMPAINT_8" default="DefaultVisualizableVisualProperty(id=NODE_CUSTOMPAINT_8, name=Node Custom Paint 8)"/>
            <visualProperty name="NODE_CUSTOMPAINT_7" default="DefaultVisualizableVisualProperty(id=NODE_CUSTOMPAINT_7, name=Node Custom Paint 7)"/>
            <visualProperty name="NODE_CUSTOMGRAPHICS_SIZE_2" default="50.0"/>
            <visualProperty name="NODE_CUSTOMGRAPHICS_SIZE_6" default="50.0"/>
            <visualProperty name="NODE_BORDER_STROKE" default="SOLID"/>
            <visualProperty name="NODE_CUSTOMGRAPHICS_POSITION_7" default="C,C,c,0.00,0.00"/>
            <visualProperty name="NODE_CUSTOMGRAPHICS_8" default="org.cytoscape.ding.customgraphics.NullCustomGraphics,0,[ Remove Graphics ],"/>
            <visualProperty name="NODE_TRANSPARENCY" default="255"/>
            <visualProperty name="NODE_LABEL_WIDTH" default="200.0"/>
            <visualProperty name="NODE_CUSTOMGRAPHICS_SIZE_1" default="50.0"/>
            <visualProperty name="NODE_CUSTOMGRAPHICS_5" default="org.cytoscape.ding.customgraphics.NullCustomGraphics,0,[ Remove Graphics ],"/>
            <visualProperty name="NODE_PAINT" default="#787878"/>
            <visualProperty name="NODE_CUSTOMGRAPHICS_9" default="org.cytoscape.ding.customgraphics.NullCustomGraphics,0,[ Remove Graphics ],"/>
            <visualProperty name="NODE_CUSTOMGRAPHICS_1" default="org.cytoscape.ding.customgraphics.NullCustomGraphics,0,[ Remove Graphics ],"/>
            <visualProperty name="NODE_CUSTOMPAINT_3" default="DefaultVisualizableVisualProperty(id=NODE_CUSTOMPAINT_3, name=Node Custom Paint 3)"/>
            <visualProperty name="NODE_CUSTOMGRAPHICS_POSITION_6" default="C,C,c,0.00,0.00"/>
            <visualProperty name="NODE_CUSTOMGRAPHICS_POSITION_2" default="C,C,c,0.00,0.00"/>
            <visualProperty name="NODE_CUSTOMPAINT_2" default="DefaultVisualizableVisualProperty(id=NODE_CUSTOMPAINT_2, name=Node Custom Paint 2)"/>
            <visualProperty name="NODE_SELECTED_PAINT" default="#FFFF00"/>
            <visualProperty name="NODE_CUSTOMPAINT_9" default="DefaultVisualizableVisualProperty(id=NODE_CUSTOMPAINT_9, name=Node Custom Paint 9)"/>
            <visualProperty name="NODE_HEIGHT" default="70.0"/>
            <visualProperty name="NODE_CUSTOMGRAPHICS_POSITION_8" default="C,C,c,0.00,0.00"/>
            <visualProperty name="NODE_CUSTOMGRAPHICS_POSITION_9" default="C,C,c,0.00,0.00"/>
            <visualProperty name="NODE_CUSTOMGRAPHICS_POSITION_1" default="C,C,c,0.00,0.00"/>
            <visualProperty name="NODE_BORDER_TRANSPARENCY" default="255"/>
            <visualProperty name="NODE_CUSTOMGRAPHICS_SIZE_3" default="50.0"/>
            <visualProperty name="NODE_Y_LOCATION" default="0.0"/>
            <visualProperty name="NODE_CUSTOMGRAPHICS_3" default="org.cytoscape.ding.customgraphics.NullCustomGraphics,0,[ Remove Graphics ],"/>
            <visualProperty name="NODE_CUSTOMGRAPHICS_7" default="org.cytoscape.ding.customgraphics.NullCustomGraphics,0,[ Remove Graphics ],"/>
            <visualProperty name="NODE_CUSTOMGRAPHICS_SIZE_7" default="50.0"/>
            <visualProperty name="NODE_CUSTOMGRAPHICS_SIZE_8" default="50.0"/>
            <visualProperty name="NODE_CUSTOMGRAPHICS_POSITION_5" default="C,C,c,0.00,0.00"/>
            <visualProperty name="NODE_SHAPE" default="ELLIPSE"/>
            <visualProperty name="NODE_SELECTED" default="false"/>
            <visualProperty name="NODE_DEPTH" default="0.0"/>
            <visualProperty name="NODE_CUSTOMGRAPHICS_SIZE_5" default="50.0"/>
            <visualProperty name="NODE_FILL_COLOR" default="#999999"/>
            <visualProperty name="NODE_VISIBLE" default="true"/>
            <visualProperty name="NODE_BORDER_WIDTH" default="0.0"/>
            <visualProperty name="NODE_CUSTOMPAINT_4" default="DefaultVisualizableVisualProperty(id=NODE_CUSTOMPAINT_4, name=Node Custom Paint 4)"/>
            <visualProperty name="NODE_Z_LOCATION" default="0.0"/>
            <visualProperty name="NODE_TOOLTIP" default=""/>
            <visualProperty name="NODE_CUSTOMPAINT_5" default="DefaultVisualizableVisualProperty(id=NODE_CUSTOMPAINT_5, name=Node Custom Paint 5)"/>
            <visualProperty name="NODE_BORDER_PAINT" default="#000000"/>
            <visualProperty name="NODE_CUSTOMPAINT_6" default="DefaultVisualizableVisualProperty(id=NODE_CUSTOMPAINT_6, name=Node Custom Paint 6)"/>
            <visualProperty name="NODE_X_LOCATION" default="0.0"/>
            <visualProperty name="NODE_CUSTOMGRAPHICS_6" default="org.cytoscape.ding.customgraphics.NullCustomGraphics,0,[ Remove Graphics ],"/>
            <visualProperty name="NODE_WIDTH" default="70.0"/>
            <visualProperty name="NODE_CUSTOMGRAPHICS_POSITION_3" default="C,C,c,0.00,0.00"/>
            <visualProperty name="NODE_CUSTOMPAINT_1" default="DefaultVisualizableVisualProperty(id=NODE_CUSTOMPAINT_1, name=Node Custom Paint 1)"/>
            <visualProperty name="NODE_CUSTOMGRAPHICS_4" default="org.cytoscape.ding.customgraphics.NullCustomGraphics,0,[ Remove Graphics ],"/>
            <visualProperty name="NODE_LABEL_POSITION" default="C,C,c,0.00,0.00"/>
            <visualProperty name="NODE_LABEL_TRANSPARENCY" default="255"/>
            <visualProperty name="NODE_CUSTOMGRAPHICS_SIZE_4" default="50.0"/>
            <visualProperty name="NODE_CUSTOMGRAPHICS_2" default="org.cytoscape.ding.customgraphics.NullCustomGraphics,0,[ Remove Graphics ],"/>
            <visualProperty name="NODE_CUSTOMGRAPHICS_POSITION_4" default="C,C,c,0.00,0.00"/>
            <visualProperty name="NODE_SIZE" default="40.0"/>
            <visualProperty name="NODE_LABEL_FONT_FACE" default="Dialog.plain,plain,12"/>
            <visualProperty name="NODE_CUSTOMGRAPHICS_SIZE_9" default="50.0"/>
            <visualProperty name="NODE_LABEL_COLOR" default="#000000"/>
            <visualProperty name="NODE_LABEL_FONT_SIZE" default="14"/>
            <visualProperty name="NODE_LABEL" default="">
                <passthroughMapping attributeType="string" attributeName="name"/>
            </visualProperty>
        </node>
        <edge>
            <dependency name="arrowColorMatchesEdge" value="false"/>
            <visualProperty name="EDGE_TOOLTIP" default=""/>
            <visualProperty name="EDGE_PAINT" default="#323232"/>
            <visualProperty name="EDGE_LABEL" default="">
                <passthroughMapping attributeType="string" attributeName="interaction"/>
            </visualProperty>
            <visualProperty name="EDGE_SOURCE_ARROW_UNSELECTED_PAINT" default="#000000"/>
            <visualProperty name="EDGE_STROKE_SELECTED_PAINT" default="#FF0000"/>
            <visualProperty name="EDGE_TRANSPARENCY" default="255"/>
            <visualProperty name="EDGE_SOURCE_ARROW_SELECTED_PAINT" default="#FFFF00"/>
            <visualProperty name="EDGE_WIDTH" default="12.0"/>
            <visualProperty name="EDGE_STROKE_UNSELECTED_PAINT" default="#CCCCCC"/>
            <visualProperty name="EDGE_BEND" default=""/>
            <visualProperty name="EDGE_LABEL_FONT_SIZE" default="10"/>
            <visualProperty name="EDGE_TARGET_ARROW_SHAPE" default="NONE"/>
            <visualProperty name="EDGE_LABEL_TRANSPARENCY" default="255"/>
            <visualProperty name="EDGE_LINE_TYPE" default="SOLID"/>
            <visualProperty name="EDGE_LABEL_FONT_FACE" default="Dialog.plain,plain,10"/>
            <visualProperty name="EDGE_SELECTED" default="false"/>
            <visualProperty name="EDGE_VISIBLE" default="true"/>
            <visualProperty name="EDGE_SOURCE_ARROW_SHAPE" default="NONE"/>
            <visualProperty name="EDGE_CURVED" default="true"/>
            <visualProperty name="EDGE_LABEL_COLOR" default="#000000"/>
            <visualProperty name="EDGE_UNSELECTED_PAINT" default="#404040"/>
            <visualProperty name="EDGE_SELECTED_PAINT" default="#FF0000"/>
            <visualProperty name="EDGE_TARGET_ARROW_UNSELECTED_PAINT" default="#000000"/>
            <visualProperty name="EDGE_TARGET_ARROW_SELECTED_PAINT" default="#FFFF00"/>
        </edge>
    </visualStyle>
    <visualStyle name="Universe">
        <network>
            <visualProperty name="NETWORK_WIDTH" default="550.0"/>
            <visualProperty name="NETWORK_CENTER_Z_LOCATION" default="0.0"/>
            <visualProperty name="NETWORK_SCALE_FACTOR" default="1.0"/>
            <visualProperty name="NETWORK_SIZE" default="550.0"/>
            <visualProperty name="NETWORK_BACKGROUND_PAINT" default="#000000"/>
            <visualProperty name="NETWORK_DEPTH" default="0.0"/>
            <visualProperty name="NETWORK_NODE_SELECTION" default="true"/>
            <visualProperty name="NETWORK_CENTER_X_LOCATION" default="0.0"/>
            <visualProperty name="NETWORK_TITLE" default=""/>
            <visualProperty name="NETWORK_EDGE_SELECTION" default="true"/>
            <visualProperty name="NETWORK_CENTER_Y_LOCATION" default="0.0"/>
            <visualProperty name="NETWORK_HEIGHT" default="400.0"/>
        </network>
        <node>
            <dependency name="nodeCustomGraphicsSizeSync" value="true"/>
            <dependency name="nodeSizeLocked" value="true"/>
            <visualProperty name="NODE_NESTED_NETWORK_IMAGE_VISIBLE" default="true"/>
            <visualProperty name="NODE_CUSTOMPAINT_8" default="DefaultVisualizableVisualProperty(id=NODE_CUSTOMPAINT_8, name=Node Custom Paint 8)"/>
            <visualProperty name="NODE_CUSTOMPAINT_7" default="DefaultVisualizableVisualProperty(id=NODE_CUSTOMPAINT_7, name=Node Custom Paint 7)"/>
            <visualProperty name="NODE_CUSTOMGRAPHICS_SIZE_2" default="50.0"/>
            <visualProperty name="NODE_CUSTOMGRAPHICS_SIZE_6" default="50.0"/>
            <visualProperty name="NODE_BORDER_STROKE" default="SOLID"/>
            <visualProperty name="NODE_CUSTOMGRAPHICS_POSITION_7" default="C,C,c,0.00,0.00"/>
            <visualProperty name="NODE_CUSTOMGRAPHICS_8" default="org.cytoscape.ding.customgraphics.NullCustomGraphics,0,[ Remove Graphics ],"/>
            <visualProperty name="NODE_TRANSPARENCY" default="255"/>
            <visualProperty name="NODE_LABEL_WIDTH" default="200.0"/>
            <visualProperty name="NODE_CUSTOMGRAPHICS_SIZE_1" default="50.0"/>
            <visualProperty name="NODE_CUSTOMGRAPHICS_5" default="org.cytoscape.ding.customgraphics.NullCustomGraphics,0,[ Remove Graphics ],"/>
            <visualProperty name="NODE_PAINT" default="#787878"/>
            <visualProperty name="NODE_CUSTOMGRAPHICS_9" default="org.cytoscape.ding.customgraphics.NullCustomGraphics,0,[ Remove Graphics ],"/>
            <visualProperty name="NODE_CUSTOMGRAPHICS_1" default="org.cytoscape.ding.customgraphics.NullCustomGraphics,0,[ Remove Graphics ],"/>
            <visualProperty name="NODE_CUSTOMPAINT_3" default="DefaultVisualizableVisualProperty(id=NODE_CUSTOMPAINT_3, name=Node Custom Paint 3)"/>
            <visualProperty name="NODE_CUSTOMGRAPHICS_POSITION_6" default="C,C,c,0.00,0.00"/>
            <visualProperty name="NODE_CUSTOMGRAPHICS_POSITION_2" default="C,C,c,0.00,0.00"/>
            <visualProperty name="NODE_CUSTOMPAINT_2" default="DefaultVisualizableVisualProperty(id=NODE_CUSTOMPAINT_2, name=Node Custom Paint 2)"/>
            <visualProperty name="NODE_SELECTED_PAINT" default="#FFFF00"/>
            <visualProperty name="NODE_CUSTOMPAINT_9" default="DefaultVisualizableVisualProperty(id=NODE_CUSTOMPAINT_9, name=Node Custom Paint 9)"/>
            <visualProperty name="NODE_HEIGHT" default="20.0"/>
            <visualProperty name="NODE_CUSTOMGRAPHICS_POSITION_8" default="C,C,c,0.00,0.00"/>
            <visualProperty name="NODE_CUSTOMGRAPHICS_POSITION_9" default="C,C,c,0.00,0.00"/>
            <visualProperty name="NODE_CUSTOMGRAPHICS_POSITION_1" default="C,C,c,0.00,0.00"/>
            <visualProperty name="NODE_BORDER_TRANSPARENCY" default="255"/>
            <visualProperty name="NODE_CUSTOMGRAPHICS_SIZE_3" default="50.0"/>
            <visualProperty name="NODE_Y_LOCATION" default="0.0"/>
            <visualProperty name="NODE_CUSTOMGRAPHICS_3" default="org.cytoscape.ding.customgraphics.NullCustomGraphics,0,[ Remove Graphics ],"/>
            <visualProperty name="NODE_CUSTOMGRAPHICS_7" default="org.cytoscape.ding.customgraphics.NullCustomGraphics,0,[ Remove Graphics ],"/>
            <visualProperty name="NODE_CUSTOMGRAPHICS_SIZE_7" default="50.0"/>
            <visualProperty name="NODE_CUSTOMGRAPHICS_SIZE_8" default="50.0"/>
            <visualProperty name="NODE_CUSTOMGRAPHICS_POSITION_5" default="C,C,c,0.00,0.00"/>
            <visualProperty name="NODE_SHAPE" default="ELLIPSE"/>
            <visualProperty name="NODE_SELECTED" default="false"/>
            <visualProperty name="NODE_DEPTH" default="0.0"/>
            <visualProperty name="NODE_CUSTOMGRAPHICS_SIZE_5" default="50.0"/>
            <visualProperty name="NODE_FILL_COLOR" default="#000000"/>
            <visualProperty name="NODE_VISIBLE" default="true"/>
            <visualProperty name="NODE_BORDER_WIDTH" default="0.0"/>
            <visualProperty name="NODE_CUSTOMPAINT_4" default="DefaultVisualizableVisualProperty(id=NODE_CUSTOMPAINT_4, name=Node Custom Paint 4)"/>
            <visualProperty name="NODE_Z_LOCATION" default="0.0"/>
            <visualProperty name="NODE_TOOLTIP" default=""/>
            <visualProperty name="NODE_CUSTOMPAINT_5" default="DefaultVisualizableVisualProperty(id=NODE_CUSTOMPAINT_5, name=Node Custom Paint 5)"/>
            <visualProperty name="NODE_BORDER_PAINT" default="#000000"/>
            <visualProperty name="NODE_CUSTOMPAINT_6" default="DefaultVisualizableVisualProperty(id=NODE_CUSTOMPAINT_6, name=Node Custom Paint 6)"/>
            <visualProperty name="NODE_X_LOCATION" default="0.0"/>
            <visualProperty name="NODE_CUSTOMGRAPHICS_6" default="org.cytoscape.ding.customgraphics.NullCustomGraphics,0,[ Remove Graphics ],"/>
            <visualProperty name="NODE_WIDTH" default="20.0"/>
            <visualProperty name="NODE_CUSTOMGRAPHICS_POSITION_3" default="C,C,c,0.00,0.00"/>
            <visualProperty name="NODE_CUSTOMPAINT_1" default="DefaultVisualizableVisualProperty(id=NODE_CUSTOMPAINT_1, name=Node Custom Paint 1)"/>
            <visualProperty name="NODE_CUSTOMGRAPHICS_4" default="org.cytoscape.ding.customgraphics.NullCustomGraphics,0,[ Remove Graphics ],"/>
            <visualProperty name="NODE_LABEL_POSITION" default="C,C,c,0.00,0.00"/>
            <visualProperty name="NODE_LABEL_TRANSPARENCY" default="255"/>
            <visualProperty name="NODE_CUSTOMGRAPHICS_SIZE_4" default="50.0"/>
            <visualProperty name="NODE_CUSTOMGRAPHICS_2" default="org.cytoscape.ding.customgraphics.NullCustomGraphics,0,[ Remove Graphics ],"/>
            <visualProperty name="NODE_CUSTOMGRAPHICS_POSITION_4" default="C,C,c,0.00,0.00"/>
            <visualProperty name="NODE_SIZE" default="40.0"/>
            <visualProperty name="NODE_LABEL_FONT_FACE" default="Monospaced.plain,plain,12"/>
            <visualProperty name="NODE_CUSTOMGRAPHICS_SIZE_9" default="50.0"/>
            <visualProperty name="NODE_LABEL_COLOR" default="#FFFFCC"/>
            <visualProperty name="NODE_LABEL_FONT_SIZE" default="24"/>
            <visualProperty name="NODE_LABEL" default="">
                <passthroughMapping attributeType="string" attributeName="name"/>
            </visualProperty>
        </node>
        <edge>
            <dependency name="arrowColorMatchesEdge" value="false"/>
            <visualProperty name="EDGE_TOOLTIP" default=""/>
            <visualProperty name="EDGE_PAINT" default="#323232"/>
            <visualProperty name="EDGE_LABEL" default=""/>
            <visualProperty name="EDGE_SOURCE_ARROW_UNSELECTED_PAINT" default="#000000"/>
            <visualProperty name="EDGE_STROKE_SELECTED_PAINT" default="#FF0000"/>
            <visualProperty name="EDGE_TRANSPARENCY" default="255"/>
            <visualProperty name="EDGE_SOURCE_ARROW_SELECTED_PAINT" default="#FFFF00"/>
            <visualProperty name="EDGE_WIDTH" default="2.0"/>
            <visualProperty name="EDGE_STROKE_UNSELECTED_PAINT" default="#FFFFFF"/>
            <visualProperty name="EDGE_BEND" default=""/>
            <visualProperty name="EDGE_LABEL_FONT_SIZE" default="10"/>
            <visualProperty name="EDGE_TARGET_ARROW_SHAPE" default="NONE"/>
            <visualProperty name="EDGE_LABEL_TRANSPARENCY" default="255"/>
            <visualProperty name="EDGE_LINE_TYPE" default="LONG_DASH"/>
            <visualProperty name="EDGE_LABEL_FONT_FACE" default="Dialog.plain,plain,10"/>
            <visualProperty name="EDGE_SELECTED" default="false"/>
            <visualProperty name="EDGE_VISIBLE" default="true"/>
            <visualProperty name="EDGE_SOURCE_ARROW_SHAPE" default="NONE"/>
            <visualProperty name="EDGE_CURVED" default="true"/>
            <visualProperty name="EDGE_LABEL_COLOR" default="#000000"/>
            <visualProperty name="EDGE_UNSELECTED_PAINT" default="#404040"/>
            <visualProperty name="EDGE_SELECTED_PAINT" default="#FF0000"/>
            <visualProperty name="EDGE_TARGET_ARROW_UNSELECTED_PAINT" default="#000000"/>
            <visualProperty name="EDGE_TARGET_ARROW_SELECTED_PAINT" default="#FFFF00"/>
        </edge>
    </visualStyle>
    <visualStyle name="Directed">
        <network>
            <visualProperty name="NETWORK_WIDTH" default="550.0"/>
            <visualProperty name="NETWORK_CENTER_Z_LOCATION" default="0.0"/>
            <visualProperty name="NETWORK_SCALE_FACTOR" default="1.0"/>
            <visualProperty name="NETWORK_SIZE" default="550.0"/>
            <visualProperty name="NETWORK_BACKGROUND_PAINT" default="#FFFFFF"/>
            <visualProperty name="NETWORK_DEPTH" default="0.0"/>
            <visualProperty name="NETWORK_NODE_SELECTION" default="true"/>
            <visualProperty name="NETWORK_CENTER_X_LOCATION" default="0.0"/>
            <visualProperty name="NETWORK_TITLE" default=""/>
            <visualProperty name="NETWORK_EDGE_SELECTION" default="true"/>
            <visualProperty name="NETWORK_CENTER_Y_LOCATION" default="0.0"/>
            <visualProperty name="NETWORK_HEIGHT" default="400.0"/>
        </network>
        <node>
            <dependency name="nodeCustomGraphicsSizeSync" value="true"/>
            <dependency name="nodeSizeLocked" value="true"/>
            <visualProperty name="NODE_NESTED_NETWORK_IMAGE_VISIBLE" default="true"/>
            <visualProperty name="NODE_CUSTOMPAINT_8" default="DefaultVisualizableVisualProperty(id=NODE_CUSTOMPAINT_8, name=Node Custom Paint 8)"/>
            <visualProperty name="NODE_CUSTOMPAINT_7" default="DefaultVisualizableVisualProperty(id=NODE_CUSTOMPAINT_7, name=Node Custom Paint 7)"/>
            <visualProperty name="NODE_CUSTOMGRAPHICS_SIZE_2" default="50.0"/>
            <visualProperty name="NODE_CUSTOMGRAPHICS_SIZE_6" default="50.0"/>
            <visualProperty name="NODE_BORDER_STROKE" default="SOLID"/>
            <visualProperty name="NODE_CUSTOMGRAPHICS_POSITION_7" default="C,C,c,0.00,0.00"/>
            <visualProperty name="NODE_CUSTOMGRAPHICS_8" default="org.cytoscape.ding.customgraphics.NullCustomGraphics,0,[ Remove Graphics ],"/>
            <visualProperty name="NODE_TRANSPARENCY" default="255"/>
            <visualProperty name="NODE_LABEL_WIDTH" default="200.0"/>
            <visualProperty name="NODE_CUSTOMGRAPHICS_SIZE_1" default="50.0"/>
            <visualProperty name="NODE_CUSTOMGRAPHICS_5" default="org.cytoscape.ding.customgraphics.NullCustomGraphics,0,[ Remove Graphics ],"/>
            <visualProperty name="NODE_PAINT" default="#787878"/>
            <visualProperty name="NODE_CUSTOMGRAPHICS_9" default="org.cytoscape.ding.customgraphics.NullCustomGraphics,0,[ Remove Graphics ],"/>
            <visualProperty name="NODE_CUSTOMGRAPHICS_1" default="org.cytoscape.ding.customgraphics.NullCustomGraphics,0,[ Remove Graphics ],"/>
            <visualProperty name="NODE_CUSTOMPAINT_3" default="DefaultVisualizableVisualProperty(id=NODE_CUSTOMPAINT_3, name=Node Custom Paint 3)"/>
            <visualProperty name="NODE_CUSTOMGRAPHICS_POSITION_6" default="C,C,c,0.00,0.00"/>
            <visualProperty name="NODE_CUSTOMGRAPHICS_POSITION_2" default="C,C,c,0.00,0.00"/>
            <visualProperty name="NODE_CUSTOMPAINT_2" default="DefaultVisualizableVisualProperty(id=NODE_CUSTOMPAINT_2, name=Node Custom Paint 2)"/>
            <visualProperty name="NODE_SELECTED_PAINT" default="#FF0066"/>
            <visualProperty name="NODE_CUSTOMPAINT_9" default="DefaultVisualizableVisualProperty(id=NODE_CUSTOMPAINT_9, name=Node Custom Paint 9)"/>
            <visualProperty name="NODE_HEIGHT" default="50.0"/>
            <visualProperty name="NODE_CUSTOMGRAPHICS_POSITION_8" default="C,C,c,0.00,0.00"/>
            <visualProperty name="NODE_CUSTOMGRAPHICS_POSITION_9" default="C,C,c,0.00,0.00"/>
            <visualProperty name="NODE_CUSTOMGRAPHICS_POSITION_1" default="C,C,c,0.00,0.00"/>
            <visualProperty name="NODE_BORDER_TRANSPARENCY" default="255"/>
            <visualProperty name="NODE_CUSTOMGRAPHICS_SIZE_3" default="50.0"/>
            <visualProperty name="NODE_Y_LOCATION" default="0.0"/>
            <visualProperty name="NODE_CUSTOMGRAPHICS_3" default="org.cytoscape.ding.customgraphics.NullCustomGraphics,0,[ Remove Graphics ],"/>
            <visualProperty name="NODE_CUSTOMGRAPHICS_7" default="org.cytoscape.ding.customgraphics.NullCustomGraphics,0,[ Remove Graphics ],"/>
            <visualProperty name="NODE_CUSTOMGRAPHICS_SIZE_7" default="50.0"/>
            <visualProperty name="NODE_CUSTOMGRAPHICS_SIZE_8" default="50.0"/>
            <visualProperty name="NODE_CUSTOMGRAPHICS_POSITION_5" default="C,C,c,0.00,0.00"/>
            <visualProperty name="NODE_SHAPE" default="ELLIPSE"/>
            <visualProperty name="NODE_SELECTED" default="false"/>
            <visualProperty name="NODE_DEPTH" default="0.0"/>
            <visualProperty name="NODE_CUSTOMGRAPHICS_SIZE_5" default="50.0"/>
            <visualProperty name="NODE_FILL_COLOR" default="#FFFFFF"/>
            <visualProperty name="NODE_VISIBLE" default="true"/>
            <visualProperty name="NODE_BORDER_WIDTH" default="5.0"/>
            <visualProperty name="NODE_CUSTOMPAINT_4" default="DefaultVisualizableVisualProperty(id=NODE_CUSTOMPAINT_4, name=Node Custom Paint 4)"/>
            <visualProperty name="NODE_Z_LOCATION" default="0.0"/>
            <visualProperty name="NODE_TOOLTIP" default=""/>
            <visualProperty name="NODE_CUSTOMPAINT_5" default="DefaultVisualizableVisualProperty(id=NODE_CUSTOMPAINT_5, name=Node Custom Paint 5)"/>
            <visualProperty name="NODE_BORDER_PAINT" default="#333333"/>
            <visualProperty name="NODE_CUSTOMPAINT_6" default="DefaultVisualizableVisualProperty(id=NODE_CUSTOMPAINT_6, name=Node Custom Paint 6)"/>
            <visualProperty name="NODE_X_LOCATION" default="0.0"/>
            <visualProperty name="NODE_CUSTOMGRAPHICS_6" default="org.cytoscape.ding.customgraphics.NullCustomGraphics,0,[ Remove Graphics ],"/>
            <visualProperty name="NODE_WIDTH" default="50.0"/>
            <visualProperty name="NODE_CUSTOMGRAPHICS_POSITION_3" default="C,C,c,0.00,0.00"/>
            <visualProperty name="NODE_CUSTOMPAINT_1" default="DefaultVisualizableVisualProperty(id=NODE_CUSTOMPAINT_1, name=Node Custom Paint 1)"/>
            <visualProperty name="NODE_CUSTOMGRAPHICS_4" default="org.cytoscape.ding.customgraphics.NullCustomGraphics,0,[ Remove Graphics ],"/>
            <visualProperty name="NODE_LABEL_POSITION" default="C,C,c,0.00,0.00"/>
            <visualProperty name="NODE_LABEL_TRANSPARENCY" default="255"/>
            <visualProperty name="NODE_CUSTOMGRAPHICS_SIZE_4" default="50.0"/>
            <visualProperty name="NODE_CUSTOMGRAPHICS_2" default="org.cytoscape.ding.customgraphics.NullCustomGraphics,0,[ Remove Graphics ],"/>
            <visualProperty name="NODE_CUSTOMGRAPHICS_POSITION_4" default="C,C,c,0.00,0.00"/>
            <visualProperty name="NODE_SIZE" default="50.0"/>
            <visualProperty name="NODE_LABEL_FONT_FACE" default="SansSerif.plain,plain,12"/>
            <visualProperty name="NODE_CUSTOMGRAPHICS_SIZE_9" default="50.0"/>
            <visualProperty name="NODE_LABEL_COLOR" default="#0099CC"/>
            <visualProperty name="NODE_LABEL_FONT_SIZE" default="8"/>
            <visualProperty name="NODE_LABEL" default="">
                <passthroughMapping attributeType="string" attributeName="name"/>
            </visualProperty>
        </node>
        <edge>
            <dependency name="arrowColorMatchesEdge" value="false"/>
            <visualProperty name="EDGE_TOOLTIP" default=""/>
            <visualProperty name="EDGE_PAINT" default="#808080"/>
            <visualProperty name="EDGE_LABEL" default="">
                <passthroughMapping attributeType="string" attributeName="interaction"/>
            </visualProperty>
            <visualProperty name="EDGE_SOURCE_ARROW_UNSELECTED_PAINT" default="#000000"/>
            <visualProperty name="EDGE_STROKE_SELECTED_PAINT" default="#FF0000"/>
            <visualProperty name="EDGE_TRANSPARENCY" default="255"/>
            <visualProperty name="EDGE_SOURCE_ARROW_SELECTED_PAINT" default="#FFFF00"/>
            <visualProperty name="EDGE_WIDTH" default="2.0"/>
            <visualProperty name="EDGE_STROKE_UNSELECTED_PAINT" default="#333333"/>
            <visualProperty name="EDGE_BEND" default=""/>
            <visualProperty name="EDGE_LABEL_FONT_SIZE" default="12"/>
            <visualProperty name="EDGE_TARGET_ARROW_SHAPE" default="ARROW"/>
            <visualProperty name="EDGE_LABEL_TRANSPARENCY" default="255"/>
            <visualProperty name="EDGE_LINE_TYPE" default="SOLID"/>
            <visualProperty name="EDGE_LABEL_FONT_FACE" default="SansSerif.plain,plain,10"/>
            <visualProperty name="EDGE_SELECTED" default="false"/>
            <visualProperty name="EDGE_VISIBLE" default="true"/>
            <visualProperty name="EDGE_SOURCE_ARROW_SHAPE" default="NONE"/>
            <visualProperty name="EDGE_CURVED" default="true"/>
            <visualProperty name="EDGE_LABEL_COLOR" default="#000000"/>
            <visualProperty name="EDGE_UNSELECTED_PAINT" default="#404040"/>
            <visualProperty name="EDGE_SELECTED_PAINT" default="#FF0000"/>
            <visualProperty name="EDGE_TARGET_ARROW_UNSELECTED_PAINT" default="#333333"/>
            <visualProperty name="EDGE_TARGET_ARROW_SELECTED_PAINT" default="#FFFF00"/>
        </edge>
    </visualStyle>
    <visualStyle name="Sample1">
        <network>
            <visualProperty name="NETWORK_WIDTH" default="550.0"/>
            <visualProperty name="NETWORK_CENTER_Z_LOCATION" default="0.0"/>
            <visualProperty name="NETWORK_SCALE_FACTOR" default="1.0"/>
            <visualProperty name="NETWORK_SIZE" default="550.0"/>
            <visualProperty name="NETWORK_BACKGROUND_PAINT" default="#FFFFFF"/>
            <visualProperty name="NETWORK_DEPTH" default="0.0"/>
            <visualProperty name="NETWORK_NODE_SELECTION" default="true"/>
            <visualProperty name="NETWORK_CENTER_X_LOCATION" default="0.0"/>
            <visualProperty name="NETWORK_TITLE" default=""/>
            <visualProperty name="NETWORK_EDGE_SELECTION" default="true"/>
            <visualProperty name="NETWORK_CENTER_Y_LOCATION" default="0.0"/>
            <visualProperty name="NETWORK_HEIGHT" default="400.0"/>
        </network>
        <node>
            <dependency name="nodeCustomGraphicsSizeSync" value="true"/>
            <dependency name="nodeSizeLocked" value="true"/>
            <visualProperty name="NODE_NESTED_NETWORK_IMAGE_VISIBLE" default="true"/>
            <visualProperty name="NODE_CUSTOMPAINT_8" default="DefaultVisualizableVisualProperty(id=NODE_CUSTOMPAINT_8, name=Node Custom Paint 8)"/>
            <visualProperty name="NODE_CUSTOMPAINT_7" default="DefaultVisualizableVisualProperty(id=NODE_CUSTOMPAINT_7, name=Node Custom Paint 7)"/>
            <visualProperty name="NODE_CUSTOMGRAPHICS_SIZE_2" default="50.0"/>
            <visualProperty name="NODE_CUSTOMGRAPHICS_SIZE_6" default="50.0"/>
            <visualProperty name="NODE_BORDER_STROKE" default="SOLID"/>
            <visualProperty name="NODE_CUSTOMGRAPHICS_POSITION_7" default="C,C,c,0.00,0.00"/>
            <visualProperty name="NODE_CUSTOMGRAPHICS_8" default="org.cytoscape.ding.customgraphics.NullCustomGraphics,0,[ Remove Graphics ],"/>
            <visualProperty name="NODE_TRANSPARENCY" default="255"/>
            <visualProperty name="NODE_LABEL_WIDTH" default="200.0"/>
            <visualProperty name="NODE_CUSTOMGRAPHICS_SIZE_1" default="50.0"/>
            <visualProperty name="NODE_CUSTOMGRAPHICS_5" default="org.cytoscape.ding.customgraphics.NullCustomGraphics,0,[ Remove Graphics ],"/>
            <visualProperty name="NODE_PAINT" default="#787878"/>
            <visualProperty name="NODE_CUSTOMGRAPHICS_9" default="org.cytoscape.ding.customgraphics.NullCustomGraphics,0,[ Remove Graphics ],"/>
            <visualProperty name="NODE_CUSTOMGRAPHICS_1" default="org.cytoscape.ding.customgraphics.NullCustomGraphics,0,[ Remove Graphics ],"/>
            <visualProperty name="NODE_CUSTOMPAINT_3" default="DefaultVisualizableVisualProperty(id=NODE_CUSTOMPAINT_3, name=Node Custom Paint 3)"/>
            <visualProperty name="NODE_CUSTOMGRAPHICS_POSITION_6" default="C,C,c,0.00,0.00"/>
            <visualProperty name="NODE_CUSTOMGRAPHICS_POSITION_2" default="C,C,c,0.00,0.00"/>
            <visualProperty name="NODE_CUSTOMPAINT_2" default="DefaultVisualizableVisualProperty(id=NODE_CUSTOMPAINT_2, name=Node Custom Paint 2)"/>
            <visualProperty name="NODE_SELECTED_PAINT" default="#FFFF00"/>
            <visualProperty name="NODE_CUSTOMPAINT_9" default="DefaultVisualizableVisualProperty(id=NODE_CUSTOMPAINT_9, name=Node Custom Paint 9)"/>
            <visualProperty name="NODE_HEIGHT" default="30.0"/>
            <visualProperty name="NODE_CUSTOMGRAPHICS_POSITION_8" default="C,C,c,0.00,0.00"/>
            <visualProperty name="NODE_CUSTOMGRAPHICS_POSITION_9" default="C,C,c,0.00,0.00"/>
            <visualProperty name="NODE_CUSTOMGRAPHICS_POSITION_1" default="C,C,c,0.00,0.00"/>
            <visualProperty name="NODE_BORDER_TRANSPARENCY" default="255"/>
            <visualProperty name="NODE_CUSTOMGRAPHICS_SIZE_3" default="50.0"/>
            <visualProperty name="NODE_Y_LOCATION" default="0.0"/>
            <visualProperty name="NODE_CUSTOMGRAPHICS_3" default="org.cytoscape.ding.customgraphics.NullCustomGraphics,0,[ Remove Graphics ],"/>
            <visualProperty name="NODE_CUSTOMGRAPHICS_7" default="org.cytoscape.ding.customgraphics.NullCustomGraphics,0,[ Remove Graphics ],"/>
            <visualProperty name="NODE_CUSTOMGRAPHICS_SIZE_7" default="50.0"/>
            <visualProperty name="NODE_CUSTOMGRAPHICS_SIZE_8" default="50.0"/>
            <visualProperty name="NODE_CUSTOMGRAPHICS_POSITION_5" default="C,C,c,0.00,0.00"/>
            <visualProperty name="NODE_SHAPE" default="ELLIPSE"/>
            <visualProperty name="NODE_SELECTED" default="false"/>
            <visualProperty name="NODE_DEPTH" default="0.0"/>
            <visualProperty name="NODE_CUSTOMGRAPHICS_SIZE_5" default="50.0"/>
            <visualProperty name="NODE_FILL_COLOR" default="#CCCCFF"/>
            <visualProperty name="NODE_VISIBLE" default="true"/>
            <visualProperty name="NODE_BORDER_WIDTH" default="0.0"/>
            <visualProperty name="NODE_CUSTOMPAINT_4" default="DefaultVisualizableVisualProperty(id=NODE_CUSTOMPAINT_4, name=Node Custom Paint 4)"/>
            <visualProperty name="NODE_Z_LOCATION" default="0.0"/>
            <visualProperty name="NODE_TOOLTIP" default=""/>
            <visualProperty name="NODE_CUSTOMPAINT_5" default="DefaultVisualizableVisualProperty(id=NODE_CUSTOMPAINT_5, name=Node Custom Paint 5)"/>
            <visualProperty name="NODE_BORDER_PAINT" default="#000000"/>
            <visualProperty name="NODE_CUSTOMPAINT_6" default="DefaultVisualizableVisualProperty(id=NODE_CUSTOMPAINT_6, name=Node Custom Paint 6)"/>
            <visualProperty name="NODE_X_LOCATION" default="0.0"/>
            <visualProperty name="NODE_CUSTOMGRAPHICS_6" default="org.cytoscape.ding.customgraphics.NullCustomGraphics,0,[ Remove Graphics ],"/>
            <visualProperty name="NODE_WIDTH" default="70.0"/>
            <visualProperty name="NODE_CUSTOMGRAPHICS_POSITION_3" default="C,C,c,0.00,0.00"/>
            <visualProperty name="NODE_CUSTOMPAINT_1" default="DefaultVisualizableVisualProperty(id=NODE_CUSTOMPAINT_1, name=Node Custom Paint 1)"/>
            <visualProperty name="NODE_CUSTOMGRAPHICS_4" default="org.cytoscape.ding.customgraphics.NullCustomGraphics,0,[ Remove Graphics ],"/>
            <visualProperty name="NODE_LABEL_POSITION" default="C,C,c,0.00,0.00"/>
            <visualProperty name="NODE_LABEL_TRANSPARENCY" default="255"/>
            <visualProperty name="NODE_CUSTOMGRAPHICS_SIZE_4" default="50.0"/>
            <visualProperty name="NODE_CUSTOMGRAPHICS_2" default="org.cytoscape.ding.customgraphics.NullCustomGraphics,0,[ Remove Graphics ],"/>
            <visualProperty name="NODE_CUSTOMGRAPHICS_POSITION_4" default="C,C,c,0.00,0.00"/>
            <visualProperty name="NODE_SIZE" default="40.0"/>
            <visualProperty name="NODE_LABEL_FONT_FACE" default="Dialog.plain,plain,12"/>
            <visualProperty name="NODE_CUSTOMGRAPHICS_SIZE_9" default="50.0"/>
            <visualProperty name="NODE_LABEL_COLOR" default="#000000"/>
            <visualProperty name="NODE_LABEL_FONT_SIZE" default="12"/>
            <visualProperty name="NODE_LABEL" default="">
                <passthroughMapping attributeType="string" attributeName="name"/>
            </visualProperty>
        </node>
        <edge>
            <dependency name="arrowColorMatchesEdge" value="false"/>
            <visualProperty name="EDGE_TOOLTIP" default=""/>
            <visualProperty name="EDGE_PAINT" default="#323232"/>
            <visualProperty name="EDGE_LABEL" default="">
                <passthroughMapping attributeType="string" attributeName="interaction"/>
            </visualProperty>
            <visualProperty name="EDGE_SOURCE_ARROW_UNSELECTED_PAINT" default="#000000"/>
            <visualProperty name="EDGE_STROKE_SELECTED_PAINT" default="#FF0000"/>
            <visualProperty name="EDGE_TRANSPARENCY" default="255"/>
            <visualProperty name="EDGE_SOURCE_ARROW_SELECTED_PAINT" default="#FFFF00"/>
            <visualProperty name="EDGE_WIDTH" default="1.0"/>
            <visualProperty name="EDGE_STROKE_UNSELECTED_PAINT" default="#333333"/>
            <visualProperty name="EDGE_BEND" default=""/>
            <visualProperty name="EDGE_LABEL_FONT_SIZE" default="10"/>
            <visualProperty name="EDGE_TARGET_ARROW_SHAPE" default="NONE"/>
            <visualProperty name="EDGE_LABEL_TRANSPARENCY" default="255"/>
            <visualProperty name="EDGE_LINE_TYPE" default="SOLID">
                <discreteMapping attributeType="string" attributeName="interaction">
                    <discreteMappingEntry value="SOLID" attributeValue="pp"/>
                    <discreteMappingEntry value="LONG_DASH" attributeValue="pd"/>
                </discreteMapping>
            </visualProperty>
            <visualProperty name="EDGE_LABEL_FONT_FACE" default="Dialog.plain,plain,10"/>
            <visualProperty name="EDGE_SELECTED" default="false"/>
            <visualProperty name="EDGE_VISIBLE" default="true"/>
            <visualProperty name="EDGE_SOURCE_ARROW_SHAPE" default="NONE"/>
            <visualProperty name="EDGE_CURVED" default="true"/>
            <visualProperty name="EDGE_LABEL_COLOR" default="#333333"/>
            <visualProperty name="EDGE_UNSELECTED_PAINT" default="#404040"/>
            <visualProperty name="EDGE_SELECTED_PAINT" default="#FF0000"/>
            <visualProperty name="EDGE_TARGET_ARROW_UNSELECTED_PAINT" default="#000000"/>
            <visualProperty name="EDGE_TARGET_ARROW_SELECTED_PAINT" default="#FFFF00"/>
        </edge>
    </visualStyle>
    <visualStyle name="Big Labels">
        <network>
            <visualProperty name="NETWORK_WIDTH" default="550.0"/>
            <visualProperty name="NETWORK_CENTER_Z_LOCATION" default="0.0"/>
            <visualProperty name="NETWORK_SCALE_FACTOR" default="1.0"/>
            <visualProperty name="NETWORK_SIZE" default="550.0"/>
            <visualProperty name="NETWORK_BACKGROUND_PAINT" default="#FFFFFF"/>
            <visualProperty name="NETWORK_DEPTH" default="0.0"/>
            <visualProperty name="NETWORK_NODE_SELECTION" default="true"/>
            <visualProperty name="NETWORK_CENTER_X_LOCATION" default="0.0"/>
            <visualProperty name="NETWORK_TITLE" default=""/>
            <visualProperty name="NETWORK_EDGE_SELECTION" default="true"/>
            <visualProperty name="NETWORK_CENTER_Y_LOCATION" default="0.0"/>
            <visualProperty name="NETWORK_HEIGHT" default="400.0"/>
        </network>
        <node>
            <dependency name="nodeSizeLocked" value="true"/>
            <dependency name="nodeCustomGraphicsSizeSync" value="true"/>
            <visualProperty name="NODE_NESTED_NETWORK_IMAGE_VISIBLE" default="true"/>
            <visualProperty name="NODE_CUSTOMPAINT_8" default="DefaultVisualizableVisualProperty(id=NODE_CUSTOMPAINT_8, name=Node Custom Paint 8)"/>
            <visualProperty name="NODE_CUSTOMPAINT_7" default="DefaultVisualizableVisualProperty(id=NODE_CUSTOMPAINT_7, name=Node Custom Paint 7)"/>
            <visualProperty name="NODE_CUSTOMGRAPHICS_SIZE_2" default="50.0"/>
            <visualProperty name="NODE_CUSTOMGRAPHICS_SIZE_6" default="50.0"/>
            <visualProperty name="NODE_BORDER_STROKE" default="SOLID"/>
            <visualProperty name="NODE_CUSTOMGRAPHICS_POSITION_7" default="C,C,c,0.00,0.00"/>
            <visualProperty name="NODE_CUSTOMGRAPHICS_8" default="org.cytoscape.ding.customgraphics.NullCustomGraphics,0,[ Remove Graphics ],"/>
            <visualProperty name="NODE_TRANSPARENCY" default="255"/>
            <visualProperty name="NODE_LABEL_WIDTH" default="200.0"/>
            <visualProperty name="NODE_CUSTOMGRAPHICS_SIZE_1" default="50.0"/>
            <visualProperty name="NODE_CUSTOMGRAPHICS_5" default="org.cytoscape.ding.customgraphics.NullCustomGraphics,0,[ Remove Graphics ],"/>
            <visualProperty name="NODE_PAINT" default="#787878"/>
            <visualProperty name="NODE_CUSTOMGRAPHICS_9" default="org.cytoscape.ding.customgraphics.NullCustomGraphics,0,[ Remove Graphics ],"/>
            <visualProperty name="NODE_CUSTOMGRAPHICS_1" default="org.cytoscape.ding.customgraphics.NullCustomGraphics,0,[ Remove Graphics ],"/>
            <visualProperty name="NODE_CUSTOMPAINT_3" default="DefaultVisualizableVisualProperty(id=NODE_CUSTOMPAINT_3, name=Node Custom Paint 3)"/>
            <visualProperty name="NODE_CUSTOMGRAPHICS_POSITION_6" default="C,C,c,0.00,0.00"/>
            <visualProperty name="NODE_CUSTOMGRAPHICS_POSITION_2" default="C,C,c,0.00,0.00"/>
            <visualProperty name="NODE_CUSTOMPAINT_2" default="DefaultVisualizableVisualProperty(id=NODE_CUSTOMPAINT_2, name=Node Custom Paint 2)"/>
            <visualProperty name="NODE_SELECTED_PAINT" default="#FF0066"/>
            <visualProperty name="NODE_CUSTOMPAINT_9" default="DefaultVisualizableVisualProperty(id=NODE_CUSTOMPAINT_9, name=Node Custom Paint 9)"/>
            <visualProperty name="NODE_HEIGHT" default="30.0"/>
            <visualProperty name="NODE_CUSTOMGRAPHICS_POSITION_8" default="C,C,c,0.00,0.00"/>
            <visualProperty name="NODE_CUSTOMGRAPHICS_POSITION_9" default="C,C,c,0.00,0.00"/>
            <visualProperty name="NODE_CUSTOMGRAPHICS_POSITION_1" default="C,C,c,0.00,0.00"/>
            <visualProperty name="NODE_BORDER_TRANSPARENCY" default="255"/>
            <visualProperty name="NODE_CUSTOMGRAPHICS_SIZE_3" default="50.0"/>
            <visualProperty name="NODE_Y_LOCATION" default="0.0"/>
            <visualProperty name="NODE_CUSTOMGRAPHICS_3" default="org.cytoscape.ding.customgraphics.NullCustomGraphics,0,[ Remove Graphics ],"/>
            <visualProperty name="NODE_CUSTOMGRAPHICS_7" default="org.cytoscape.ding.customgraphics.NullCustomGraphics,0,[ Remove Graphics ],"/>
            <visualProperty name="NODE_CUSTOMGRAPHICS_SIZE_7" default="50.0"/>
            <visualProperty name="NODE_CUSTOMGRAPHICS_SIZE_8" default="50.0"/>
            <visualProperty name="NODE_CUSTOMGRAPHICS_POSITION_5" default="C,C,c,0.00,0.00"/>
            <visualProperty name="NODE_SHAPE" default="ELLIPSE"/>
            <visualProperty name="NODE_SELECTED" default="false"/>
            <visualProperty name="NODE_DEPTH" default="0.0"/>
            <visualProperty name="NODE_CUSTOMGRAPHICS_SIZE_5" default="50.0"/>
            <visualProperty name="NODE_FILL_COLOR" default="#FFFFFF"/>
            <visualProperty name="NODE_VISIBLE" default="true"/>
            <visualProperty name="NODE_BORDER_WIDTH" default="0.0"/>
            <visualProperty name="NODE_CUSTOMPAINT_4" default="DefaultVisualizableVisualProperty(id=NODE_CUSTOMPAINT_4, name=Node Custom Paint 4)"/>
            <visualProperty name="NODE_Z_LOCATION" default="0.0"/>
            <visualProperty name="NODE_TOOLTIP" default=""/>
            <visualProperty name="NODE_CUSTOMPAINT_5" default="DefaultVisualizableVisualProperty(id=NODE_CUSTOMPAINT_5, name=Node Custom Paint 5)"/>
            <visualProperty name="NODE_BORDER_PAINT" default="#000000"/>
            <visualProperty name="NODE_CUSTOMPAINT_6" default="DefaultVisualizableVisualProperty(id=NODE_CUSTOMPAINT_6, name=Node Custom Paint 6)"/>
            <visualProperty name="NODE_X_LOCATION" default="0.0"/>
            <visualProperty name="NODE_CUSTOMGRAPHICS_6" default="org.cytoscape.ding.customgraphics.NullCustomGraphics,0,[ Remove Graphics ],"/>
            <visualProperty name="NODE_WIDTH" default="30.0"/>
            <visualProperty name="NODE_CUSTOMGRAPHICS_POSITION_3" default="C,C,c,0.00,0.00"/>
            <visualProperty name="NODE_CUSTOMPAINT_1" default="DefaultVisualizableVisualProperty(id=NODE_CUSTOMPAINT_1, name=Node Custom Paint 1)"/>
            <visualProperty name="NODE_CUSTOMGRAPHICS_4" default="org.cytoscape.ding.customgraphics.NullCustomGraphics,0,[ Remove Graphics ],"/>
            <visualProperty name="NODE_LABEL_POSITION" default="C,C,c,0.00,0.00"/>
            <visualProperty name="NODE_LABEL_TRANSPARENCY" default="255"/>
            <visualProperty name="NODE_CUSTOMGRAPHICS_SIZE_4" default="50.0"/>
            <visualProperty name="NODE_CUSTOMGRAPHICS_2" default="org.cytoscape.ding.customgraphics.NullCustomGraphics,0,[ Remove Graphics ],"/>
            <visualProperty name="NODE_CUSTOMGRAPHICS_POSITION_4" default="C,C,c,0.00,0.00"/>
            <visualProperty name="NODE_SIZE" default="50.0"/>
            <visualProperty name="NODE_LABEL_FONT_FACE" default="Dialog.plain,plain,12"/>
            <visualProperty name="NODE_CUSTOMGRAPHICS_SIZE_9" default="50.0"/>
            <visualProperty name="NODE_LABEL_COLOR" default="#333333"/>
            <visualProperty name="NODE_LABEL_FONT_SIZE" default="24"/>
            <visualProperty name="NODE_LABEL" default="">
                <passthroughMapping attributeType="string" attributeName="name"/>
            </visualProperty>
        </node>
        <edge>
            <dependency name="arrowColorMatchesEdge" value="false"/>
            <visualProperty name="EDGE_TOOLTIP" default=""/>
            <visualProperty name="EDGE_PAINT" default="#808080"/>
            <visualProperty name="EDGE_LABEL" default=""/>
            <visualProperty name="EDGE_SOURCE_ARROW_UNSELECTED_PAINT" default="#000000"/>
            <visualProperty name="EDGE_STROKE_SELECTED_PAINT" default="#FF0000"/>
            <visualProperty name="EDGE_TRANSPARENCY" default="255"/>
            <visualProperty name="EDGE_SOURCE_ARROW_SELECTED_PAINT" default="#FFFF00"/>
            <visualProperty name="EDGE_WIDTH" default="2.0"/>
            <visualProperty name="EDGE_STROKE_UNSELECTED_PAINT" default="#666666"/>
            <visualProperty name="EDGE_BEND" default=""/>
            <visualProperty name="EDGE_LABEL_FONT_SIZE" default="10"/>
            <visualProperty name="EDGE_TARGET_ARROW_SHAPE" default="NONE"/>
            <visualProperty name="EDGE_LABEL_TRANSPARENCY" default="255"/>
            <visualProperty name="EDGE_LINE_TYPE" default="SOLID"/>
            <visualProperty name="EDGE_LABEL_FONT_FACE" default="SansSerif.plain,plain,10"/>
            <visualProperty name="EDGE_SELECTED" default="false"/>
            <visualProperty name="EDGE_VISIBLE" default="true"/>
            <visualProperty name="EDGE_SOURCE_ARROW_SHAPE" default="NONE"/>
            <visualProperty name="EDGE_CURVED" default="true"/>
            <visualProperty name="EDGE_LABEL_COLOR" default="#000000"/>
            <visualProperty name="EDGE_UNSELECTED_PAINT" default="#404040"/>
            <visualProperty name="EDGE_SELECTED_PAINT" default="#FF0000"/>
            <visualProperty name="EDGE_TARGET_ARROW_UNSELECTED_PAINT" default="#000000"/>
            <visualProperty name="EDGE_TARGET_ARROW_SELECTED_PAINT" default="#FFFF00"/>
        </edge>
    </visualStyle>
    <visualStyle name="Minimal">
        <network>
            <visualProperty name="NETWORK_WIDTH" default="550.0"/>
            <visualProperty name="NETWORK_CENTER_Z_LOCATION" default="0.0"/>
            <visualProperty name="NETWORK_SCALE_FACTOR" default="1.0"/>
            <visualProperty name="NETWORK_SIZE" default="550.0"/>
            <visualProperty name="NETWORK_BACKGROUND_PAINT" default="#EBEBEB"/>
            <visualProperty name="NETWORK_DEPTH" default="0.0"/>
            <visualProperty name="NETWORK_NODE_SELECTION" default="true"/>
            <visualProperty name="NETWORK_CENTER_X_LOCATION" default="0.0"/>
            <visualProperty name="NETWORK_TITLE" default=""/>
            <visualProperty name="NETWORK_EDGE_SELECTION" default="true"/>
            <visualProperty name="NETWORK_CENTER_Y_LOCATION" default="0.0"/>
            <visualProperty name="NETWORK_HEIGHT" default="400.0"/>
        </network>
        <node>
            <dependency name="nodeCustomGraphicsSizeSync" value="true"/>
            <dependency name="nodeSizeLocked" value="true"/>
            <visualProperty name="NODE_NESTED_NETWORK_IMAGE_VISIBLE" default="true"/>
            <visualProperty name="NODE_CUSTOMPAINT_8" default="DefaultVisualizableVisualProperty(id=NODE_CUSTOMPAINT_8, name=Node Custom Paint 8)"/>
            <visualProperty name="NODE_CUSTOMPAINT_7" default="DefaultVisualizableVisualProperty(id=NODE_CUSTOMPAINT_7, name=Node Custom Paint 7)"/>
            <visualProperty name="NODE_CUSTOMGRAPHICS_SIZE_2" default="50.0"/>
            <visualProperty name="NODE_CUSTOMGRAPHICS_SIZE_6" default="50.0"/>
            <visualProperty name="NODE_BORDER_STROKE" default="SOLID"/>
            <visualProperty name="NODE_CUSTOMGRAPHICS_POSITION_7" default="C,C,c,0.00,0.00"/>
            <visualProperty name="NODE_CUSTOMGRAPHICS_8" default="org.cytoscape.ding.customgraphics.NullCustomGraphics,0,[ Remove Graphics ],"/>
            <visualProperty name="NODE_TRANSPARENCY" default="255"/>
            <visualProperty name="NODE_LABEL_WIDTH" default="200.0"/>
            <visualProperty name="NODE_CUSTOMGRAPHICS_SIZE_1" default="50.0"/>
            <visualProperty name="NODE_CUSTOMGRAPHICS_5" default="org.cytoscape.ding.customgraphics.NullCustomGraphics,0,[ Remove Graphics ],"/>
            <visualProperty name="NODE_PAINT" default="#787878"/>
            <visualProperty name="NODE_CUSTOMGRAPHICS_9" default="org.cytoscape.ding.customgraphics.NullCustomGraphics,0,[ Remove Graphics ],"/>
            <visualProperty name="NODE_CUSTOMGRAPHICS_1" default="org.cytoscape.ding.customgraphics.NullCustomGraphics,0,[ Remove Graphics ],"/>
            <visualProperty name="NODE_CUSTOMPAINT_3" default="DefaultVisualizableVisualProperty(id=NODE_CUSTOMPAINT_3, name=Node Custom Paint 3)"/>
            <visualProperty name="NODE_CUSTOMGRAPHICS_POSITION_6" default="C,C,c,0.00,0.00"/>
            <visualProperty name="NODE_CUSTOMGRAPHICS_POSITION_2" default="C,C,c,0.00,0.00"/>
            <visualProperty name="NODE_CUSTOMPAINT_2" default="DefaultVisualizableVisualProperty(id=NODE_CUSTOMPAINT_2, name=Node Custom Paint 2)"/>
            <visualProperty name="NODE_SELECTED_PAINT" default="#FFFF00"/>
            <visualProperty name="NODE_CUSTOMPAINT_9" default="DefaultVisualizableVisualProperty(id=NODE_CUSTOMPAINT_9, name=Node Custom Paint 9)"/>
            <visualProperty name="NODE_HEIGHT" default="50.0"/>
            <visualProperty name="NODE_CUSTOMGRAPHICS_POSITION_8" default="C,C,c,0.00,0.00"/>
            <visualProperty name="NODE_CUSTOMGRAPHICS_POSITION_9" default="C,C,c,0.00,0.00"/>
            <visualProperty name="NODE_CUSTOMGRAPHICS_POSITION_1" default="C,C,c,0.00,0.00"/>
            <visualProperty name="NODE_BORDER_TRANSPARENCY" default="255"/>
            <visualProperty name="NODE_CUSTOMGRAPHICS_SIZE_3" default="50.0"/>
            <visualProperty name="NODE_Y_LOCATION" default="0.0"/>
            <visualProperty name="NODE_CUSTOMGRAPHICS_3" default="org.cytoscape.ding.customgraphics.NullCustomGraphics,0,[ Remove Graphics ],"/>
            <visualProperty name="NODE_CUSTOMGRAPHICS_7" default="org.cytoscape.ding.customgraphics.NullCustomGraphics,0,[ Remove Graphics ],"/>
            <visualProperty name="NODE_CUSTOMGRAPHICS_SIZE_7" default="50.0"/>
            <visualProperty name="NODE_CUSTOMGRAPHICS_SIZE_8" default="50.0"/>
            <visualProperty name="NODE_CUSTOMGRAPHICS_POSITION_5" default="C,C,c,0.00,0.00"/>
            <visualProperty name="NODE_SHAPE" default="ROUND_RECTANGLE"/>
            <visualProperty name="NODE_SELECTED" default="false"/>
            <visualProperty name="NODE_DEPTH" default="0.0"/>
            <visualProperty name="NODE_CUSTOMGRAPHICS_SIZE_5" default="50.0"/>
            <visualProperty name="NODE_FILL_COLOR" default="#FFFFFF"/>
            <visualProperty name="NODE_VISIBLE" default="true"/>
            <visualProperty name="NODE_BORDER_WIDTH" default="0.0"/>
            <visualProperty name="NODE_CUSTOMPAINT_4" default="DefaultVisualizableVisualProperty(id=NODE_CUSTOMPAINT_4, name=Node Custom Paint 4)"/>
            <visualProperty name="NODE_Z_LOCATION" default="0.0"/>
            <visualProperty name="NODE_TOOLTIP" default=""/>
            <visualProperty name="NODE_CUSTOMPAINT_5" default="DefaultVisualizableVisualProperty(id=NODE_CUSTOMPAINT_5, name=Node Custom Paint 5)"/>
            <visualProperty name="NODE_BORDER_PAINT" default="#000000"/>
            <visualProperty name="NODE_CUSTOMPAINT_6" default="DefaultVisualizableVisualProperty(id=NODE_CUSTOMPAINT_6, name=Node Custom Paint 6)"/>
            <visualProperty name="NODE_X_LOCATION" default="0.0"/>
            <visualProperty name="NODE_CUSTOMGRAPHICS_6" default="org.cytoscape.ding.customgraphics.NullCustomGraphics,0,[ Remove Graphics ],"/>
            <visualProperty name="NODE_WIDTH" default="50.0"/>
            <visualProperty name="NODE_CUSTOMGRAPHICS_POSITION_3" default="C,C,c,0.00,0.00"/>
            <visualProperty name="NODE_CUSTOMPAINT_1" default="DefaultVisualizableVisualProperty(id=NODE_CUSTOMPAINT_1, name=Node Custom Paint 1)"/>
            <visualProperty name="NODE_CUSTOMGRAPHICS_4" default="org.cytoscape.ding.customgraphics.NullCustomGraphics,0,[ Remove Graphics ],"/>
            <visualProperty name="NODE_LABEL_POSITION" default="C,C,c,0.00,0.00"/>
            <visualProperty name="NODE_LABEL_TRANSPARENCY" default="255"/>
            <visualProperty name="NODE_CUSTOMGRAPHICS_SIZE_4" default="50.0"/>
            <visualProperty name="NODE_CUSTOMGRAPHICS_2" default="org.cytoscape.ding.customgraphics.NullCustomGraphics,0,[ Remove Graphics ],"/>
            <visualProperty name="NODE_CUSTOMGRAPHICS_POSITION_4" default="C,C,c,0.00,0.00"/>
            <visualProperty name="NODE_SIZE" default="50.0"/>
            <visualProperty name="NODE_LABEL_FONT_FACE" default="SansSerif.plain,plain,12"/>
            <visualProperty name="NODE_CUSTOMGRAPHICS_SIZE_9" default="50.0"/>
            <visualProperty name="NODE_LABEL_COLOR" default="#333333"/>
            <visualProperty name="NODE_LABEL_FONT_SIZE" default="8"/>
            <visualProperty name="NODE_LABEL" default="">
                <passthroughMapping attributeType="string" attributeName="name"/>
            </visualProperty>
        </node>
        <edge>
            <dependency name="arrowColorMatchesEdge" value="false"/>
            <visualProperty name="EDGE_TOOLTIP" default=""/>
            <visualProperty name="EDGE_PAINT" default="#808080"/>
            <visualProperty name="EDGE_LABEL" default=""/>
            <visualProperty name="EDGE_SOURCE_ARROW_UNSELECTED_PAINT" default="#000000"/>
            <visualProperty name="EDGE_STROKE_SELECTED_PAINT" default="#FF0000"/>
            <visualProperty name="EDGE_TRANSPARENCY" default="255"/>
            <visualProperty name="EDGE_SOURCE_ARROW_SELECTED_PAINT" default="#FFFF00"/>
            <visualProperty name="EDGE_WIDTH" default="2.0"/>
            <visualProperty name="EDGE_STROKE_UNSELECTED_PAINT" default="#999999"/>
            <visualProperty name="EDGE_BEND" default=""/>
            <visualProperty name="EDGE_LABEL_FONT_SIZE" default="10"/>
            <visualProperty name="EDGE_TARGET_ARROW_SHAPE" default="NONE"/>
            <visualProperty name="EDGE_LABEL_TRANSPARENCY" default="255"/>
            <visualProperty name="EDGE_LINE_TYPE" default="SOLID"/>
            <visualProperty name="EDGE_LABEL_FONT_FACE" default="SansSerif.plain,plain,10"/>
            <visualProperty name="EDGE_SELECTED" default="false"/>
            <visualProperty name="EDGE_VISIBLE" default="true"/>
            <visualProperty name="EDGE_SOURCE_ARROW_SHAPE" default="NONE"/>
            <visualProperty name="EDGE_CURVED" default="true"/>
            <visualProperty name="EDGE_LABEL_COLOR" default="#000000"/>
            <visualProperty name="EDGE_UNSELECTED_PAINT" default="#404040"/>
            <visualProperty name="EDGE_SELECTED_PAINT" default="#FF0000"/>
            <visualProperty name="EDGE_TARGET_ARROW_UNSELECTED_PAINT" default="#000000"/>
            <visualProperty name="EDGE_TARGET_ARROW_SELECTED_PAINT" default="#FFFF00"/>
        </edge>
    </visualStyle>
</vizmap>
