# Supplementary material
Source: publisher figshare collection journal article supplement (https://springernature.figshare.com/ndownloader/files/12998375)
Supplement: Supplementary file 1 [file 12998375 › CytoscapeSession-2018_09_09-12_11/tables/1818-Extensive+network/LOCAL_ATTRS-org.cytoscape.model.CyEdge-1818+default+edge.cytable]

CyCSV-Version	1
SUID	interaction	name	selected
java.lang.Long	java.lang.String	java.lang.String	java.lang.Boolean
1818 default edge
2160	pp	RBCK1 (pp) TENM3	false
2161	pp	RBCK1 (pp) UMAD1	false
2162	pp	RBCK1 (pp) UBE2V2	false
2163	pp	RBCK1 (pp) CAPN15	false
2164	pp	RBCK1 (pp) MSTO1	false
2165	pp	RBCK1 (pp) AP2A2	false
2166	pp	RBCK1 (pp) TNIP2	false
2167	pp	RBCK1 (pp) ULK3	false
2168	pp	RBCK1 (pp) YOD1	false
2169	pp	RBCK1 (pp) MOXD1	false
2170	pp	RBCK1 (pp) RNF115	false
2171	pp	RBCK1 (pp) ULBP3	false
2172	pp	RBCK1 (pp) CD82	false
2173	pp	RBCK1 (pp) KHNYN	false
2174	pp	RBCK1 (pp) SHARPIN	false
2175	pp	RBCK1 (pp) NCS1	false
2176	pp	RBCK1 (pp) RNF31	false
2177	pp	RBCK1 (pp) UEVLD	false
2178	pp	RBCK1 (pp) DHFR	false
2179	pp	RBCK1 (pp) RAB9A	false
2180	pp	RBCK1 (pp) PDPN	false
2181	pp	RBCK1 (pp) MFI2	false
2182	pp	RBCK1 (pp) VPS37D	false
2183	pp	RBCK1 (pp) ZFAND2B	false
2184	pp	RBCK1 (pp) AMOT	false
2185	pp	RBCK1 (pp) FAM188A	false
2186	pp	RBCK1 (pp) TNIP1	false
2187	pp	RBCK1 (pp) ATP6AP2	false
2188	pp	BIRC2 (pp) TRAF3	false
2189	pp	BIRC2 (pp) HBE1	false
2190	pp	BIRC2 (pp) PLEKHB2	false
2191	pp	BIRC2 (pp) TRAF2	false
2192	pp	BIRC2 (pp) TNIP1	false
2193	pp	BIRC2 (pp) RIPK1	false
2194	pp	BIRC2 (pp) ULK3	false
2195	pp	BIRC2 (pp) MYCBPAP	false
2196	pp	BIRC2 (pp) TAX1BP1	false
2197	pp	BIRC2 (pp) TNFRSF1A	false
2198	pp	BIRC2 (pp) TNF	false
2199	pp	BIRC2 (pp) UBE2V2	false
2200	pp	BIRC2 (pp) YOD1	false
2201	pp	BIRC2 (pp) PLOD1	false
2202	pp	BIRC2 (pp) AKR7A2	false
2203	pp	BIRC2 (pp) IKBKG	false
2204	pp	BIRC2 (pp) UEVLD	false
2205	pp	BIRC2 (pp) RNF115	false
2206	pp	BIRC2 (pp) OPTN	false
2207	pp	BIRC2 (pp) TNIP2	false
2208	pp	BIRC2 (pp) HAPLN3	false
2209	pp	BIRC2 (pp) UMAD1	false
2210	pp	BIRC2 (pp) RNF31	false
2211	pp	BIRC2 (pp) TRAF1	false
2212	pp	BIRC2 (pp) LGR4	false
2213	pp	BIRC2 (pp) C3orf58	false
2214	pp	BIRC2 (pp) CD82	false
2215	pp	BIRC2 (pp) EFNA5	false
2216	pp	BIRC2 (pp) TNFAIP3	false
2217	pp	TNIP2 (pp) TRO	false
2218	pp	TNIP2 (pp) KIAA1671	false
2219	pp	TNIP2 (pp) ULK3	false
2220	pp	TNIP2 (pp) AMOT	false
2221	pp	TNIP2 (pp) YLPM1	false
2222	pp	TNIP2 (pp) AMOTL1	false
2223	pp	TNIP2 (pp) NF2	false
2224	pp	TNIP2 (pp) TNRC6B	false
2225	pp	TNIP2 (pp) USP54	false
2226	pp	TNIP2 (pp) TRIM25	false
2227	pp	TNIP2 (pp) PRRC2A	false
2228	pp	TNIP2 (pp) MOXD1	false
2229	pp	TNIP2 (pp) IKBKG	false
2230	pp	TNIP2 (pp) TBK1	false
2231	pp	TNIP2 (pp) UEVLD	false
2232	pp	TNIP2 (pp) NCKAP5L	false
2233	pp	TNIP2 (pp) CEP164	false
2234	pp	TNIP2 (pp) CHUK	false
2235	pp	TNIP2 (pp) BAG4	false
2236	pp	TNIP2 (pp) SDCCAG3	false
2237	pp	TNIP2 (pp) MPP5	false
2238	pp	TNIP2 (pp) NDNF	false
2239	pp	TNIP2 (pp) NID2	false
2240	pp	TNIP2 (pp) TNFRSF1A	false
2241	pp	TNIP2 (pp) SHARPIN	false
2242	pp	TNIP2 (pp) TNIP1	false
2243	pp	TNIP2 (pp) TNF	false
2244	pp	TNIP2 (pp) DHFR	false
2245	pp	TNIP2 (pp) TNRC6A	false
2246	pp	TNIP2 (pp) FUBP3	false
2247	pp	TNIP2 (pp) VPS37A	false
2248	pp	TNIP2 (pp) ZCCHC3	false
2249	pp	TNIP2 (pp) LAMA4	false
2250	pp	TNIP2 (pp) EIF3K	false
2251	pp	TNIP2 (pp) IKBKB	false
2252	pp	TNIP2 (pp) SMOC1	false
2253	pp	TNIP2 (pp) RIPK1	false
2254	pp	TNIP2 (pp) SASS6	false
2255	pp	TNIP2 (pp) YTHDF3	false
2256	pp	TNIP2 (pp) RBM4	false
2257	pp	TNIP2 (pp) ZNF598	false
2258	pp	TNIP2 (pp) GOLPH3	false
2259	pp	TNIP2 (pp) CAPN1	false
2260	pp	TNIP2 (pp) TNFAIP3	false
2261	pp	TNIP2 (pp) DTNA	false
2262	pp	TNIP2 (pp) YTHDF1	false
2263	pp	TNIP2 (pp) CD82	false
2264	pp	TNIP2 (pp) TENM3	false
2265	pp	TNIP2 (pp) MLF1	false
2266	pp	TNIP2 (pp) TLDC1	false
2267	pp	TNIP2 (pp) TELO2	false
2268	pp	TNIP2 (pp) MKRN2	false
2269	pp	TNIP2 (pp) SPATA2L	false
2270	pp	TNIP2 (pp) EMILIN2	false
2271	pp	TNIP2 (pp) CSNK1D	false
2272	pp	TNIP2 (pp) NCS1	false
2273	pp	TNIP2 (pp) OTUD7B	false
2274	pp	TNIP2 (pp) TMEM178B	false
2275	pp	TNIP2 (pp) PTBP2	false
2276	pp	TNIP2 (pp) PTX3	false
2277	pp	TNIP2 (pp) C14orf80	false
2278	pp	TNIP2 (pp) SKA1	false
2279	pp	TANK (pp) TNIP2	false
2280	pp	TANK (pp) GSK3A	false
2281	pp	TANK (pp) IVL	false
2282	pp	TANK (pp) GSK3B	false
2283	pp	TANK (pp) BIRC2	false
2284	pp	TANK (pp) MLF1	false
2285	pp	TANK (pp) CEP95	false
2286	pp	TANK (pp) CNOT10	false
2287	pp	TANK (pp) KRT79	false
2288	pp	TANK (pp) PKN2	false
2289	pp	TANK (pp) ATP5B	false
2290	pp	TANK (pp) EIF4G2	false
2291	pp	TANK (pp) DNAJB4	false
2292	pp	TANK (pp) TELO2	false
2293	pp	TANK (pp) ZNF598	false
2294	pp	TANK (pp) RNF115	false
2295	pp	TANK (pp) UEVLD	false
2296	pp	TANK (pp) SASS6	false
2297	pp	TANK (pp) AHNAK	false
2298	pp	TANK (pp) IGHG1	false
2299	pp	TANK (pp) IGKC	false
2300	pp	TANK (pp) RQCD1	false
2301	pp	TANK (pp) RFC3	false
2302	pp	TANK (pp) NOC4L	false
2303	pp	TANK (pp) PARVA	false
2304	pp	TANK (pp) SDCBP2	false
2305	pp	TANK (pp) NTPCR	false
2306	pp	TANK (pp) CCDC112	false
2307	pp	TANK (pp) CALML3	false
2308	pp	TANK (pp) CCDC77	false
2309	pp	TANK (pp) KRT15	false
2310	pp	TANK (pp) MIB1	false
2311	pp	TANK (pp) PDPK1	false
2312	pp	TANK (pp) PELI1	false
2313	pp	TANK (pp) SERPINB4	false
2314	pp	TANK (pp) SSNA1	false
2315	pp	TANK (pp) STK10	false
2316	pp	TANK (pp) TRAF5	false
2317	pp	TANK (pp) YOD1	false
2318	pp	TANK (pp) AP2A1	false
2319	pp	TANK (pp) PAFAH1B1	false
2320	pp	TANK (pp) CNOT1	false
2321	pp	TANK (pp) CHUK	false
2322	pp	TANK (pp) TRAF2	false
2323	pp	TANK (pp) IKBKG	false
2324	pp	TANK (pp) TXLNA	false
2325	pp	TANK (pp) TXLNG	false
2326	pp	TANK (pp) CEP135	false
2327	pp	TANK (pp) IKBKB	false
2328	pp	TANK (pp) CSNK1A1	false
2329	pp	TANK (pp) PICK1	false
2330	pp	TANK (pp) CSNK1D	false
2331	pp	TANK (pp) KIF7	false
2332	pp	TANK (pp) ULK3	false
2333	pp	TANK (pp) CCDC138	false
2334	pp	TANK (pp) NCAPG2	false
2335	pp	TANK (pp) PFDN5	false
2336	pp	TANK (pp) OBSL1	false
2337	pp	TANK (pp) NF2	false
2338	pp	TANK (pp) KIF2C	false
2339	pp	TANK (pp) GDI1	false
2340	pp	TANK (pp) FHL1	false
2341	pp	TANK (pp) TBK1	false
2342	pp	TANK (pp) AMOT	false
2343	pp	TANK (pp) TNIP1	false
2344	pp	TANK (pp) ACTG1	false
2345	pp	TANK (pp) TRAF3	false
2346	pp	TANK (pp) CEP131	false
2347	pp	TANK (pp) CKAP2	false
2348	pp	TANK (pp) PREP	false
2349	pp	TANK (pp) RNF41	false
2350	pp	TANK (pp) EIF3K	false
2351	pp	TANK (pp) FAM20C	false
2352	pp	TANK (pp) NAA50	false
2353	pp	TANK (pp) TRMT6	false
2354	pp	TANK (pp) IGHA1	false
2355	pp	TANK (pp) TNFAIP3	false
2356	pp	TANK (pp) RAB9A	false
2357	pp	TANK (pp) BAIAP2L1	false
2358	pp	TANK (pp) ULBP3	false
2359	pp	TANK (pp) GPSM1	false
2360	pp	TANK (pp) PFDN4	false
2361	pp	TANK (pp) UTP6	false
2362	pp	TANK (pp) HEATR1	false
2363	pp	TANK (pp) SDK2	false
2364	pp	TANK (pp) CCDC50	false
2365	pp	TANK (pp) TENM3	false
2366	pp	TANK (pp) AMOTL1	false
2367	pp	TANK (pp) TRIP6	false
2368	pp	TANK (pp) PRIM1	false
2369	pp	TANK (pp) TBC1D31	false
2370	pp	TANK (pp) TLDC1	false
2371	pp	TANK (pp) EPHB4	false
2372	pp	TANK (pp) CACNA2D2	false
2373	pp	TANK (pp) ZFAND2B	false
2374	pp	TANK (pp) ANAPC7	false
2375	pp	TANK (pp) ANXA4	false
2376	pp	TANK (pp) ATP5A1	false
2377	pp	TANK (pp) CNOT3	false
2378	pp	TANK (pp) CNTFR	false
2379	pp	TANK (pp) EPS8	false
2380	pp	TANK (pp) ERO1A	false
2381	pp	TANK (pp) FUBP3	false
2382	pp	TANK (pp) HAX1	false
2383	pp	TANK (pp) HIST2H3A	false
2384	pp	TANK (pp) IQCB1	false
2385	pp	TANK (pp) MDH2	false
2386	pp	TANK (pp) NEK2	false
2387	pp	TANK (pp) OFD1	false
2388	pp	TANK (pp) OTUD7B	false
2389	pp	TANK (pp) PLEC	false
2390	pp	TANK (pp) PPP2R5D	false
2391	pp	TANK (pp) SAPCD2	false
2392	pp	TANK (pp) SERPINB5	false
2393	pp	TANK (pp) SH3RF1	false
2394	pp	TANK (pp) SNAP47	false
2395	pp	TANK (pp) SPRR1B	false
2396	pp	TANK (pp) TRAF4	false
2397	pp	TANK (pp) UBASH3B	false
2398	pp	TANK (pp) CETN3	false
2399	pp	TANK (pp) INTS7	false
2400	pp	TANK (pp) KIF14	false
2401	pp	TANK (pp) PCSK5	false
2402	pp	TANK (pp) KIF5C	false
2403	pp	TANK (pp) OXSR1	false
2404	pp	TANK (pp) NOL6	false
2405	pp	TANK (pp) NCS1	false
2406	pp	TANK (pp) GIGYF2	false
2407	pp	TANK (pp) IQGAP3	false
2408	pp	TANK (pp) MOXD1	false
2409	pp	TANK (pp) KRT80	false
2410	pp	TANK (pp) HSPA2	false
2411	pp	TANK (pp) OGN	false
2412	pp	TANK (pp) CDC6	false
2413	pp	TANK (pp) TCEB1	false
2414	pp	TANK (pp) PLEKHB2	false
2415	pp	TANK (pp) DYNC2H1	false
2416	pp	TANK (pp) RAB11B	false
2417	pp	TANK (pp) HABP2	false
2418	pp	TANK (pp) FADD	false
2419	pp	TANK (pp) MBTPS1	false
2420	pp	TANK (pp) OIT3	false
2421	pp	TANK (pp) JCHAIN	false
2422	pp	TANK (pp) NPEPPSL1	false
2423	pp	TANK (pp) PRSS3	false
2424	pp	TANK (pp) RFC4	false
2425	pp	TANK (pp) ADSS	false
2426	pp	TANK (pp) CPS1	false
2427	pp	TANK (pp) CAMK2B	false
2428	pp	TANK (pp) HSPA13	false
2429	pp	TANK (pp) MRC2	false
2430	pp	TANK (pp) PPT1	false
2431	pp	TANK (pp) SCPEP1	false
2432	pp	TNIP1 (pp) TBK1	false
2433	pp	TNIP1 (pp) NBR1	false
2434	pp	TNIP1 (pp) SEMA4G	false
2435	pp	TNIP1 (pp) OPTN	false
2436	pp	TNIP1 (pp) ULK3	false
2437	pp	TNIP1 (pp) UEVLD	false
2438	pp	TNIP1 (pp) MLF1	false
2439	pp	TNIP1 (pp) CD82	false
2440	pp	TNIP1 (pp) TAX1BP1	false
2441	pp	TNIP1 (pp) TNIP2	false
2442	pp	TNIP1 (pp) TNFAIP3	false
2443	pp	TNIP1 (pp) TNF	false
2444	pp	TNIP1 (pp) NDNF	false
2445	pp	TNIP1 (pp) COCH	false
2446	pp	TNIP1 (pp) HIST3H2BB	false
2447	pp	TNIP1 (pp) SET	false
2448	pp	TNIP1 (pp) SMOC1	false
2449	pp	TNIP1 (pp) TNFRSF1A	false
2450	pp	TNIP1 (pp) EIF3C	false
2451	pp	TNIP1 (pp) NID2	false
2452	pp	TNIP1 (pp) MYH11	false
2453	pp	TNIP1 (pp) ROR1	false
2454	pp	TNIP1 (pp) RNF115	false
2455	pp	TNIP1 (pp) UMAD1	false
2456	pp	TNIP1 (pp) CACNA2D2	false
2457	pp	TNIP1 (pp) MOXD1	false
2458	pp	TNIP1 (pp) PLEKHB2	false
2459	pp	TNIP1 (pp) TENM3	false
2460	pp	TNIP1 (pp) PJA2	false
2461	pp	TNIP1 (pp) PODXL2	false
2462	pp	TNIP1 (pp) EMILIN2	false
2463	pp	TNIP1 (pp) TRADD	false
2464	pp	TNIP1 (pp) HAPLN3	false
2465	pp	TNIP1 (pp) LAMA4	false
2466	pp	TNIP1 (pp) SPOCK3	false
2467	pp	TNIP1 (pp) SULF2	false
2468	pp	FADD (pp) CSNK1A1	false
2469	pp	FADD (pp) NDNF	false
2470	pp	FADD (pp) CASP8	false
2471	pp	FADD (pp) ROBO2	false
2472	pp	FADD (pp) CCDC50	false
2473	pp	FADD (pp) RIPK1	false
2474	pp	FADD (pp) CSNK1D	false
2475	pp	FADD (pp) KIF2C	false
2476	pp	FADD (pp) TNIP1	false
2477	pp	FADD (pp) ACTG1	false
2478	pp	FADD (pp) S1PR2	false
2479	pp	FADD (pp) DLD	false
2480	pp	FADD (pp) IGHA1	false
2481	pp	FADD (pp) RNF41	false
2482	pp	FADD (pp) PREP	false
2483	pp	FADD (pp) ULK3	false
2484	pp	FADD (pp) DNAAF1	false
2485	pp	FADD (pp) NUPL2	false
2486	pp	FADD (pp) RHOQ	false
2487	pp	FADD (pp) IKBKG	false
2488	pp	FADD (pp) TNFAIP3	false
2489	pp	FADD (pp) SLC7A11	false
2490	pp	FADD (pp) AKR7A2	false
2491	pp	FADD (pp) ROR1	false
2492	pp	FADD (pp) SDK2	false
2493	pp	FADD (pp) EPB41L4B	false
2494	pp	FADD (pp) GOLGA7B	false
2495	pp	FADD (pp) CHUK	false
2496	pp	FADD (pp) CKMT1A	false
2497	pp	FADD (pp) PRDX4	false
2498	pp	TRADD (pp) FADD	false
2499	pp	TRADD (pp) RIPK1	false
2500	pp	TRADD (pp) TRAF3	false
2501	pp	TRADD (pp) CCAR2	false
2502	pp	TRADD (pp) CASP8	false
2503	pp	TRADD (pp) FAM188A	false
2504	pp	TRADD (pp) TNFAIP3	false
2505	pp	TRADD (pp) TNIP1	false
2506	pp	TRADD (pp) RNF115	false
2507	pp	TRADD (pp) PRPF4	false
2508	pp	TRADD (pp) PCOLCE2	false
2509	pp	TRADD (pp) POLR1A	false
2510	pp	TRADD (pp) RRP9	false
2511	pp	TRADD (pp) DENND5A	false
2512	pp	TRADD (pp) TENM3	false
2513	pp	TRADD (pp) EIF3C	false
2514	pp	TRADD (pp) UBE2V2	false
2515	pp	TRADD (pp) TRAF2	false
2516	pp	TRADD (pp) ULK3	false
2517	pp	TRADD (pp) UEVLD	false
2518	pp	TRADD (pp) PCSK5	false
2519	pp	TRADD (pp) IKBKG	false
2520	pp	TRADD (pp) NOL6	false
2521	pp	TRADD (pp) C1QTNF3	false
2522	pp	TRADD (pp) AFM	false
2523	pp	TRADD (pp) G3BP1	false
2524	pp	TRADD (pp) PLOD1	false
2525	pp	TRADD (pp) THOC2	false
2526	pp	TRADD (pp) AKR7A2	false
2527	pp	TRADD (pp) HNRNPCL2	false
2528	pp	TRADD (pp) RCC2	false
2529	pp	TRADD (pp) S1PR2	false
2530	pp	TRADD (pp) ANTXR1	false
2531	pp	TRADD (pp) CHPF	false
2532	pp	TRADD (pp) COASY	false
2533	pp	TRADD (pp) DUS3L	false
2534	pp	TRADD (pp) KLKB1	false
2535	pp	TRADD (pp) NLGN1	false
2536	pp	TRADD (pp) NUP85	false
2537	pp	TRADD (pp) OGN	false
2538	pp	TRADD (pp) RFC3	false
2539	pp	TRADD (pp) SRP19	false
2540	pp	TRADD (pp) HAPLN3	false
2541	pp	TRADD (pp) HERC4	false
2542	pp	TRADD (pp) PDPN	false
2543	pp	TRADD (pp) RANBP2	false
2544	pp	TRADD (pp) BIRC2	false
2545	pp	TRADD (pp) DRG1	false
2546	pp	TRADD (pp) PKN2	false
2547	pp	TRADD (pp) RBP4	false
2548	pp	TRADD (pp) TNF	false
2549	pp	TRADD (pp) CHST12	false
2550	pp	TRADD (pp) THAP4	false
2551	pp	TRAF2 (pp) PSMB3	false
2552	pp	TRAF2 (pp) TBK1	false
2553	pp	TRAF2 (pp) ULK3	false
2554	pp	TRAF2 (pp) MLF1	false
2555	pp	TRAF2 (pp) MYH11	false
2556	pp	TRAF2 (pp) TRAF3	false
2557	pp	TRAF2 (pp) MOXD1	false
2558	pp	TRAF2 (pp) TROAP	false
2559	pp	TRAF2 (pp) TANK	false
2560	pp	TRAF2 (pp) DYRK1A	false
2561	pp	TRAF2 (pp) STAU2	false
2562	pp	TRAF2 (pp) FREM2	false
2563	pp	TRAF2 (pp) BIRC2	false
2564	pp	TRAF2 (pp) ACTG1	false
2565	pp	TRAF2 (pp) USP54	false
2566	pp	TRAF2 (pp) TRADD	false
2567	pp	TRAF2 (pp) DHFR	false
2568	pp	TRAF2 (pp) CD82	false
2569	pp	TRAF2 (pp) UEVLD	false
2570	pp	TRAF2 (pp) PLEKHB2	false
2571	pp	TRAF2 (pp) FZD7	false
2572	pp	TRAF2 (pp) TMEM178B	false
2573	pp	TRAF2 (pp) RAB9A	false
2574	pp	TRAF2 (pp) TNIP1	false
2575	pp	TRAF2 (pp) TNFRSF1A	false
2576	pp	TRAF2 (pp) RIPK1	false
2577	pp	TRAF2 (pp) PTBP2	false
2578	pp	TRAF2 (pp) TNF	false
2579	pp	TRAF2 (pp) KRT80	false
2580	pp	TRAF2 (pp) EPHA5	false
2581	pp	TRAF2 (pp) CEP85	false
2582	pp	TRAF2 (pp) C1orf122	false
2583	pp	TRAF2 (pp) VPS37D	false
2584	pp	TRAF2 (pp) PLEC	false
2585	pp	TRAF2 (pp) CPVL	false
2586	pp	TRAF2 (pp) IGHG1	false
2587	pp	TRAF2 (pp) EIF4G2	false
2588	pp	TRAF2 (pp) USP25	false
2589	pp	TRAF2 (pp) TNIP2	false
2590	pp	TRAF2 (pp) NCS1	false
2591	pp	TRAF2 (pp) FAM188A	false
2592	pp	TRAF2 (pp) UMAD1	false
2593	pp	TRAF2 (pp) DENND5A	false
2594	pp	TRAF2 (pp) SLC7A11	false
2595	pp	TRAF2 (pp) TENM3	false
2596	pp	TRAF2 (pp) CSNK1A1	false
2597	pp	TRAF2 (pp) ZFAND6	false
2598	pp	TRAF2 (pp) ARG1	false
2599	pp	TRAF2 (pp) MAVS	false
2600	pp	TRAF2 (pp) TNFAIP3	false
2601	pp	TNFAIP3 (pp) TRAF2	false
2602	pp	TNFAIP3 (pp) PLEKHB2	false
2603	pp	TNFAIP3 (pp) C3orf58	false
2604	pp	TNFAIP3 (pp) KIF5C	false
2605	pp	TNFAIP3 (pp) TNIP1	false
2606	pp	TNFAIP3 (pp) TNIP2	false
2607	pp	TNFAIP3 (pp) TAX1BP1	false
2608	pp	TNFAIP3 (pp) TBK1	false
2609	pp	TNFAIP3 (pp) AZI2	false
2610	pp	TNFAIP3 (pp) ART4	false
2611	pp	TNFAIP3 (pp) RIPK1	false
2612	pp	TNFAIP3 (pp) SLC26A2	false
2613	pp	TNFAIP3 (pp) OPTN	false
2614	pp	TNFAIP3 (pp) TNFRSF1A	false
2615	pp	TNFAIP3 (pp) TRADD	false
2616	pp	TNFAIP3 (pp) FZD7	false
2617	pp	TNFAIP3 (pp) G3BP1	false
2618	pp	TNFAIP3 (pp) PCSK5	false
2619	pp	TNFAIP3 (pp) STAT1	false
2620	pp	TNFAIP3 (pp) CALCOCO2	false
2621	pp	TNFAIP3 (pp) HABP2	false
2622	pp	TNFAIP3 (pp) MYH11	false
2623	pp	TNFAIP3 (pp) PREP	false
2624	pp	TNFAIP3 (pp) TTR	false
2625	pp	TNFAIP3 (pp) RCC2	false
2626	pp	TNFAIP3 (pp) TNF	false
2627	pp	TNFAIP3 (pp) S1PR2	false
2628	pp	TNFAIP3 (pp) AFM	false
2629	pp	TNFAIP3 (pp) GALNT1	false
2630	pp	TNFAIP3 (pp) LRRC69	false
2631	pp	TNFAIP3 (pp) SDK2	false
2632	pp	TNFAIP3 (pp) SEPSECS	false
2633	pp	RNF31 (pp) RTN3	false
2634	pp	RNF31 (pp) TNIP1	false
2635	pp	RNF31 (pp) TNF	false
2636	pp	RNF31 (pp) TNFAIP3	false
2637	pp	RNF31 (pp) SPR	false
2638	pp	RNF31 (pp) REEP5	false
2639	pp	RNF31 (pp) GDI1	false
2640	pp	RNF31 (pp) GOLGA3	false
2641	pp	RNF31 (pp) DNAH8	false
2642	pp	RNF31 (pp) HM13	false
2643	pp	RNF31 (pp) CD82	false
2644	pp	RNF31 (pp) HNRNPCL2	false
2645	pp	IKBKG (pp) CHUK	false
2646	pp	IKBKG (pp) NF2	false
2647	pp	IKBKG (pp) TNRC6B	false
2648	pp	IKBKG (pp) ALMS1	false
2649	pp	IKBKG (pp) KIAA1671	false
2650	pp	IKBKG (pp) TNRC6A	false
2651	pp	IKBKG (pp) TBK1	false
2652	pp	IKBKG (pp) USP54	false
2653	pp	IKBKG (pp) MPP5	false
2654	pp	IKBKG (pp) RNF31	false
2655	pp	IKBKG (pp) CCDC14	false
2656	pp	IKBKG (pp) AMOT	false
2657	pp	IKBKG (pp) IKBKB	false
2658	pp	IKBKG (pp) CSNK1A1	false
2659	pp	IKBKG (pp) CSNK1D	false
2660	pp	IKBKG (pp) IDE	false
2661	pp	IKBKG (pp) ACTG1	false
2662	pp	IKBKG (pp) TNFAIP3	false
2663	pp	IKBKG (pp) TNF	false
2664	pp	IKBKG (pp) TNFRSF1A	false
2665	pp	IKBKG (pp) CYLD	false
2666	pp	IKBKG (pp) PLEKHB2	false
2667	pp	IKBKG (pp) FAM83H	false
2668	pp	IKBKG (pp) G3BP1	false
2669	pp	IKBKG (pp) PCSK5	false
2670	pp	IKBKG (pp) AKR7A2	false
2671	pp	IKBKG (pp) NTPCR	false
2672	pp	IKBKG (pp) MPHOSPH9	false
2673	pp	IKBKG (pp) NUP43	false
2674	pp	IKBKG (pp) TRIP6	false
2675	pp	IKBKG (pp) CCDC138	false
2676	pp	IKBKG (pp) TANK	false
2677	pp	IKBKG (pp) CDK4	false
2678	pp	IKBKG (pp) TNIP1	false
2679	pp	IKBKG (pp) AMOTL1	false
2680	pp	IKBKG (pp) RIPK1	false
2681	pp	IKBKG (pp) F10	false
2682	pp	IKBKG (pp) LNX2	false
2683	pp	IKBKG (pp) RADIL	false
2684	pp	IKBKG (pp) TAB1	false
2685	pp	IKBKG (pp) TRADD	false
2686	pp	SHARPIN (pp) GDI1	false
2687	pp	SHARPIN (pp) TNIP2	false
2688	pp	SHARPIN (pp) TNIP1	false
2689	pp	SHARPIN (pp) RNF31	false
2690	pp	SHARPIN (pp) MAP3K7	false
2691	pp	SHARPIN (pp) TAB2	false
2692	pp	SHARPIN (pp) NCS1	false
2693	pp	SHARPIN (pp) TENM3	false
2694	pp	SHARPIN (pp) ULK3	false
2695	pp	SHARPIN (pp) TRAF3	false
2696	pp	SHARPIN (pp) TAB1	false
2697	pp	SHARPIN (pp) RAB9A	false
2698	pp	SHARPIN (pp) FZD7	false
2699	pp	SHARPIN (pp) TNF	false
2700	pp	SHARPIN (pp) ORAI1	false
2701	pp	SHARPIN (pp) TLDC1	false
2702	pp	SHARPIN (pp) VPS37D	false
2703	pp	SHARPIN (pp) LDOC1L	false
2704	pp	SHARPIN (pp) IKBKG	false
2705	pp	SHARPIN (pp) MKRN2	false
2706	pp	SHARPIN (pp) MKRN4P	false
2707	pp	SHARPIN (pp) PHB2	false
2708	pp	SHARPIN (pp) PDPN	false
2709	pp	SHARPIN (pp) RBCK1	false
2710	pp	SHARPIN (pp) ULBP3	false
2711	pp	SHARPIN (pp) DHFR	false
2712	pp	SHARPIN (pp) MOXD1	false
2713	pp	SHARPIN (pp) SEMA4G	false
2714	pp	SHARPIN (pp) HPRT1	false
2715	pp	SHARPIN (pp) UMAD1	false
2716	pp	SHARPIN (pp) TNFAIP3	false
2717	pp	SHARPIN (pp) S1PR2	false
2718	pp	SHARPIN (pp) UEVLD	false
2719	pp	SHARPIN (pp) DNAJB4	false
2720	pp	SHARPIN (pp) ZCCHC3	false
