# Supplementary material
Source: publisher figshare collection journal article supplement (https://springernature.figshare.com/ndownloader/files/12998375)
Supplement: Supplementary file 1 [file 12998375 › CytoscapeSession-2018_09_09-12_11/tables/1818-Extensive+network/LOCAL_ATTRS-org.cytoscape.model.CyNode-1818+default+node.cytable]

CyCSV-Version	1
SUID	name	selected
java.lang.Long	java.lang.String	java.lang.Boolean
1818 default node
1844	REEP5	false
1845	AP2A2	false
1846	MSTO1	false
1847	MFI2	false
1848	CAPN15	false
1849	UMAD1	false
1850	CPVL	false
1851	RBCK1	false
1852	VPS37D	false
1853	PSMB3	false
1854	C1orf122	false
1855	PAFAH1B1	false
1856	AP2A1	false
1857	KIF14	false
1858	YOD1	false
1859	INTS7	false
1860	TRAF5	false
1861	CETN3	false
1862	STK10	false
1863	UBASH3B	false
1864	SSNA1	false
1865	TRAF4	false
1866	SERPINB4	false
1867	SPRR1B	false
1868	PELI1	false
1869	SNAP47	false
1870	PDPK1	false
1871	SH3RF1	false
1872	MIB1	false
1873	SERPINB5	false
1874	KRT15	false
1875	SAPCD2	false
1876	CCDC77	false
1877	PPP2R5D	false
1878	CALML3	false
1879	PLEC	false
1880	CCDC112	false
1881	OTUD7B	false
1882	NTPCR	false
1883	OFD1	false
1884	SDCBP2	false
1885	NEK2	false
1886	PARVA	false
1887	MDH2	false
1888	NOC4L	false
1889	IQCB1	false
1890	RFC3	false
1891	HIST2H3A	false
1892	RQCD1	false
1893	HAX1	false
1894	IGKC	false
1895	ERO1A	false
1896	IGHG1	false
1897	EPS8	false
1898	AHNAK	false
1899	CNTFR	false
1900	SASS6	false
1901	CNOT3	false
1902	UEVLD	false
1903	ATP5A1	false
1904	ZNF598	false
1905	ANXA4	false
1906	TELO2	false
1907	ANAPC7	false
1908	DNAJB4	false
1909	ZFAND2B	false
1910	EIF4G2	false
1911	CACNA2D2	false
1912	ATP5B	false
1913	EPHB4	false
1914	PKN2	false
1915	TLDC1	false
1916	KRT79	false
1917	TBC1D31	false
1918	CNOT10	false
1919	PRIM1	false
1920	CEP95	false
1921	MLF1	false
1922	BIRC2	false
1923	SDK2	false
1924	GSK3B	false
1925	HEATR1	false
1926	IVL	false
1927	UTP6	false
1928	GSK3A	false
1929	PFDN4	false
1930	TNIP2	false
1931	GPSM1	false
1932	TANK	false
1933	ROBO2	false
1934	BAIAP2L1	false
1935	NDNF	false
1936	RHOQ	false
1937	CSNK1A1	false
1938	NUPL2	false
1939	UBE2V2	false
1940	DNAAF1	false
1941	EIF3C	false
1942	TENM3	false
1943	TRIP6	false
1944	DENND5A	false
1945	NUP43	false
1946	RRP9	false
1947	MPHOSPH9	false
1948	POLR1A	false
1949	PCOLCE2	false
1950	PRPF4	false
1951	FAM83H	false
1952	RNF115	false
1953	RBP4	false
1954	TNIP1	false
1955	DRG1	false
1956	FAM188A	false
1957	RANBP2	false
1958	CASP8	false
1959	PDPN	false
1960	CCAR2	false
1961	HERC4	false
1962	TRAF3	false
1963	HAPLN3	false
1964	RIPK1	false
1965	SRP19	false
1966	FADD	false
1967	TRADD	false
1968	OGN	false
1969	C3orf58	false
1970	NUP85	false
1971	PLEKHB2	false
1972	NLGN1	false
1973	TRAF2	false
1974	TNFAIP3	false
1975	KLKB1	false
1976	DUS3L	false
1977	COASY	false
1978	CHPF	false
1979	ANTXR1	false
1980	HNRNPCL2	false
1981	AKR7A2	false
1982	THOC2	false
1983	PLOD1	false
1984	RCC2	false
1985	TTR	false
1986	HABP2	false
1987	CALCOCO2	false
1988	STAT1	false
1989	G3BP1	false
1990	YTHDF3	false
1991	ORAI1	false
1992	SPR	false
1993	CEP85	false
1994	EPHA5	false
1995	KRT80	false
1996	CYLD	false
1997	AFM	false
1998	MYCBPAP	false
1999	LAMA4	false
2000	ZCCHC3	false
2001	VPS37A	false
2002	FUBP3	false
2003	NID2	false
2004	SDCCAG3	false
2005	SMOC1	false
2006	SET	false
2007	HIST3H2BB	false
2008	COCH	false
2009	TNF	false
2010	PTBP2	false
2011	TNFRSF1A	false
2012	RAB9A	false
2013	TMEM178B	false
2014	FZD7	false
2015	TRMT6	false
2016	NAA50	false
2017	FAM20C	false
2018	EIF3K	false
2019	EFNA5	false
2020	PREP	false
2021	RNF41	false
2022	SKA1	false
2023	IGHA1	false
2024	C14orf80	false
2025	DLD	false
2026	PTX3	false
2027	S1PR2	false
2028	C1QTNF3	false
2029	SPATA2L	false
2030	SLC26A2	false
2031	SULF2	false
2032	SPOCK3	false
2033	BAG4	false
2034	EMILIN2	false
2035	TAB1	false
2036	PODXL2	false
2037	RTN3	false
2038	DHFR	false
2039	ATP6AP2	false
2040	MAVS	false
2041	CKAP2	false
2042	ARG1	false
2043	CEP131	false
2044	ZFAND6	false
2045	ACTG1	false
2046	SCPEP1	false
2047	IDE	false
2048	PPT1	false
2049	MRC2	false
2050	HSPA13	false
2051	NOL6	false
2052	CAMK2B	false
2053	CPS1	false
2054	PCSK5	false
2055	ADSS	false
2056	RFC4	false
2057	ART4	false
2058	PRSS3	false
2059	AZI2	false
2060	NPEPPSL1	false
2061	TAX1BP1	false
2062	JCHAIN	false
2063	OIT3	false
2064	MBTPS1	false
2065	HBE1	false
2066	RAB11B	false
2067	CEP164	false
2068	DYNC2H1	false
2069	NCKAP5L	false
2070	PRDX4	false
2071	CKMT1A	false
2072	PRRC2A	false
2073	GOLGA7B	false
2074	TRIM25	false
2075	EPB41L4B	false
2076	AMOTL1	false
2077	YLPM1	false
2078	RADIL	false
2079	AMOT	false
2080	LNX2	false
2081	F10	false
2082	THAP4	false
2083	TAB2	false
2084	CHST12	false
2085	MAP3K7	false
2086	SEPSECS	false
2087	NCS1	false
2088	LRRC69	false
2089	KHNYN	false
2090	GALNT1	false
2091	CD82	false
2092	ULBP3	false
2093	LGR4	false
2094	TRAF1	false
2095	FREM2	false
2096	STAU2	false
2097	DYRK1A	false
2098	PJA2	false
2099	HPRT1	false
2100	TROAP	false
2101	MOXD1	false
2102	TCEB1	false
2103	MYH11	false
2104	CDC6	false
2105	FHL1	false
2106	HSPA2	false
2107	KIF2C	false
2108	SLC7A11	false
2109	OBSL1	false
2110	PFDN5	false
2111	NCAPG2	false
2112	CCDC138	false
2113	IQGAP3	false
2114	KIF7	false
2115	GIGYF2	false
2116	PICK1	false
2117	IKBKB	false
2118	CEP135	false
2119	CDK4	false
2120	TXLNG	false
2121	TXLNA	false
2122	YTHDF1	false
2123	CNOT1	false
2124	DTNA	false
2125	CSNK1D	false
2126	CCDC14	false
2127	RNF31	false
2128	USP25	false
2129	MPP5	false
2130	USP54	false
2131	OXSR1	false
2132	TNRC6A	false
2133	ALMS1	false
2134	TNRC6B	false
2135	CAPN1	false
2136	NF2	false
2137	GOLPH3	false
2138	CHUK	false
2139	IKBKG	false
2140	RBM4	false
2141	KIF5C	false
2142	ROR1	false
2143	CCDC50	false
2144	PHB2	false
2145	ULK3	false
2146	MKRN4P	false
2147	KIAA1671	false
2148	MKRN2	false
2149	TRO	false
2150	OPTN	false
2151	LDOC1L	false
2152	SEMA4G	false
2153	NBR1	false
2154	HM13	false
2155	TBK1	false
2156	DNAH8	false
2157	GOLGA3	false
2158	GDI1	false
2159	SHARPIN	false
