# Supplementary material
Source: publisher figshare collection journal article supplement (https://springernature.figshare.com/ndownloader/files/12998375)
Supplement: Supplementary file 1 [file 12998375 › CytoscapeSession-2018_09_09-12_11/tables/1818-Extensive+network/SHARED_ATTRS-org.cytoscape.model.CyEdge-1818+shared+edge.cytable]

CyCSV-Version	1
SUID	Identifier	shared interaction	shared name
java.lang.Long	java.lang.String	java.lang.String	java.lang.String
	mutable
1818 shared edge
2160	C	pp	RBCK1 (pp) TENM3
2161	C	pp	RBCK1 (pp) UMAD1
2162	C	pp	RBCK1 (pp) UBE2V2
2163	C	pp	RBCK1 (pp) CAPN15
2164	C	pp	RBCK1 (pp) MSTO1
2165	C	pp	RBCK1 (pp) AP2A2
2166	E	pp	RBCK1 (pp) TNIP2
2167	E	pp	RBCK1 (pp) ULK3
2168	E	pp	RBCK1 (pp) YOD1
2169	E	pp	RBCK1 (pp) MOXD1
2170	E	pp	RBCK1 (pp) RNF115
2171	E	pp	RBCK1 (pp) ULBP3
2172	E	pp	RBCK1 (pp) CD82
2173	E	pp	RBCK1 (pp) KHNYN
2174	E	pp	RBCK1 (pp) SHARPIN
2175	E	pp	RBCK1 (pp) NCS1
2176	F	pp	RBCK1 (pp) RNF31
2177	F	pp	RBCK1 (pp) UEVLD
2178	F	pp	RBCK1 (pp) DHFR
2179	G	pp	RBCK1 (pp) RAB9A
2180	I	pp	RBCK1 (pp) PDPN
2181	I	pp	RBCK1 (pp) MFI2
2182	I	pp	RBCK1 (pp) VPS37D
2183	I	pp	RBCK1 (pp) ZFAND2B
2184	M	pp	RBCK1 (pp) AMOT
2185	O	pp	RBCK1 (pp) FAM188A
2186	Q	pp	RBCK1 (pp) TNIP1
2187	Q	pp	RBCK1 (pp) ATP6AP2
2188	E	pp	BIRC2 (pp) TRAF3
2189	E	pp	BIRC2 (pp) HBE1
2190	E	pp	BIRC2 (pp) PLEKHB2
2191	F	pp	BIRC2 (pp) TRAF2
2192	F	pp	BIRC2 (pp) TNIP1
2193	F	pp	BIRC2 (pp) RIPK1
2194	F	pp	BIRC2 (pp) ULK3
2195	G	pp	BIRC2 (pp) MYCBPAP
2196	G	pp	BIRC2 (pp) TAX1BP1
2197	G	pp	BIRC2 (pp) TNFRSF1A
2198	H	pp	BIRC2 (pp) TNF
2199	H	pp	BIRC2 (pp) UBE2V2
2200	H	pp	BIRC2 (pp) YOD1
2201	I	pp	BIRC2 (pp) PLOD1
2202	I	pp	BIRC2 (pp) AKR7A2
2203	K	pp	BIRC2 (pp) IKBKG
2204	K	pp	BIRC2 (pp) UEVLD
2205	K	pp	BIRC2 (pp) RNF115
2206	L	pp	BIRC2 (pp) OPTN
2207	M	pp	BIRC2 (pp) TNIP2
2208	O	pp	BIRC2 (pp) HAPLN3
2209	O	pp	BIRC2 (pp) UMAD1
2210	O	pp	BIRC2 (pp) RNF31
2211	O	pp	BIRC2 (pp) TRAF1
2212	P	pp	BIRC2 (pp) LGR4
2213	P	pp	BIRC2 (pp) C3orf58
2214	Q	pp	BIRC2 (pp) CD82
2215	Q	pp	BIRC2 (pp) EFNA5
2216	Q	pp	BIRC2 (pp) TNFAIP3
2217	C	pp	TNIP2 (pp) TRO
2218	C	pp	TNIP2 (pp) KIAA1671
2219	C	pp	TNIP2 (pp) ULK3
2220	E	pp	TNIP2 (pp) AMOT
2221	E	pp	TNIP2 (pp) YLPM1
2222	E	pp	TNIP2 (pp) AMOTL1
2223	E	pp	TNIP2 (pp) NF2
2224	E	pp	TNIP2 (pp) TNRC6B
2225	E	pp	TNIP2 (pp) USP54
2226	E	pp	TNIP2 (pp) TRIM25
2227	E	pp	TNIP2 (pp) PRRC2A
2228	E	pp	TNIP2 (pp) MOXD1
2229	E	pp	TNIP2 (pp) IKBKG
2230	E	pp	TNIP2 (pp) TBK1
2231	E	pp	TNIP2 (pp) UEVLD
2232	E	pp	TNIP2 (pp) NCKAP5L
2233	E	pp	TNIP2 (pp) CEP164
2234	F	pp	TNIP2 (pp) CHUK
2235	F	pp	TNIP2 (pp) BAG4
2236	G	pp	TNIP2 (pp) SDCCAG3
2237	G	pp	TNIP2 (pp) MPP5
2238	G	pp	TNIP2 (pp) NDNF
2239	G	pp	TNIP2 (pp) NID2
2240	G	pp	TNIP2 (pp) TNFRSF1A
2241	G	pp	TNIP2 (pp) SHARPIN
2242	G	pp	TNIP2 (pp) TNIP1
2243	G	pp	TNIP2 (pp) TNF
2244	G	pp	TNIP2 (pp) DHFR
2245	G	pp	TNIP2 (pp) TNRC6A
2246	G	pp	TNIP2 (pp) FUBP3
2247	G	pp	TNIP2 (pp) VPS37A
2248	G	pp	TNIP2 (pp) ZCCHC3
2249	G	pp	TNIP2 (pp) LAMA4
2250	G	pp	TNIP2 (pp) EIF3K
2251	G	pp	TNIP2 (pp) IKBKB
2252	G	pp	TNIP2 (pp) SMOC1
2253	G	pp	TNIP2 (pp) RIPK1
2254	H	pp	TNIP2 (pp) SASS6
2255	H	pp	TNIP2 (pp) YTHDF3
2256	I	pp	TNIP2 (pp) RBM4
2257	I	pp	TNIP2 (pp) ZNF598
2258	I	pp	TNIP2 (pp) GOLPH3
2259	I	pp	TNIP2 (pp) CAPN1
2260	I	pp	TNIP2 (pp) TNFAIP3
2261	K	pp	TNIP2 (pp) DTNA
2262	K	pp	TNIP2 (pp) YTHDF1
2263	K	pp	TNIP2 (pp) CD82
2264	O	pp	TNIP2 (pp) TENM3
2265	O	pp	TNIP2 (pp) MLF1
2266	Q	pp	TNIP2 (pp) TLDC1
2267	Q	pp	TNIP2 (pp) TELO2
2268	Q	pp	TNIP2 (pp) MKRN2
2269	Q	pp	TNIP2 (pp) SPATA2L
2270	Q	pp	TNIP2 (pp) EMILIN2
2271	Q	pp	TNIP2 (pp) CSNK1D
2272	Q	pp	TNIP2 (pp) NCS1
2273	Q	pp	TNIP2 (pp) OTUD7B
2274	Q	pp	TNIP2 (pp) TMEM178B
2275	Q	pp	TNIP2 (pp) PTBP2
2276	Q	pp	TNIP2 (pp) PTX3
2277	Q	pp	TNIP2 (pp) C14orf80
2278	Q	pp	TNIP2 (pp) SKA1
2279	C	pp	TANK (pp) TNIP2
2280	C	pp	TANK (pp) GSK3A
2281	C	pp	TANK (pp) IVL
2282	C	pp	TANK (pp) GSK3B
2283	C	pp	TANK (pp) BIRC2
2284	C	pp	TANK (pp) MLF1
2285	C	pp	TANK (pp) CEP95
2286	C	pp	TANK (pp) CNOT10
2287	C	pp	TANK (pp) KRT79
2288	C	pp	TANK (pp) PKN2
2289	C	pp	TANK (pp) ATP5B
2290	C	pp	TANK (pp) EIF4G2
2291	C	pp	TANK (pp) DNAJB4
2292	C	pp	TANK (pp) TELO2
2293	C	pp	TANK (pp) ZNF598
2294	C	pp	TANK (pp) RNF115
2295	C	pp	TANK (pp) UEVLD
2296	C	pp	TANK (pp) SASS6
2297	C	pp	TANK (pp) AHNAK
2298	C	pp	TANK (pp) IGHG1
2299	C	pp	TANK (pp) IGKC
2300	C	pp	TANK (pp) RQCD1
2301	C	pp	TANK (pp) RFC3
2302	C	pp	TANK (pp) NOC4L
2303	C	pp	TANK (pp) PARVA
2304	C	pp	TANK (pp) SDCBP2
2305	C	pp	TANK (pp) NTPCR
2306	C	pp	TANK (pp) CCDC112
2307	C	pp	TANK (pp) CALML3
2308	C	pp	TANK (pp) CCDC77
2309	C	pp	TANK (pp) KRT15
2310	C	pp	TANK (pp) MIB1
2311	C	pp	TANK (pp) PDPK1
2312	C	pp	TANK (pp) PELI1
2313	C	pp	TANK (pp) SERPINB4
2314	C	pp	TANK (pp) SSNA1
2315	C	pp	TANK (pp) STK10
2316	C	pp	TANK (pp) TRAF5
2317	C	pp	TANK (pp) YOD1
2318	C	pp	TANK (pp) AP2A1
2319	C	pp	TANK (pp) PAFAH1B1
2320	E	pp	TANK (pp) CNOT1
2321	E	pp	TANK (pp) CHUK
2322	E	pp	TANK (pp) TRAF2
2323	E	pp	TANK (pp) IKBKG
2324	E	pp	TANK (pp) TXLNA
2325	E	pp	TANK (pp) TXLNG
2326	E	pp	TANK (pp) CEP135
2327	E	pp	TANK (pp) IKBKB
2328	E	pp	TANK (pp) CSNK1A1
2329	E	pp	TANK (pp) PICK1
2330	E	pp	TANK (pp) CSNK1D
2331	E	pp	TANK (pp) KIF7
2332	E	pp	TANK (pp) ULK3
2333	E	pp	TANK (pp) CCDC138
2334	E	pp	TANK (pp) NCAPG2
2335	E	pp	TANK (pp) PFDN5
2336	E	pp	TANK (pp) OBSL1
2337	E	pp	TANK (pp) NF2
2338	E	pp	TANK (pp) KIF2C
2339	E	pp	TANK (pp) GDI1
2340	E	pp	TANK (pp) FHL1
2341	F	pp	TANK (pp) TBK1
2342	F	pp	TANK (pp) AMOT
2343	F	pp	TANK (pp) TNIP1
2344	F	pp	TANK (pp) ACTG1
2345	F	pp	TANK (pp) TRAF3
2346	F	pp	TANK (pp) CEP131
2347	F	pp	TANK (pp) CKAP2
2348	G	pp	TANK (pp) PREP
2349	G	pp	TANK (pp) RNF41
2350	G	pp	TANK (pp) EIF3K
2351	G	pp	TANK (pp) FAM20C
2352	G	pp	TANK (pp) NAA50
2353	G	pp	TANK (pp) TRMT6
2354	G	pp	TANK (pp) IGHA1
2355	G	pp	TANK (pp) TNFAIP3
2356	I	pp	TANK (pp) RAB9A
2357	I	pp	TANK (pp) BAIAP2L1
2358	I	pp	TANK (pp) ULBP3
2359	I	pp	TANK (pp) GPSM1
2360	I	pp	TANK (pp) PFDN4
2361	I	pp	TANK (pp) UTP6
2362	I	pp	TANK (pp) HEATR1
2363	I	pp	TANK (pp) SDK2
2364	I	pp	TANK (pp) CCDC50
2365	I	pp	TANK (pp) TENM3
2366	I	pp	TANK (pp) AMOTL1
2367	I	pp	TANK (pp) TRIP6
2368	I	pp	TANK (pp) PRIM1
2369	I	pp	TANK (pp) TBC1D31
2370	I	pp	TANK (pp) TLDC1
2371	I	pp	TANK (pp) EPHB4
2372	I	pp	TANK (pp) CACNA2D2
2373	I	pp	TANK (pp) ZFAND2B
2374	I	pp	TANK (pp) ANAPC7
2375	I	pp	TANK (pp) ANXA4
2376	I	pp	TANK (pp) ATP5A1
2377	I	pp	TANK (pp) CNOT3
2378	I	pp	TANK (pp) CNTFR
2379	I	pp	TANK (pp) EPS8
2380	I	pp	TANK (pp) ERO1A
2381	I	pp	TANK (pp) FUBP3
2382	I	pp	TANK (pp) HAX1
2383	I	pp	TANK (pp) HIST2H3A
2384	I	pp	TANK (pp) IQCB1
2385	I	pp	TANK (pp) MDH2
2386	I	pp	TANK (pp) NEK2
2387	I	pp	TANK (pp) OFD1
2388	I	pp	TANK (pp) OTUD7B
2389	I	pp	TANK (pp) PLEC
2390	I	pp	TANK (pp) PPP2R5D
2391	I	pp	TANK (pp) SAPCD2
2392	I	pp	TANK (pp) SERPINB5
2393	I	pp	TANK (pp) SH3RF1
2394	I	pp	TANK (pp) SNAP47
2395	I	pp	TANK (pp) SPRR1B
2396	I	pp	TANK (pp) TRAF4
2397	I	pp	TANK (pp) UBASH3B
2398	I	pp	TANK (pp) CETN3
2399	I	pp	TANK (pp) INTS7
2400	I	pp	TANK (pp) KIF14
2401	I	pp	TANK (pp) PCSK5
2402	K	pp	TANK (pp) KIF5C
2403	K	pp	TANK (pp) OXSR1
2404	K	pp	TANK (pp) NOL6
2405	M	pp	TANK (pp) NCS1
2406	M	pp	TANK (pp) GIGYF2
2407	M	pp	TANK (pp) IQGAP3
2408	M	pp	TANK (pp) MOXD1
2409	M	pp	TANK (pp) KRT80
2410	O	pp	TANK (pp) HSPA2
2411	O	pp	TANK (pp) OGN
2412	O	pp	TANK (pp) CDC6
2413	O	pp	TANK (pp) TCEB1
2414	O	pp	TANK (pp) PLEKHB2
2415	Q	pp	TANK (pp) DYNC2H1
2416	Q	pp	TANK (pp) RAB11B
2417	Q	pp	TANK (pp) HABP2
2418	Q	pp	TANK (pp) FADD
2419	Q	pp	TANK (pp) MBTPS1
2420	Q	pp	TANK (pp) OIT3
2421	Q	pp	TANK (pp) JCHAIN
2422	Q	pp	TANK (pp) NPEPPSL1
2423	Q	pp	TANK (pp) PRSS3
2424	Q	pp	TANK (pp) RFC4
2425	Q	pp	TANK (pp) ADSS
2426	Q	pp	TANK (pp) CPS1
2427	Q	pp	TANK (pp) CAMK2B
2428	Q	pp	TANK (pp) HSPA13
2429	Q	pp	TANK (pp) MRC2
2430	Q	pp	TANK (pp) PPT1
2431	Q	pp	TANK (pp) SCPEP1
2432	C	pp	TNIP1 (pp) TBK1
2433	C	pp	TNIP1 (pp) NBR1
2434	C	pp	TNIP1 (pp) SEMA4G
2435	C	pp	TNIP1 (pp) OPTN
2436	D	pp	TNIP1 (pp) ULK3
2437	E	pp	TNIP1 (pp) UEVLD
2438	E	pp	TNIP1 (pp) MLF1
2439	E	pp	TNIP1 (pp) CD82
2440	F	pp	TNIP1 (pp) TAX1BP1
2441	F	pp	TNIP1 (pp) TNIP2
2442	G	pp	TNIP1 (pp) TNFAIP3
2443	G	pp	TNIP1 (pp) TNF
2444	G	pp	TNIP1 (pp) NDNF
2445	G	pp	TNIP1 (pp) COCH
2446	G	pp	TNIP1 (pp) HIST3H2BB
2447	G	pp	TNIP1 (pp) SET
2448	G	pp	TNIP1 (pp) SMOC1
2449	G	pp	TNIP1 (pp) TNFRSF1A
2450	H	pp	TNIP1 (pp) EIF3C
2451	H	pp	TNIP1 (pp) NID2
2452	I	pp	TNIP1 (pp) MYH11
2453	I	pp	TNIP1 (pp) ROR1
2454	I	pp	TNIP1 (pp) RNF115
2455	I	pp	TNIP1 (pp) UMAD1
2456	I	pp	TNIP1 (pp) CACNA2D2
2457	I	pp	TNIP1 (pp) MOXD1
2458	L	pp	TNIP1 (pp) PLEKHB2
2459	M	pp	TNIP1 (pp) TENM3
2460	O	pp	TNIP1 (pp) PJA2
2461	Q	pp	TNIP1 (pp) PODXL2
2462	Q	pp	TNIP1 (pp) EMILIN2
2463	Q	pp	TNIP1 (pp) TRADD
2464	Q	pp	TNIP1 (pp) HAPLN3
2465	Q	pp	TNIP1 (pp) LAMA4
2466	Q	pp	TNIP1 (pp) SPOCK3
2467	Q	pp	TNIP1 (pp) SULF2
2468	C	pp	FADD (pp) CSNK1A1
2469	C	pp	FADD (pp) NDNF
2470	C	pp	FADD (pp) CASP8
2471	C	pp	FADD (pp) ROBO2
2472	D	pp	FADD (pp) CCDC50
2473	E	pp	FADD (pp) RIPK1
2474	E	pp	FADD (pp) CSNK1D
2475	F	pp	FADD (pp) KIF2C
2476	F	pp	FADD (pp) TNIP1
2477	G	pp	FADD (pp) ACTG1
2478	G	pp	FADD (pp) S1PR2
2479	G	pp	FADD (pp) DLD
2480	G	pp	FADD (pp) IGHA1
2481	G	pp	FADD (pp) RNF41
2482	G	pp	FADD (pp) PREP
2483	H	pp	FADD (pp) ULK3
2484	I	pp	FADD (pp) DNAAF1
2485	I	pp	FADD (pp) NUPL2
2486	I	pp	FADD (pp) RHOQ
2487	I	pp	FADD (pp) IKBKG
2488	M	pp	FADD (pp) TNFAIP3
2489	N	pp	FADD (pp) SLC7A11
2490	Q	pp	FADD (pp) AKR7A2
2491	Q	pp	FADD (pp) ROR1
2492	Q	pp	FADD (pp) SDK2
2493	Q	pp	FADD (pp) EPB41L4B
2494	Q	pp	FADD (pp) GOLGA7B
2495	Q	pp	FADD (pp) CHUK
2496	Q	pp	FADD (pp) CKMT1A
2497	Q	pp	FADD (pp) PRDX4
2498	C	pp	TRADD (pp) FADD
2499	C	pp	TRADD (pp) RIPK1
2500	C	pp	TRADD (pp) TRAF3
2501	C	pp	TRADD (pp) CCAR2
2502	C	pp	TRADD (pp) CASP8
2503	C	pp	TRADD (pp) FAM188A
2504	C	pp	TRADD (pp) TNFAIP3
2505	C	pp	TRADD (pp) TNIP1
2506	C	pp	TRADD (pp) RNF115
2507	C	pp	TRADD (pp) PRPF4
2508	C	pp	TRADD (pp) PCOLCE2
2509	C	pp	TRADD (pp) POLR1A
2510	C	pp	TRADD (pp) RRP9
2511	C	pp	TRADD (pp) DENND5A
2512	C	pp	TRADD (pp) TENM3
2513	C	pp	TRADD (pp) EIF3C
2514	C	pp	TRADD (pp) UBE2V2
2515	E	pp	TRADD (pp) TRAF2
2516	F	pp	TRADD (pp) ULK3
2517	F	pp	TRADD (pp) UEVLD
2518	F	pp	TRADD (pp) PCSK5
2519	F	pp	TRADD (pp) IKBKG
2520	F	pp	TRADD (pp) NOL6
2521	G	pp	TRADD (pp) C1QTNF3
2522	H	pp	TRADD (pp) AFM
2523	I	pp	TRADD (pp) G3BP1
2524	I	pp	TRADD (pp) PLOD1
2525	I	pp	TRADD (pp) THOC2
2526	I	pp	TRADD (pp) AKR7A2
2527	I	pp	TRADD (pp) HNRNPCL2
2528	I	pp	TRADD (pp) RCC2
2529	I	pp	TRADD (pp) S1PR2
2530	I	pp	TRADD (pp) ANTXR1
2531	I	pp	TRADD (pp) CHPF
2532	I	pp	TRADD (pp) COASY
2533	I	pp	TRADD (pp) DUS3L
2534	I	pp	TRADD (pp) KLKB1
2535	I	pp	TRADD (pp) NLGN1
2536	I	pp	TRADD (pp) NUP85
2537	I	pp	TRADD (pp) OGN
2538	I	pp	TRADD (pp) RFC3
2539	I	pp	TRADD (pp) SRP19
2540	I	pp	TRADD (pp) HAPLN3
2541	I	pp	TRADD (pp) HERC4
2542	I	pp	TRADD (pp) PDPN
2543	I	pp	TRADD (pp) RANBP2
2544	I	pp	TRADD (pp) BIRC2
2545	I	pp	TRADD (pp) DRG1
2546	I	pp	TRADD (pp) PKN2
2547	I	pp	TRADD (pp) RBP4
2548	Q	pp	TRADD (pp) TNF
2549	Q	pp	TRADD (pp) CHST12
2550	Q	pp	TRADD (pp) THAP4
2551	C	pp	TRAF2 (pp) PSMB3
2552	D	pp	TRAF2 (pp) TBK1
2553	D	pp	TRAF2 (pp) ULK3
2554	E	pp	TRAF2 (pp) MLF1
2555	E	pp	TRAF2 (pp) MYH11
2556	E	pp	TRAF2 (pp) TRAF3
2557	E	pp	TRAF2 (pp) MOXD1
2558	E	pp	TRAF2 (pp) TROAP
2559	E	pp	TRAF2 (pp) TANK
2560	E	pp	TRAF2 (pp) DYRK1A
2561	E	pp	TRAF2 (pp) STAU2
2562	E	pp	TRAF2 (pp) FREM2
2563	F	pp	TRAF2 (pp) BIRC2
2564	F	pp	TRAF2 (pp) ACTG1
2565	F	pp	TRAF2 (pp) USP54
2566	F	pp	TRAF2 (pp) TRADD
2567	F	pp	TRAF2 (pp) DHFR
2568	F	pp	TRAF2 (pp) CD82
2569	G	pp	TRAF2 (pp) UEVLD
2570	G	pp	TRAF2 (pp) PLEKHB2
2571	G	pp	TRAF2 (pp) FZD7
2572	G	pp	TRAF2 (pp) TMEM178B
2573	G	pp	TRAF2 (pp) RAB9A
2574	G	pp	TRAF2 (pp) TNIP1
2575	G	pp	TRAF2 (pp) TNFRSF1A
2576	G	pp	TRAF2 (pp) RIPK1
2577	G	pp	TRAF2 (pp) PTBP2
2578	H	pp	TRAF2 (pp) TNF
2579	H	pp	TRAF2 (pp) KRT80
2580	H	pp	TRAF2 (pp) EPHA5
2581	H	pp	TRAF2 (pp) CEP85
2582	I	pp	TRAF2 (pp) C1orf122
2583	I	pp	TRAF2 (pp) VPS37D
2584	I	pp	TRAF2 (pp) PLEC
2585	I	pp	TRAF2 (pp) CPVL
2586	I	pp	TRAF2 (pp) IGHG1
2587	K	pp	TRAF2 (pp) EIF4G2
2588	K	pp	TRAF2 (pp) USP25
2589	K	pp	TRAF2 (pp) TNIP2
2590	K	pp	TRAF2 (pp) NCS1
2591	K	pp	TRAF2 (pp) FAM188A
2592	O	pp	TRAF2 (pp) UMAD1
2593	Q	pp	TRAF2 (pp) DENND5A
2594	Q	pp	TRAF2 (pp) SLC7A11
2595	Q	pp	TRAF2 (pp) TENM3
2596	Q	pp	TRAF2 (pp) CSNK1A1
2597	Q	pp	TRAF2 (pp) ZFAND6
2598	Q	pp	TRAF2 (pp) ARG1
2599	Q	pp	TRAF2 (pp) MAVS
2600	R	pp	TRAF2 (pp) TNFAIP3
2601	C	pp	TNFAIP3 (pp) TRAF2
2602	C	pp	TNFAIP3 (pp) PLEKHB2
2603	C	pp	TNFAIP3 (pp) C3orf58
2604	E	pp	TNFAIP3 (pp) KIF5C
2605	F	pp	TNFAIP3 (pp) TNIP1
2606	F	pp	TNFAIP3 (pp) TNIP2
2607	F	pp	TNFAIP3 (pp) TAX1BP1
2608	F	pp	TNFAIP3 (pp) TBK1
2609	F	pp	TNFAIP3 (pp) AZI2
2610	F	pp	TNFAIP3 (pp) ART4
2611	G	pp	TNFAIP3 (pp) RIPK1
2612	G	pp	TNFAIP3 (pp) SLC26A2
2613	G	pp	TNFAIP3 (pp) OPTN
2614	H	pp	TNFAIP3 (pp) TNFRSF1A
2615	H	pp	TNFAIP3 (pp) TRADD
2616	H	pp	TNFAIP3 (pp) FZD7
2617	I	pp	TNFAIP3 (pp) G3BP1
2618	I	pp	TNFAIP3 (pp) PCSK5
2619	I	pp	TNFAIP3 (pp) STAT1
2620	I	pp	TNFAIP3 (pp) CALCOCO2
2621	I	pp	TNFAIP3 (pp) HABP2
2622	I	pp	TNFAIP3 (pp) MYH11
2623	I	pp	TNFAIP3 (pp) PREP
2624	I	pp	TNFAIP3 (pp) TTR
2625	I	pp	TNFAIP3 (pp) RCC2
2626	I	pp	TNFAIP3 (pp) TNF
2627	Q	pp	TNFAIP3 (pp) S1PR2
2628	Q	pp	TNFAIP3 (pp) AFM
2629	Q	pp	TNFAIP3 (pp) GALNT1
2630	Q	pp	TNFAIP3 (pp) LRRC69
2631	Q	pp	TNFAIP3 (pp) SDK2
2632	Q	pp	TNFAIP3 (pp) SEPSECS
2633	F	pp	RNF31 (pp) RTN3
2634	G	pp	RNF31 (pp) TNIP1
2635	G	pp	RNF31 (pp) TNF
2636	H	pp	RNF31 (pp) TNFAIP3
2637	H	pp	RNF31 (pp) SPR
2638	I	pp	RNF31 (pp) REEP5
2639	I	pp	RNF31 (pp) GDI1
2640	I	pp	RNF31 (pp) GOLGA3
2641	I	pp	RNF31 (pp) DNAH8
2642	I	pp	RNF31 (pp) HM13
2643	I	pp	RNF31 (pp) CD82
2644	K	pp	RNF31 (pp) HNRNPCL2
2645	E	pp	IKBKG (pp) CHUK
2646	E	pp	IKBKG (pp) NF2
2647	E	pp	IKBKG (pp) TNRC6B
2648	E	pp	IKBKG (pp) ALMS1
2649	E	pp	IKBKG (pp) KIAA1671
2650	E	pp	IKBKG (pp) TNRC6A
2651	E	pp	IKBKG (pp) TBK1
2652	E	pp	IKBKG (pp) USP54
2653	E	pp	IKBKG (pp) MPP5
2654	E	pp	IKBKG (pp) RNF31
2655	E	pp	IKBKG (pp) CCDC14
2656	F	pp	IKBKG (pp) AMOT
2657	F	pp	IKBKG (pp) IKBKB
2658	F	pp	IKBKG (pp) CSNK1A1
2659	F	pp	IKBKG (pp) CSNK1D
2660	F	pp	IKBKG (pp) IDE
2661	G	pp	IKBKG (pp) ACTG1
2662	G	pp	IKBKG (pp) TNFAIP3
2663	H	pp	IKBKG (pp) TNF
2664	H	pp	IKBKG (pp) TNFRSF1A
2665	H	pp	IKBKG (pp) CYLD
2666	H	pp	IKBKG (pp) PLEKHB2
2667	I	pp	IKBKG (pp) FAM83H
2668	I	pp	IKBKG (pp) G3BP1
2669	I	pp	IKBKG (pp) PCSK5
2670	I	pp	IKBKG (pp) AKR7A2
2671	I	pp	IKBKG (pp) NTPCR
2672	I	pp	IKBKG (pp) MPHOSPH9
2673	I	pp	IKBKG (pp) NUP43
2674	I	pp	IKBKG (pp) TRIP6
2675	I	pp	IKBKG (pp) CCDC138
2676	L	pp	IKBKG (pp) TANK
2677	L	pp	IKBKG (pp) CDK4
2678	M	pp	IKBKG (pp) TNIP1
2679	O	pp	IKBKG (pp) AMOTL1
2680	Q	pp	IKBKG (pp) RIPK1
2681	Q	pp	IKBKG (pp) F10
2682	Q	pp	IKBKG (pp) LNX2
2683	Q	pp	IKBKG (pp) RADIL
2684	Q	pp	IKBKG (pp) TAB1
2685	R	pp	IKBKG (pp) TRADD
2686	C	pp	SHARPIN (pp) GDI1
2687	C	pp	SHARPIN (pp) TNIP2
2688	C	pp	SHARPIN (pp) TNIP1
2689	E	pp	SHARPIN (pp) RNF31
2690	E	pp	SHARPIN (pp) MAP3K7
2691	E	pp	SHARPIN (pp) TAB2
2692	E	pp	SHARPIN (pp) NCS1
2693	E	pp	SHARPIN (pp) TENM3
2694	E	pp	SHARPIN (pp) ULK3
2695	F	pp	SHARPIN (pp) TRAF3
2696	F	pp	SHARPIN (pp) TAB1
2697	G	pp	SHARPIN (pp) RAB9A
2698	G	pp	SHARPIN (pp) FZD7
2699	H	pp	SHARPIN (pp) TNF
2700	H	pp	SHARPIN (pp) ORAI1
2701	I	pp	SHARPIN (pp) TLDC1
2702	I	pp	SHARPIN (pp) VPS37D
2703	I	pp	SHARPIN (pp) LDOC1L
2704	I	pp	SHARPIN (pp) IKBKG
2705	I	pp	SHARPIN (pp) MKRN2
2706	I	pp	SHARPIN (pp) MKRN4P
2707	I	pp	SHARPIN (pp) PHB2
2708	J	pp	SHARPIN (pp) PDPN
2709	K	pp	SHARPIN (pp) RBCK1
2710	L	pp	SHARPIN (pp) ULBP3
2711	M	pp	SHARPIN (pp) DHFR
2712	M	pp	SHARPIN (pp) MOXD1
2713	M	pp	SHARPIN (pp) SEMA4G
2714	O	pp	SHARPIN (pp) HPRT1
2715	Q	pp	SHARPIN (pp) UMAD1
2716	Q	pp	SHARPIN (pp) TNFAIP3
2717	Q	pp	SHARPIN (pp) S1PR2
2718	Q	pp	SHARPIN (pp) UEVLD
2719	Q	pp	SHARPIN (pp) DNAJB4
2720	Q	pp	SHARPIN (pp) ZCCHC3
