# Supplementary material
Source: publisher figshare collection journal article supplement (https://springernature.figshare.com/ndownloader/files/12998375)
Supplement: Supplementary file 1 [file 12998375 › CytoscapeSession-2018_09_09-12_11/tables/1818-Extensive+network/SHARED_ATTRS-org.cytoscape.model.CyNode-1818+shared+node.cytable]

CyCSV-Version	1
SUID	Node code	PROTEIN NAME	shared name
java.lang.Long	java.lang.String	java.lang.String	java.lang.String
	mutable	mutable
1818 shared node
1844			REEP5
1845			AP2A2
1846			MSTO1
1847			MFI2
1848			CAPN15
1849	No link	UMAD1	UMAD1
1850			CPVL
1851	Bait	HOIL-1	RBCK1
1852			VPS37D
1853			PSMB3
1854			C1orf122
1855			PAFAH1B1
1856			AP2A1
1857			KIF14
1858	Possibly related	YOD1	YOD1
1859			INTS7
1860	Related	TRAF5	TRAF5
1861	Possibly related	CETN3	CETN3
1862			STK10
1863			UBASH3B
1864			SSNA1
1865	Related	TRAF4	TRAF4
1866			SERPINB4
1867			SPRR1B
1868			PELI1
1869			SNAP47
1870			PDPK1
1871			SH3RF1
1872			MIB1
1873			SERPINB5
1874			KRT15
1875			SAPCD2
1876			CCDC77
1877			PPP2R5D
1878			CALML3
1879			PLEC
1880	Possibly related	CCDC112	CCDC112
1881			OTUD7B
1882			NTPCR
1883	Possibly related	OFD1	OFD1
1884			SDCBP2
1885			NEK2
1886			PARVA
1887			MDH2
1888			NOC4L
1889			IQCB1
1890			RFC3
1891			HIST2H3A
1892			RQCD1
1893			HAX1
1894			IGKC
1895			ERO1A
1896			IGHG1
1897			EPS8
1898			AHNAK
1899			CNTFR
1900			SASS6
1901			CNOT3
1902	No link	UEV3	UEVLD
1903			ATP5A1
1904			ZNF598
1905			ANXA4
1906			TELO2
1907			ANAPC7
1908			DNAJB4
1909			ZFAND2B
1910			EIF4G2
1911			CACNA2D2
1912			ATP5B
1913			EPHB4
1914			PKN2
1915			TLDC1
1916			KRT79
1917			TBC1D31
1918			CNOT10
1919	Possibly related	PRIM1	PRIM1
1920			CEP95
1921	Possibly related	MLF1	MLF1
1922	Bait	cIAP1	BIRC2
1923			SDK2
1924	Possibly related	GSK3B	GSK3B
1925			HEATR1
1926			IVL
1927			UTP6
1928			GSK3A
1929			PFDN4
1930	Bait	ABIN2	TNIP2
1931			GPSM1
1932	Bait	TANK	TANK
1933			ROBO2
1934			BAIAP2L1
1935	No link	NDNF	NDNF
1936			RHOQ
1937	Possibly related	CK1α	CSNK1A1
1938			NUPL2
1939			UBE2V2
1940			DNAAF1
1941			EIF3C
1942	No link	TENM3	TENM3
1943			TRIP6
1944			DENND5A
1945			NUP43
1946			RRP9
1947			MPHOSPH9
1948			POLR1A
1949			PCOLCE2
1950			PRPF4
1951			FAM83H
1952	No link	RNF115	RNF115
1953			RBP4
1954	Bait	ABIN1	TNIP1
1955			DRG1
1956	Possibly related	MINDY3	FAM188A
1957			RANBP2
1958	Related	CASP8	CASP8
1959			PDPN
1960			CCAR2
1961			HERC4
1962	Related	TRAF3	TRAF3
1963			HAPLN3
1964	Related	RIP1	RIPK1
1965			SRP19
1966	Bait	FADD	FADD
1967	Bait	TRADD	TRADD
1968			OGN
1969			C3orf58
1970			NUP85
1971	Possibly related	EVT2	PLEKHB2
1972			NLGN1
1973	Bait	TRAF2	TRAF2
1974	Bait	A20	TNFAIP3
1975			KLKB1
1976			DUS3L
1977			COASY
1978			CHPF
1979			ANTXR1
1980			HNRNPCL2
1981	No link	AKR7A2	AKR7A2
1982			THOC2
1983			PLOD1
1984			RCC2
1985			TTR
1986			HABP2
1987	Related	NDP52	CALCOCO2
1988	Related	STAT1	STAT1
1989			G3BP1
1990			YTHDF3
1991			ORAI1
1992			SPR
1993			CEP85
1994			EPHA5
1995			KRT80
1996	Related	CYLD	CYLD
1997			AFM
1998			MYCBPAP
1999			LAMA4
2000			ZCCHC3
2001			VPS37A
2002			FUBP3
2003			NID2
2004			SDCCAG3
2005			SMOC1
2006			SET
2007			HIST3H2BB
2008			COCH
2009	Related	TNF	TNF
2010			PTBP2
2011	Related	TNFR1	TNFRSF1A
2012	No link	RAB9A	RAB9A
2013			TMEM178B
2014	No link	FZD7	FZD7
2015			TRMT6
2016			NAA50
2017			FAM20C
2018			EIF3K
2019			EFNA5
2020	No link	PEP	PREP
2021			RNF41
2022			SKA1
2023			IGHA1
2024			C14orf80
2025			DLD
2026			PTX3
2027	Possibly related	S1PR2	S1PR2
2028			C1QTNF3
2029			SPATA2L
2030			SLC26A2
2031			SULF2
2032			SPOCK3
2033			BAG4
2034			EMILIN2
2035	Related	TAB1	TAB1
2036			PODXL2
2037			RTN3
2038	No link	DHFR	DHFR
2039			ATP6AP2
2040	Related	MAVS	MAVS
2041			CKAP2
2042			ARG1
2043			CEP131
2044	Possibly related	AWP1	ZFAND6
2045	No link	ACTG1	ACTG1
2046			SCPEP1
2047			IDE
2048			PPT1
2049			MRC2
2050			HSPA13
2051			NOL6
2052			CAMK2B
2053			CPS1
2054	No link	PC5	PCSK5
2055			ADSS
2056			RFC4
2057			ART4
2058			PRSS3
2059	Related	NAP1	AZI2
2060			NPEPPSL1
2061	Related	TAX1BP1	TAX1BP1
2062			JCHAIN
2063			OIT3
2064			MBTPS1
2065			HBE1
2066	Possibly related	RAB11B	RAB11B
2067			CEP164
2068			DYNC2H1
2069			NCKAP5L
2070			PRDX4
2071			CKMT1A
2072			PRRC2A
2073			GOLGA7B
2074	Related	TRIM25	TRIM25
2075			EPB41L4B
2076	No link	AMOTL1	AMOTL1
2077			YLPM1
2078			RADIL
2079	No link	AMOT	AMOT
2080	Possibly related	LNX2	LNX2
2081			F10
2082			THAP4
2083	Related	TAB2	TAB2
2084			CHST12
2085	Related	TAK1	MAP3K7
2086			SEPSECS
2087	No link	NCS1	NCS1
2088			LRRC69
2089			KHNYN
2090			GALNT1
2091	Possibly related	KAI1	CD82
2092	No link	ULBP3	ULBP3
2093			LGR4
2094	Related	TRAF1	TRAF1
2095			FREM2
2096			STAU2
2097			DYRK1A
2098			PJA2
2099			HPRT1
2100	Possibly related	TROAP	TROAP
2101	No link	MOXD1	MOXD1
2102			TCEB1
2103	No link	MYH11	MYH11
2104			CDC6
2105			FHL1
2106			HSPA2
2107			KIF2C
2108			SLC7A11
2109			OBSL1
2110	Possibly related	PFD5	PFDN5
2111			NCAPG2
2112			CCDC138
2113			IQGAP3
2114			KIF7
2115			GIGYF2
2116			PICK1
2117	Related	IKKβ	IKBKB
2118	Possibly related	CEP135	CEP135
2119			CDK4
2120			TXLNG
2121	Possibly related	TXLNA	TXLNA
2122			YTHDF1
2123			CNOT1
2124			DTNA
2125	No link	CK1δ	CSNK1D
2126	No link	CCDC14	CCDC14
2127	Bait	HOIP	RNF31
2128			USP25
2129			MPP5
2130	No link	USP54	USP54
2131			OXSR1
2132			TNRC6A
2133			ALMS1
2134			TNRC6B
2135			CAPN1
2136	No link	Merlin	NF2
2137			GOLPH3
2138	Related	IKKα	CHUK
2139	Bait	NEMO	IKBKG
2140			RBM4
2141			KIF5C
2142			ROR1
2143			CCDC50
2144			PHB2
2145	No link	ULK3	ULK3
2146			MKRN4P
2147			KIAA1671
2148	Possibly related	MKRN2	MKRN2
2149			TRO
2150	Related	OPTN	OPTN
2151			LDOC1L
2152			SEMA4G
2153			NBR1
2154			HM13
2155	Related	TBK1	TBK1
2156			DNAH8
2157	Possibly related	GOLGA3	GOLGA3
2158	No link	GDI1	GDI1
2159	Bait	SHARPIN	SHARPIN
