# Supplementary material
Source: publisher figshare collection journal article supplement (https://springernature.figshare.com/ndownloader/files/12998375)
Supplement: Supplementary file 1 [file 12998375 › CytoscapeSession-2018_09_09-12_11/tables/1834-Extensive+network/HIDDEN-org.cytoscape.model.CyNetwork-1834+hidden+network.cytable]

"CyCSV-Version","1"
"SUID","layoutAlgorithm"
"java.lang.Long","java.lang.String"
"","mutable"
"1834 hidden network",""
"1834","Circular Layout"
