# Supplementary material
Source: publisher figshare collection journal article supplement (https://springernature.figshare.com/ndownloader/files/12998375)
Supplement: Supplementary file 1 [file 12998375 › CytoscapeSession-2018_09_09-12_11/tables/cytables.xml]

<?xml version="1.0" encoding="UTF-8" standalone="yes"?>
<cyTables>
    <virtualColumns>
        <virtualColumn immutable="false" targetJoinKey="SUID" targetTable="1818-Extensive+network/LOCAL_ATTRS-org.cytoscape.model.CyEdge-1818+default+edge.cytable" sourceJoinKey="SUID" sourceTable="1818-Extensive+network/SHARED_ATTRS-org.cytoscape.model.CyEdge-1818+shared+edge.cytable" sourceColumn="shared name" name="shared name"/>
        <virtualColumn immutable="false" targetJoinKey="SUID" targetTable="1818-Extensive+network/LOCAL_ATTRS-org.cytoscape.model.CyEdge-1818+default+edge.cytable" sourceJoinKey="SUID" sourceTable="1818-Extensive+network/SHARED_ATTRS-org.cytoscape.model.CyEdge-1818+shared+edge.cytable" sourceColumn="shared interaction" name="shared interaction"/>
        <virtualColumn immutable="false" targetJoinKey="SUID" targetTable="1818-Extensive+network/LOCAL_ATTRS-org.cytoscape.model.CyEdge-1818+default+edge.cytable" sourceJoinKey="SUID" sourceTable="1818-Extensive+network/SHARED_ATTRS-org.cytoscape.model.CyEdge-1818+shared+edge.cytable" sourceColumn="Identifier" name="Identifier"/>
        <virtualColumn immutable="false" targetJoinKey="SUID" targetTable="1834-Extensive+network/LOCAL_ATTRS-org.cytoscape.model.CyNode-Extensive+network+default+node.cytable" sourceJoinKey="SUID" sourceTable="1818-Extensive+network/SHARED_ATTRS-org.cytoscape.model.CyNode-1818+shared+node.cytable" sourceColumn="shared name" name="shared name"/>
        <virtualColumn immutable="false" targetJoinKey="SUID" targetTable="1834-Extensive+network/LOCAL_ATTRS-org.cytoscape.model.CyNode-Extensive+network+default+node.cytable" sourceJoinKey="SUID" sourceTable="1818-Extensive+network/SHARED_ATTRS-org.cytoscape.model.CyNode-1818+shared+node.cytable" sourceColumn="PROTEIN NAME" name="PROTEIN NAME"/>
        <virtualColumn immutable="false" targetJoinKey="SUID" targetTable="1834-Extensive+network/LOCAL_ATTRS-org.cytoscape.model.CyNode-Extensive+network+default+node.cytable" sourceJoinKey="SUID" sourceTable="1818-Extensive+network/SHARED_ATTRS-org.cytoscape.model.CyNode-1818+shared+node.cytable" sourceColumn="Node code" name="Node code"/>
        <virtualColumn immutable="false" targetJoinKey="SUID" targetTable="1834-Extensive+network/LOCAL_ATTRS-org.cytoscape.model.CyNetwork-Extensive+network+default+network.cytable" sourceJoinKey="SUID" sourceTable="1818-Extensive+network/SHARED_ATTRS-org.cytoscape.model.CyNetwork-1818+shared+network.cytable" sourceColumn="shared name" name="shared name"/>
        <virtualColumn immutable="false" targetJoinKey="SUID" targetTable="1834-Extensive+network/LOCAL_ATTRS-org.cytoscape.model.CyEdge-Extensive+network+default+edge.cytable" sourceJoinKey="SUID" sourceTable="1818-Extensive+network/SHARED_ATTRS-org.cytoscape.model.CyEdge-1818+shared+edge.cytable" sourceColumn="shared name" name="shared name"/>
        <virtualColumn immutable="false" targetJoinKey="SUID" targetTable="1834-Extensive+network/LOCAL_ATTRS-org.cytoscape.model.CyEdge-Extensive+network+default+edge.cytable" sourceJoinKey="SUID" sourceTable="1818-Extensive+network/SHARED_ATTRS-org.cytoscape.model.CyEdge-1818+shared+edge.cytable" sourceColumn="shared interaction" name="shared interaction"/>
        <virtualColumn immutable="false" targetJoinKey="SUID" targetTable="1834-Extensive+network/LOCAL_ATTRS-org.cytoscape.model.CyEdge-Extensive+network+default+edge.cytable" sourceJoinKey="SUID" sourceTable="1818-Extensive+network/SHARED_ATTRS-org.cytoscape.model.CyEdge-1818+shared+edge.cytable" sourceColumn="Identifier" name="Identifier"/>
        <virtualColumn immutable="false" targetJoinKey="SUID" targetTable="1818-Extensive+network/LOCAL_ATTRS-org.cytoscape.model.CyNode-1818+default+node.cytable" sourceJoinKey="SUID" sourceTable="1818-Extensive+network/SHARED_ATTRS-org.cytoscape.model.CyNode-1818+shared+node.cytable" sourceColumn="shared name" name="shared name"/>
        <virtualColumn immutable="false" targetJoinKey="SUID" targetTable="1818-Extensive+network/LOCAL_ATTRS-org.cytoscape.model.CyNode-1818+default+node.cytable" sourceJoinKey="SUID" sourceTable="1818-Extensive+network/SHARED_ATTRS-org.cytoscape.model.CyNode-1818+shared+node.cytable" sourceColumn="PROTEIN NAME" name="PROTEIN NAME"/>
        <virtualColumn immutable="false" targetJoinKey="SUID" targetTable="1818-Extensive+network/LOCAL_ATTRS-org.cytoscape.model.CyNode-1818+default+node.cytable" sourceJoinKey="SUID" sourceTable="1818-Extensive+network/SHARED_ATTRS-org.cytoscape.model.CyNode-1818+shared+node.cytable" sourceColumn="Node code" name="Node code"/>
        <virtualColumn immutable="false" targetJoinKey="SUID" targetTable="1818-Extensive+network/LOCAL_ATTRS-org.cytoscape.model.CyNetwork-1818+default+network.cytable" sourceJoinKey="SUID" sourceTable="1818-Extensive+network/SHARED_ATTRS-org.cytoscape.model.CyNetwork-1818+shared+network.cytable" sourceColumn="shared name" name="shared name"/>
    </virtualColumns>
</cyTables>
