# Supplementary material
Source: publisher figshare collection journal article supplement (https://springernature.figshare.com/ndownloader/files/12998375)
Supplement: Supplementary file 1 [file 12998375 › CytoscapeSession-2018_09_09-12_11/views/1834-2721-Extensive+network.xgmml]

<?xml version="1.0" encoding="UTF-8" standalone="yes"?>
<graph id="2721" label="Extensive network" cy:view="1" cy:networkId="1834" cy:visualStyle="default" cy:rendererId="org.cytoscape.ding" cy:documentVersion="3.0" xmlns:dc="http://purl.org/dc/elements/1.1/" xmlns:xlink="http://www.w3.org/1999/xlink" xmlns:rdf="http://www.w3.org/1999/02/22-rdf-syntax-ns#" xmlns:cy="http://www.cytoscape.org" xmlns="http://www.cs.rpi.edu/XGMML">
  <graphics>
    <att name="NETWORK_WIDTH" value="1500.0" type="string"/>
    <att name="NETWORK_CENTER_Z_LOCATION" value="0.0" type="string"/>
    <att name="NETWORK_SCALE_FACTOR" value="0.27376446150485445" type="string"/>
    <att name="NETWORK_CENTER_X_LOCATION" value="43.4531673969761" type="string"/>
    <att name="NETWORK_CENTER_Y_LOCATION" value="-677.3518503828494" type="string"/>
    <att name="NETWORK_HEIGHT" value="620.0" type="string"/>
    <att name="lockedVisualProperties" type="list">
      <att name="NETWORK_BACKGROUND_PAINT" value="#FFFFFF" type="string"/>
      <att name="NETWORK_DEPTH" value="0.0" type="string"/>
      <att name="NETWORK_NODE_SELECTION" value="true" type="string"/>
      <att name="NETWORK_TITLE" value="Extensive network" type="string"/>
      <att name="NETWORK_EDGE_SELECTION" value="true" type="string"/>
    </att>
  </graphics>
  <node id="2851" label="SULF2" cy:nodeId="2031">
    <graphics y="75.2468221609022" z="0.0" x="-769.5646362304688">
      <att name="lockedVisualProperties" type="list">
        <att name="NODE_NESTED_NETWORK_IMAGE_VISIBLE" value="true" type="string"/>
        <att name="NODE_CUSTOMGRAPHICS_SIZE_2" value="0.0" type="string"/>
        <att name="NODE_CUSTOMGRAPHICS_SIZE_6" value="0.0" type="string"/>
        <att name="NODE_BORDER_STROKE" value="SOLID" type="string"/>
        <att name="NODE_CUSTOMGRAPHICS_POSITION_7" value="C,C,c,0.00,0.00" type="string"/>
        <att name="NODE_CUSTOMGRAPHICS_8" value="org.cytoscape.ding.customgraphics.NullCustomGraphics,0,[ Remove Graphics ]," type="string"/>
        <att name="NODE_TRANSPARENCY" value="255" type="string"/>
        <att name="NODE_LABEL_WIDTH" value="200.0" type="string"/>
        <att name="NODE_CUSTOMGRAPHICS_SIZE_1" value="0.0" type="string"/>
        <att name="NODE_CUSTOMGRAPHICS_5" value="org.cytoscape.ding.customgraphics.NullCustomGraphics,0,[ Remove Graphics ]," type="string"/>
        <att name="NODE_CUSTOMGRAPHICS_9" value="org.cytoscape.ding.customgraphics.NullCustomGraphics,0,[ Remove Graphics ]," type="string"/>
        <att name="NODE_CUSTOMGRAPHICS_1" value="org.cytoscape.ding.customgraphics.NullCustomGraphics,0,[ Remove Graphics ]," type="string"/>
        <att name="NODE_CUSTOMGRAPHICS_POSITION_6" value="C,C,c,0.00,0.00" type="string"/>
        <att name="NODE_CUSTOMGRAPHICS_POSITION_2" value="C,C,c,0.00,0.00" type="string"/>
        <att name="NODE_SELECTED_PAINT" value="#FFFF00" type="string"/>
        <att name="NODE_HEIGHT" value="30.0" type="string"/>
        <att name="NODE_CUSTOMGRAPHICS_POSITION_8" value="C,C,c,0.00,0.00" type="string"/>
        <att name="NODE_CUSTOMGRAPHICS_POSITION_9" value="C,C,c,0.00,0.00" type="string"/>
        <att name="NODE_CUSTOMGRAPHICS_POSITION_1" value="C,C,c,0.00,0.00" type="string"/>
        <att name="NODE_BORDER_TRANSPARENCY" value="255" type="string"/>
        <att name="NODE_CUSTOMGRAPHICS_SIZE_3" value="0.0" type="string"/>
        <att name="NODE_CUSTOMGRAPHICS_3" value="org.cytoscape.ding.customgraphics.NullCustomGraphics,0,[ Remove Graphics ]," type="string"/>
        <att name="NODE_CUSTOMGRAPHICS_7" value="org.cytoscape.ding.customgraphics.NullCustomGraphics,0,[ Remove Graphics ]," type="string"/>
        <att name="NODE_CUSTOMGRAPHICS_SIZE_7" value="0.0" type="string"/>
        <att name="NODE_CUSTOMGRAPHICS_SIZE_8" value="0.0" type="string"/>
        <att name="NODE_CUSTOMGRAPHICS_POSITION_5" value="C,C,c,0.00,0.00" type="string"/>
        <att name="NODE_SHAPE" value="ROUND_RECTANGLE" type="string"/>
        <att name="NODE_SELECTED" value="false" type="string"/>
        <att name="NODE_DEPTH" value="0.0" type="string"/>
        <att name="NODE_CUSTOMGRAPHICS_SIZE_5" value="0.0" type="string"/>
        <att name="NODE_FILL_COLOR" value="#C8C8C8" type="string"/>
        <att name="NODE_VISIBLE" value="true" type="string"/>
        <att name="NODE_BORDER_WIDTH" value="0.0" type="string"/>
        <att name="NODE_TOOLTIP" value="" type="string"/>
        <att name="NODE_BORDER_PAINT" value="#006699" type="string"/>
        <att name="NODE_CUSTOMGRAPHICS_6" value="org.cytoscape.ding.customgraphics.NullCustomGraphics,0,[ Remove Graphics ]," type="string"/>
        <att name="NODE_WIDTH" value="80.0" type="string"/>
        <att name="NODE_CUSTOMGRAPHICS_POSITION_3" value="C,C,c,0.00,0.00" type="string"/>
        <att name="NODE_CUSTOMGRAPHICS_4" value="org.cytoscape.ding.customgraphics.NullCustomGraphics,0,[ Remove Graphics ]," type="string"/>
        <att name="NODE_LABEL_POSITION" value="C,C,c,0.00,0.00" type="string"/>
        <att name="NODE_LABEL_TRANSPARENCY" value="255" type="string"/>
        <att name="NODE_CUSTOMGRAPHICS_SIZE_4" value="0.0" type="string"/>
        <att name="NODE_CUSTOMGRAPHICS_2" value="org.cytoscape.ding.customgraphics.NullCustomGraphics,0,[ Remove Graphics ]," type="string"/>
        <att name="NODE_CUSTOMGRAPHICS_POSITION_4" value="C,C,c,0.00,0.00" type="string"/>
        <att name="NODE_LABEL_FONT_FACE" value="Dialog.plain,plain,18" type="string"/>
        <att name="NODE_CUSTOMGRAPHICS_SIZE_9" value="0.0" type="string"/>
        <att name="NODE_LABEL_COLOR" value="#000000" type="string"/>
        <att name="NODE_LABEL_FONT_SIZE" value="18" type="string"/>
        <att name="NODE_LABEL" value="SULF2" type="string"/>
      </att>
    </graphics>
  </node>
  <node id="2850" label="SPOCK3" cy:nodeId="2032">
    <graphics y="39.94623665948148" z="0.0" x="-772.9000244140625">
      <att name="lockedVisualProperties" type="list">
        <att name="NODE_NESTED_NETWORK_IMAGE_VISIBLE" value="true" type="string"/>
        <att name="NODE_CUSTOMGRAPHICS_SIZE_2" value="0.0" type="string"/>
        <att name="NODE_CUSTOMGRAPHICS_SIZE_6" value="0.0" type="string"/>
        <att name="NODE_BORDER_STROKE" value="SOLID" type="string"/>
        <att name="NODE_CUSTOMGRAPHICS_POSITION_7" value="C,C,c,0.00,0.00" type="string"/>
        <att name="NODE_CUSTOMGRAPHICS_8" value="org.cytoscape.ding.customgraphics.NullCustomGraphics,0,[ Remove Graphics ]," type="string"/>
        <att name="NODE_TRANSPARENCY" value="255" type="string"/>
        <att name="NODE_LABEL_WIDTH" value="200.0" type="string"/>
        <att name="NODE_CUSTOMGRAPHICS_SIZE_1" value="0.0" type="string"/>
        <att name="NODE_CUSTOMGRAPHICS_5" value="org.cytoscape.ding.customgraphics.NullCustomGraphics,0,[ Remove Graphics ]," type="string"/>
        <att name="NODE_CUSTOMGRAPHICS_9" value="org.cytoscape.ding.customgraphics.NullCustomGraphics,0,[ Remove Graphics ]," type="string"/>
        <att name="NODE_CUSTOMGRAPHICS_1" value="org.cytoscape.ding.customgraphics.NullCustomGraphics,0,[ Remove Graphics ]," type="string"/>
        <att name="NODE_CUSTOMGRAPHICS_POSITION_6" value="C,C,c,0.00,0.00" type="string"/>
        <att name="NODE_CUSTOMGRAPHICS_POSITION_2" value="C,C,c,0.00,0.00" type="string"/>
        <att name="NODE_SELECTED_PAINT" value="#FFFF00" type="string"/>
        <att name="NODE_HEIGHT" value="30.0" type="string"/>
        <att name="NODE_CUSTOMGRAPHICS_POSITION_8" value="C,C,c,0.00,0.00" type="string"/>
        <att name="NODE_CUSTOMGRAPHICS_POSITION_9" value="C,C,c,0.00,0.00" type="string"/>
        <att name="NODE_CUSTOMGRAPHICS_POSITION_1" value="C,C,c,0.00,0.00" type="string"/>
        <att name="NODE_BORDER_TRANSPARENCY" value="255" type="string"/>
        <att name="NODE_CUSTOMGRAPHICS_SIZE_3" value="0.0" type="string"/>
        <att name="NODE_CUSTOMGRAPHICS_3" value="org.cytoscape.ding.customgraphics.NullCustomGraphics,0,[ Remove Graphics ]," type="string"/>
        <att name="NODE_CUSTOMGRAPHICS_7" value="org.cytoscape.ding.customgraphics.NullCustomGraphics,0,[ Remove Graphics ]," type="string"/>
        <att name="NODE_CUSTOMGRAPHICS_SIZE_7" value="0.0" type="string"/>
        <att name="NODE_CUSTOMGRAPHICS_SIZE_8" value="0.0" type="string"/>
        <att name="NODE_CUSTOMGRAPHICS_POSITION_5" value="C,C,c,0.00,0.00" type="string"/>
        <att name="NODE_SHAPE" value="ROUND_RECTANGLE" type="string"/>
        <att name="NODE_SELECTED" value="false" type="string"/>
        <att name="NODE_DEPTH" value="0.0" type="string"/>
        <att name="NODE_CUSTOMGRAPHICS_SIZE_5" value="0.0" type="string"/>
        <att name="NODE_FILL_COLOR" value="#C8C8C8" type="string"/>
        <att name="NODE_VISIBLE" value="true" type="string"/>
        <att name="NODE_BORDER_WIDTH" value="0.0" type="string"/>
        <att name="NODE_TOOLTIP" value="" type="string"/>
        <att name="NODE_BORDER_PAINT" value="#006699" type="string"/>
        <att name="NODE_CUSTOMGRAPHICS_6" value="org.cytoscape.ding.customgraphics.NullCustomGraphics,0,[ Remove Graphics ]," type="string"/>
        <att name="NODE_WIDTH" value="80.0" type="string"/>
        <att name="NODE_CUSTOMGRAPHICS_POSITION_3" value="C,C,c,0.00,0.00" type="string"/>
        <att name="NODE_CUSTOMGRAPHICS_4" value="org.cytoscape.ding.customgraphics.NullCustomGraphics,0,[ Remove Graphics ]," type="string"/>
        <att name="NODE_LABEL_POSITION" value="C,C,c,0.00,0.00" type="string"/>
        <att name="NODE_LABEL_TRANSPARENCY" value="255" type="string"/>
        <att name="NODE_CUSTOMGRAPHICS_SIZE_4" value="0.0" type="string"/>
        <att name="NODE_CUSTOMGRAPHICS_2" value="org.cytoscape.ding.customgraphics.NullCustomGraphics,0,[ Remove Graphics ]," type="string"/>
        <att name="NODE_CUSTOMGRAPHICS_POSITION_4" value="C,C,c,0.00,0.00" type="string"/>
        <att name="NODE_LABEL_FONT_FACE" value="Dialog.plain,plain,18" type="string"/>
        <att name="NODE_CUSTOMGRAPHICS_SIZE_9" value="0.0" type="string"/>
        <att name="NODE_LABEL_COLOR" value="#000000" type="string"/>
        <att name="NODE_LABEL_FONT_SIZE" value="18" type="string"/>
        <att name="NODE_LABEL" value="SPOCK3" type="string"/>
      </att>
    </graphics>
  </node>
  <node id="2849" label="BAG4" cy:nodeId="2033">
    <graphics y="213.37341555706297" z="0.0" x="-1217.9182561958667">
      <att name="lockedVisualProperties" type="list">
        <att name="NODE_NESTED_NETWORK_IMAGE_VISIBLE" value="true" type="string"/>
        <att name="NODE_CUSTOMGRAPHICS_SIZE_2" value="0.0" type="string"/>
        <att name="NODE_CUSTOMGRAPHICS_SIZE_6" value="0.0" type="string"/>
        <att name="NODE_BORDER_STROKE" value="SOLID" type="string"/>
        <att name="NODE_CUSTOMGRAPHICS_POSITION_7" value="C,C,c,0.00,0.00" type="string"/>
        <att name="NODE_CUSTOMGRAPHICS_8" value="org.cytoscape.ding.customgraphics.NullCustomGraphics,0,[ Remove Graphics ]," type="string"/>
        <att name="NODE_TRANSPARENCY" value="255" type="string"/>
        <att name="NODE_LABEL_WIDTH" value="200.0" type="string"/>
        <att name="NODE_CUSTOMGRAPHICS_SIZE_1" value="0.0" type="string"/>
        <att name="NODE_CUSTOMGRAPHICS_5" value="org.cytoscape.ding.customgraphics.NullCustomGraphics,0,[ Remove Graphics ]," type="string"/>
        <att name="NODE_CUSTOMGRAPHICS_9" value="org.cytoscape.ding.customgraphics.NullCustomGraphics,0,[ Remove Graphics ]," type="string"/>
        <att name="NODE_CUSTOMGRAPHICS_1" value="org.cytoscape.ding.customgraphics.NullCustomGraphics,0,[ Remove Graphics ]," type="string"/>
        <att name="NODE_CUSTOMGRAPHICS_POSITION_6" value="C,C,c,0.00,0.00" type="string"/>
        <att name="NODE_CUSTOMGRAPHICS_POSITION_2" value="C,C,c,0.00,0.00" type="string"/>
        <att name="NODE_SELECTED_PAINT" value="#FFFF00" type="string"/>
        <att name="NODE_HEIGHT" value="30.0" type="string"/>
        <att name="NODE_CUSTOMGRAPHICS_POSITION_8" value="C,C,c,0.00,0.00" type="string"/>
        <att name="NODE_CUSTOMGRAPHICS_POSITION_9" value="C,C,c,0.00,0.00" type="string"/>
        <att name="NODE_CUSTOMGRAPHICS_POSITION_1" value="C,C,c,0.00,0.00" type="string"/>
        <att name="NODE_BORDER_TRANSPARENCY" value="255" type="string"/>
        <att name="NODE_CUSTOMGRAPHICS_SIZE_3" value="0.0" type="string"/>
        <att name="NODE_CUSTOMGRAPHICS_3" value="org.cytoscape.ding.customgraphics.NullCustomGraphics,0,[ Remove Graphics ]," type="string"/>
        <att name="NODE_CUSTOMGRAPHICS_7" value="org.cytoscape.ding.customgraphics.NullCustomGraphics,0,[ Remove Graphics ]," type="string"/>
        <att name="NODE_CUSTOMGRAPHICS_SIZE_7" value="0.0" type="string"/>
        <att name="NODE_CUSTOMGRAPHICS_SIZE_8" value="0.0" type="string"/>
        <att name="NODE_CUSTOMGRAPHICS_POSITION_5" value="C,C,c,0.00,0.00" type="string"/>
        <att name="NODE_SHAPE" value="ROUND_RECTANGLE" type="string"/>
        <att name="NODE_SELECTED" value="false" type="string"/>
        <att name="NODE_DEPTH" value="0.0" type="string"/>
        <att name="NODE_CUSTOMGRAPHICS_SIZE_5" value="0.0" type="string"/>
        <att name="NODE_FILL_COLOR" value="#C8C8C8" type="string"/>
        <att name="NODE_VISIBLE" value="true" type="string"/>
        <att name="NODE_BORDER_WIDTH" value="0.0" type="string"/>
        <att name="NODE_TOOLTIP" value="" type="string"/>
        <att name="NODE_BORDER_PAINT" value="#006699" type="string"/>
        <att name="NODE_CUSTOMGRAPHICS_6" value="org.cytoscape.ding.customgraphics.NullCustomGraphics,0,[ Remove Graphics ]," type="string"/>
        <att name="NODE_WIDTH" value="80.0" type="string"/>
        <att name="NODE_CUSTOMGRAPHICS_POSITION_3" value="C,C,c,0.00,0.00" type="string"/>
        <att name="NODE_CUSTOMGRAPHICS_4" value="org.cytoscape.ding.customgraphics.NullCustomGraphics,0,[ Remove Graphics ]," type="string"/>
        <att name="NODE_LABEL_POSITION" value="C,C,c,0.00,0.00" type="string"/>
        <att name="NODE_LABEL_TRANSPARENCY" value="255" type="string"/>
        <att name="NODE_CUSTOMGRAPHICS_SIZE_4" value="0.0" type="string"/>
        <att name="NODE_CUSTOMGRAPHICS_2" value="org.cytoscape.ding.customgraphics.NullCustomGraphics,0,[ Remove Graphics ]," type="string"/>
        <att name="NODE_CUSTOMGRAPHICS_POSITION_4" value="C,C,c,0.00,0.00" type="string"/>
        <att name="NODE_LABEL_FONT_FACE" value="Dialog.plain,plain,18" type="string"/>
        <att name="NODE_CUSTOMGRAPHICS_SIZE_9" value="0.0" type="string"/>
        <att name="NODE_LABEL_COLOR" value="#000000" type="string"/>
        <att name="NODE_LABEL_FONT_SIZE" value="18" type="string"/>
        <att name="NODE_LABEL" value="BAG4" type="string"/>
      </att>
    </graphics>
  </node>
  <node id="2848" label="EMILIN2" cy:nodeId="2034">
    <graphics y="-154.42344629020596" z="0.0" x="157.2010572515483">
      <att name="lockedVisualProperties" type="list">
        <att name="NODE_NESTED_NETWORK_IMAGE_VISIBLE" value="true" type="string"/>
        <att name="NODE_CUSTOMGRAPHICS_SIZE_2" value="0.0" type="string"/>
        <att name="NODE_CUSTOMGRAPHICS_SIZE_6" value="0.0" type="string"/>
        <att name="NODE_BORDER_STROKE" value="SOLID" type="string"/>
        <att name="NODE_CUSTOMGRAPHICS_POSITION_7" value="C,C,c,0.00,0.00" type="string"/>
        <att name="NODE_CUSTOMGRAPHICS_8" value="org.cytoscape.ding.customgraphics.NullCustomGraphics,0,[ Remove Graphics ]," type="string"/>
        <att name="NODE_TRANSPARENCY" value="255" type="string"/>
        <att name="NODE_LABEL_WIDTH" value="200.0" type="string"/>
        <att name="NODE_CUSTOMGRAPHICS_SIZE_1" value="0.0" type="string"/>
        <att name="NODE_CUSTOMGRAPHICS_5" value="org.cytoscape.ding.customgraphics.NullCustomGraphics,0,[ Remove Graphics ]," type="string"/>
        <att name="NODE_CUSTOMGRAPHICS_9" value="org.cytoscape.ding.customgraphics.NullCustomGraphics,0,[ Remove Graphics ]," type="string"/>
        <att name="NODE_CUSTOMGRAPHICS_1" value="org.cytoscape.ding.customgraphics.NullCustomGraphics,0,[ Remove Graphics ]," type="string"/>
        <att name="NODE_CUSTOMGRAPHICS_POSITION_6" value="C,C,c,0.00,0.00" type="string"/>
        <att name="NODE_CUSTOMGRAPHICS_POSITION_2" value="C,C,c,0.00,0.00" type="string"/>
        <att name="NODE_SELECTED_PAINT" value="#FFFF00" type="string"/>
        <att name="NODE_HEIGHT" value="30.0" type="string"/>
        <att name="NODE_CUSTOMGRAPHICS_POSITION_8" value="C,C,c,0.00,0.00" type="string"/>
        <att name="NODE_CUSTOMGRAPHICS_POSITION_9" value="C,C,c,0.00,0.00" type="string"/>
        <att name="NODE_CUSTOMGRAPHICS_POSITION_1" value="C,C,c,0.00,0.00" type="string"/>
        <att name="NODE_BORDER_TRANSPARENCY" value="255" type="string"/>
        <att name="NODE_CUSTOMGRAPHICS_SIZE_3" value="0.0" type="string"/>
        <att name="NODE_CUSTOMGRAPHICS_3" value="org.cytoscape.ding.customgraphics.NullCustomGraphics,0,[ Remove Graphics ]," type="string"/>
        <att name="NODE_CUSTOMGRAPHICS_7" value="org.cytoscape.ding.customgraphics.NullCustomGraphics,0,[ Remove Graphics ]," type="string"/>
        <att name="NODE_CUSTOMGRAPHICS_SIZE_7" value="0.0" type="string"/>
        <att name="NODE_CUSTOMGRAPHICS_SIZE_8" value="0.0" type="string"/>
        <att name="NODE_CUSTOMGRAPHICS_POSITION_5" value="C,C,c,0.00,0.00" type="string"/>
        <att name="NODE_SHAPE" value="ROUND_RECTANGLE" type="string"/>
        <att name="NODE_SELECTED" value="false" type="string"/>
        <att name="NODE_DEPTH" value="0.0" type="string"/>
        <att name="NODE_CUSTOMGRAPHICS_SIZE_5" value="0.0" type="string"/>
        <att name="NODE_FILL_COLOR" value="#C8C8C8" type="string"/>
        <att name="NODE_VISIBLE" value="true" type="string"/>
        <att name="NODE_BORDER_WIDTH" value="0.0" type="string"/>
        <att name="NODE_TOOLTIP" value="" type="string"/>
        <att name="NODE_BORDER_PAINT" value="#006699" type="string"/>
        <att name="NODE_CUSTOMGRAPHICS_6" value="org.cytoscape.ding.customgraphics.NullCustomGraphics,0,[ Remove Graphics ]," type="string"/>
        <att name="NODE_WIDTH" value="80.0" type="string"/>
        <att name="NODE_CUSTOMGRAPHICS_POSITION_3" value="C,C,c,0.00,0.00" type="string"/>
        <att name="NODE_CUSTOMGRAPHICS_4" value="org.cytoscape.ding.customgraphics.NullCustomGraphics,0,[ Remove Graphics ]," type="string"/>
        <att name="NODE_LABEL_POSITION" value="C,C,c,0.00,0.00" type="string"/>
        <att name="NODE_LABEL_TRANSPARENCY" value="255" type="string"/>
        <att name="NODE_CUSTOMGRAPHICS_SIZE_4" value="0.0" type="string"/>
        <att name="NODE_CUSTOMGRAPHICS_2" value="org.cytoscape.ding.customgraphics.NullCustomGraphics,0,[ Remove Graphics ]," type="string"/>
        <att name="NODE_CUSTOMGRAPHICS_POSITION_4" value="C,C,c,0.00,0.00" type="string"/>
        <att name="NODE_LABEL_FONT_FACE" value="Dialog.plain,plain,18" type="string"/>
        <att name="NODE_CUSTOMGRAPHICS_SIZE_9" value="0.0" type="string"/>
        <att name="NODE_LABEL_COLOR" value="#000000" type="string"/>
        <att name="NODE_LABEL_FONT_SIZE" value="18" type="string"/>
        <att name="NODE_LABEL" value="EMILIN2" type="string"/>
      </att>
    </graphics>
  </node>
  <node id="2847" label="TAB1" cy:nodeId="2035">
    <graphics y="-1021.884479887477" z="0.0" x="84.15687143088226">
      <att name="lockedVisualProperties" type="list">
        <att name="NODE_NESTED_NETWORK_IMAGE_VISIBLE" value="true" type="string"/>
        <att name="NODE_CUSTOMGRAPHICS_SIZE_2" value="0.0" type="string"/>
        <att name="NODE_CUSTOMGRAPHICS_SIZE_6" value="0.0" type="string"/>
        <att name="NODE_BORDER_STROKE" value="SOLID" type="string"/>
        <att name="NODE_CUSTOMGRAPHICS_POSITION_7" value="C,C,c,0.00,0.00" type="string"/>
        <att name="NODE_CUSTOMGRAPHICS_8" value="org.cytoscape.ding.customgraphics.NullCustomGraphics,0,[ Remove Graphics ]," type="string"/>
        <att name="NODE_TRANSPARENCY" value="255" type="string"/>
        <att name="NODE_LABEL_WIDTH" value="200.0" type="string"/>
        <att name="NODE_CUSTOMGRAPHICS_SIZE_1" value="0.0" type="string"/>
        <att name="NODE_CUSTOMGRAPHICS_5" value="org.cytoscape.ding.customgraphics.NullCustomGraphics,0,[ Remove Graphics ]," type="string"/>
        <att name="NODE_CUSTOMGRAPHICS_9" value="org.cytoscape.ding.customgraphics.NullCustomGraphics,0,[ Remove Graphics ]," type="string"/>
        <att name="NODE_CUSTOMGRAPHICS_1" value="org.cytoscape.ding.customgraphics.NullCustomGraphics,0,[ Remove Graphics ]," type="string"/>
        <att name="NODE_CUSTOMGRAPHICS_POSITION_6" value="C,C,c,0.00,0.00" type="string"/>
        <att name="NODE_CUSTOMGRAPHICS_POSITION_2" value="C,C,c,0.00,0.00" type="string"/>
        <att name="NODE_SELECTED_PAINT" value="#FFFF00" type="string"/>
        <att name="NODE_HEIGHT" value="30.0" type="string"/>
        <att name="NODE_CUSTOMGRAPHICS_POSITION_8" value="C,C,c,0.00,0.00" type="string"/>
        <att name="NODE_CUSTOMGRAPHICS_POSITION_9" value="C,C,c,0.00,0.00" type="string"/>
        <att name="NODE_CUSTOMGRAPHICS_POSITION_1" value="C,C,c,0.00,0.00" type="string"/>
        <att name="NODE_BORDER_TRANSPARENCY" value="255" type="string"/>
        <att name="NODE_CUSTOMGRAPHICS_SIZE_3" value="0.0" type="string"/>
        <att name="NODE_CUSTOMGRAPHICS_3" value="org.cytoscape.ding.customgraphics.NullCustomGraphics,0,[ Remove Graphics ]," type="string"/>
        <att name="NODE_CUSTOMGRAPHICS_7" value="org.cytoscape.ding.customgraphics.NullCustomGraphics,0,[ Remove Graphics ]," type="string"/>
        <att name="NODE_CUSTOMGRAPHICS_SIZE_7" value="0.0" type="string"/>
        <att name="NODE_CUSTOMGRAPHICS_SIZE_8" value="0.0" type="string"/>
        <att name="NODE_CUSTOMGRAPHICS_POSITION_5" value="C,C,c,0.00,0.00" type="string"/>
        <att name="NODE_SHAPE" value="ROUND_RECTANGLE" type="string"/>
        <att name="NODE_SELECTED" value="false" type="string"/>
        <att name="NODE_DEPTH" value="0.0" type="string"/>
        <att name="NODE_CUSTOMGRAPHICS_SIZE_5" value="0.0" type="string"/>
        <att name="NODE_FILL_COLOR" value="#FF9F1C" type="string"/>
        <att name="NODE_VISIBLE" value="true" type="string"/>
        <att name="NODE_BORDER_WIDTH" value="0.0" type="string"/>
        <att name="NODE_TOOLTIP" value="" type="string"/>
        <att name="NODE_BORDER_PAINT" value="#006699" type="string"/>
        <att name="NODE_CUSTOMGRAPHICS_6" value="org.cytoscape.ding.customgraphics.NullCustomGraphics,0,[ Remove Graphics ]," type="string"/>
        <att name="NODE_WIDTH" value="80.0" type="string"/>
        <att name="NODE_CUSTOMGRAPHICS_POSITION_3" value="C,C,c,0.00,0.00" type="string"/>
        <att name="NODE_CUSTOMGRAPHICS_4" value="org.cytoscape.ding.customgraphics.NullCustomGraphics,0,[ Remove Graphics ]," type="string"/>
        <att name="NODE_LABEL_POSITION" value="C,C,c,0.00,0.00" type="string"/>
        <att name="NODE_LABEL_TRANSPARENCY" value="255" type="string"/>
        <att name="NODE_CUSTOMGRAPHICS_SIZE_4" value="0.0" type="string"/>
        <att name="NODE_CUSTOMGRAPHICS_2" value="org.cytoscape.ding.customgraphics.NullCustomGraphics,0,[ Remove Graphics ]," type="string"/>
        <att name="NODE_CUSTOMGRAPHICS_POSITION_4" value="C,C,c,0.00,0.00" type="string"/>
        <att name="NODE_LABEL_FONT_FACE" value="Dialog.plain,plain,18" type="string"/>
        <att name="NODE_CUSTOMGRAPHICS_SIZE_9" value="0.0" type="string"/>
        <att name="NODE_LABEL_COLOR" value="#000000" type="string"/>
        <att name="NODE_LABEL_FONT_SIZE" value="18" type="string"/>
        <att name="NODE_LABEL" value="TAB1" type="string"/>
      </att>
    </graphics>
  </node>
  <node id="2846" label="PODXL2" cy:nodeId="2036">
    <graphics y="45.47135062079196" z="0.0" x="-871.9727172851562">
      <att name="lockedVisualProperties" type="list">
        <att name="NODE_NESTED_NETWORK_IMAGE_VISIBLE" value="true" type="string"/>
        <att name="NODE_CUSTOMGRAPHICS_SIZE_2" value="0.0" type="string"/>
        <att name="NODE_CUSTOMGRAPHICS_SIZE_6" value="0.0" type="string"/>
        <att name="NODE_BORDER_STROKE" value="SOLID" type="string"/>
        <att name="NODE_CUSTOMGRAPHICS_POSITION_7" value="C,C,c,0.00,0.00" type="string"/>
        <att name="NODE_CUSTOMGRAPHICS_8" value="org.cytoscape.ding.customgraphics.NullCustomGraphics,0,[ Remove Graphics ]," type="string"/>
        <att name="NODE_TRANSPARENCY" value="255" type="string"/>
        <att name="NODE_LABEL_WIDTH" value="200.0" type="string"/>
        <att name="NODE_CUSTOMGRAPHICS_SIZE_1" value="0.0" type="string"/>
        <att name="NODE_CUSTOMGRAPHICS_5" value="org.cytoscape.ding.customgraphics.NullCustomGraphics,0,[ Remove Graphics ]," type="string"/>
        <att name="NODE_CUSTOMGRAPHICS_9" value="org.cytoscape.ding.customgraphics.NullCustomGraphics,0,[ Remove Graphics ]," type="string"/>
        <att name="NODE_CUSTOMGRAPHICS_1" value="org.cytoscape.ding.customgraphics.NullCustomGraphics,0,[ Remove Graphics ]," type="string"/>
        <att name="NODE_CUSTOMGRAPHICS_POSITION_6" value="C,C,c,0.00,0.00" type="string"/>
        <att name="NODE_CUSTOMGRAPHICS_POSITION_2" value="C,C,c,0.00,0.00" type="string"/>
        <att name="NODE_SELECTED_PAINT" value="#FFFF00" type="string"/>
        <att name="NODE_HEIGHT" value="30.0" type="string"/>
        <att name="NODE_CUSTOMGRAPHICS_POSITION_8" value="C,C,c,0.00,0.00" type="string"/>
        <att name="NODE_CUSTOMGRAPHICS_POSITION_9" value="C,C,c,0.00,0.00" type="string"/>
        <att name="NODE_CUSTOMGRAPHICS_POSITION_1" value="C,C,c,0.00,0.00" type="string"/>
        <att name="NODE_BORDER_TRANSPARENCY" value="255" type="string"/>
        <att name="NODE_CUSTOMGRAPHICS_SIZE_3" value="0.0" type="string"/>
        <att name="NODE_CUSTOMGRAPHICS_3" value="org.cytoscape.ding.customgraphics.NullCustomGraphics,0,[ Remove Graphics ]," type="string"/>
        <att name="NODE_CUSTOMGRAPHICS_7" value="org.cytoscape.ding.customgraphics.NullCustomGraphics,0,[ Remove Graphics ]," type="string"/>
        <att name="NODE_CUSTOMGRAPHICS_SIZE_7" value="0.0" type="string"/>
        <att name="NODE_CUSTOMGRAPHICS_SIZE_8" value="0.0" type="string"/>
        <att name="NODE_CUSTOMGRAPHICS_POSITION_5" value="C,C,c,0.00,0.00" type="string"/>
        <att name="NODE_SHAPE" value="ROUND_RECTANGLE" type="string"/>
        <att name="NODE_SELECTED" value="false" type="string"/>
        <att name="NODE_DEPTH" value="0.0" type="string"/>
        <att name="NODE_CUSTOMGRAPHICS_SIZE_5" value="0.0" type="string"/>
        <att name="NODE_FILL_COLOR" value="#C8C8C8" type="string"/>
        <att name="NODE_VISIBLE" value="true" type="string"/>
        <att name="NODE_BORDER_WIDTH" value="0.0" type="string"/>
        <att name="NODE_TOOLTIP" value="" type="string"/>
        <att name="NODE_BORDER_PAINT" value="#006699" type="string"/>
        <att name="NODE_CUSTOMGRAPHICS_6" value="org.cytoscape.ding.customgraphics.NullCustomGraphics,0,[ Remove Graphics ]," type="string"/>
        <att name="NODE_WIDTH" value="80.0" type="string"/>
        <att name="NODE_CUSTOMGRAPHICS_POSITION_3" value="C,C,c,0.00,0.00" type="string"/>
        <att name="NODE_CUSTOMGRAPHICS_4" value="org.cytoscape.ding.customgraphics.NullCustomGraphics,0,[ Remove Graphics ]," type="string"/>
        <att name="NODE_LABEL_POSITION" value="C,C,c,0.00,0.00" type="string"/>
        <att name="NODE_LABEL_TRANSPARENCY" value="255" type="string"/>
        <att name="NODE_CUSTOMGRAPHICS_SIZE_4" value="0.0" type="string"/>
        <att name="NODE_CUSTOMGRAPHICS_2" value="org.cytoscape.ding.customgraphics.NullCustomGraphics,0,[ Remove Graphics ]," type="string"/>
        <att name="NODE_CUSTOMGRAPHICS_POSITION_4" value="C,C,c,0.00,0.00" type="string"/>
        <att name="NODE_LABEL_FONT_FACE" value="Dialog.plain,plain,18" type="string"/>
        <att name="NODE_CUSTOMGRAPHICS_SIZE_9" value="0.0" type="string"/>
        <att name="NODE_LABEL_COLOR" value="#000000" type="string"/>
        <att name="NODE_LABEL_FONT_SIZE" value="18" type="string"/>
        <att name="NODE_LABEL" value="PODXL2" type="string"/>
      </att>
    </graphics>
  </node>
  <node id="2845" label="RTN3" cy:nodeId="2037">
    <graphics y="274.89447021484375" z="0.0" x="1301.6663907051945">
      <att name="lockedVisualProperties" type="list">
        <att name="NODE_NESTED_NETWORK_IMAGE_VISIBLE" value="true" type="string"/>
        <att name="NODE_CUSTOMGRAPHICS_SIZE_2" value="0.0" type="string"/>
        <att name="NODE_CUSTOMGRAPHICS_SIZE_6" value="0.0" type="string"/>
        <att name="NODE_BORDER_STROKE" value="SOLID" type="string"/>
        <att name="NODE_CUSTOMGRAPHICS_POSITION_7" value="C,C,c,0.00,0.00" type="string"/>
        <att name="NODE_CUSTOMGRAPHICS_8" value="org.cytoscape.ding.customgraphics.NullCustomGraphics,0,[ Remove Graphics ]," type="string"/>
        <att name="NODE_TRANSPARENCY" value="255" type="string"/>
        <att name="NODE_LABEL_WIDTH" value="200.0" type="string"/>
        <att name="NODE_CUSTOMGRAPHICS_SIZE_1" value="0.0" type="string"/>
        <att name="NODE_CUSTOMGRAPHICS_5" value="org.cytoscape.ding.customgraphics.NullCustomGraphics,0,[ Remove Graphics ]," type="string"/>
        <att name="NODE_CUSTOMGRAPHICS_9" value="org.cytoscape.ding.customgraphics.NullCustomGraphics,0,[ Remove Graphics ]," type="string"/>
        <att name="NODE_CUSTOMGRAPHICS_1" value="org.cytoscape.ding.customgraphics.NullCustomGraphics,0,[ Remove Graphics ]," type="string"/>
        <att name="NODE_CUSTOMGRAPHICS_POSITION_6" value="C,C,c,0.00,0.00" type="string"/>
        <att name="NODE_CUSTOMGRAPHICS_POSITION_2" value="C,C,c,0.00,0.00" type="string"/>
        <att name="NODE_SELECTED_PAINT" value="#FFFF00" type="string"/>
        <att name="NODE_HEIGHT" value="30.0" type="string"/>
        <att name="NODE_CUSTOMGRAPHICS_POSITION_8" value="C,C,c,0.00,0.00" type="string"/>
        <att name="NODE_CUSTOMGRAPHICS_POSITION_9" value="C,C,c,0.00,0.00" type="string"/>
        <att name="NODE_CUSTOMGRAPHICS_POSITION_1" value="C,C,c,0.00,0.00" type="string"/>
        <att name="NODE_BORDER_TRANSPARENCY" value="255" type="string"/>
        <att name="NODE_CUSTOMGRAPHICS_SIZE_3" value="0.0" type="string"/>
        <att name="NODE_CUSTOMGRAPHICS_3" value="org.cytoscape.ding.customgraphics.NullCustomGraphics,0,[ Remove Graphics ]," type="string"/>
        <att name="NODE_CUSTOMGRAPHICS_7" value="org.cytoscape.ding.customgraphics.NullCustomGraphics,0,[ Remove Graphics ]," type="string"/>
        <att name="NODE_CUSTOMGRAPHICS_SIZE_7" value="0.0" type="string"/>
        <att name="NODE_CUSTOMGRAPHICS_SIZE_8" value="0.0" type="string"/>
        <att name="NODE_CUSTOMGRAPHICS_POSITION_5" value="C,C,c,0.00,0.00" type="string"/>
        <att name="NODE_SHAPE" value="ROUND_RECTANGLE" type="string"/>
        <att name="NODE_SELECTED" value="false" type="string"/>
        <att name="NODE_DEPTH" value="0.0" type="string"/>
        <att name="NODE_CUSTOMGRAPHICS_SIZE_5" value="0.0" type="string"/>
        <att name="NODE_FILL_COLOR" value="#C8C8C8" type="string"/>
        <att name="NODE_VISIBLE" value="true" type="string"/>
        <att name="NODE_BORDER_WIDTH" value="0.0" type="string"/>
        <att name="NODE_TOOLTIP" value="" type="string"/>
        <att name="NODE_BORDER_PAINT" value="#006699" type="string"/>
        <att name="NODE_CUSTOMGRAPHICS_6" value="org.cytoscape.ding.customgraphics.NullCustomGraphics,0,[ Remove Graphics ]," type="string"/>
        <att name="NODE_WIDTH" value="80.0" type="string"/>
        <att name="NODE_CUSTOMGRAPHICS_POSITION_3" value="C,C,c,0.00,0.00" type="string"/>
        <att name="NODE_CUSTOMGRAPHICS_4" value="org.cytoscape.ding.customgraphics.NullCustomGraphics,0,[ Remove Graphics ]," type="string"/>
        <att name="NODE_LABEL_POSITION" value="C,C,c,0.00,0.00" type="string"/>
        <att name="NODE_LABEL_TRANSPARENCY" value="255" type="string"/>
        <att name="NODE_CUSTOMGRAPHICS_SIZE_4" value="0.0" type="string"/>
        <att name="NODE_CUSTOMGRAPHICS_2" value="org.cytoscape.ding.customgraphics.NullCustomGraphics,0,[ Remove Graphics ]," type="string"/>
        <att name="NODE_CUSTOMGRAPHICS_POSITION_4" value="C,C,c,0.00,0.00" type="string"/>
        <att name="NODE_LABEL_FONT_FACE" value="Dialog.plain,plain,18" type="string"/>
        <att name="NODE_CUSTOMGRAPHICS_SIZE_9" value="0.0" type="string"/>
        <att name="NODE_LABEL_COLOR" value="#000000" type="string"/>
        <att name="NODE_LABEL_FONT_SIZE" value="18" type="string"/>
        <att name="NODE_LABEL" value="RTN3" type="string"/>
      </att>
    </graphics>
  </node>
  <node id="2844" label="DHFR" cy:nodeId="2038">
    <graphics y="302.7696384265909" z="0.0" x="65.80582409725142">
      <att name="lockedVisualProperties" type="list">
        <att name="NODE_NESTED_NETWORK_IMAGE_VISIBLE" value="true" type="string"/>
        <att name="NODE_CUSTOMGRAPHICS_SIZE_2" value="0.0" type="string"/>
        <att name="NODE_CUSTOMGRAPHICS_SIZE_6" value="0.0" type="string"/>
        <att name="NODE_BORDER_STROKE" value="SOLID" type="string"/>
        <att name="NODE_CUSTOMGRAPHICS_POSITION_7" value="C,C,c,0.00,0.00" type="string"/>
        <att name="NODE_CUSTOMGRAPHICS_8" value="org.cytoscape.ding.customgraphics.NullCustomGraphics,0,[ Remove Graphics ]," type="string"/>
        <att name="NODE_TRANSPARENCY" value="255" type="string"/>
        <att name="NODE_LABEL_WIDTH" value="200.0" type="string"/>
        <att name="NODE_CUSTOMGRAPHICS_SIZE_1" value="0.0" type="string"/>
        <att name="NODE_CUSTOMGRAPHICS_5" value="org.cytoscape.ding.customgraphics.NullCustomGraphics,0,[ Remove Graphics ]," type="string"/>
        <att name="NODE_CUSTOMGRAPHICS_9" value="org.cytoscape.ding.customgraphics.NullCustomGraphics,0,[ Remove Graphics ]," type="string"/>
        <att name="NODE_CUSTOMGRAPHICS_1" value="org.cytoscape.ding.customgraphics.NullCustomGraphics,0,[ Remove Graphics ]," type="string"/>
        <att name="NODE_CUSTOMGRAPHICS_POSITION_6" value="C,C,c,0.00,0.00" type="string"/>
        <att name="NODE_CUSTOMGRAPHICS_POSITION_2" value="C,C,c,0.00,0.00" type="string"/>
        <att name="NODE_SELECTED_PAINT" value="#FFFF00" type="string"/>
        <att name="NODE_HEIGHT" value="30.0" type="string"/>
        <att name="NODE_CUSTOMGRAPHICS_POSITION_8" value="C,C,c,0.00,0.00" type="string"/>
        <att name="NODE_CUSTOMGRAPHICS_POSITION_9" value="C,C,c,0.00,0.00" type="string"/>
        <att name="NODE_CUSTOMGRAPHICS_POSITION_1" value="C,C,c,0.00,0.00" type="string"/>
        <att name="NODE_BORDER_TRANSPARENCY" value="255" type="string"/>
        <att name="NODE_CUSTOMGRAPHICS_SIZE_3" value="0.0" type="string"/>
        <att name="NODE_CUSTOMGRAPHICS_3" value="org.cytoscape.ding.customgraphics.NullCustomGraphics,0,[ Remove Graphics ]," type="string"/>
        <att name="NODE_CUSTOMGRAPHICS_7" value="org.cytoscape.ding.customgraphics.NullCustomGraphics,0,[ Remove Graphics ]," type="string"/>
        <att name="NODE_CUSTOMGRAPHICS_SIZE_7" value="0.0" type="string"/>
        <att name="NODE_CUSTOMGRAPHICS_SIZE_8" value="0.0" type="string"/>
        <att name="NODE_CUSTOMGRAPHICS_POSITION_5" value="C,C,c,0.00,0.00" type="string"/>
        <att name="NODE_SHAPE" value="ROUND_RECTANGLE" type="string"/>
        <att name="NODE_SELECTED" value="false" type="string"/>
        <att name="NODE_DEPTH" value="0.0" type="string"/>
        <att name="NODE_CUSTOMGRAPHICS_SIZE_5" value="0.0" type="string"/>
        <att name="NODE_FILL_COLOR" value="#C8C8C8" type="string"/>
        <att name="NODE_VISIBLE" value="true" type="string"/>
        <att name="NODE_BORDER_WIDTH" value="0.0" type="string"/>
        <att name="NODE_TOOLTIP" value="" type="string"/>
        <att name="NODE_BORDER_PAINT" value="#006699" type="string"/>
        <att name="NODE_CUSTOMGRAPHICS_6" value="org.cytoscape.ding.customgraphics.NullCustomGraphics,0,[ Remove Graphics ]," type="string"/>
        <att name="NODE_WIDTH" value="80.0" type="string"/>
        <att name="NODE_CUSTOMGRAPHICS_POSITION_3" value="C,C,c,0.00,0.00" type="string"/>
        <att name="NODE_CUSTOMGRAPHICS_4" value="org.cytoscape.ding.customgraphics.NullCustomGraphics,0,[ Remove Graphics ]," type="string"/>
        <att name="NODE_LABEL_POSITION" value="C,C,c,0.00,0.00" type="string"/>
        <att name="NODE_LABEL_TRANSPARENCY" value="255" type="string"/>
        <att name="NODE_CUSTOMGRAPHICS_SIZE_4" value="0.0" type="string"/>
        <att name="NODE_CUSTOMGRAPHICS_2" value="org.cytoscape.ding.customgraphics.NullCustomGraphics,0,[ Remove Graphics ]," type="string"/>
        <att name="NODE_CUSTOMGRAPHICS_POSITION_4" value="C,C,c,0.00,0.00" type="string"/>
        <att name="NODE_LABEL_FONT_FACE" value="Dialog.plain,plain,18" type="string"/>
        <att name="NODE_CUSTOMGRAPHICS_SIZE_9" value="0.0" type="string"/>
        <att name="NODE_LABEL_COLOR" value="#000000" type="string"/>
        <att name="NODE_LABEL_FONT_SIZE" value="18" type="string"/>
        <att name="NODE_LABEL" value="DHFR" type="string"/>
      </att>
    </graphics>
  </node>
  <node id="2843" label="ATP6AP2" cy:nodeId="2039">
    <graphics y="-269.47936811440866" z="0.0" x="1131.4578227042525">
      <att name="lockedVisualProperties" type="list">
        <att name="NODE_NESTED_NETWORK_IMAGE_VISIBLE" value="true" type="string"/>
        <att name="NODE_CUSTOMGRAPHICS_SIZE_2" value="0.0" type="string"/>
        <att name="NODE_CUSTOMGRAPHICS_SIZE_6" value="0.0" type="string"/>
        <att name="NODE_BORDER_STROKE" value="SOLID" type="string"/>
        <att name="NODE_CUSTOMGRAPHICS_POSITION_7" value="C,C,c,0.00,0.00" type="string"/>
        <att name="NODE_CUSTOMGRAPHICS_8" value="org.cytoscape.ding.customgraphics.NullCustomGraphics,0,[ Remove Graphics ]," type="string"/>
        <att name="NODE_TRANSPARENCY" value="255" type="string"/>
        <att name="NODE_LABEL_WIDTH" value="200.0" type="string"/>
        <att name="NODE_CUSTOMGRAPHICS_SIZE_1" value="0.0" type="string"/>
        <att name="NODE_CUSTOMGRAPHICS_5" value="org.cytoscape.ding.customgraphics.NullCustomGraphics,0,[ Remove Graphics ]," type="string"/>
        <att name="NODE_CUSTOMGRAPHICS_9" value="org.cytoscape.ding.customgraphics.NullCustomGraphics,0,[ Remove Graphics ]," type="string"/>
        <att name="NODE_CUSTOMGRAPHICS_1" value="org.cytoscape.ding.customgraphics.NullCustomGraphics,0,[ Remove Graphics ]," type="string"/>
        <att name="NODE_CUSTOMGRAPHICS_POSITION_6" value="C,C,c,0.00,0.00" type="string"/>
        <att name="NODE_CUSTOMGRAPHICS_POSITION_2" value="C,C,c,0.00,0.00" type="string"/>
        <att name="NODE_SELECTED_PAINT" value="#FFFF00" type="string"/>
        <att name="NODE_HEIGHT" value="30.0" type="string"/>
        <att name="NODE_CUSTOMGRAPHICS_POSITION_8" value="C,C,c,0.00,0.00" type="string"/>
        <att name="NODE_CUSTOMGRAPHICS_POSITION_9" value="C,C,c,0.00,0.00" type="string"/>
        <att name="NODE_CUSTOMGRAPHICS_POSITION_1" value="C,C,c,0.00,0.00" type="string"/>
        <att name="NODE_BORDER_TRANSPARENCY" value="255" type="string"/>
        <att name="NODE_CUSTOMGRAPHICS_SIZE_3" value="0.0" type="string"/>
        <att name="NODE_CUSTOMGRAPHICS_3" value="org.cytoscape.ding.customgraphics.NullCustomGraphics,0,[ Remove Graphics ]," type="string"/>
        <att name="NODE_CUSTOMGRAPHICS_7" value="org.cytoscape.ding.customgraphics.NullCustomGraphics,0,[ Remove Graphics ]," type="string"/>
        <att name="NODE_CUSTOMGRAPHICS_SIZE_7" value="0.0" type="string"/>
        <att name="NODE_CUSTOMGRAPHICS_SIZE_8" value="0.0" type="string"/>
        <att name="NODE_CUSTOMGRAPHICS_POSITION_5" value="C,C,c,0.00,0.00" type="string"/>
        <att name="NODE_SHAPE" value="ROUND_RECTANGLE" type="string"/>
        <att name="NODE_SELECTED" value="false" type="string"/>
        <att name="NODE_DEPTH" value="0.0" type="string"/>
        <att name="NODE_CUSTOMGRAPHICS_SIZE_5" value="0.0" type="string"/>
        <att name="NODE_FILL_COLOR" value="#C8C8C8" type="string"/>
        <att name="NODE_VISIBLE" value="true" type="string"/>
        <att name="NODE_BORDER_WIDTH" value="0.0" type="string"/>
        <att name="NODE_TOOLTIP" value="" type="string"/>
        <att name="NODE_BORDER_PAINT" value="#006699" type="string"/>
        <att name="NODE_CUSTOMGRAPHICS_6" value="org.cytoscape.ding.customgraphics.NullCustomGraphics,0,[ Remove Graphics ]," type="string"/>
        <att name="NODE_WIDTH" value="80.0" type="string"/>
        <att name="NODE_CUSTOMGRAPHICS_POSITION_3" value="C,C,c,0.00,0.00" type="string"/>
        <att name="NODE_CUSTOMGRAPHICS_4" value="org.cytoscape.ding.customgraphics.NullCustomGraphics,0,[ Remove Graphics ]," type="string"/>
        <att name="NODE_LABEL_POSITION" value="C,C,c,0.00,0.00" type="string"/>
        <att name="NODE_LABEL_TRANSPARENCY" value="255" type="string"/>
        <att name="NODE_CUSTOMGRAPHICS_SIZE_4" value="0.0" type="string"/>
        <att name="NODE_CUSTOMGRAPHICS_2" value="org.cytoscape.ding.customgraphics.NullCustomGraphics,0,[ Remove Graphics ]," type="string"/>
        <att name="NODE_CUSTOMGRAPHICS_POSITION_4" value="C,C,c,0.00,0.00" type="string"/>
        <att name="NODE_LABEL_FONT_FACE" value="Dialog.plain,plain,18" type="string"/>
        <att name="NODE_CUSTOMGRAPHICS_SIZE_9" value="0.0" type="string"/>
        <att name="NODE_LABEL_COLOR" value="#000000" type="string"/>
        <att name="NODE_LABEL_FONT_SIZE" value="18" type="string"/>
        <att name="NODE_LABEL" value="ATP6AP2" type="string"/>
      </att>
    </graphics>
  </node>
  <node id="2842" label="MAVS" cy:nodeId="2040">
    <graphics y="-1011.9207260969415" z="0.0" x="898.3802490234375">
      <att name="lockedVisualProperties" type="list">
        <att name="NODE_NESTED_NETWORK_IMAGE_VISIBLE" value="true" type="string"/>
        <att name="NODE_CUSTOMGRAPHICS_SIZE_2" value="0.0" type="string"/>
        <att name="NODE_CUSTOMGRAPHICS_SIZE_6" value="0.0" type="string"/>
        <att name="NODE_BORDER_STROKE" value="SOLID" type="string"/>
        <att name="NODE_CUSTOMGRAPHICS_POSITION_7" value="C,C,c,0.00,0.00" type="string"/>
        <att name="NODE_CUSTOMGRAPHICS_8" value="org.cytoscape.ding.customgraphics.NullCustomGraphics,0,[ Remove Graphics ]," type="string"/>
        <att name="NODE_TRANSPARENCY" value="255" type="string"/>
        <att name="NODE_LABEL_WIDTH" value="200.0" type="string"/>
        <att name="NODE_CUSTOMGRAPHICS_SIZE_1" value="0.0" type="string"/>
        <att name="NODE_CUSTOMGRAPHICS_5" value="org.cytoscape.ding.customgraphics.NullCustomGraphics,0,[ Remove Graphics ]," type="string"/>
        <att name="NODE_CUSTOMGRAPHICS_9" value="org.cytoscape.ding.customgraphics.NullCustomGraphics,0,[ Remove Graphics ]," type="string"/>
        <att name="NODE_CUSTOMGRAPHICS_1" value="org.cytoscape.ding.customgraphics.NullCustomGraphics,0,[ Remove Graphics ]," type="string"/>
        <att name="NODE_CUSTOMGRAPHICS_POSITION_6" value="C,C,c,0.00,0.00" type="string"/>
        <att name="NODE_CUSTOMGRAPHICS_POSITION_2" value="C,C,c,0.00,0.00" type="string"/>
        <att name="NODE_SELECTED_PAINT" value="#FFFF00" type="string"/>
        <att name="NODE_HEIGHT" value="30.0" type="string"/>
        <att name="NODE_CUSTOMGRAPHICS_POSITION_8" value="C,C,c,0.00,0.00" type="string"/>
        <att name="NODE_CUSTOMGRAPHICS_POSITION_9" value="C,C,c,0.00,0.00" type="string"/>
        <att name="NODE_CUSTOMGRAPHICS_POSITION_1" value="C,C,c,0.00,0.00" type="string"/>
        <att name="NODE_BORDER_TRANSPARENCY" value="255" type="string"/>
        <att name="NODE_CUSTOMGRAPHICS_SIZE_3" value="0.0" type="string"/>
        <att name="NODE_CUSTOMGRAPHICS_3" value="org.cytoscape.ding.customgraphics.NullCustomGraphics,0,[ Remove Graphics ]," type="string"/>
        <att name="NODE_CUSTOMGRAPHICS_7" value="org.cytoscape.ding.customgraphics.NullCustomGraphics,0,[ Remove Graphics ]," type="string"/>
        <att name="NODE_CUSTOMGRAPHICS_SIZE_7" value="0.0" type="string"/>
        <att name="NODE_CUSTOMGRAPHICS_SIZE_8" value="0.0" type="string"/>
        <att name="NODE_CUSTOMGRAPHICS_POSITION_5" value="C,C,c,0.00,0.00" type="string"/>
        <att name="NODE_SHAPE" value="ROUND_RECTANGLE" type="string"/>
        <att name="NODE_SELECTED" value="false" type="string"/>
        <att name="NODE_DEPTH" value="0.0" type="string"/>
        <att name="NODE_CUSTOMGRAPHICS_SIZE_5" value="0.0" type="string"/>
        <att name="NODE_FILL_COLOR" value="#FF9F1C" type="string"/>
        <att name="NODE_VISIBLE" value="true" type="string"/>
        <att name="NODE_BORDER_WIDTH" value="0.0" type="string"/>
        <att name="NODE_TOOLTIP" value="" type="string"/>
        <att name="NODE_BORDER_PAINT" value="#006699" type="string"/>
        <att name="NODE_CUSTOMGRAPHICS_6" value="org.cytoscape.ding.customgraphics.NullCustomGraphics,0,[ Remove Graphics ]," type="string"/>
        <att name="NODE_WIDTH" value="80.0" type="string"/>
        <att name="NODE_CUSTOMGRAPHICS_POSITION_3" value="C,C,c,0.00,0.00" type="string"/>
        <att name="NODE_CUSTOMGRAPHICS_4" value="org.cytoscape.ding.customgraphics.NullCustomGraphics,0,[ Remove Graphics ]," type="string"/>
        <att name="NODE_LABEL_POSITION" value="C,C,c,0.00,0.00" type="string"/>
        <att name="NODE_LABEL_TRANSPARENCY" value="255" type="string"/>
        <att name="NODE_CUSTOMGRAPHICS_SIZE_4" value="0.0" type="string"/>
        <att name="NODE_CUSTOMGRAPHICS_2" value="org.cytoscape.ding.customgraphics.NullCustomGraphics,0,[ Remove Graphics ]," type="string"/>
        <att name="NODE_CUSTOMGRAPHICS_POSITION_4" value="C,C,c,0.00,0.00" type="string"/>
        <att name="NODE_LABEL_FONT_FACE" value="Dialog.plain,plain,18" type="string"/>
        <att name="NODE_CUSTOMGRAPHICS_SIZE_9" value="0.0" type="string"/>
        <att name="NODE_LABEL_COLOR" value="#000000" type="string"/>
        <att name="NODE_LABEL_FONT_SIZE" value="18" type="string"/>
        <att name="NODE_LABEL" value="MAVS" type="string"/>
      </att>
    </graphics>
  </node>
  <node id="2841" label="CKAP2" cy:nodeId="2041">
    <graphics y="-776.3721639757729" z="0.0" x="-1785.469970703125">
      <att name="lockedVisualProperties" type="list">
        <att name="NODE_NESTED_NETWORK_IMAGE_VISIBLE" value="true" type="string"/>
        <att name="NODE_CUSTOMGRAPHICS_SIZE_2" value="0.0" type="string"/>
        <att name="NODE_CUSTOMGRAPHICS_SIZE_6" value="0.0" type="string"/>
        <att name="NODE_BORDER_STROKE" value="SOLID" type="string"/>
        <att name="NODE_CUSTOMGRAPHICS_POSITION_7" value="C,C,c,0.00,0.00" type="string"/>
        <att name="NODE_CUSTOMGRAPHICS_8" value="org.cytoscape.ding.customgraphics.NullCustomGraphics,0,[ Remove Graphics ]," type="string"/>
        <att name="NODE_TRANSPARENCY" value="255" type="string"/>
        <att name="NODE_LABEL_WIDTH" value="200.0" type="string"/>
        <att name="NODE_CUSTOMGRAPHICS_SIZE_1" value="0.0" type="string"/>
        <att name="NODE_CUSTOMGRAPHICS_5" value="org.cytoscape.ding.customgraphics.NullCustomGraphics,0,[ Remove Graphics ]," type="string"/>
        <att name="NODE_CUSTOMGRAPHICS_9" value="org.cytoscape.ding.customgraphics.NullCustomGraphics,0,[ Remove Graphics ]," type="string"/>
        <att name="NODE_CUSTOMGRAPHICS_1" value="org.cytoscape.ding.customgraphics.NullCustomGraphics,0,[ Remove Graphics ]," type="string"/>
        <att name="NODE_CUSTOMGRAPHICS_POSITION_6" value="C,C,c,0.00,0.00" type="string"/>
        <att name="NODE_CUSTOMGRAPHICS_POSITION_2" value="C,C,c,0.00,0.00" type="string"/>
        <att name="NODE_SELECTED_PAINT" value="#FFFF00" type="string"/>
        <att name="NODE_HEIGHT" value="30.0" type="string"/>
        <att name="NODE_CUSTOMGRAPHICS_POSITION_8" value="C,C,c,0.00,0.00" type="string"/>
        <att name="NODE_CUSTOMGRAPHICS_POSITION_9" value="C,C,c,0.00,0.00" type="string"/>
        <att name="NODE_CUSTOMGRAPHICS_POSITION_1" value="C,C,c,0.00,0.00" type="string"/>
        <att name="NODE_BORDER_TRANSPARENCY" value="255" type="string"/>
        <att name="NODE_CUSTOMGRAPHICS_SIZE_3" value="0.0" type="string"/>
        <att name="NODE_CUSTOMGRAPHICS_3" value="org.cytoscape.ding.customgraphics.NullCustomGraphics,0,[ Remove Graphics ]," type="string"/>
        <att name="NODE_CUSTOMGRAPHICS_7" value="org.cytoscape.ding.customgraphics.NullCustomGraphics,0,[ Remove Graphics ]," type="string"/>
        <att name="NODE_CUSTOMGRAPHICS_SIZE_7" value="0.0" type="string"/>
        <att name="NODE_CUSTOMGRAPHICS_SIZE_8" value="0.0" type="string"/>
        <att name="NODE_CUSTOMGRAPHICS_POSITION_5" value="C,C,c,0.00,0.00" type="string"/>
        <att name="NODE_SHAPE" value="ROUND_RECTANGLE" type="string"/>
        <att name="NODE_SELECTED" value="false" type="string"/>
        <att name="NODE_DEPTH" value="0.0" type="string"/>
        <att name="NODE_CUSTOMGRAPHICS_SIZE_5" value="0.0" type="string"/>
        <att name="NODE_FILL_COLOR" value="#C8C8C8" type="string"/>
        <att name="NODE_VISIBLE" value="true" type="string"/>
        <att name="NODE_BORDER_WIDTH" value="0.0" type="string"/>
        <att name="NODE_TOOLTIP" value="" type="string"/>
        <att name="NODE_BORDER_PAINT" value="#006699" type="string"/>
        <att name="NODE_CUSTOMGRAPHICS_6" value="org.cytoscape.ding.customgraphics.NullCustomGraphics,0,[ Remove Graphics ]," type="string"/>
        <att name="NODE_WIDTH" value="80.0" type="string"/>
        <att name="NODE_CUSTOMGRAPHICS_POSITION_3" value="C,C,c,0.00,0.00" type="string"/>
        <att name="NODE_CUSTOMGRAPHICS_4" value="org.cytoscape.ding.customgraphics.NullCustomGraphics,0,[ Remove Graphics ]," type="string"/>
        <att name="NODE_LABEL_POSITION" value="C,C,c,0.00,0.00" type="string"/>
        <att name="NODE_LABEL_TRANSPARENCY" value="255" type="string"/>
        <att name="NODE_CUSTOMGRAPHICS_SIZE_4" value="0.0" type="string"/>
        <att name="NODE_CUSTOMGRAPHICS_2" value="org.cytoscape.ding.customgraphics.NullCustomGraphics,0,[ Remove Graphics ]," type="string"/>
        <att name="NODE_CUSTOMGRAPHICS_POSITION_4" value="C,C,c,0.00,0.00" type="string"/>
        <att name="NODE_LABEL_FONT_FACE" value="Dialog.plain,plain,18" type="string"/>
        <att name="NODE_CUSTOMGRAPHICS_SIZE_9" value="0.0" type="string"/>
        <att name="NODE_LABEL_COLOR" value="#000000" type="string"/>
        <att name="NODE_LABEL_FONT_SIZE" value="18" type="string"/>
        <att name="NODE_LABEL" value="CKAP2" type="string"/>
      </att>
    </graphics>
  </node>
  <node id="2840" label="ARG1" cy:nodeId="2042">
    <graphics y="-971.4869133414395" z="0.0" x="901.623240745379">
      <att name="lockedVisualProperties" type="list">
        <att name="NODE_NESTED_NETWORK_IMAGE_VISIBLE" value="true" type="string"/>
        <att name="NODE_CUSTOMGRAPHICS_SIZE_2" value="0.0" type="string"/>
        <att name="NODE_CUSTOMGRAPHICS_SIZE_6" value="0.0" type="string"/>
        <att name="NODE_BORDER_STROKE" value="SOLID" type="string"/>
        <att name="NODE_CUSTOMGRAPHICS_POSITION_7" value="C,C,c,0.00,0.00" type="string"/>
        <att name="NODE_CUSTOMGRAPHICS_8" value="org.cytoscape.ding.customgraphics.NullCustomGraphics,0,[ Remove Graphics ]," type="string"/>
        <att name="NODE_TRANSPARENCY" value="255" type="string"/>
        <att name="NODE_LABEL_WIDTH" value="200.0" type="string"/>
        <att name="NODE_CUSTOMGRAPHICS_SIZE_1" value="0.0" type="string"/>
        <att name="NODE_CUSTOMGRAPHICS_5" value="org.cytoscape.ding.customgraphics.NullCustomGraphics,0,[ Remove Graphics ]," type="string"/>
        <att name="NODE_CUSTOMGRAPHICS_9" value="org.cytoscape.ding.customgraphics.NullCustomGraphics,0,[ Remove Graphics ]," type="string"/>
        <att name="NODE_CUSTOMGRAPHICS_1" value="org.cytoscape.ding.customgraphics.NullCustomGraphics,0,[ Remove Graphics ]," type="string"/>
        <att name="NODE_CUSTOMGRAPHICS_POSITION_6" value="C,C,c,0.00,0.00" type="string"/>
        <att name="NODE_CUSTOMGRAPHICS_POSITION_2" value="C,C,c,0.00,0.00" type="string"/>
        <att name="NODE_SELECTED_PAINT" value="#FFFF00" type="string"/>
        <att name="NODE_HEIGHT" value="30.0" type="string"/>
        <att name="NODE_CUSTOMGRAPHICS_POSITION_8" value="C,C,c,0.00,0.00" type="string"/>
        <att name="NODE_CUSTOMGRAPHICS_POSITION_9" value="C,C,c,0.00,0.00" type="string"/>
        <att name="NODE_CUSTOMGRAPHICS_POSITION_1" value="C,C,c,0.00,0.00" type="string"/>
        <att name="NODE_BORDER_TRANSPARENCY" value="255" type="string"/>
        <att name="NODE_CUSTOMGRAPHICS_SIZE_3" value="0.0" type="string"/>
        <att name="NODE_CUSTOMGRAPHICS_3" value="org.cytoscape.ding.customgraphics.NullCustomGraphics,0,[ Remove Graphics ]," type="string"/>
        <att name="NODE_CUSTOMGRAPHICS_7" value="org.cytoscape.ding.customgraphics.NullCustomGraphics,0,[ Remove Graphics ]," type="string"/>
        <att name="NODE_CUSTOMGRAPHICS_SIZE_7" value="0.0" type="string"/>
        <att name="NODE_CUSTOMGRAPHICS_SIZE_8" value="0.0" type="string"/>
        <att name="NODE_CUSTOMGRAPHICS_POSITION_5" value="C,C,c,0.00,0.00" type="string"/>
        <att name="NODE_SHAPE" value="ROUND_RECTANGLE" type="string"/>
        <att name="NODE_SELECTED" value="false" type="string"/>
        <att name="NODE_DEPTH" value="0.0" type="string"/>
        <att name="NODE_CUSTOMGRAPHICS_SIZE_5" value="0.0" type="string"/>
        <att name="NODE_FILL_COLOR" value="#C8C8C8" type="string"/>
        <att name="NODE_VISIBLE" value="true" type="string"/>
        <att name="NODE_BORDER_WIDTH" value="0.0" type="string"/>
        <att name="NODE_TOOLTIP" value="" type="string"/>
        <att name="NODE_BORDER_PAINT" value="#006699" type="string"/>
        <att name="NODE_CUSTOMGRAPHICS_6" value="org.cytoscape.ding.customgraphics.NullCustomGraphics,0,[ Remove Graphics ]," type="string"/>
        <att name="NODE_WIDTH" value="80.0" type="string"/>
        <att name="NODE_CUSTOMGRAPHICS_POSITION_3" value="C,C,c,0.00,0.00" type="string"/>
        <att name="NODE_CUSTOMGRAPHICS_4" value="org.cytoscape.ding.customgraphics.NullCustomGraphics,0,[ Remove Graphics ]," type="string"/>
        <att name="NODE_LABEL_POSITION" value="C,C,c,0.00,0.00" type="string"/>
        <att name="NODE_LABEL_TRANSPARENCY" value="255" type="string"/>
        <att name="NODE_CUSTOMGRAPHICS_SIZE_4" value="0.0" type="string"/>
        <att name="NODE_CUSTOMGRAPHICS_2" value="org.cytoscape.ding.customgraphics.NullCustomGraphics,0,[ Remove Graphics ]," type="string"/>
        <att name="NODE_CUSTOMGRAPHICS_POSITION_4" value="C,C,c,0.00,0.00" type="string"/>
        <att name="NODE_LABEL_FONT_FACE" value="Dialog.plain,plain,18" type="string"/>
        <att name="NODE_CUSTOMGRAPHICS_SIZE_9" value="0.0" type="string"/>
        <att name="NODE_LABEL_COLOR" value="#000000" type="string"/>
        <att name="NODE_LABEL_FONT_SIZE" value="18" type="string"/>
        <att name="NODE_LABEL" value="ARG1" type="string"/>
      </att>
    </graphics>
  </node>
  <node id="2839" label="CEP131" cy:nodeId="2043">
    <graphics y="-672.1475546007729" z="0.0" x="-1881.358154296875">
      <att name="lockedVisualProperties" type="list">
        <att name="NODE_NESTED_NETWORK_IMAGE_VISIBLE" value="true" type="string"/>
        <att name="NODE_CUSTOMGRAPHICS_SIZE_2" value="0.0" type="string"/>
        <att name="NODE_CUSTOMGRAPHICS_SIZE_6" value="0.0" type="string"/>
        <att name="NODE_BORDER_STROKE" value="SOLID" type="string"/>
        <att name="NODE_CUSTOMGRAPHICS_POSITION_7" value="C,C,c,0.00,0.00" type="string"/>
        <att name="NODE_CUSTOMGRAPHICS_8" value="org.cytoscape.ding.customgraphics.NullCustomGraphics,0,[ Remove Graphics ]," type="string"/>
        <att name="NODE_TRANSPARENCY" value="255" type="string"/>
        <att name="NODE_LABEL_WIDTH" value="200.0" type="string"/>
        <att name="NODE_CUSTOMGRAPHICS_SIZE_1" value="0.0" type="string"/>
        <att name="NODE_CUSTOMGRAPHICS_5" value="org.cytoscape.ding.customgraphics.NullCustomGraphics,0,[ Remove Graphics ]," type="string"/>
        <att name="NODE_CUSTOMGRAPHICS_9" value="org.cytoscape.ding.customgraphics.NullCustomGraphics,0,[ Remove Graphics ]," type="string"/>
        <att name="NODE_CUSTOMGRAPHICS_1" value="org.cytoscape.ding.customgraphics.NullCustomGraphics,0,[ Remove Graphics ]," type="string"/>
        <att name="NODE_CUSTOMGRAPHICS_POSITION_6" value="C,C,c,0.00,0.00" type="string"/>
        <att name="NODE_CUSTOMGRAPHICS_POSITION_2" value="C,C,c,0.00,0.00" type="string"/>
        <att name="NODE_SELECTED_PAINT" value="#FFFF00" type="string"/>
        <att name="NODE_HEIGHT" value="30.0" type="string"/>
        <att name="NODE_CUSTOMGRAPHICS_POSITION_8" value="C,C,c,0.00,0.00" type="string"/>
        <att name="NODE_CUSTOMGRAPHICS_POSITION_9" value="C,C,c,0.00,0.00" type="string"/>
        <att name="NODE_CUSTOMGRAPHICS_POSITION_1" value="C,C,c,0.00,0.00" type="string"/>
        <att name="NODE_BORDER_TRANSPARENCY" value="255" type="string"/>
        <att name="NODE_CUSTOMGRAPHICS_SIZE_3" value="0.0" type="string"/>
        <att name="NODE_CUSTOMGRAPHICS_3" value="org.cytoscape.ding.customgraphics.NullCustomGraphics,0,[ Remove Graphics ]," type="string"/>
        <att name="NODE_CUSTOMGRAPHICS_7" value="org.cytoscape.ding.customgraphics.NullCustomGraphics,0,[ Remove Graphics ]," type="string"/>
        <att name="NODE_CUSTOMGRAPHICS_SIZE_7" value="0.0" type="string"/>
        <att name="NODE_CUSTOMGRAPHICS_SIZE_8" value="0.0" type="string"/>
        <att name="NODE_CUSTOMGRAPHICS_POSITION_5" value="C,C,c,0.00,0.00" type="string"/>
        <att name="NODE_SHAPE" value="ROUND_RECTANGLE" type="string"/>
        <att name="NODE_SELECTED" value="false" type="string"/>
        <att name="NODE_DEPTH" value="0.0" type="string"/>
        <att name="NODE_CUSTOMGRAPHICS_SIZE_5" value="0.0" type="string"/>
        <att name="NODE_FILL_COLOR" value="#C8C8C8" type="string"/>
        <att name="NODE_VISIBLE" value="true" type="string"/>
        <att name="NODE_BORDER_WIDTH" value="0.0" type="string"/>
        <att name="NODE_TOOLTIP" value="" type="string"/>
        <att name="NODE_BORDER_PAINT" value="#006699" type="string"/>
        <att name="NODE_CUSTOMGRAPHICS_6" value="org.cytoscape.ding.customgraphics.NullCustomGraphics,0,[ Remove Graphics ]," type="string"/>
        <att name="NODE_WIDTH" value="80.0" type="string"/>
        <att name="NODE_CUSTOMGRAPHICS_POSITION_3" value="C,C,c,0.00,0.00" type="string"/>
        <att name="NODE_CUSTOMGRAPHICS_4" value="org.cytoscape.ding.customgraphics.NullCustomGraphics,0,[ Remove Graphics ]," type="string"/>
        <att name="NODE_LABEL_POSITION" value="C,C,c,0.00,0.00" type="string"/>
        <att name="NODE_LABEL_TRANSPARENCY" value="255" type="string"/>
        <att name="NODE_CUSTOMGRAPHICS_SIZE_4" value="0.0" type="string"/>
        <att name="NODE_CUSTOMGRAPHICS_2" value="org.cytoscape.ding.customgraphics.NullCustomGraphics,0,[ Remove Graphics ]," type="string"/>
        <att name="NODE_CUSTOMGRAPHICS_POSITION_4" value="C,C,c,0.00,0.00" type="string"/>
        <att name="NODE_LABEL_FONT_FACE" value="Dialog.plain,plain,18" type="string"/>
        <att name="NODE_CUSTOMGRAPHICS_SIZE_9" value="0.0" type="string"/>
        <att name="NODE_LABEL_COLOR" value="#000000" type="string"/>
        <att name="NODE_LABEL_FONT_SIZE" value="18" type="string"/>
        <att name="NODE_LABEL" value="CEP131" type="string"/>
      </att>
    </graphics>
  </node>
  <node id="2838" label="ZFAND6" cy:nodeId="2044">
    <graphics y="-859.1953232649101" z="0.0" x="1100.3142951546542">
      <att name="lockedVisualProperties" type="list">
        <att name="NODE_NESTED_NETWORK_IMAGE_VISIBLE" value="true" type="string"/>
        <att name="NODE_CUSTOMGRAPHICS_SIZE_2" value="0.0" type="string"/>
        <att name="NODE_CUSTOMGRAPHICS_SIZE_6" value="0.0" type="string"/>
        <att name="NODE_BORDER_STROKE" value="SOLID" type="string"/>
        <att name="NODE_CUSTOMGRAPHICS_POSITION_7" value="C,C,c,0.00,0.00" type="string"/>
        <att name="NODE_CUSTOMGRAPHICS_8" value="org.cytoscape.ding.customgraphics.NullCustomGraphics,0,[ Remove Graphics ]," type="string"/>
        <att name="NODE_TRANSPARENCY" value="255" type="string"/>
        <att name="NODE_LABEL_WIDTH" value="200.0" type="string"/>
        <att name="NODE_CUSTOMGRAPHICS_SIZE_1" value="0.0" type="string"/>
        <att name="NODE_CUSTOMGRAPHICS_5" value="org.cytoscape.ding.customgraphics.NullCustomGraphics,0,[ Remove Graphics ]," type="string"/>
        <att name="NODE_CUSTOMGRAPHICS_9" value="org.cytoscape.ding.customgraphics.NullCustomGraphics,0,[ Remove Graphics ]," type="string"/>
        <att name="NODE_CUSTOMGRAPHICS_1" value="org.cytoscape.ding.customgraphics.NullCustomGraphics,0,[ Remove Graphics ]," type="string"/>
        <att name="NODE_CUSTOMGRAPHICS_POSITION_6" value="C,C,c,0.00,0.00" type="string"/>
        <att name="NODE_CUSTOMGRAPHICS_POSITION_2" value="C,C,c,0.00,0.00" type="string"/>
        <att name="NODE_SELECTED_PAINT" value="#FFFF00" type="string"/>
        <att name="NODE_HEIGHT" value="30.0" type="string"/>
        <att name="NODE_CUSTOMGRAPHICS_POSITION_8" value="C,C,c,0.00,0.00" type="string"/>
        <att name="NODE_CUSTOMGRAPHICS_POSITION_9" value="C,C,c,0.00,0.00" type="string"/>
        <att name="NODE_CUSTOMGRAPHICS_POSITION_1" value="C,C,c,0.00,0.00" type="string"/>
        <att name="NODE_BORDER_TRANSPARENCY" value="255" type="string"/>
        <att name="NODE_CUSTOMGRAPHICS_SIZE_3" value="0.0" type="string"/>
        <att name="NODE_CUSTOMGRAPHICS_3" value="org.cytoscape.ding.customgraphics.NullCustomGraphics,0,[ Remove Graphics ]," type="string"/>
        <att name="NODE_CUSTOMGRAPHICS_7" value="org.cytoscape.ding.customgraphics.NullCustomGraphics,0,[ Remove Graphics ]," type="string"/>
        <att name="NODE_CUSTOMGRAPHICS_SIZE_7" value="0.0" type="string"/>
        <att name="NODE_CUSTOMGRAPHICS_SIZE_8" value="0.0" type="string"/>
        <att name="NODE_CUSTOMGRAPHICS_POSITION_5" value="C,C,c,0.00,0.00" type="string"/>
        <att name="NODE_SHAPE" value="ROUND_RECTANGLE" type="string"/>
        <att name="NODE_SELECTED" value="false" type="string"/>
        <att name="NODE_DEPTH" value="0.0" type="string"/>
        <att name="NODE_CUSTOMGRAPHICS_SIZE_5" value="0.0" type="string"/>
        <att name="NODE_FILL_COLOR" value="#C8C8C8" type="string"/>
        <att name="NODE_VISIBLE" value="true" type="string"/>
        <att name="NODE_BORDER_WIDTH" value="0.0" type="string"/>
        <att name="NODE_TOOLTIP" value="" type="string"/>
        <att name="NODE_BORDER_PAINT" value="#006699" type="string"/>
        <att name="NODE_CUSTOMGRAPHICS_6" value="org.cytoscape.ding.customgraphics.NullCustomGraphics,0,[ Remove Graphics ]," type="string"/>
        <att name="NODE_WIDTH" value="80.0" type="string"/>
        <att name="NODE_CUSTOMGRAPHICS_POSITION_3" value="C,C,c,0.00,0.00" type="string"/>
        <att name="NODE_CUSTOMGRAPHICS_4" value="org.cytoscape.ding.customgraphics.NullCustomGraphics,0,[ Remove Graphics ]," type="string"/>
        <att name="NODE_LABEL_POSITION" value="C,C,c,0.00,0.00" type="string"/>
        <att name="NODE_LABEL_TRANSPARENCY" value="255" type="string"/>
        <att name="NODE_CUSTOMGRAPHICS_SIZE_4" value="0.0" type="string"/>
        <att name="NODE_CUSTOMGRAPHICS_2" value="org.cytoscape.ding.customgraphics.NullCustomGraphics,0,[ Remove Graphics ]," type="string"/>
        <att name="NODE_CUSTOMGRAPHICS_POSITION_4" value="C,C,c,0.00,0.00" type="string"/>
        <att name="NODE_LABEL_FONT_FACE" value="Dialog.plain,plain,18" type="string"/>
        <att name="NODE_CUSTOMGRAPHICS_SIZE_9" value="0.0" type="string"/>
        <att name="NODE_LABEL_COLOR" value="#000000" type="string"/>
        <att name="NODE_LABEL_FONT_SIZE" value="18" type="string"/>
        <att name="NODE_LABEL" value="ZFAND6" type="string"/>
      </att>
    </graphics>
  </node>
  <node id="2837" label="ACTG1" cy:nodeId="2045">
    <graphics y="-193.15718042106533" z="0.0" x="60.86656933650923">
      <att name="lockedVisualProperties" type="list">
        <att name="NODE_NESTED_NETWORK_IMAGE_VISIBLE" value="true" type="string"/>
        <att name="NODE_CUSTOMGRAPHICS_SIZE_2" value="0.0" type="string"/>
        <att name="NODE_CUSTOMGRAPHICS_SIZE_6" value="0.0" type="string"/>
        <att name="NODE_BORDER_STROKE" value="SOLID" type="string"/>
        <att name="NODE_CUSTOMGRAPHICS_POSITION_7" value="C,C,c,0.00,0.00" type="string"/>
        <att name="NODE_CUSTOMGRAPHICS_8" value="org.cytoscape.ding.customgraphics.NullCustomGraphics,0,[ Remove Graphics ]," type="string"/>
        <att name="NODE_TRANSPARENCY" value="255" type="string"/>
        <att name="NODE_LABEL_WIDTH" value="200.0" type="string"/>
        <att name="NODE_CUSTOMGRAPHICS_SIZE_1" value="0.0" type="string"/>
        <att name="NODE_CUSTOMGRAPHICS_5" value="org.cytoscape.ding.customgraphics.NullCustomGraphics,0,[ Remove Graphics ]," type="string"/>
        <att name="NODE_CUSTOMGRAPHICS_9" value="org.cytoscape.ding.customgraphics.NullCustomGraphics,0,[ Remove Graphics ]," type="string"/>
        <att name="NODE_CUSTOMGRAPHICS_1" value="org.cytoscape.ding.customgraphics.NullCustomGraphics,0,[ Remove Graphics ]," type="string"/>
        <att name="NODE_CUSTOMGRAPHICS_POSITION_6" value="C,C,c,0.00,0.00" type="string"/>
        <att name="NODE_CUSTOMGRAPHICS_POSITION_2" value="C,C,c,0.00,0.00" type="string"/>
        <att name="NODE_SELECTED_PAINT" value="#FFFF00" type="string"/>
        <att name="NODE_HEIGHT" value="30.0" type="string"/>
        <att name="NODE_CUSTOMGRAPHICS_POSITION_8" value="C,C,c,0.00,0.00" type="string"/>
        <att name="NODE_CUSTOMGRAPHICS_POSITION_9" value="C,C,c,0.00,0.00" type="string"/>
        <att name="NODE_CUSTOMGRAPHICS_POSITION_1" value="C,C,c,0.00,0.00" type="string"/>
        <att name="NODE_BORDER_TRANSPARENCY" value="255" type="string"/>
        <att name="NODE_CUSTOMGRAPHICS_SIZE_3" value="0.0" type="string"/>
        <att name="NODE_CUSTOMGRAPHICS_3" value="org.cytoscape.ding.customgraphics.NullCustomGraphics,0,[ Remove Graphics ]," type="string"/>
        <att name="NODE_CUSTOMGRAPHICS_7" value="org.cytoscape.ding.customgraphics.NullCustomGraphics,0,[ Remove Graphics ]," type="string"/>
        <att name="NODE_CUSTOMGRAPHICS_SIZE_7" value="0.0" type="string"/>
        <att name="NODE_CUSTOMGRAPHICS_SIZE_8" value="0.0" type="string"/>
        <att name="NODE_CUSTOMGRAPHICS_POSITION_5" value="C,C,c,0.00,0.00" type="string"/>
        <att name="NODE_SHAPE" value="ROUND_RECTANGLE" type="string"/>
        <att name="NODE_SELECTED" value="false" type="string"/>
        <att name="NODE_DEPTH" value="0.0" type="string"/>
        <att name="NODE_CUSTOMGRAPHICS_SIZE_5" value="0.0" type="string"/>
        <att name="NODE_FILL_COLOR" value="#C8C8C8" type="string"/>
        <att name="NODE_VISIBLE" value="true" type="string"/>
        <att name="NODE_BORDER_WIDTH" value="0.0" type="string"/>
        <att name="NODE_TOOLTIP" value="" type="string"/>
        <att name="NODE_BORDER_PAINT" value="#006699" type="string"/>
        <att name="NODE_CUSTOMGRAPHICS_6" value="org.cytoscape.ding.customgraphics.NullCustomGraphics,0,[ Remove Graphics ]," type="string"/>
        <att name="NODE_WIDTH" value="80.0" type="string"/>
        <att name="NODE_CUSTOMGRAPHICS_POSITION_3" value="C,C,c,0.00,0.00" type="string"/>
        <att name="NODE_CUSTOMGRAPHICS_4" value="org.cytoscape.ding.customgraphics.NullCustomGraphics,0,[ Remove Graphics ]," type="string"/>
        <att name="NODE_LABEL_POSITION" value="C,C,c,0.00,0.00" type="string"/>
        <att name="NODE_LABEL_TRANSPARENCY" value="255" type="string"/>
        <att name="NODE_CUSTOMGRAPHICS_SIZE_4" value="0.0" type="string"/>
        <att name="NODE_CUSTOMGRAPHICS_2" value="org.cytoscape.ding.customgraphics.NullCustomGraphics,0,[ Remove Graphics ]," type="string"/>
        <att name="NODE_CUSTOMGRAPHICS_POSITION_4" value="C,C,c,0.00,0.00" type="string"/>
        <att name="NODE_LABEL_FONT_FACE" value="Dialog.plain,plain,18" type="string"/>
        <att name="NODE_CUSTOMGRAPHICS_SIZE_9" value="0.0" type="string"/>
        <att name="NODE_LABEL_COLOR" value="#000000" type="string"/>
        <att name="NODE_LABEL_FONT_SIZE" value="18" type="string"/>
        <att name="NODE_LABEL" value="ACTG1" type="string"/>
      </att>
    </graphics>
  </node>
  <node id="2836" label="SCPEP1" cy:nodeId="2046">
    <graphics y="-742.3446371203041" z="0.0" x="-1038.1031494140625">
      <att name="lockedVisualProperties" type="list">
        <att name="NODE_NESTED_NETWORK_IMAGE_VISIBLE" value="true" type="string"/>
        <att name="NODE_CUSTOMGRAPHICS_SIZE_2" value="0.0" type="string"/>
        <att name="NODE_CUSTOMGRAPHICS_SIZE_6" value="0.0" type="string"/>
        <att name="NODE_BORDER_STROKE" value="SOLID" type="string"/>
        <att name="NODE_CUSTOMGRAPHICS_POSITION_7" value="C,C,c,0.00,0.00" type="string"/>
        <att name="NODE_CUSTOMGRAPHICS_8" value="org.cytoscape.ding.customgraphics.NullCustomGraphics,0,[ Remove Graphics ]," type="string"/>
        <att name="NODE_TRANSPARENCY" value="255" type="string"/>
        <att name="NODE_LABEL_WIDTH" value="200.0" type="string"/>
        <att name="NODE_CUSTOMGRAPHICS_SIZE_1" value="0.0" type="string"/>
        <att name="NODE_CUSTOMGRAPHICS_5" value="org.cytoscape.ding.customgraphics.NullCustomGraphics,0,[ Remove Graphics ]," type="string"/>
        <att name="NODE_CUSTOMGRAPHICS_9" value="org.cytoscape.ding.customgraphics.NullCustomGraphics,0,[ Remove Graphics ]," type="string"/>
        <att name="NODE_CUSTOMGRAPHICS_1" value="org.cytoscape.ding.customgraphics.NullCustomGraphics,0,[ Remove Graphics ]," type="string"/>
        <att name="NODE_CUSTOMGRAPHICS_POSITION_6" value="C,C,c,0.00,0.00" type="string"/>
        <att name="NODE_CUSTOMGRAPHICS_POSITION_2" value="C,C,c,0.00,0.00" type="string"/>
        <att name="NODE_SELECTED_PAINT" value="#FFFF00" type="string"/>
        <att name="NODE_HEIGHT" value="30.0" type="string"/>
        <att name="NODE_CUSTOMGRAPHICS_POSITION_8" value="C,C,c,0.00,0.00" type="string"/>
        <att name="NODE_CUSTOMGRAPHICS_POSITION_9" value="C,C,c,0.00,0.00" type="string"/>
        <att name="NODE_CUSTOMGRAPHICS_POSITION_1" value="C,C,c,0.00,0.00" type="string"/>
        <att name="NODE_BORDER_TRANSPARENCY" value="255" type="string"/>
        <att name="NODE_CUSTOMGRAPHICS_SIZE_3" value="0.0" type="string"/>
        <att name="NODE_CUSTOMGRAPHICS_3" value="org.cytoscape.ding.customgraphics.NullCustomGraphics,0,[ Remove Graphics ]," type="string"/>
        <att name="NODE_CUSTOMGRAPHICS_7" value="org.cytoscape.ding.customgraphics.NullCustomGraphics,0,[ Remove Graphics ]," type="string"/>
        <att name="NODE_CUSTOMGRAPHICS_SIZE_7" value="0.0" type="string"/>
        <att name="NODE_CUSTOMGRAPHICS_SIZE_8" value="0.0" type="string"/>
        <att name="NODE_CUSTOMGRAPHICS_POSITION_5" value="C,C,c,0.00,0.00" type="string"/>
        <att name="NODE_SHAPE" value="ROUND_RECTANGLE" type="string"/>
        <att name="NODE_SELECTED" value="false" type="string"/>
        <att name="NODE_DEPTH" value="0.0" type="string"/>
        <att name="NODE_CUSTOMGRAPHICS_SIZE_5" value="0.0" type="string"/>
        <att name="NODE_FILL_COLOR" value="#C8C8C8" type="string"/>
        <att name="NODE_VISIBLE" value="true" type="string"/>
        <att name="NODE_BORDER_WIDTH" value="0.0" type="string"/>
        <att name="NODE_TOOLTIP" value="" type="string"/>
        <att name="NODE_BORDER_PAINT" value="#006699" type="string"/>
        <att name="NODE_CUSTOMGRAPHICS_6" value="org.cytoscape.ding.customgraphics.NullCustomGraphics,0,[ Remove Graphics ]," type="string"/>
        <att name="NODE_WIDTH" value="80.0" type="string"/>
        <att name="NODE_CUSTOMGRAPHICS_POSITION_3" value="C,C,c,0.00,0.00" type="string"/>
        <att name="NODE_CUSTOMGRAPHICS_4" value="org.cytoscape.ding.customgraphics.NullCustomGraphics,0,[ Remove Graphics ]," type="string"/>
        <att name="NODE_LABEL_POSITION" value="C,C,c,0.00,0.00" type="string"/>
        <att name="NODE_LABEL_TRANSPARENCY" value="255" type="string"/>
        <att name="NODE_CUSTOMGRAPHICS_SIZE_4" value="0.0" type="string"/>
        <att name="NODE_CUSTOMGRAPHICS_2" value="org.cytoscape.ding.customgraphics.NullCustomGraphics,0,[ Remove Graphics ]," type="string"/>
        <att name="NODE_CUSTOMGRAPHICS_POSITION_4" value="C,C,c,0.00,0.00" type="string"/>
        <att name="NODE_LABEL_FONT_FACE" value="Dialog.plain,plain,18" type="string"/>
        <att name="NODE_CUSTOMGRAPHICS_SIZE_9" value="0.0" type="string"/>
        <att name="NODE_LABEL_COLOR" value="#000000" type="string"/>
        <att name="NODE_LABEL_FONT_SIZE" value="18" type="string"/>
        <att name="NODE_LABEL" value="SCPEP1" type="string"/>
      </att>
    </graphics>
  </node>
  <node id="2835" label="IDE" cy:nodeId="2047">
    <graphics y="-1137.2624766210615" z="0.0" x="-721.7447018033962">
      <att name="lockedVisualProperties" type="list">
        <att name="NODE_NESTED_NETWORK_IMAGE_VISIBLE" value="true" type="string"/>
        <att name="NODE_CUSTOMGRAPHICS_SIZE_2" value="0.0" type="string"/>
        <att name="NODE_CUSTOMGRAPHICS_SIZE_6" value="0.0" type="string"/>
        <att name="NODE_BORDER_STROKE" value="SOLID" type="string"/>
        <att name="NODE_CUSTOMGRAPHICS_POSITION_7" value="C,C,c,0.00,0.00" type="string"/>
        <att name="NODE_CUSTOMGRAPHICS_8" value="org.cytoscape.ding.customgraphics.NullCustomGraphics,0,[ Remove Graphics ]," type="string"/>
        <att name="NODE_TRANSPARENCY" value="255" type="string"/>
        <att name="NODE_LABEL_WIDTH" value="200.0" type="string"/>
        <att name="NODE_CUSTOMGRAPHICS_SIZE_1" value="0.0" type="string"/>
        <att name="NODE_CUSTOMGRAPHICS_5" value="org.cytoscape.ding.customgraphics.NullCustomGraphics,0,[ Remove Graphics ]," type="string"/>
        <att name="NODE_CUSTOMGRAPHICS_9" value="org.cytoscape.ding.customgraphics.NullCustomGraphics,0,[ Remove Graphics ]," type="string"/>
        <att name="NODE_CUSTOMGRAPHICS_1" value="org.cytoscape.ding.customgraphics.NullCustomGraphics,0,[ Remove Graphics ]," type="string"/>
        <att name="NODE_CUSTOMGRAPHICS_POSITION_6" value="C,C,c,0.00,0.00" type="string"/>
        <att name="NODE_CUSTOMGRAPHICS_POSITION_2" value="C,C,c,0.00,0.00" type="string"/>
        <att name="NODE_SELECTED_PAINT" value="#FFFF00" type="string"/>
        <att name="NODE_HEIGHT" value="30.0" type="string"/>
        <att name="NODE_CUSTOMGRAPHICS_POSITION_8" value="C,C,c,0.00,0.00" type="string"/>
        <att name="NODE_CUSTOMGRAPHICS_POSITION_9" value="C,C,c,0.00,0.00" type="string"/>
        <att name="NODE_CUSTOMGRAPHICS_POSITION_1" value="C,C,c,0.00,0.00" type="string"/>
        <att name="NODE_BORDER_TRANSPARENCY" value="255" type="string"/>
        <att name="NODE_CUSTOMGRAPHICS_SIZE_3" value="0.0" type="string"/>
        <att name="NODE_CUSTOMGRAPHICS_3" value="org.cytoscape.ding.customgraphics.NullCustomGraphics,0,[ Remove Graphics ]," type="string"/>
        <att name="NODE_CUSTOMGRAPHICS_7" value="org.cytoscape.ding.customgraphics.NullCustomGraphics,0,[ Remove Graphics ]," type="string"/>
        <att name="NODE_CUSTOMGRAPHICS_SIZE_7" value="0.0" type="string"/>
        <att name="NODE_CUSTOMGRAPHICS_SIZE_8" value="0.0" type="string"/>
        <att name="NODE_CUSTOMGRAPHICS_POSITION_5" value="C,C,c,0.00,0.00" type="string"/>
        <att name="NODE_SHAPE" value="ROUND_RECTANGLE" type="string"/>
        <att name="NODE_SELECTED" value="false" type="string"/>
        <att name="NODE_DEPTH" value="0.0" type="string"/>
        <att name="NODE_CUSTOMGRAPHICS_SIZE_5" value="0.0" type="string"/>
        <att name="NODE_FILL_COLOR" value="#C8C8C8" type="string"/>
        <att name="NODE_VISIBLE" value="true" type="string"/>
        <att name="NODE_BORDER_WIDTH" value="0.0" type="string"/>
        <att name="NODE_TOOLTIP" value="" type="string"/>
        <att name="NODE_BORDER_PAINT" value="#006699" type="string"/>
        <att name="NODE_CUSTOMGRAPHICS_6" value="org.cytoscape.ding.customgraphics.NullCustomGraphics,0,[ Remove Graphics ]," type="string"/>
        <att name="NODE_WIDTH" value="80.0" type="string"/>
        <att name="NODE_CUSTOMGRAPHICS_POSITION_3" value="C,C,c,0.00,0.00" type="string"/>
        <att name="NODE_CUSTOMGRAPHICS_4" value="org.cytoscape.ding.customgraphics.NullCustomGraphics,0,[ Remove Graphics ]," type="string"/>
        <att name="NODE_LABEL_POSITION" value="C,C,c,0.00,0.00" type="string"/>
        <att name="NODE_LABEL_TRANSPARENCY" value="255" type="string"/>
        <att name="NODE_CUSTOMGRAPHICS_SIZE_4" value="0.0" type="string"/>
        <att name="NODE_CUSTOMGRAPHICS_2" value="org.cytoscape.ding.customgraphics.NullCustomGraphics,0,[ Remove Graphics ]," type="string"/>
        <att name="NODE_CUSTOMGRAPHICS_POSITION_4" value="C,C,c,0.00,0.00" type="string"/>
        <att name="NODE_LABEL_FONT_FACE" value="Dialog.plain,plain,18" type="string"/>
        <att name="NODE_CUSTOMGRAPHICS_SIZE_9" value="0.0" type="string"/>
        <att name="NODE_LABEL_COLOR" value="#000000" type="string"/>
        <att name="NODE_LABEL_FONT_SIZE" value="18" type="string"/>
        <att name="NODE_LABEL" value="IDE" type="string"/>
      </att>
    </graphics>
  </node>
  <node id="2834" label="PPT1" cy:nodeId="2048">
    <graphics y="-733.5366537218666" z="0.0" x="-1130.532958984375">
      <att name="lockedVisualProperties" type="list">
        <att name="NODE_NESTED_NETWORK_IMAGE_VISIBLE" value="true" type="string"/>
        <att name="NODE_CUSTOMGRAPHICS_SIZE_2" value="0.0" type="string"/>
        <att name="NODE_CUSTOMGRAPHICS_SIZE_6" value="0.0" type="string"/>
        <att name="NODE_BORDER_STROKE" value="SOLID" type="string"/>
        <att name="NODE_CUSTOMGRAPHICS_POSITION_7" value="C,C,c,0.00,0.00" type="string"/>
        <att name="NODE_CUSTOMGRAPHICS_8" value="org.cytoscape.ding.customgraphics.NullCustomGraphics,0,[ Remove Graphics ]," type="string"/>
        <att name="NODE_TRANSPARENCY" value="255" type="string"/>
        <att name="NODE_LABEL_WIDTH" value="200.0" type="string"/>
        <att name="NODE_CUSTOMGRAPHICS_SIZE_1" value="0.0" type="string"/>
        <att name="NODE_CUSTOMGRAPHICS_5" value="org.cytoscape.ding.customgraphics.NullCustomGraphics,0,[ Remove Graphics ]," type="string"/>
        <att name="NODE_CUSTOMGRAPHICS_9" value="org.cytoscape.ding.customgraphics.NullCustomGraphics,0,[ Remove Graphics ]," type="string"/>
        <att name="NODE_CUSTOMGRAPHICS_1" value="org.cytoscape.ding.customgraphics.NullCustomGraphics,0,[ Remove Graphics ]," type="string"/>
        <att name="NODE_CUSTOMGRAPHICS_POSITION_6" value="C,C,c,0.00,0.00" type="string"/>
        <att name="NODE_CUSTOMGRAPHICS_POSITION_2" value="C,C,c,0.00,0.00" type="string"/>
        <att name="NODE_SELECTED_PAINT" value="#FFFF00" type="string"/>
        <att name="NODE_HEIGHT" value="30.0" type="string"/>
        <att name="NODE_CUSTOMGRAPHICS_POSITION_8" value="C,C,c,0.00,0.00" type="string"/>
        <att name="NODE_CUSTOMGRAPHICS_POSITION_9" value="C,C,c,0.00,0.00" type="string"/>
        <att name="NODE_CUSTOMGRAPHICS_POSITION_1" value="C,C,c,0.00,0.00" type="string"/>
        <att name="NODE_BORDER_TRANSPARENCY" value="255" type="string"/>
        <att name="NODE_CUSTOMGRAPHICS_SIZE_3" value="0.0" type="string"/>
        <att name="NODE_CUSTOMGRAPHICS_3" value="org.cytoscape.ding.customgraphics.NullCustomGraphics,0,[ Remove Graphics ]," type="string"/>
        <att name="NODE_CUSTOMGRAPHICS_7" value="org.cytoscape.ding.customgraphics.NullCustomGraphics,0,[ Remove Graphics ]," type="string"/>
        <att name="NODE_CUSTOMGRAPHICS_SIZE_7" value="0.0" type="string"/>
        <att name="NODE_CUSTOMGRAPHICS_SIZE_8" value="0.0" type="string"/>
        <att name="NODE_CUSTOMGRAPHICS_POSITION_5" value="C,C,c,0.00,0.00" type="string"/>
        <att name="NODE_SHAPE" value="ROUND_RECTANGLE" type="string"/>
        <att name="NODE_SELECTED" value="false" type="string"/>
        <att name="NODE_DEPTH" value="0.0" type="string"/>
        <att name="NODE_CUSTOMGRAPHICS_SIZE_5" value="0.0" type="string"/>
        <att name="NODE_FILL_COLOR" value="#C8C8C8" type="string"/>
        <att name="NODE_VISIBLE" value="true" type="string"/>
        <att name="NODE_BORDER_WIDTH" value="0.0" type="string"/>
        <att name="NODE_TOOLTIP" value="" type="string"/>
        <att name="NODE_BORDER_PAINT" value="#006699" type="string"/>
        <att name="NODE_CUSTOMGRAPHICS_6" value="org.cytoscape.ding.customgraphics.NullCustomGraphics,0,[ Remove Graphics ]," type="string"/>
        <att name="NODE_WIDTH" value="80.0" type="string"/>
        <att name="NODE_CUSTOMGRAPHICS_POSITION_3" value="C,C,c,0.00,0.00" type="string"/>
        <att name="NODE_CUSTOMGRAPHICS_4" value="org.cytoscape.ding.customgraphics.NullCustomGraphics,0,[ Remove Graphics ]," type="string"/>
        <att name="NODE_LABEL_POSITION" value="C,C,c,0.00,0.00" type="string"/>
        <att name="NODE_LABEL_TRANSPARENCY" value="255" type="string"/>
        <att name="NODE_CUSTOMGRAPHICS_SIZE_4" value="0.0" type="string"/>
        <att name="NODE_CUSTOMGRAPHICS_2" value="org.cytoscape.ding.customgraphics.NullCustomGraphics,0,[ Remove Graphics ]," type="string"/>
        <att name="NODE_CUSTOMGRAPHICS_POSITION_4" value="C,C,c,0.00,0.00" type="string"/>
        <att name="NODE_LABEL_FONT_FACE" value="Dialog.plain,plain,18" type="string"/>
        <att name="NODE_CUSTOMGRAPHICS_SIZE_9" value="0.0" type="string"/>
        <att name="NODE_LABEL_COLOR" value="#000000" type="string"/>
        <att name="NODE_LABEL_FONT_SIZE" value="18" type="string"/>
        <att name="NODE_LABEL" value="PPT1" type="string"/>
      </att>
    </graphics>
  </node>
  <node id="2833" label="MRC2" cy:nodeId="2049">
    <graphics y="-903.9145834093666" z="0.0" x="-1322.7640380859375">
      <att name="lockedVisualProperties" type="list">
        <att name="NODE_NESTED_NETWORK_IMAGE_VISIBLE" value="true" type="string"/>
        <att name="NODE_CUSTOMGRAPHICS_SIZE_2" value="0.0" type="string"/>
        <att name="NODE_CUSTOMGRAPHICS_SIZE_6" value="0.0" type="string"/>
        <att name="NODE_BORDER_STROKE" value="SOLID" type="string"/>
        <att name="NODE_CUSTOMGRAPHICS_POSITION_7" value="C,C,c,0.00,0.00" type="string"/>
        <att name="NODE_CUSTOMGRAPHICS_8" value="org.cytoscape.ding.customgraphics.NullCustomGraphics,0,[ Remove Graphics ]," type="string"/>
        <att name="NODE_TRANSPARENCY" value="255" type="string"/>
        <att name="NODE_LABEL_WIDTH" value="200.0" type="string"/>
        <att name="NODE_CUSTOMGRAPHICS_SIZE_1" value="0.0" type="string"/>
        <att name="NODE_CUSTOMGRAPHICS_5" value="org.cytoscape.ding.customgraphics.NullCustomGraphics,0,[ Remove Graphics ]," type="string"/>
        <att name="NODE_CUSTOMGRAPHICS_9" value="org.cytoscape.ding.customgraphics.NullCustomGraphics,0,[ Remove Graphics ]," type="string"/>
        <att name="NODE_CUSTOMGRAPHICS_1" value="org.cytoscape.ding.customgraphics.NullCustomGraphics,0,[ Remove Graphics ]," type="string"/>
        <att name="NODE_CUSTOMGRAPHICS_POSITION_6" value="C,C,c,0.00,0.00" type="string"/>
        <att name="NODE_CUSTOMGRAPHICS_POSITION_2" value="C,C,c,0.00,0.00" type="string"/>
        <att name="NODE_SELECTED_PAINT" value="#FFFF00" type="string"/>
        <att name="NODE_HEIGHT" value="30.0" type="string"/>
        <att name="NODE_CUSTOMGRAPHICS_POSITION_8" value="C,C,c,0.00,0.00" type="string"/>
        <att name="NODE_CUSTOMGRAPHICS_POSITION_9" value="C,C,c,0.00,0.00" type="string"/>
        <att name="NODE_CUSTOMGRAPHICS_POSITION_1" value="C,C,c,0.00,0.00" type="string"/>
        <att name="NODE_BORDER_TRANSPARENCY" value="255" type="string"/>
        <att name="NODE_CUSTOMGRAPHICS_SIZE_3" value="0.0" type="string"/>
        <att name="NODE_CUSTOMGRAPHICS_3" value="org.cytoscape.ding.customgraphics.NullCustomGraphics,0,[ Remove Graphics ]," type="string"/>
        <att name="NODE_CUSTOMGRAPHICS_7" value="org.cytoscape.ding.customgraphics.NullCustomGraphics,0,[ Remove Graphics ]," type="string"/>
        <att name="NODE_CUSTOMGRAPHICS_SIZE_7" value="0.0" type="string"/>
        <att name="NODE_CUSTOMGRAPHICS_SIZE_8" value="0.0" type="string"/>
        <att name="NODE_CUSTOMGRAPHICS_POSITION_5" value="C,C,c,0.00,0.00" type="string"/>
        <att name="NODE_SHAPE" value="ROUND_RECTANGLE" type="string"/>
        <att name="NODE_SELECTED" value="false" type="string"/>
        <att name="NODE_DEPTH" value="0.0" type="string"/>
        <att name="NODE_CUSTOMGRAPHICS_SIZE_5" value="0.0" type="string"/>
        <att name="NODE_FILL_COLOR" value="#C8C8C8" type="string"/>
        <att name="NODE_VISIBLE" value="true" type="string"/>
        <att name="NODE_BORDER_WIDTH" value="0.0" type="string"/>
        <att name="NODE_TOOLTIP" value="" type="string"/>
        <att name="NODE_BORDER_PAINT" value="#006699" type="string"/>
        <att name="NODE_CUSTOMGRAPHICS_6" value="org.cytoscape.ding.customgraphics.NullCustomGraphics,0,[ Remove Graphics ]," type="string"/>
        <att name="NODE_WIDTH" value="80.0" type="string"/>
        <att name="NODE_CUSTOMGRAPHICS_POSITION_3" value="C,C,c,0.00,0.00" type="string"/>
        <att name="NODE_CUSTOMGRAPHICS_4" value="org.cytoscape.ding.customgraphics.NullCustomGraphics,0,[ Remove Graphics ]," type="string"/>
        <att name="NODE_LABEL_POSITION" value="C,C,c,0.00,0.00" type="string"/>
        <att name="NODE_LABEL_TRANSPARENCY" value="255" type="string"/>
        <att name="NODE_CUSTOMGRAPHICS_SIZE_4" value="0.0" type="string"/>
        <att name="NODE_CUSTOMGRAPHICS_2" value="org.cytoscape.ding.customgraphics.NullCustomGraphics,0,[ Remove Graphics ]," type="string"/>
        <att name="NODE_CUSTOMGRAPHICS_POSITION_4" value="C,C,c,0.00,0.00" type="string"/>
        <att name="NODE_LABEL_FONT_FACE" value="Dialog.plain,plain,18" type="string"/>
        <att name="NODE_CUSTOMGRAPHICS_SIZE_9" value="0.0" type="string"/>
        <att name="NODE_LABEL_COLOR" value="#000000" type="string"/>
        <att name="NODE_LABEL_FONT_SIZE" value="18" type="string"/>
        <att name="NODE_LABEL" value="MRC2" type="string"/>
      </att>
    </graphics>
  </node>
  <node id="2832" label="HSPA13" cy:nodeId="2050">
    <graphics y="-883.0143758898354" z="0.0" x="-1483.5706787109375">
      <att name="lockedVisualProperties" type="list">
        <att name="NODE_NESTED_NETWORK_IMAGE_VISIBLE" value="true" type="string"/>
        <att name="NODE_CUSTOMGRAPHICS_SIZE_2" value="0.0" type="string"/>
        <att name="NODE_CUSTOMGRAPHICS_SIZE_6" value="0.0" type="string"/>
        <att name="NODE_BORDER_STROKE" value="SOLID" type="string"/>
        <att name="NODE_CUSTOMGRAPHICS_POSITION_7" value="C,C,c,0.00,0.00" type="string"/>
        <att name="NODE_CUSTOMGRAPHICS_8" value="org.cytoscape.ding.customgraphics.NullCustomGraphics,0,[ Remove Graphics ]," type="string"/>
        <att name="NODE_TRANSPARENCY" value="255" type="string"/>
        <att name="NODE_LABEL_WIDTH" value="200.0" type="string"/>
        <att name="NODE_CUSTOMGRAPHICS_SIZE_1" value="0.0" type="string"/>
        <att name="NODE_CUSTOMGRAPHICS_5" value="org.cytoscape.ding.customgraphics.NullCustomGraphics,0,[ Remove Graphics ]," type="string"/>
        <att name="NODE_CUSTOMGRAPHICS_9" value="org.cytoscape.ding.customgraphics.NullCustomGraphics,0,[ Remove Graphics ]," type="string"/>
        <att name="NODE_CUSTOMGRAPHICS_1" value="org.cytoscape.ding.customgraphics.NullCustomGraphics,0,[ Remove Graphics ]," type="string"/>
        <att name="NODE_CUSTOMGRAPHICS_POSITION_6" value="C,C,c,0.00,0.00" type="string"/>
        <att name="NODE_CUSTOMGRAPHICS_POSITION_2" value="C,C,c,0.00,0.00" type="string"/>
        <att name="NODE_SELECTED_PAINT" value="#FFFF00" type="string"/>
        <att name="NODE_HEIGHT" value="30.0" type="string"/>
        <att name="NODE_CUSTOMGRAPHICS_POSITION_8" value="C,C,c,0.00,0.00" type="string"/>
        <att name="NODE_CUSTOMGRAPHICS_POSITION_9" value="C,C,c,0.00,0.00" type="string"/>
        <att name="NODE_CUSTOMGRAPHICS_POSITION_1" value="C,C,c,0.00,0.00" type="string"/>
        <att name="NODE_BORDER_TRANSPARENCY" value="255" type="string"/>
        <att name="NODE_CUSTOMGRAPHICS_SIZE_3" value="0.0" type="string"/>
        <att name="NODE_CUSTOMGRAPHICS_3" value="org.cytoscape.ding.customgraphics.NullCustomGraphics,0,[ Remove Graphics ]," type="string"/>
        <att name="NODE_CUSTOMGRAPHICS_7" value="org.cytoscape.ding.customgraphics.NullCustomGraphics,0,[ Remove Graphics ]," type="string"/>
        <att name="NODE_CUSTOMGRAPHICS_SIZE_7" value="0.0" type="string"/>
        <att name="NODE_CUSTOMGRAPHICS_SIZE_8" value="0.0" type="string"/>
        <att name="NODE_CUSTOMGRAPHICS_POSITION_5" value="C,C,c,0.00,0.00" type="string"/>
        <att name="NODE_SHAPE" value="ROUND_RECTANGLE" type="string"/>
        <att name="NODE_SELECTED" value="false" type="string"/>
        <att name="NODE_DEPTH" value="0.0" type="string"/>
        <att name="NODE_CUSTOMGRAPHICS_SIZE_5" value="0.0" type="string"/>
        <att name="NODE_FILL_COLOR" value="#C8C8C8" type="string"/>
        <att name="NODE_VISIBLE" value="true" type="string"/>
        <att name="NODE_BORDER_WIDTH" value="0.0" type="string"/>
        <att name="NODE_TOOLTIP" value="" type="string"/>
        <att name="NODE_BORDER_PAINT" value="#006699" type="string"/>
        <att name="NODE_CUSTOMGRAPHICS_6" value="org.cytoscape.ding.customgraphics.NullCustomGraphics,0,[ Remove Graphics ]," type="string"/>
        <att name="NODE_WIDTH" value="80.0" type="string"/>
        <att name="NODE_CUSTOMGRAPHICS_POSITION_3" value="C,C,c,0.00,0.00" type="string"/>
        <att name="NODE_CUSTOMGRAPHICS_4" value="org.cytoscape.ding.customgraphics.NullCustomGraphics,0,[ Remove Graphics ]," type="string"/>
        <att name="NODE_LABEL_POSITION" value="C,C,c,0.00,0.00" type="string"/>
        <att name="NODE_LABEL_TRANSPARENCY" value="255" type="string"/>
        <att name="NODE_CUSTOMGRAPHICS_SIZE_4" value="0.0" type="string"/>
        <att name="NODE_CUSTOMGRAPHICS_2" value="org.cytoscape.ding.customgraphics.NullCustomGraphics,0,[ Remove Graphics ]," type="string"/>
        <att name="NODE_CUSTOMGRAPHICS_POSITION_4" value="C,C,c,0.00,0.00" type="string"/>
        <att name="NODE_LABEL_FONT_FACE" value="Dialog.plain,plain,18" type="string"/>
        <att name="NODE_CUSTOMGRAPHICS_SIZE_9" value="0.0" type="string"/>
        <att name="NODE_LABEL_COLOR" value="#000000" type="string"/>
        <att name="NODE_LABEL_FONT_SIZE" value="18" type="string"/>
        <att name="NODE_LABEL" value="HSPA13" type="string"/>
      </att>
    </graphics>
  </node>
  <node id="2831" label="NOL6" cy:nodeId="2051">
    <graphics y="146.99015844612217" z="0.0" x="256.09168225154826">
      <att name="lockedVisualProperties" type="list">
        <att name="NODE_NESTED_NETWORK_IMAGE_VISIBLE" value="true" type="string"/>
        <att name="NODE_CUSTOMGRAPHICS_SIZE_2" value="0.0" type="string"/>
        <att name="NODE_CUSTOMGRAPHICS_SIZE_6" value="0.0" type="string"/>
        <att name="NODE_BORDER_STROKE" value="SOLID" type="string"/>
        <att name="NODE_CUSTOMGRAPHICS_POSITION_7" value="C,C,c,0.00,0.00" type="string"/>
        <att name="NODE_CUSTOMGRAPHICS_8" value="org.cytoscape.ding.customgraphics.NullCustomGraphics,0,[ Remove Graphics ]," type="string"/>
        <att name="NODE_TRANSPARENCY" value="255" type="string"/>
        <att name="NODE_LABEL_WIDTH" value="200.0" type="string"/>
        <att name="NODE_CUSTOMGRAPHICS_SIZE_1" value="0.0" type="string"/>
        <att name="NODE_CUSTOMGRAPHICS_5" value="org.cytoscape.ding.customgraphics.NullCustomGraphics,0,[ Remove Graphics ]," type="string"/>
        <att name="NODE_CUSTOMGRAPHICS_9" value="org.cytoscape.ding.customgraphics.NullCustomGraphics,0,[ Remove Graphics ]," type="string"/>
        <att name="NODE_CUSTOMGRAPHICS_1" value="org.cytoscape.ding.customgraphics.NullCustomGraphics,0,[ Remove Graphics ]," type="string"/>
        <att name="NODE_CUSTOMGRAPHICS_POSITION_6" value="C,C,c,0.00,0.00" type="string"/>
        <att name="NODE_CUSTOMGRAPHICS_POSITION_2" value="C,C,c,0.00,0.00" type="string"/>
        <att name="NODE_SELECTED_PAINT" value="#FFFF00" type="string"/>
        <att name="NODE_HEIGHT" value="30.0" type="string"/>
        <att name="NODE_CUSTOMGRAPHICS_POSITION_8" value="C,C,c,0.00,0.00" type="string"/>
        <att name="NODE_CUSTOMGRAPHICS_POSITION_9" value="C,C,c,0.00,0.00" type="string"/>
        <att name="NODE_CUSTOMGRAPHICS_POSITION_1" value="C,C,c,0.00,0.00" type="string"/>
        <att name="NODE_BORDER_TRANSPARENCY" value="255" type="string"/>
        <att name="NODE_CUSTOMGRAPHICS_SIZE_3" value="0.0" type="string"/>
        <att name="NODE_CUSTOMGRAPHICS_3" value="org.cytoscape.ding.customgraphics.NullCustomGraphics,0,[ Remove Graphics ]," type="string"/>
        <att name="NODE_CUSTOMGRAPHICS_7" value="org.cytoscape.ding.customgraphics.NullCustomGraphics,0,[ Remove Graphics ]," type="string"/>
        <att name="NODE_CUSTOMGRAPHICS_SIZE_7" value="0.0" type="string"/>
        <att name="NODE_CUSTOMGRAPHICS_SIZE_8" value="0.0" type="string"/>
        <att name="NODE_CUSTOMGRAPHICS_POSITION_5" value="C,C,c,0.00,0.00" type="string"/>
        <att name="NODE_SHAPE" value="ROUND_RECTANGLE" type="string"/>
        <att name="NODE_SELECTED" value="false" type="string"/>
        <att name="NODE_DEPTH" value="0.0" type="string"/>
        <att name="NODE_CUSTOMGRAPHICS_SIZE_5" value="0.0" type="string"/>
        <att name="NODE_FILL_COLOR" value="#C8C8C8" type="string"/>
        <att name="NODE_VISIBLE" value="true" type="string"/>
        <att name="NODE_BORDER_WIDTH" value="0.0" type="string"/>
        <att name="NODE_TOOLTIP" value="" type="string"/>
        <att name="NODE_BORDER_PAINT" value="#006699" type="string"/>
        <att name="NODE_CUSTOMGRAPHICS_6" value="org.cytoscape.ding.customgraphics.NullCustomGraphics,0,[ Remove Graphics ]," type="string"/>
        <att name="NODE_WIDTH" value="80.0" type="string"/>
        <att name="NODE_CUSTOMGRAPHICS_POSITION_3" value="C,C,c,0.00,0.00" type="string"/>
        <att name="NODE_CUSTOMGRAPHICS_4" value="org.cytoscape.ding.customgraphics.NullCustomGraphics,0,[ Remove Graphics ]," type="string"/>
        <att name="NODE_LABEL_POSITION" value="C,C,c,0.00,0.00" type="string"/>
        <att name="NODE_LABEL_TRANSPARENCY" value="255" type="string"/>
        <att name="NODE_CUSTOMGRAPHICS_SIZE_4" value="0.0" type="string"/>
        <att name="NODE_CUSTOMGRAPHICS_2" value="org.cytoscape.ding.customgraphics.NullCustomGraphics,0,[ Remove Graphics ]," type="string"/>
        <att name="NODE_CUSTOMGRAPHICS_POSITION_4" value="C,C,c,0.00,0.00" type="string"/>
        <att name="NODE_LABEL_FONT_FACE" value="Dialog.plain,plain,18" type="string"/>
        <att name="NODE_CUSTOMGRAPHICS_SIZE_9" value="0.0" type="string"/>
        <att name="NODE_LABEL_COLOR" value="#000000" type="string"/>
        <att name="NODE_LABEL_FONT_SIZE" value="18" type="string"/>
        <att name="NODE_LABEL" value="NOL6" type="string"/>
      </att>
    </graphics>
  </node>
  <node id="2830" label="CAMK2B" cy:nodeId="2052">
    <graphics y="-813.1474935656166" z="0.0" x="-1879.662841796875">
      <att name="lockedVisualProperties" type="list">
        <att name="NODE_NESTED_NETWORK_IMAGE_VISIBLE" value="true" type="string"/>
        <att name="NODE_CUSTOMGRAPHICS_SIZE_2" value="0.0" type="string"/>
        <att name="NODE_CUSTOMGRAPHICS_SIZE_6" value="0.0" type="string"/>
        <att name="NODE_BORDER_STROKE" value="SOLID" type="string"/>
        <att name="NODE_CUSTOMGRAPHICS_POSITION_7" value="C,C,c,0.00,0.00" type="string"/>
        <att name="NODE_CUSTOMGRAPHICS_8" value="org.cytoscape.ding.customgraphics.NullCustomGraphics,0,[ Remove Graphics ]," type="string"/>
        <att name="NODE_TRANSPARENCY" value="255" type="string"/>
        <att name="NODE_LABEL_WIDTH" value="200.0" type="string"/>
        <att name="NODE_CUSTOMGRAPHICS_SIZE_1" value="0.0" type="string"/>
        <att name="NODE_CUSTOMGRAPHICS_5" value="org.cytoscape.ding.customgraphics.NullCustomGraphics,0,[ Remove Graphics ]," type="string"/>
        <att name="NODE_CUSTOMGRAPHICS_9" value="org.cytoscape.ding.customgraphics.NullCustomGraphics,0,[ Remove Graphics ]," type="string"/>
        <att name="NODE_CUSTOMGRAPHICS_1" value="org.cytoscape.ding.customgraphics.NullCustomGraphics,0,[ Remove Graphics ]," type="string"/>
        <att name="NODE_CUSTOMGRAPHICS_POSITION_6" value="C,C,c,0.00,0.00" type="string"/>
        <att name="NODE_CUSTOMGRAPHICS_POSITION_2" value="C,C,c,0.00,0.00" type="string"/>
        <att name="NODE_SELECTED_PAINT" value="#FFFF00" type="string"/>
        <att name="NODE_HEIGHT" value="30.0" type="string"/>
        <att name="NODE_CUSTOMGRAPHICS_POSITION_8" value="C,C,c,0.00,0.00" type="string"/>
        <att name="NODE_CUSTOMGRAPHICS_POSITION_9" value="C,C,c,0.00,0.00" type="string"/>
        <att name="NODE_CUSTOMGRAPHICS_POSITION_1" value="C,C,c,0.00,0.00" type="string"/>
        <att name="NODE_BORDER_TRANSPARENCY" value="255" type="string"/>
        <att name="NODE_CUSTOMGRAPHICS_SIZE_3" value="0.0" type="string"/>
        <att name="NODE_CUSTOMGRAPHICS_3" value="org.cytoscape.ding.customgraphics.NullCustomGraphics,0,[ Remove Graphics ]," type="string"/>
        <att name="NODE_CUSTOMGRAPHICS_7" value="org.cytoscape.ding.customgraphics.NullCustomGraphics,0,[ Remove Graphics ]," type="string"/>
        <att name="NODE_CUSTOMGRAPHICS_SIZE_7" value="0.0" type="string"/>
        <att name="NODE_CUSTOMGRAPHICS_SIZE_8" value="0.0" type="string"/>
        <att name="NODE_CUSTOMGRAPHICS_POSITION_5" value="C,C,c,0.00,0.00" type="string"/>
        <att name="NODE_SHAPE" value="ROUND_RECTANGLE" type="string"/>
        <att name="NODE_SELECTED" value="false" type="string"/>
        <att name="NODE_DEPTH" value="0.0" type="string"/>
        <att name="NODE_CUSTOMGRAPHICS_SIZE_5" value="0.0" type="string"/>
        <att name="NODE_FILL_COLOR" value="#C8C8C8" type="string"/>
        <att name="NODE_VISIBLE" value="true" type="string"/>
        <att name="NODE_BORDER_WIDTH" value="0.0" type="string"/>
        <att name="NODE_TOOLTIP" value="" type="string"/>
        <att name="NODE_BORDER_PAINT" value="#006699" type="string"/>
        <att name="NODE_CUSTOMGRAPHICS_6" value="org.cytoscape.ding.customgraphics.NullCustomGraphics,0,[ Remove Graphics ]," type="string"/>
        <att name="NODE_WIDTH" value="80.0" type="string"/>
        <att name="NODE_CUSTOMGRAPHICS_POSITION_3" value="C,C,c,0.00,0.00" type="string"/>
        <att name="NODE_CUSTOMGRAPHICS_4" value="org.cytoscape.ding.customgraphics.NullCustomGraphics,0,[ Remove Graphics ]," type="string"/>
        <att name="NODE_LABEL_POSITION" value="C,C,c,0.00,0.00" type="string"/>
        <att name="NODE_LABEL_TRANSPARENCY" value="255" type="string"/>
        <att name="NODE_CUSTOMGRAPHICS_SIZE_4" value="0.0" type="string"/>
        <att name="NODE_CUSTOMGRAPHICS_2" value="org.cytoscape.ding.customgraphics.NullCustomGraphics,0,[ Remove Graphics ]," type="string"/>
        <att name="NODE_CUSTOMGRAPHICS_POSITION_4" value="C,C,c,0.00,0.00" type="string"/>
        <att name="NODE_LABEL_FONT_FACE" value="Dialog.plain,plain,18" type="string"/>
        <att name="NODE_CUSTOMGRAPHICS_SIZE_9" value="0.0" type="string"/>
        <att name="NODE_LABEL_COLOR" value="#000000" type="string"/>
        <att name="NODE_LABEL_FONT_SIZE" value="18" type="string"/>
        <att name="NODE_LABEL" value="CAMK2B" type="string"/>
      </att>
    </graphics>
  </node>
  <node id="2829" label="CPS1" cy:nodeId="2053">
    <graphics y="-870.4494955187416" z="0.0" x="-1689.4176025390625">
      <att name="lockedVisualProperties" type="list">
        <att name="NODE_NESTED_NETWORK_IMAGE_VISIBLE" value="true" type="string"/>
        <att name="NODE_CUSTOMGRAPHICS_SIZE_2" value="0.0" type="string"/>
        <att name="NODE_CUSTOMGRAPHICS_SIZE_6" value="0.0" type="string"/>
        <att name="NODE_BORDER_STROKE" value="SOLID" type="string"/>
        <att name="NODE_CUSTOMGRAPHICS_POSITION_7" value="C,C,c,0.00,0.00" type="string"/>
        <att name="NODE_CUSTOMGRAPHICS_8" value="org.cytoscape.ding.customgraphics.NullCustomGraphics,0,[ Remove Graphics ]," type="string"/>
        <att name="NODE_TRANSPARENCY" value="255" type="string"/>
        <att name="NODE_LABEL_WIDTH" value="200.0" type="string"/>
        <att name="NODE_CUSTOMGRAPHICS_SIZE_1" value="0.0" type="string"/>
        <att name="NODE_CUSTOMGRAPHICS_5" value="org.cytoscape.ding.customgraphics.NullCustomGraphics,0,[ Remove Graphics ]," type="string"/>
        <att name="NODE_CUSTOMGRAPHICS_9" value="org.cytoscape.ding.customgraphics.NullCustomGraphics,0,[ Remove Graphics ]," type="string"/>
        <att name="NODE_CUSTOMGRAPHICS_1" value="org.cytoscape.ding.customgraphics.NullCustomGraphics,0,[ Remove Graphics ]," type="string"/>
        <att name="NODE_CUSTOMGRAPHICS_POSITION_6" value="C,C,c,0.00,0.00" type="string"/>
        <att name="NODE_CUSTOMGRAPHICS_POSITION_2" value="C,C,c,0.00,0.00" type="string"/>
        <att name="NODE_SELECTED_PAINT" value="#FFFF00" type="string"/>
        <att name="NODE_HEIGHT" value="30.0" type="string"/>
        <att name="NODE_CUSTOMGRAPHICS_POSITION_8" value="C,C,c,0.00,0.00" type="string"/>
        <att name="NODE_CUSTOMGRAPHICS_POSITION_9" value="C,C,c,0.00,0.00" type="string"/>
        <att name="NODE_CUSTOMGRAPHICS_POSITION_1" value="C,C,c,0.00,0.00" type="string"/>
        <att name="NODE_BORDER_TRANSPARENCY" value="255" type="string"/>
        <att name="NODE_CUSTOMGRAPHICS_SIZE_3" value="0.0" type="string"/>
        <att name="NODE_CUSTOMGRAPHICS_3" value="org.cytoscape.ding.customgraphics.NullCustomGraphics,0,[ Remove Graphics ]," type="string"/>
        <att name="NODE_CUSTOMGRAPHICS_7" value="org.cytoscape.ding.customgraphics.NullCustomGraphics,0,[ Remove Graphics ]," type="string"/>
        <att name="NODE_CUSTOMGRAPHICS_SIZE_7" value="0.0" type="string"/>
        <att name="NODE_CUSTOMGRAPHICS_SIZE_8" value="0.0" type="string"/>
        <att name="NODE_CUSTOMGRAPHICS_POSITION_5" value="C,C,c,0.00,0.00" type="string"/>
        <att name="NODE_SHAPE" value="ROUND_RECTANGLE" type="string"/>
        <att name="NODE_SELECTED" value="false" type="string"/>
        <att name="NODE_DEPTH" value="0.0" type="string"/>
        <att name="NODE_CUSTOMGRAPHICS_SIZE_5" value="0.0" type="string"/>
        <att name="NODE_FILL_COLOR" value="#C8C8C8" type="string"/>
        <att name="NODE_VISIBLE" value="true" type="string"/>
        <att name="NODE_BORDER_WIDTH" value="0.0" type="string"/>
        <att name="NODE_TOOLTIP" value="" type="string"/>
        <att name="NODE_BORDER_PAINT" value="#006699" type="string"/>
        <att name="NODE_CUSTOMGRAPHICS_6" value="org.cytoscape.ding.customgraphics.NullCustomGraphics,0,[ Remove Graphics ]," type="string"/>
        <att name="NODE_WIDTH" value="80.0" type="string"/>
        <att name="NODE_CUSTOMGRAPHICS_POSITION_3" value="C,C,c,0.00,0.00" type="string"/>
        <att name="NODE_CUSTOMGRAPHICS_4" value="org.cytoscape.ding.customgraphics.NullCustomGraphics,0,[ Remove Graphics ]," type="string"/>
        <att name="NODE_LABEL_POSITION" value="C,C,c,0.00,0.00" type="string"/>
        <att name="NODE_LABEL_TRANSPARENCY" value="255" type="string"/>
        <att name="NODE_CUSTOMGRAPHICS_SIZE_4" value="0.0" type="string"/>
        <att name="NODE_CUSTOMGRAPHICS_2" value="org.cytoscape.ding.customgraphics.NullCustomGraphics,0,[ Remove Graphics ]," type="string"/>
        <att name="NODE_CUSTOMGRAPHICS_POSITION_4" value="C,C,c,0.00,0.00" type="string"/>
        <att name="NODE_LABEL_FONT_FACE" value="Dialog.plain,plain,18" type="string"/>
        <att name="NODE_CUSTOMGRAPHICS_SIZE_9" value="0.0" type="string"/>
        <att name="NODE_LABEL_COLOR" value="#000000" type="string"/>
        <att name="NODE_LABEL_FONT_SIZE" value="18" type="string"/>
        <att name="NODE_LABEL" value="CPS1" type="string"/>
      </att>
    </graphics>
  </node>
  <node id="2828" label="PCSK5" cy:nodeId="2054">
    <graphics y="303.7007907703409" z="0.0" x="255.55402356014204">
      <att name="lockedVisualProperties" type="list">
        <att name="NODE_NESTED_NETWORK_IMAGE_VISIBLE" value="true" type="string"/>
        <att name="NODE_CUSTOMGRAPHICS_SIZE_2" value="0.0" type="string"/>
        <att name="NODE_CUSTOMGRAPHICS_SIZE_6" value="0.0" type="string"/>
        <att name="NODE_BORDER_STROKE" value="SOLID" type="string"/>
        <att name="NODE_CUSTOMGRAPHICS_POSITION_7" value="C,C,c,0.00,0.00" type="string"/>
        <att name="NODE_CUSTOMGRAPHICS_8" value="org.cytoscape.ding.customgraphics.NullCustomGraphics,0,[ Remove Graphics ]," type="string"/>
        <att name="NODE_TRANSPARENCY" value="255" type="string"/>
        <att name="NODE_LABEL_WIDTH" value="200.0" type="string"/>
        <att name="NODE_CUSTOMGRAPHICS_SIZE_1" value="0.0" type="string"/>
        <att name="NODE_CUSTOMGRAPHICS_5" value="org.cytoscape.ding.customgraphics.NullCustomGraphics,0,[ Remove Graphics ]," type="string"/>
        <att name="NODE_CUSTOMGRAPHICS_9" value="org.cytoscape.ding.customgraphics.NullCustomGraphics,0,[ Remove Graphics ]," type="string"/>
        <att name="NODE_CUSTOMGRAPHICS_1" value="org.cytoscape.ding.customgraphics.NullCustomGraphics,0,[ Remove Graphics ]," type="string"/>
        <att name="NODE_CUSTOMGRAPHICS_POSITION_6" value="C,C,c,0.00,0.00" type="string"/>
        <att name="NODE_CUSTOMGRAPHICS_POSITION_2" value="C,C,c,0.00,0.00" type="string"/>
        <att name="NODE_SELECTED_PAINT" value="#FFFF00" type="string"/>
        <att name="NODE_HEIGHT" value="30.0" type="string"/>
        <att name="NODE_CUSTOMGRAPHICS_POSITION_8" value="C,C,c,0.00,0.00" type="string"/>
        <att name="NODE_CUSTOMGRAPHICS_POSITION_9" value="C,C,c,0.00,0.00" type="string"/>
        <att name="NODE_CUSTOMGRAPHICS_POSITION_1" value="C,C,c,0.00,0.00" type="string"/>
        <att name="NODE_BORDER_TRANSPARENCY" value="255" type="string"/>
        <att name="NODE_CUSTOMGRAPHICS_SIZE_3" value="0.0" type="string"/>
        <att name="NODE_CUSTOMGRAPHICS_3" value="org.cytoscape.ding.customgraphics.NullCustomGraphics,0,[ Remove Graphics ]," type="string"/>
        <att name="NODE_CUSTOMGRAPHICS_7" value="org.cytoscape.ding.customgraphics.NullCustomGraphics,0,[ Remove Graphics ]," type="string"/>
        <att name="NODE_CUSTOMGRAPHICS_SIZE_7" value="0.0" type="string"/>
        <att name="NODE_CUSTOMGRAPHICS_SIZE_8" value="0.0" type="string"/>
        <att name="NODE_CUSTOMGRAPHICS_POSITION_5" value="C,C,c,0.00,0.00" type="string"/>
        <att name="NODE_SHAPE" value="ROUND_RECTANGLE" type="string"/>
        <att name="NODE_SELECTED" value="false" type="string"/>
        <att name="NODE_DEPTH" value="0.0" type="string"/>
        <att name="NODE_CUSTOMGRAPHICS_SIZE_5" value="0.0" type="string"/>
        <att name="NODE_FILL_COLOR" value="#C8C8C8" type="string"/>
        <att name="NODE_VISIBLE" value="true" type="string"/>
        <att name="NODE_BORDER_WIDTH" value="0.0" type="string"/>
        <att name="NODE_TOOLTIP" value="" type="string"/>
        <att name="NODE_BORDER_PAINT" value="#006699" type="string"/>
        <att name="NODE_CUSTOMGRAPHICS_6" value="org.cytoscape.ding.customgraphics.NullCustomGraphics,0,[ Remove Graphics ]," type="string"/>
        <att name="NODE_WIDTH" value="80.0" type="string"/>
        <att name="NODE_CUSTOMGRAPHICS_POSITION_3" value="C,C,c,0.00,0.00" type="string"/>
        <att name="NODE_CUSTOMGRAPHICS_4" value="org.cytoscape.ding.customgraphics.NullCustomGraphics,0,[ Remove Graphics ]," type="string"/>
        <att name="NODE_LABEL_POSITION" value="C,C,c,0.00,0.00" type="string"/>
        <att name="NODE_LABEL_TRANSPARENCY" value="255" type="string"/>
        <att name="NODE_CUSTOMGRAPHICS_SIZE_4" value="0.0" type="string"/>
        <att name="NODE_CUSTOMGRAPHICS_2" value="org.cytoscape.ding.customgraphics.NullCustomGraphics,0,[ Remove Graphics ]," type="string"/>
        <att name="NODE_CUSTOMGRAPHICS_POSITION_4" value="C,C,c,0.00,0.00" type="string"/>
        <att name="NODE_LABEL_FONT_FACE" value="Dialog.plain,plain,18" type="string"/>
        <att name="NODE_CUSTOMGRAPHICS_SIZE_9" value="0.0" type="string"/>
        <att name="NODE_LABEL_COLOR" value="#000000" type="string"/>
        <att name="NODE_LABEL_FONT_SIZE" value="18" type="string"/>
        <att name="NODE_LABEL" value="PCSK5" type="string"/>
      </att>
    </graphics>
  </node>
  <node id="2827" label="ADSS" cy:nodeId="2055">
    <graphics y="-901.7273275499916" z="0.0" x="-1987.705322265625">
      <att name="lockedVisualProperties" type="list">
        <att name="NODE_NESTED_NETWORK_IMAGE_VISIBLE" value="true" type="string"/>
        <att name="NODE_CUSTOMGRAPHICS_SIZE_2" value="0.0" type="string"/>
        <att name="NODE_CUSTOMGRAPHICS_SIZE_6" value="0.0" type="string"/>
        <att name="NODE_BORDER_STROKE" value="SOLID" type="string"/>
        <att name="NODE_CUSTOMGRAPHICS_POSITION_7" value="C,C,c,0.00,0.00" type="string"/>
        <att name="NODE_CUSTOMGRAPHICS_8" value="org.cytoscape.ding.customgraphics.NullCustomGraphics,0,[ Remove Graphics ]," type="string"/>
        <att name="NODE_TRANSPARENCY" value="255" type="string"/>
        <att name="NODE_LABEL_WIDTH" value="200.0" type="string"/>
        <att name="NODE_CUSTOMGRAPHICS_SIZE_1" value="0.0" type="string"/>
        <att name="NODE_CUSTOMGRAPHICS_5" value="org.cytoscape.ding.customgraphics.NullCustomGraphics,0,[ Remove Graphics ]," type="string"/>
        <att name="NODE_CUSTOMGRAPHICS_9" value="org.cytoscape.ding.customgraphics.NullCustomGraphics,0,[ Remove Graphics ]," type="string"/>
        <att name="NODE_CUSTOMGRAPHICS_1" value="org.cytoscape.ding.customgraphics.NullCustomGraphics,0,[ Remove Graphics ]," type="string"/>
        <att name="NODE_CUSTOMGRAPHICS_POSITION_6" value="C,C,c,0.00,0.00" type="string"/>
        <att name="NODE_CUSTOMGRAPHICS_POSITION_2" value="C,C,c,0.00,0.00" type="string"/>
        <att name="NODE_SELECTED_PAINT" value="#FFFF00" type="string"/>
        <att name="NODE_HEIGHT" value="30.0" type="string"/>
        <att name="NODE_CUSTOMGRAPHICS_POSITION_8" value="C,C,c,0.00,0.00" type="string"/>
        <att name="NODE_CUSTOMGRAPHICS_POSITION_9" value="C,C,c,0.00,0.00" type="string"/>
        <att name="NODE_CUSTOMGRAPHICS_POSITION_1" value="C,C,c,0.00,0.00" type="string"/>
        <att name="NODE_BORDER_TRANSPARENCY" value="255" type="string"/>
        <att name="NODE_CUSTOMGRAPHICS_SIZE_3" value="0.0" type="string"/>
        <att name="NODE_CUSTOMGRAPHICS_3" value="org.cytoscape.ding.customgraphics.NullCustomGraphics,0,[ Remove Graphics ]," type="string"/>
        <att name="NODE_CUSTOMGRAPHICS_7" value="org.cytoscape.ding.customgraphics.NullCustomGraphics,0,[ Remove Graphics ]," type="string"/>
        <att name="NODE_CUSTOMGRAPHICS_SIZE_7" value="0.0" type="string"/>
        <att name="NODE_CUSTOMGRAPHICS_SIZE_8" value="0.0" type="string"/>
        <att name="NODE_CUSTOMGRAPHICS_POSITION_5" value="C,C,c,0.00,0.00" type="string"/>
        <att name="NODE_SHAPE" value="ROUND_RECTANGLE" type="string"/>
        <att name="NODE_SELECTED" value="false" type="string"/>
        <att name="NODE_DEPTH" value="0.0" type="string"/>
        <att name="NODE_CUSTOMGRAPHICS_SIZE_5" value="0.0" type="string"/>
        <att name="NODE_FILL_COLOR" value="#C8C8C8" type="string"/>
        <att name="NODE_VISIBLE" value="true" type="string"/>
        <att name="NODE_BORDER_WIDTH" value="0.0" type="string"/>
        <att name="NODE_TOOLTIP" value="" type="string"/>
        <att name="NODE_BORDER_PAINT" value="#006699" type="string"/>
        <att name="NODE_CUSTOMGRAPHICS_6" value="org.cytoscape.ding.customgraphics.NullCustomGraphics,0,[ Remove Graphics ]," type="string"/>
        <att name="NODE_WIDTH" value="80.0" type="string"/>
        <att name="NODE_CUSTOMGRAPHICS_POSITION_3" value="C,C,c,0.00,0.00" type="string"/>
        <att name="NODE_CUSTOMGRAPHICS_4" value="org.cytoscape.ding.customgraphics.NullCustomGraphics,0,[ Remove Graphics ]," type="string"/>
        <att name="NODE_LABEL_POSITION" value="C,C,c,0.00,0.00" type="string"/>
        <att name="NODE_LABEL_TRANSPARENCY" value="255" type="string"/>
        <att name="NODE_CUSTOMGRAPHICS_SIZE_4" value="0.0" type="string"/>
        <att name="NODE_CUSTOMGRAPHICS_2" value="org.cytoscape.ding.customgraphics.NullCustomGraphics,0,[ Remove Graphics ]," type="string"/>
        <att name="NODE_CUSTOMGRAPHICS_POSITION_4" value="C,C,c,0.00,0.00" type="string"/>
        <att name="NODE_LABEL_FONT_FACE" value="Dialog.plain,plain,18" type="string"/>
        <att name="NODE_CUSTOMGRAPHICS_SIZE_9" value="0.0" type="string"/>
        <att name="NODE_LABEL_COLOR" value="#000000" type="string"/>
        <att name="NODE_LABEL_FONT_SIZE" value="18" type="string"/>
        <att name="NODE_LABEL" value="ADSS" type="string"/>
      </att>
    </graphics>
  </node>
  <node id="2826" label="RFC4" cy:nodeId="2056">
    <graphics y="-850.1869833117104" z="0.0" x="-1042.635009765625">
      <att name="lockedVisualProperties" type="list">
        <att name="NODE_NESTED_NETWORK_IMAGE_VISIBLE" value="true" type="string"/>
        <att name="NODE_CUSTOMGRAPHICS_SIZE_2" value="0.0" type="string"/>
        <att name="NODE_CUSTOMGRAPHICS_SIZE_6" value="0.0" type="string"/>
        <att name="NODE_BORDER_STROKE" value="SOLID" type="string"/>
        <att name="NODE_CUSTOMGRAPHICS_POSITION_7" value="C,C,c,0.00,0.00" type="string"/>
        <att name="NODE_CUSTOMGRAPHICS_8" value="org.cytoscape.ding.customgraphics.NullCustomGraphics,0,[ Remove Graphics ]," type="string"/>
        <att name="NODE_TRANSPARENCY" value="255" type="string"/>
        <att name="NODE_LABEL_WIDTH" value="200.0" type="string"/>
        <att name="NODE_CUSTOMGRAPHICS_SIZE_1" value="0.0" type="string"/>
        <att name="NODE_CUSTOMGRAPHICS_5" value="org.cytoscape.ding.customgraphics.NullCustomGraphics,0,[ Remove Graphics ]," type="string"/>
        <att name="NODE_CUSTOMGRAPHICS_9" value="org.cytoscape.ding.customgraphics.NullCustomGraphics,0,[ Remove Graphics ]," type="string"/>
        <att name="NODE_CUSTOMGRAPHICS_1" value="org.cytoscape.ding.customgraphics.NullCustomGraphics,0,[ Remove Graphics ]," type="string"/>
        <att name="NODE_CUSTOMGRAPHICS_POSITION_6" value="C,C,c,0.00,0.00" type="string"/>
        <att name="NODE_CUSTOMGRAPHICS_POSITION_2" value="C,C,c,0.00,0.00" type="string"/>
        <att name="NODE_SELECTED_PAINT" value="#FFFF00" type="string"/>
        <att name="NODE_HEIGHT" value="30.0" type="string"/>
        <att name="NODE_CUSTOMGRAPHICS_POSITION_8" value="C,C,c,0.00,0.00" type="string"/>
        <att name="NODE_CUSTOMGRAPHICS_POSITION_9" value="C,C,c,0.00,0.00" type="string"/>
        <att name="NODE_CUSTOMGRAPHICS_POSITION_1" value="C,C,c,0.00,0.00" type="string"/>
        <att name="NODE_BORDER_TRANSPARENCY" value="255" type="string"/>
        <att name="NODE_CUSTOMGRAPHICS_SIZE_3" value="0.0" type="string"/>
        <att name="NODE_CUSTOMGRAPHICS_3" value="org.cytoscape.ding.customgraphics.NullCustomGraphics,0,[ Remove Graphics ]," type="string"/>
        <att name="NODE_CUSTOMGRAPHICS_7" value="org.cytoscape.ding.customgraphics.NullCustomGraphics,0,[ Remove Graphics ]," type="string"/>
        <att name="NODE_CUSTOMGRAPHICS_SIZE_7" value="0.0" type="string"/>
        <att name="NODE_CUSTOMGRAPHICS_SIZE_8" value="0.0" type="string"/>
        <att name="NODE_CUSTOMGRAPHICS_POSITION_5" value="C,C,c,0.00,0.00" type="string"/>
        <att name="NODE_SHAPE" value="ROUND_RECTANGLE" type="string"/>
        <att name="NODE_SELECTED" value="false" type="string"/>
        <att name="NODE_DEPTH" value="0.0" type="string"/>
        <att name="NODE_CUSTOMGRAPHICS_SIZE_5" value="0.0" type="string"/>
        <att name="NODE_FILL_COLOR" value="#C8C8C8" type="string"/>
        <att name="NODE_VISIBLE" value="true" type="string"/>
        <att name="NODE_BORDER_WIDTH" value="0.0" type="string"/>
        <att name="NODE_TOOLTIP" value="" type="string"/>
        <att name="NODE_BORDER_PAINT" value="#006699" type="string"/>
        <att name="NODE_CUSTOMGRAPHICS_6" value="org.cytoscape.ding.customgraphics.NullCustomGraphics,0,[ Remove Graphics ]," type="string"/>
        <att name="NODE_WIDTH" value="80.0" type="string"/>
        <att name="NODE_CUSTOMGRAPHICS_POSITION_3" value="C,C,c,0.00,0.00" type="string"/>
        <att name="NODE_CUSTOMGRAPHICS_4" value="org.cytoscape.ding.customgraphics.NullCustomGraphics,0,[ Remove Graphics ]," type="string"/>
        <att name="NODE_LABEL_POSITION" value="C,C,c,0.00,0.00" type="string"/>
        <att name="NODE_LABEL_TRANSPARENCY" value="255" type="string"/>
        <att name="NODE_CUSTOMGRAPHICS_SIZE_4" value="0.0" type="string"/>
        <att name="NODE_CUSTOMGRAPHICS_2" value="org.cytoscape.ding.customgraphics.NullCustomGraphics,0,[ Remove Graphics ]," type="string"/>
        <att name="NODE_CUSTOMGRAPHICS_POSITION_4" value="C,C,c,0.00,0.00" type="string"/>
        <att name="NODE_LABEL_FONT_FACE" value="Dialog.plain,plain,18" type="string"/>
        <att name="NODE_CUSTOMGRAPHICS_SIZE_9" value="0.0" type="string"/>
        <att name="NODE_LABEL_COLOR" value="#000000" type="string"/>
        <att name="NODE_LABEL_FONT_SIZE" value="18" type="string"/>
        <att name="NODE_LABEL" value="RFC4" type="string"/>
      </att>
    </graphics>
  </node>
  <node id="2825" label="ART4" cy:nodeId="2057">
    <graphics y="-268.57177734375" z="0.0" x="-945.2151553263841">
      <att name="lockedVisualProperties" type="list">
        <att name="NODE_NESTED_NETWORK_IMAGE_VISIBLE" value="true" type="string"/>
        <att name="NODE_CUSTOMGRAPHICS_SIZE_2" value="0.0" type="string"/>
        <att name="NODE_CUSTOMGRAPHICS_SIZE_6" value="0.0" type="string"/>
        <att name="NODE_BORDER_STROKE" value="SOLID" type="string"/>
        <att name="NODE_CUSTOMGRAPHICS_POSITION_7" value="C,C,c,0.00,0.00" type="string"/>
        <att name="NODE_CUSTOMGRAPHICS_8" value="org.cytoscape.ding.customgraphics.NullCustomGraphics,0,[ Remove Graphics ]," type="string"/>
        <att name="NODE_TRANSPARENCY" value="255" type="string"/>
        <att name="NODE_LABEL_WIDTH" value="200.0" type="string"/>
        <att name="NODE_CUSTOMGRAPHICS_SIZE_1" value="0.0" type="string"/>
        <att name="NODE_CUSTOMGRAPHICS_5" value="org.cytoscape.ding.customgraphics.NullCustomGraphics,0,[ Remove Graphics ]," type="string"/>
        <att name="NODE_CUSTOMGRAPHICS_9" value="org.cytoscape.ding.customgraphics.NullCustomGraphics,0,[ Remove Graphics ]," type="string"/>
        <att name="NODE_CUSTOMGRAPHICS_1" value="org.cytoscape.ding.customgraphics.NullCustomGraphics,0,[ Remove Graphics ]," type="string"/>
        <att name="NODE_CUSTOMGRAPHICS_POSITION_6" value="C,C,c,0.00,0.00" type="string"/>
        <att name="NODE_CUSTOMGRAPHICS_POSITION_2" value="C,C,c,0.00,0.00" type="string"/>
        <att name="NODE_SELECTED_PAINT" value="#FFFF00" type="string"/>
        <att name="NODE_HEIGHT" value="30.0" type="string"/>
        <att name="NODE_CUSTOMGRAPHICS_POSITION_8" value="C,C,c,0.00,0.00" type="string"/>
        <att name="NODE_CUSTOMGRAPHICS_POSITION_9" value="C,C,c,0.00,0.00" type="string"/>
        <att name="NODE_CUSTOMGRAPHICS_POSITION_1" value="C,C,c,0.00,0.00" type="string"/>
        <att name="NODE_BORDER_TRANSPARENCY" value="255" type="string"/>
        <att name="NODE_CUSTOMGRAPHICS_SIZE_3" value="0.0" type="string"/>
        <att name="NODE_CUSTOMGRAPHICS_3" value="org.cytoscape.ding.customgraphics.NullCustomGraphics,0,[ Remove Graphics ]," type="string"/>
        <att name="NODE_CUSTOMGRAPHICS_7" value="org.cytoscape.ding.customgraphics.NullCustomGraphics,0,[ Remove Graphics ]," type="string"/>
        <att name="NODE_CUSTOMGRAPHICS_SIZE_7" value="0.0" type="string"/>
        <att name="NODE_CUSTOMGRAPHICS_SIZE_8" value="0.0" type="string"/>
        <att name="NODE_CUSTOMGRAPHICS_POSITION_5" value="C,C,c,0.00,0.00" type="string"/>
        <att name="NODE_SHAPE" value="ROUND_RECTANGLE" type="string"/>
        <att name="NODE_SELECTED" value="false" type="string"/>
        <att name="NODE_DEPTH" value="0.0" type="string"/>
        <att name="NODE_CUSTOMGRAPHICS_SIZE_5" value="0.0" type="string"/>
        <att name="NODE_FILL_COLOR" value="#C8C8C8" type="string"/>
        <att name="NODE_VISIBLE" value="true" type="string"/>
        <att name="NODE_BORDER_WIDTH" value="0.0" type="string"/>
        <att name="NODE_TOOLTIP" value="" type="string"/>
        <att name="NODE_BORDER_PAINT" value="#006699" type="string"/>
        <att name="NODE_CUSTOMGRAPHICS_6" value="org.cytoscape.ding.customgraphics.NullCustomGraphics,0,[ Remove Graphics ]," type="string"/>
        <att name="NODE_WIDTH" value="80.0" type="string"/>
        <att name="NODE_CUSTOMGRAPHICS_POSITION_3" value="C,C,c,0.00,0.00" type="string"/>
        <att name="NODE_CUSTOMGRAPHICS_4" value="org.cytoscape.ding.customgraphics.NullCustomGraphics,0,[ Remove Graphics ]," type="string"/>
        <att name="NODE_LABEL_POSITION" value="C,C,c,0.00,0.00" type="string"/>
        <att name="NODE_LABEL_TRANSPARENCY" value="255" type="string"/>
        <att name="NODE_CUSTOMGRAPHICS_SIZE_4" value="0.0" type="string"/>
        <att name="NODE_CUSTOMGRAPHICS_2" value="org.cytoscape.ding.customgraphics.NullCustomGraphics,0,[ Remove Graphics ]," type="string"/>
        <att name="NODE_CUSTOMGRAPHICS_POSITION_4" value="C,C,c,0.00,0.00" type="string"/>
        <att name="NODE_LABEL_FONT_FACE" value="Dialog.plain,plain,18" type="string"/>
        <att name="NODE_CUSTOMGRAPHICS_SIZE_9" value="0.0" type="string"/>
        <att name="NODE_LABEL_COLOR" value="#000000" type="string"/>
        <att name="NODE_LABEL_FONT_SIZE" value="18" type="string"/>
        <att name="NODE_LABEL" value="ART4" type="string"/>
      </att>
    </graphics>
  </node>
  <node id="2824" label="PRSS3" cy:nodeId="2058">
    <graphics y="-933.9938680773354" z="0.0" x="-1043.5977783203125">
      <att name="lockedVisualProperties" type="list">
        <att name="NODE_NESTED_NETWORK_IMAGE_VISIBLE" value="true" type="string"/>
        <att name="NODE_CUSTOMGRAPHICS_SIZE_2" value="0.0" type="string"/>
        <att name="NODE_CUSTOMGRAPHICS_SIZE_6" value="0.0" type="string"/>
        <att name="NODE_BORDER_STROKE" value="SOLID" type="string"/>
        <att name="NODE_CUSTOMGRAPHICS_POSITION_7" value="C,C,c,0.00,0.00" type="string"/>
        <att name="NODE_CUSTOMGRAPHICS_8" value="org.cytoscape.ding.customgraphics.NullCustomGraphics,0,[ Remove Graphics ]," type="string"/>
        <att name="NODE_TRANSPARENCY" value="255" type="string"/>
        <att name="NODE_LABEL_WIDTH" value="200.0" type="string"/>
        <att name="NODE_CUSTOMGRAPHICS_SIZE_1" value="0.0" type="string"/>
        <att name="NODE_CUSTOMGRAPHICS_5" value="org.cytoscape.ding.customgraphics.NullCustomGraphics,0,[ Remove Graphics ]," type="string"/>
        <att name="NODE_CUSTOMGRAPHICS_9" value="org.cytoscape.ding.customgraphics.NullCustomGraphics,0,[ Remove Graphics ]," type="string"/>
        <att name="NODE_CUSTOMGRAPHICS_1" value="org.cytoscape.ding.customgraphics.NullCustomGraphics,0,[ Remove Graphics ]," type="string"/>
        <att name="NODE_CUSTOMGRAPHICS_POSITION_6" value="C,C,c,0.00,0.00" type="string"/>
        <att name="NODE_CUSTOMGRAPHICS_POSITION_2" value="C,C,c,0.00,0.00" type="string"/>
        <att name="NODE_SELECTED_PAINT" value="#FFFF00" type="string"/>
        <att name="NODE_HEIGHT" value="30.0" type="string"/>
        <att name="NODE_CUSTOMGRAPHICS_POSITION_8" value="C,C,c,0.00,0.00" type="string"/>
        <att name="NODE_CUSTOMGRAPHICS_POSITION_9" value="C,C,c,0.00,0.00" type="string"/>
        <att name="NODE_CUSTOMGRAPHICS_POSITION_1" value="C,C,c,0.00,0.00" type="string"/>
        <att name="NODE_BORDER_TRANSPARENCY" value="255" type="string"/>
        <att name="NODE_CUSTOMGRAPHICS_SIZE_3" value="0.0" type="string"/>
        <att name="NODE_CUSTOMGRAPHICS_3" value="org.cytoscape.ding.customgraphics.NullCustomGraphics,0,[ Remove Graphics ]," type="string"/>
        <att name="NODE_CUSTOMGRAPHICS_7" value="org.cytoscape.ding.customgraphics.NullCustomGraphics,0,[ Remove Graphics ]," type="string"/>
        <att name="NODE_CUSTOMGRAPHICS_SIZE_7" value="0.0" type="string"/>
        <att name="NODE_CUSTOMGRAPHICS_SIZE_8" value="0.0" type="string"/>
        <att name="NODE_CUSTOMGRAPHICS_POSITION_5" value="C,C,c,0.00,0.00" type="string"/>
        <att name="NODE_SHAPE" value="ROUND_RECTANGLE" type="string"/>
        <att name="NODE_SELECTED" value="false" type="string"/>
        <att name="NODE_DEPTH" value="0.0" type="string"/>
        <att name="NODE_CUSTOMGRAPHICS_SIZE_5" value="0.0" type="string"/>
        <att name="NODE_FILL_COLOR" value="#C8C8C8" type="string"/>
        <att name="NODE_VISIBLE" value="true" type="string"/>
        <att name="NODE_BORDER_WIDTH" value="0.0" type="string"/>
        <att name="NODE_TOOLTIP" value="" type="string"/>
        <att name="NODE_BORDER_PAINT" value="#006699" type="string"/>
        <att name="NODE_CUSTOMGRAPHICS_6" value="org.cytoscape.ding.customgraphics.NullCustomGraphics,0,[ Remove Graphics ]," type="string"/>
        <att name="NODE_WIDTH" value="80.0" type="string"/>
        <att name="NODE_CUSTOMGRAPHICS_POSITION_3" value="C,C,c,0.00,0.00" type="string"/>
        <att name="NODE_CUSTOMGRAPHICS_4" value="org.cytoscape.ding.customgraphics.NullCustomGraphics,0,[ Remove Graphics ]," type="string"/>
        <att name="NODE_LABEL_POSITION" value="C,C,c,0.00,0.00" type="string"/>
        <att name="NODE_LABEL_TRANSPARENCY" value="255" type="string"/>
        <att name="NODE_CUSTOMGRAPHICS_SIZE_4" value="0.0" type="string"/>
        <att name="NODE_CUSTOMGRAPHICS_2" value="org.cytoscape.ding.customgraphics.NullCustomGraphics,0,[ Remove Graphics ]," type="string"/>
        <att name="NODE_CUSTOMGRAPHICS_POSITION_4" value="C,C,c,0.00,0.00" type="string"/>
        <att name="NODE_LABEL_FONT_FACE" value="Dialog.plain,plain,18" type="string"/>
        <att name="NODE_CUSTOMGRAPHICS_SIZE_9" value="0.0" type="string"/>
        <att name="NODE_LABEL_COLOR" value="#000000" type="string"/>
        <att name="NODE_LABEL_FONT_SIZE" value="18" type="string"/>
        <att name="NODE_LABEL" value="PRSS3" type="string"/>
      </att>
    </graphics>
  </node>
  <node id="2823" label="AZI2" cy:nodeId="2059">
    <graphics y="-265.03155517578125" z="0.0" x="-759.8533389201341">
      <att name="lockedVisualProperties" type="list">
        <att name="NODE_NESTED_NETWORK_IMAGE_VISIBLE" value="true" type="string"/>
        <att name="NODE_CUSTOMGRAPHICS_SIZE_2" value="0.0" type="string"/>
        <att name="NODE_CUSTOMGRAPHICS_SIZE_6" value="0.0" type="string"/>
        <att name="NODE_BORDER_STROKE" value="SOLID" type="string"/>
        <att name="NODE_CUSTOMGRAPHICS_POSITION_7" value="C,C,c,0.00,0.00" type="string"/>
        <att name="NODE_CUSTOMGRAPHICS_8" value="org.cytoscape.ding.customgraphics.NullCustomGraphics,0,[ Remove Graphics ]," type="string"/>
        <att name="NODE_TRANSPARENCY" value="255" type="string"/>
        <att name="NODE_LABEL_WIDTH" value="200.0" type="string"/>
        <att name="NODE_CUSTOMGRAPHICS_SIZE_1" value="0.0" type="string"/>
        <att name="NODE_CUSTOMGRAPHICS_5" value="org.cytoscape.ding.customgraphics.NullCustomGraphics,0,[ Remove Graphics ]," type="string"/>
        <att name="NODE_CUSTOMGRAPHICS_9" value="org.cytoscape.ding.customgraphics.NullCustomGraphics,0,[ Remove Graphics ]," type="string"/>
        <att name="NODE_CUSTOMGRAPHICS_1" value="org.cytoscape.ding.customgraphics.NullCustomGraphics,0,[ Remove Graphics ]," type="string"/>
        <att name="NODE_CUSTOMGRAPHICS_POSITION_6" value="C,C,c,0.00,0.00" type="string"/>
        <att name="NODE_CUSTOMGRAPHICS_POSITION_2" value="C,C,c,0.00,0.00" type="string"/>
        <att name="NODE_SELECTED_PAINT" value="#FFFF00" type="string"/>
        <att name="NODE_HEIGHT" value="30.0" type="string"/>
        <att name="NODE_CUSTOMGRAPHICS_POSITION_8" value="C,C,c,0.00,0.00" type="string"/>
        <att name="NODE_CUSTOMGRAPHICS_POSITION_9" value="C,C,c,0.00,0.00" type="string"/>
        <att name="NODE_CUSTOMGRAPHICS_POSITION_1" value="C,C,c,0.00,0.00" type="string"/>
        <att name="NODE_BORDER_TRANSPARENCY" value="255" type="string"/>
        <att name="NODE_CUSTOMGRAPHICS_SIZE_3" value="0.0" type="string"/>
        <att name="NODE_CUSTOMGRAPHICS_3" value="org.cytoscape.ding.customgraphics.NullCustomGraphics,0,[ Remove Graphics ]," type="string"/>
        <att name="NODE_CUSTOMGRAPHICS_7" value="org.cytoscape.ding.customgraphics.NullCustomGraphics,0,[ Remove Graphics ]," type="string"/>
        <att name="NODE_CUSTOMGRAPHICS_SIZE_7" value="0.0" type="string"/>
        <att name="NODE_CUSTOMGRAPHICS_SIZE_8" value="0.0" type="string"/>
        <att name="NODE_CUSTOMGRAPHICS_POSITION_5" value="C,C,c,0.00,0.00" type="string"/>
        <att name="NODE_SHAPE" value="ROUND_RECTANGLE" type="string"/>
        <att name="NODE_SELECTED" value="false" type="string"/>
        <att name="NODE_DEPTH" value="0.0" type="string"/>
        <att name="NODE_CUSTOMGRAPHICS_SIZE_5" value="0.0" type="string"/>
        <att name="NODE_FILL_COLOR" value="#FF9F1C" type="string"/>
        <att name="NODE_VISIBLE" value="true" type="string"/>
        <att name="NODE_BORDER_WIDTH" value="0.0" type="string"/>
        <att name="NODE_TOOLTIP" value="" type="string"/>
        <att name="NODE_BORDER_PAINT" value="#006699" type="string"/>
        <att name="NODE_CUSTOMGRAPHICS_6" value="org.cytoscape.ding.customgraphics.NullCustomGraphics,0,[ Remove Graphics ]," type="string"/>
        <att name="NODE_WIDTH" value="80.0" type="string"/>
        <att name="NODE_CUSTOMGRAPHICS_POSITION_3" value="C,C,c,0.00,0.00" type="string"/>
        <att name="NODE_CUSTOMGRAPHICS_4" value="org.cytoscape.ding.customgraphics.NullCustomGraphics,0,[ Remove Graphics ]," type="string"/>
        <att name="NODE_LABEL_POSITION" value="C,C,c,0.00,0.00" type="string"/>
        <att name="NODE_LABEL_TRANSPARENCY" value="255" type="string"/>
        <att name="NODE_CUSTOMGRAPHICS_SIZE_4" value="0.0" type="string"/>
        <att name="NODE_CUSTOMGRAPHICS_2" value="org.cytoscape.ding.customgraphics.NullCustomGraphics,0,[ Remove Graphics ]," type="string"/>
        <att name="NODE_CUSTOMGRAPHICS_POSITION_4" value="C,C,c,0.00,0.00" type="string"/>
        <att name="NODE_LABEL_FONT_FACE" value="Dialog.plain,plain,18" type="string"/>
        <att name="NODE_CUSTOMGRAPHICS_SIZE_9" value="0.0" type="string"/>
        <att name="NODE_LABEL_COLOR" value="#000000" type="string"/>
        <att name="NODE_LABEL_FONT_SIZE" value="18" type="string"/>
        <att name="NODE_LABEL" value="AZI2" type="string"/>
      </att>
    </graphics>
  </node>
  <node id="2822" label="NPEPPSL1" cy:nodeId="2060">
    <graphics y="-692.5362875109291" z="0.0" x="-1327.6318359375">
      <att name="lockedVisualProperties" type="list">
        <att name="NODE_NESTED_NETWORK_IMAGE_VISIBLE" value="true" type="string"/>
        <att name="NODE_CUSTOMGRAPHICS_SIZE_2" value="0.0" type="string"/>
        <att name="NODE_CUSTOMGRAPHICS_SIZE_6" value="0.0" type="string"/>
        <att name="NODE_BORDER_STROKE" value="SOLID" type="string"/>
        <att name="NODE_CUSTOMGRAPHICS_POSITION_7" value="C,C,c,0.00,0.00" type="string"/>
        <att name="NODE_CUSTOMGRAPHICS_8" value="org.cytoscape.ding.customgraphics.NullCustomGraphics,0,[ Remove Graphics ]," type="string"/>
        <att name="NODE_TRANSPARENCY" value="255" type="string"/>
        <att name="NODE_LABEL_WIDTH" value="200.0" type="string"/>
        <att name="NODE_CUSTOMGRAPHICS_SIZE_1" value="0.0" type="string"/>
        <att name="NODE_CUSTOMGRAPHICS_5" value="org.cytoscape.ding.customgraphics.NullCustomGraphics,0,[ Remove Graphics ]," type="string"/>
        <att name="NODE_CUSTOMGRAPHICS_9" value="org.cytoscape.ding.customgraphics.NullCustomGraphics,0,[ Remove Graphics ]," type="string"/>
        <att name="NODE_CUSTOMGRAPHICS_1" value="org.cytoscape.ding.customgraphics.NullCustomGraphics,0,[ Remove Graphics ]," type="string"/>
        <att name="NODE_CUSTOMGRAPHICS_POSITION_6" value="C,C,c,0.00,0.00" type="string"/>
        <att name="NODE_CUSTOMGRAPHICS_POSITION_2" value="C,C,c,0.00,0.00" type="string"/>
        <att name="NODE_SELECTED_PAINT" value="#FFFF00" type="string"/>
        <att name="NODE_HEIGHT" value="30.0" type="string"/>
        <att name="NODE_CUSTOMGRAPHICS_POSITION_8" value="C,C,c,0.00,0.00" type="string"/>
        <att name="NODE_CUSTOMGRAPHICS_POSITION_9" value="C,C,c,0.00,0.00" type="string"/>
        <att name="NODE_CUSTOMGRAPHICS_POSITION_1" value="C,C,c,0.00,0.00" type="string"/>
        <att name="NODE_BORDER_TRANSPARENCY" value="255" type="string"/>
        <att name="NODE_CUSTOMGRAPHICS_SIZE_3" value="0.0" type="string"/>
        <att name="NODE_CUSTOMGRAPHICS_3" value="org.cytoscape.ding.customgraphics.NullCustomGraphics,0,[ Remove Graphics ]," type="string"/>
        <att name="NODE_CUSTOMGRAPHICS_7" value="org.cytoscape.ding.customgraphics.NullCustomGraphics,0,[ Remove Graphics ]," type="string"/>
        <att name="NODE_CUSTOMGRAPHICS_SIZE_7" value="0.0" type="string"/>
        <att name="NODE_CUSTOMGRAPHICS_SIZE_8" value="0.0" type="string"/>
        <att name="NODE_CUSTOMGRAPHICS_POSITION_5" value="C,C,c,0.00,0.00" type="string"/>
        <att name="NODE_SHAPE" value="ROUND_RECTANGLE" type="string"/>
        <att name="NODE_SELECTED" value="false" type="string"/>
        <att name="NODE_DEPTH" value="0.0" type="string"/>
        <att name="NODE_CUSTOMGRAPHICS_SIZE_5" value="0.0" type="string"/>
        <att name="NODE_FILL_COLOR" value="#C8C8C8" type="string"/>
        <att name="NODE_VISIBLE" value="true" type="string"/>
        <att name="NODE_BORDER_WIDTH" value="0.0" type="string"/>
        <att name="NODE_TOOLTIP" value="" type="string"/>
        <att name="NODE_BORDER_PAINT" value="#006699" type="string"/>
        <att name="NODE_CUSTOMGRAPHICS_6" value="org.cytoscape.ding.customgraphics.NullCustomGraphics,0,[ Remove Graphics ]," type="string"/>
        <att name="NODE_WIDTH" value="80.0" type="string"/>
        <att name="NODE_CUSTOMGRAPHICS_POSITION_3" value="C,C,c,0.00,0.00" type="string"/>
        <att name="NODE_CUSTOMGRAPHICS_4" value="org.cytoscape.ding.customgraphics.NullCustomGraphics,0,[ Remove Graphics ]," type="string"/>
        <att name="NODE_LABEL_POSITION" value="C,C,c,0.00,0.00" type="string"/>
        <att name="NODE_LABEL_TRANSPARENCY" value="255" type="string"/>
        <att name="NODE_CUSTOMGRAPHICS_SIZE_4" value="0.0" type="string"/>
        <att name="NODE_CUSTOMGRAPHICS_2" value="org.cytoscape.ding.customgraphics.NullCustomGraphics,0,[ Remove Graphics ]," type="string"/>
        <att name="NODE_CUSTOMGRAPHICS_POSITION_4" value="C,C,c,0.00,0.00" type="string"/>
        <att name="NODE_LABEL_FONT_FACE" value="Dialog.plain,plain,18" type="string"/>
        <att name="NODE_CUSTOMGRAPHICS_SIZE_9" value="0.0" type="string"/>
        <att name="NODE_LABEL_COLOR" value="#000000" type="string"/>
        <att name="NODE_LABEL_FONT_SIZE" value="18" type="string"/>
        <att name="NODE_LABEL" value="NPEPPSL1" type="string"/>
      </att>
    </graphics>
  </node>
  <node id="2821" label="TAX1BP1" cy:nodeId="2061">
    <graphics y="-54.58851081095666" z="0.0" x="-325.6294250488281">
      <att name="lockedVisualProperties" type="list">
        <att name="NODE_NESTED_NETWORK_IMAGE_VISIBLE" value="true" type="string"/>
        <att name="NODE_CUSTOMGRAPHICS_SIZE_2" value="0.0" type="string"/>
        <att name="NODE_CUSTOMGRAPHICS_SIZE_6" value="0.0" type="string"/>
        <att name="NODE_BORDER_STROKE" value="SOLID" type="string"/>
        <att name="NODE_CUSTOMGRAPHICS_POSITION_7" value="C,C,c,0.00,0.00" type="string"/>
        <att name="NODE_CUSTOMGRAPHICS_8" value="org.cytoscape.ding.customgraphics.NullCustomGraphics,0,[ Remove Graphics ]," type="string"/>
        <att name="NODE_TRANSPARENCY" value="255" type="string"/>
        <att name="NODE_LABEL_WIDTH" value="200.0" type="string"/>
        <att name="NODE_CUSTOMGRAPHICS_SIZE_1" value="0.0" type="string"/>
        <att name="NODE_CUSTOMGRAPHICS_5" value="org.cytoscape.ding.customgraphics.NullCustomGraphics,0,[ Remove Graphics ]," type="string"/>
        <att name="NODE_CUSTOMGRAPHICS_9" value="org.cytoscape.ding.customgraphics.NullCustomGraphics,0,[ Remove Graphics ]," type="string"/>
        <att name="NODE_CUSTOMGRAPHICS_1" value="org.cytoscape.ding.customgraphics.NullCustomGraphics,0,[ Remove Graphics ]," type="string"/>
        <att name="NODE_CUSTOMGRAPHICS_POSITION_6" value="C,C,c,0.00,0.00" type="string"/>
        <att name="NODE_CUSTOMGRAPHICS_POSITION_2" value="C,C,c,0.00,0.00" type="string"/>
        <att name="NODE_SELECTED_PAINT" value="#FFFF00" type="string"/>
        <att name="NODE_HEIGHT" value="30.0" type="string"/>
        <att name="NODE_CUSTOMGRAPHICS_POSITION_8" value="C,C,c,0.00,0.00" type="string"/>
        <att name="NODE_CUSTOMGRAPHICS_POSITION_9" value="C,C,c,0.00,0.00" type="string"/>
        <att name="NODE_CUSTOMGRAPHICS_POSITION_1" value="C,C,c,0.00,0.00" type="string"/>
        <att name="NODE_BORDER_TRANSPARENCY" value="255" type="string"/>
        <att name="NODE_CUSTOMGRAPHICS_SIZE_3" value="0.0" type="string"/>
        <att name="NODE_CUSTOMGRAPHICS_3" value="org.cytoscape.ding.customgraphics.NullCustomGraphics,0,[ Remove Graphics ]," type="string"/>
        <att name="NODE_CUSTOMGRAPHICS_7" value="org.cytoscape.ding.customgraphics.NullCustomGraphics,0,[ Remove Graphics ]," type="string"/>
        <att name="NODE_CUSTOMGRAPHICS_SIZE_7" value="0.0" type="string"/>
        <att name="NODE_CUSTOMGRAPHICS_SIZE_8" value="0.0" type="string"/>
        <att name="NODE_CUSTOMGRAPHICS_POSITION_5" value="C,C,c,0.00,0.00" type="string"/>
        <att name="NODE_SHAPE" value="ROUND_RECTANGLE" type="string"/>
        <att name="NODE_SELECTED" value="false" type="string"/>
        <att name="NODE_DEPTH" value="0.0" type="string"/>
        <att name="NODE_CUSTOMGRAPHICS_SIZE_5" value="0.0" type="string"/>
        <att name="NODE_FILL_COLOR" value="#FF9F1C" type="string"/>
        <att name="NODE_VISIBLE" value="true" type="string"/>
        <att name="NODE_BORDER_WIDTH" value="0.0" type="string"/>
        <att name="NODE_TOOLTIP" value="" type="string"/>
        <att name="NODE_BORDER_PAINT" value="#006699" type="string"/>
        <att name="NODE_CUSTOMGRAPHICS_6" value="org.cytoscape.ding.customgraphics.NullCustomGraphics,0,[ Remove Graphics ]," type="string"/>
        <att name="NODE_WIDTH" value="80.0" type="string"/>
        <att name="NODE_CUSTOMGRAPHICS_POSITION_3" value="C,C,c,0.00,0.00" type="string"/>
        <att name="NODE_CUSTOMGRAPHICS_4" value="org.cytoscape.ding.customgraphics.NullCustomGraphics,0,[ Remove Graphics ]," type="string"/>
        <att name="NODE_LABEL_POSITION" value="C,C,c,0.00,0.00" type="string"/>
        <att name="NODE_LABEL_TRANSPARENCY" value="255" type="string"/>
        <att name="NODE_CUSTOMGRAPHICS_SIZE_4" value="0.0" type="string"/>
        <att name="NODE_CUSTOMGRAPHICS_2" value="org.cytoscape.ding.customgraphics.NullCustomGraphics,0,[ Remove Graphics ]," type="string"/>
        <att name="NODE_CUSTOMGRAPHICS_POSITION_4" value="C,C,c,0.00,0.00" type="string"/>
        <att name="NODE_LABEL_FONT_FACE" value="Dialog.plain,plain,18" type="string"/>
        <att name="NODE_CUSTOMGRAPHICS_SIZE_9" value="0.0" type="string"/>
        <att name="NODE_LABEL_COLOR" value="#000000" type="string"/>
        <att name="NODE_LABEL_FONT_SIZE" value="18" type="string"/>
        <att name="NODE_LABEL" value="TAX1BP1" type="string"/>
      </att>
    </graphics>
  </node>
  <node id="2820" label="JCHAIN" cy:nodeId="2062">
    <graphics y="-938.2202474718666" z="0.0" x="-1408.9735107421875">
      <att name="lockedVisualProperties" type="list">
        <att name="NODE_NESTED_NETWORK_IMAGE_VISIBLE" value="true" type="string"/>
        <att name="NODE_CUSTOMGRAPHICS_SIZE_2" value="0.0" type="string"/>
        <att name="NODE_CUSTOMGRAPHICS_SIZE_6" value="0.0" type="string"/>
        <att name="NODE_BORDER_STROKE" value="SOLID" type="string"/>
        <att name="NODE_CUSTOMGRAPHICS_POSITION_7" value="C,C,c,0.00,0.00" type="string"/>
        <att name="NODE_CUSTOMGRAPHICS_8" value="org.cytoscape.ding.customgraphics.NullCustomGraphics,0,[ Remove Graphics ]," type="string"/>
        <att name="NODE_TRANSPARENCY" value="255" type="string"/>
        <att name="NODE_LABEL_WIDTH" value="200.0" type="string"/>
        <att name="NODE_CUSTOMGRAPHICS_SIZE_1" value="0.0" type="string"/>
        <att name="NODE_CUSTOMGRAPHICS_5" value="org.cytoscape.ding.customgraphics.NullCustomGraphics,0,[ Remove Graphics ]," type="string"/>
        <att name="NODE_CUSTOMGRAPHICS_9" value="org.cytoscape.ding.customgraphics.NullCustomGraphics,0,[ Remove Graphics ]," type="string"/>
        <att name="NODE_CUSTOMGRAPHICS_1" value="org.cytoscape.ding.customgraphics.NullCustomGraphics,0,[ Remove Graphics ]," type="string"/>
        <att name="NODE_CUSTOMGRAPHICS_POSITION_6" value="C,C,c,0.00,0.00" type="string"/>
        <att name="NODE_CUSTOMGRAPHICS_POSITION_2" value="C,C,c,0.00,0.00" type="string"/>
        <att name="NODE_SELECTED_PAINT" value="#FFFF00" type="string"/>
        <att name="NODE_HEIGHT" value="30.0" type="string"/>
        <att name="NODE_CUSTOMGRAPHICS_POSITION_8" value="C,C,c,0.00,0.00" type="string"/>
        <att name="NODE_CUSTOMGRAPHICS_POSITION_9" value="C,C,c,0.00,0.00" type="string"/>
        <att name="NODE_CUSTOMGRAPHICS_POSITION_1" value="C,C,c,0.00,0.00" type="string"/>
        <att name="NODE_BORDER_TRANSPARENCY" value="255" type="string"/>
        <att name="NODE_CUSTOMGRAPHICS_SIZE_3" value="0.0" type="string"/>
        <att name="NODE_CUSTOMGRAPHICS_3" value="org.cytoscape.ding.customgraphics.NullCustomGraphics,0,[ Remove Graphics ]," type="string"/>
        <att name="NODE_CUSTOMGRAPHICS_7" value="org.cytoscape.ding.customgraphics.NullCustomGraphics,0,[ Remove Graphics ]," type="string"/>
        <att name="NODE_CUSTOMGRAPHICS_SIZE_7" value="0.0" type="string"/>
        <att name="NODE_CUSTOMGRAPHICS_SIZE_8" value="0.0" type="string"/>
        <att name="NODE_CUSTOMGRAPHICS_POSITION_5" value="C,C,c,0.00,0.00" type="string"/>
        <att name="NODE_SHAPE" value="ROUND_RECTANGLE" type="string"/>
        <att name="NODE_SELECTED" value="false" type="string"/>
        <att name="NODE_DEPTH" value="0.0" type="string"/>
        <att name="NODE_CUSTOMGRAPHICS_SIZE_5" value="0.0" type="string"/>
        <att name="NODE_FILL_COLOR" value="#C8C8C8" type="string"/>
        <att name="NODE_VISIBLE" value="true" type="string"/>
        <att name="NODE_BORDER_WIDTH" value="0.0" type="string"/>
        <att name="NODE_TOOLTIP" value="" type="string"/>
        <att name="NODE_BORDER_PAINT" value="#006699" type="string"/>
        <att name="NODE_CUSTOMGRAPHICS_6" value="org.cytoscape.ding.customgraphics.NullCustomGraphics,0,[ Remove Graphics ]," type="string"/>
        <att name="NODE_WIDTH" value="80.0" type="string"/>
        <att name="NODE_CUSTOMGRAPHICS_POSITION_3" value="C,C,c,0.00,0.00" type="string"/>
        <att name="NODE_CUSTOMGRAPHICS_4" value="org.cytoscape.ding.customgraphics.NullCustomGraphics,0,[ Remove Graphics ]," type="string"/>
        <att name="NODE_LABEL_POSITION" value="C,C,c,0.00,0.00" type="string"/>
        <att name="NODE_LABEL_TRANSPARENCY" value="255" type="string"/>
        <att name="NODE_CUSTOMGRAPHICS_SIZE_4" value="0.0" type="string"/>
        <att name="NODE_CUSTOMGRAPHICS_2" value="org.cytoscape.ding.customgraphics.NullCustomGraphics,0,[ Remove Graphics ]," type="string"/>
        <att name="NODE_CUSTOMGRAPHICS_POSITION_4" value="C,C,c,0.00,0.00" type="string"/>
        <att name="NODE_LABEL_FONT_FACE" value="Dialog.plain,plain,18" type="string"/>
        <att name="NODE_CUSTOMGRAPHICS_SIZE_9" value="0.0" type="string"/>
        <att name="NODE_LABEL_COLOR" value="#000000" type="string"/>
        <att name="NODE_LABEL_FONT_SIZE" value="18" type="string"/>
        <att name="NODE_LABEL" value="JCHAIN" type="string"/>
      </att>
    </graphics>
  </node>
  <node id="2819" label="OIT3" cy:nodeId="2063">
    <graphics y="-849.1773397570229" z="0.0" x="-1235.3681640625">
      <att name="lockedVisualProperties" type="list">
        <att name="NODE_NESTED_NETWORK_IMAGE_VISIBLE" value="true" type="string"/>
        <att name="NODE_CUSTOMGRAPHICS_SIZE_2" value="0.0" type="string"/>
        <att name="NODE_CUSTOMGRAPHICS_SIZE_6" value="0.0" type="string"/>
        <att name="NODE_BORDER_STROKE" value="SOLID" type="string"/>
        <att name="NODE_CUSTOMGRAPHICS_POSITION_7" value="C,C,c,0.00,0.00" type="string"/>
        <att name="NODE_CUSTOMGRAPHICS_8" value="org.cytoscape.ding.customgraphics.NullCustomGraphics,0,[ Remove Graphics ]," type="string"/>
        <att name="NODE_TRANSPARENCY" value="255" type="string"/>
        <att name="NODE_LABEL_WIDTH" value="200.0" type="string"/>
        <att name="NODE_CUSTOMGRAPHICS_SIZE_1" value="0.0" type="string"/>
        <att name="NODE_CUSTOMGRAPHICS_5" value="org.cytoscape.ding.customgraphics.NullCustomGraphics,0,[ Remove Graphics ]," type="string"/>
        <att name="NODE_CUSTOMGRAPHICS_9" value="org.cytoscape.ding.customgraphics.NullCustomGraphics,0,[ Remove Graphics ]," type="string"/>
        <att name="NODE_CUSTOMGRAPHICS_1" value="org.cytoscape.ding.customgraphics.NullCustomGraphics,0,[ Remove Graphics ]," type="string"/>
        <att name="NODE_CUSTOMGRAPHICS_POSITION_6" value="C,C,c,0.00,0.00" type="string"/>
        <att name="NODE_CUSTOMGRAPHICS_POSITION_2" value="C,C,c,0.00,0.00" type="string"/>
        <att name="NODE_SELECTED_PAINT" value="#FFFF00" type="string"/>
        <att name="NODE_HEIGHT" value="30.0" type="string"/>
        <att name="NODE_CUSTOMGRAPHICS_POSITION_8" value="C,C,c,0.00,0.00" type="string"/>
        <att name="NODE_CUSTOMGRAPHICS_POSITION_9" value="C,C,c,0.00,0.00" type="string"/>
        <att name="NODE_CUSTOMGRAPHICS_POSITION_1" value="C,C,c,0.00,0.00" type="string"/>
        <att name="NODE_BORDER_TRANSPARENCY" value="255" type="string"/>
        <att name="NODE_CUSTOMGRAPHICS_SIZE_3" value="0.0" type="string"/>
        <att name="NODE_CUSTOMGRAPHICS_3" value="org.cytoscape.ding.customgraphics.NullCustomGraphics,0,[ Remove Graphics ]," type="string"/>
        <att name="NODE_CUSTOMGRAPHICS_7" value="org.cytoscape.ding.customgraphics.NullCustomGraphics,0,[ Remove Graphics ]," type="string"/>
        <att name="NODE_CUSTOMGRAPHICS_SIZE_7" value="0.0" type="string"/>
        <att name="NODE_CUSTOMGRAPHICS_SIZE_8" value="0.0" type="string"/>
        <att name="NODE_CUSTOMGRAPHICS_POSITION_5" value="C,C,c,0.00,0.00" type="string"/>
        <att name="NODE_SHAPE" value="ROUND_RECTANGLE" type="string"/>
        <att name="NODE_SELECTED" value="false" type="string"/>
        <att name="NODE_DEPTH" value="0.0" type="string"/>
        <att name="NODE_CUSTOMGRAPHICS_SIZE_5" value="0.0" type="string"/>
        <att name="NODE_FILL_COLOR" value="#C8C8C8" type="string"/>
        <att name="NODE_VISIBLE" value="true" type="string"/>
        <att name="NODE_BORDER_WIDTH" value="0.0" type="string"/>
        <att name="NODE_TOOLTIP" value="" type="string"/>
        <att name="NODE_BORDER_PAINT" value="#006699" type="string"/>
        <att name="NODE_CUSTOMGRAPHICS_6" value="org.cytoscape.ding.customgraphics.NullCustomGraphics,0,[ Remove Graphics ]," type="string"/>
        <att name="NODE_WIDTH" value="80.0" type="string"/>
        <att name="NODE_CUSTOMGRAPHICS_POSITION_3" value="C,C,c,0.00,0.00" type="string"/>
        <att name="NODE_CUSTOMGRAPHICS_4" value="org.cytoscape.ding.customgraphics.NullCustomGraphics,0,[ Remove Graphics ]," type="string"/>
        <att name="NODE_LABEL_POSITION" value="C,C,c,0.00,0.00" type="string"/>
        <att name="NODE_LABEL_TRANSPARENCY" value="255" type="string"/>
        <att name="NODE_CUSTOMGRAPHICS_SIZE_4" value="0.0" type="string"/>
        <att name="NODE_CUSTOMGRAPHICS_2" value="org.cytoscape.ding.customgraphics.NullCustomGraphics,0,[ Remove Graphics ]," type="string"/>
        <att name="NODE_CUSTOMGRAPHICS_POSITION_4" value="C,C,c,0.00,0.00" type="string"/>
        <att name="NODE_LABEL_FONT_FACE" value="Dialog.plain,plain,18" type="string"/>
        <att name="NODE_CUSTOMGRAPHICS_SIZE_9" value="0.0" type="string"/>
        <att name="NODE_LABEL_COLOR" value="#000000" type="string"/>
        <att name="NODE_LABEL_FONT_SIZE" value="18" type="string"/>
        <att name="NODE_LABEL" value="OIT3" type="string"/>
      </att>
    </graphics>
  </node>
  <node id="2818" label="MBTPS1" cy:nodeId="2064">
    <graphics y="-734.2297973632812" z="0.0" x="-1419.6741943359375">
      <att name="lockedVisualProperties" type="list">
        <att name="NODE_NESTED_NETWORK_IMAGE_VISIBLE" value="true" type="string"/>
        <att name="NODE_CUSTOMGRAPHICS_SIZE_2" value="0.0" type="string"/>
        <att name="NODE_CUSTOMGRAPHICS_SIZE_6" value="0.0" type="string"/>
        <att name="NODE_BORDER_STROKE" value="SOLID" type="string"/>
        <att name="NODE_CUSTOMGRAPHICS_POSITION_7" value="C,C,c,0.00,0.00" type="string"/>
        <att name="NODE_CUSTOMGRAPHICS_8" value="org.cytoscape.ding.customgraphics.NullCustomGraphics,0,[ Remove Graphics ]," type="string"/>
        <att name="NODE_TRANSPARENCY" value="255" type="string"/>
        <att name="NODE_LABEL_WIDTH" value="200.0" type="string"/>
        <att name="NODE_CUSTOMGRAPHICS_SIZE_1" value="0.0" type="string"/>
        <att name="NODE_CUSTOMGRAPHICS_5" value="org.cytoscape.ding.customgraphics.NullCustomGraphics,0,[ Remove Graphics ]," type="string"/>
        <att name="NODE_CUSTOMGRAPHICS_9" value="org.cytoscape.ding.customgraphics.NullCustomGraphics,0,[ Remove Graphics ]," type="string"/>
        <att name="NODE_CUSTOMGRAPHICS_1" value="org.cytoscape.ding.customgraphics.NullCustomGraphics,0,[ Remove Graphics ]," type="string"/>
        <att name="NODE_CUSTOMGRAPHICS_POSITION_6" value="C,C,c,0.00,0.00" type="string"/>
        <att name="NODE_CUSTOMGRAPHICS_POSITION_2" value="C,C,c,0.00,0.00" type="string"/>
        <att name="NODE_SELECTED_PAINT" value="#FFFF00" type="string"/>
        <att name="NODE_HEIGHT" value="30.0" type="string"/>
        <att name="NODE_CUSTOMGRAPHICS_POSITION_8" value="C,C,c,0.00,0.00" type="string"/>
        <att name="NODE_CUSTOMGRAPHICS_POSITION_9" value="C,C,c,0.00,0.00" type="string"/>
        <att name="NODE_CUSTOMGRAPHICS_POSITION_1" value="C,C,c,0.00,0.00" type="string"/>
        <att name="NODE_BORDER_TRANSPARENCY" value="255" type="string"/>
        <att name="NODE_CUSTOMGRAPHICS_SIZE_3" value="0.0" type="string"/>
        <att name="NODE_CUSTOMGRAPHICS_3" value="org.cytoscape.ding.customgraphics.NullCustomGraphics,0,[ Remove Graphics ]," type="string"/>
        <att name="NODE_CUSTOMGRAPHICS_7" value="org.cytoscape.ding.customgraphics.NullCustomGraphics,0,[ Remove Graphics ]," type="string"/>
        <att name="NODE_CUSTOMGRAPHICS_SIZE_7" value="0.0" type="string"/>
        <att name="NODE_CUSTOMGRAPHICS_SIZE_8" value="0.0" type="string"/>
        <att name="NODE_CUSTOMGRAPHICS_POSITION_5" value="C,C,c,0.00,0.00" type="string"/>
        <att name="NODE_SHAPE" value="ROUND_RECTANGLE" type="string"/>
        <att name="NODE_SELECTED" value="false" type="string"/>
        <att name="NODE_DEPTH" value="0.0" type="string"/>
        <att name="NODE_CUSTOMGRAPHICS_SIZE_5" value="0.0" type="string"/>
        <att name="NODE_FILL_COLOR" value="#C8C8C8" type="string"/>
        <att name="NODE_VISIBLE" value="true" type="string"/>
        <att name="NODE_BORDER_WIDTH" value="0.0" type="string"/>
        <att name="NODE_TOOLTIP" value="" type="string"/>
        <att name="NODE_BORDER_PAINT" value="#006699" type="string"/>
        <att name="NODE_CUSTOMGRAPHICS_6" value="org.cytoscape.ding.customgraphics.NullCustomGraphics,0,[ Remove Graphics ]," type="string"/>
        <att name="NODE_WIDTH" value="80.0" type="string"/>
        <att name="NODE_CUSTOMGRAPHICS_POSITION_3" value="C,C,c,0.00,0.00" type="string"/>
        <att name="NODE_CUSTOMGRAPHICS_4" value="org.cytoscape.ding.customgraphics.NullCustomGraphics,0,[ Remove Graphics ]," type="string"/>
        <att name="NODE_LABEL_POSITION" value="C,C,c,0.00,0.00" type="string"/>
        <att name="NODE_LABEL_TRANSPARENCY" value="255" type="string"/>
        <att name="NODE_CUSTOMGRAPHICS_SIZE_4" value="0.0" type="string"/>
        <att name="NODE_CUSTOMGRAPHICS_2" value="org.cytoscape.ding.customgraphics.NullCustomGraphics,0,[ Remove Graphics ]," type="string"/>
        <att name="NODE_CUSTOMGRAPHICS_POSITION_4" value="C,C,c,0.00,0.00" type="string"/>
        <att name="NODE_LABEL_FONT_FACE" value="Dialog.plain,plain,18" type="string"/>
        <att name="NODE_CUSTOMGRAPHICS_SIZE_9" value="0.0" type="string"/>
        <att name="NODE_LABEL_COLOR" value="#000000" type="string"/>
        <att name="NODE_LABEL_FONT_SIZE" value="18" type="string"/>
        <att name="NODE_LABEL" value="MBTPS1" type="string"/>
      </att>
    </graphics>
  </node>
  <node id="2817" label="HBE1" cy:nodeId="2065">
    <graphics y="-517.3648362760059" z="0.0" x="1050.111083984375">
      <att name="lockedVisualProperties" type="list">
        <att name="NODE_NESTED_NETWORK_IMAGE_VISIBLE" value="true" type="string"/>
        <att name="NODE_CUSTOMGRAPHICS_SIZE_2" value="0.0" type="string"/>
        <att name="NODE_CUSTOMGRAPHICS_SIZE_6" value="0.0" type="string"/>
        <att name="NODE_BORDER_STROKE" value="SOLID" type="string"/>
        <att name="NODE_CUSTOMGRAPHICS_POSITION_7" value="C,C,c,0.00,0.00" type="string"/>
        <att name="NODE_CUSTOMGRAPHICS_8" value="org.cytoscape.ding.customgraphics.NullCustomGraphics,0,[ Remove Graphics ]," type="string"/>
        <att name="NODE_TRANSPARENCY" value="255" type="string"/>
        <att name="NODE_LABEL_WIDTH" value="200.0" type="string"/>
        <att name="NODE_CUSTOMGRAPHICS_SIZE_1" value="0.0" type="string"/>
        <att name="NODE_CUSTOMGRAPHICS_5" value="org.cytoscape.ding.customgraphics.NullCustomGraphics,0,[ Remove Graphics ]," type="string"/>
        <att name="NODE_CUSTOMGRAPHICS_9" value="org.cytoscape.ding.customgraphics.NullCustomGraphics,0,[ Remove Graphics ]," type="string"/>
        <att name="NODE_CUSTOMGRAPHICS_1" value="org.cytoscape.ding.customgraphics.NullCustomGraphics,0,[ Remove Graphics ]," type="string"/>
        <att name="NODE_CUSTOMGRAPHICS_POSITION_6" value="C,C,c,0.00,0.00" type="string"/>
        <att name="NODE_CUSTOMGRAPHICS_POSITION_2" value="C,C,c,0.00,0.00" type="string"/>
        <att name="NODE_SELECTED_PAINT" value="#FFFF00" type="string"/>
        <att name="NODE_HEIGHT" value="30.0" type="string"/>
        <att name="NODE_CUSTOMGRAPHICS_POSITION_8" value="C,C,c,0.00,0.00" type="string"/>
        <att name="NODE_CUSTOMGRAPHICS_POSITION_9" value="C,C,c,0.00,0.00" type="string"/>
        <att name="NODE_CUSTOMGRAPHICS_POSITION_1" value="C,C,c,0.00,0.00" type="string"/>
        <att name="NODE_BORDER_TRANSPARENCY" value="255" type="string"/>
        <att name="NODE_CUSTOMGRAPHICS_SIZE_3" value="0.0" type="string"/>
        <att name="NODE_CUSTOMGRAPHICS_3" value="org.cytoscape.ding.customgraphics.NullCustomGraphics,0,[ Remove Graphics ]," type="string"/>
        <att name="NODE_CUSTOMGRAPHICS_7" value="org.cytoscape.ding.customgraphics.NullCustomGraphics,0,[ Remove Graphics ]," type="string"/>
        <att name="NODE_CUSTOMGRAPHICS_SIZE_7" value="0.0" type="string"/>
        <att name="NODE_CUSTOMGRAPHICS_SIZE_8" value="0.0" type="string"/>
        <att name="NODE_CUSTOMGRAPHICS_POSITION_5" value="C,C,c,0.00,0.00" type="string"/>
        <att name="NODE_SHAPE" value="ROUND_RECTANGLE" type="string"/>
        <att name="NODE_SELECTED" value="false" type="string"/>
        <att name="NODE_DEPTH" value="0.0" type="string"/>
        <att name="NODE_CUSTOMGRAPHICS_SIZE_5" value="0.0" type="string"/>
        <att name="NODE_FILL_COLOR" value="#C8C8C8" type="string"/>
        <att name="NODE_VISIBLE" value="true" type="string"/>
        <att name="NODE_BORDER_WIDTH" value="0.0" type="string"/>
        <att name="NODE_TOOLTIP" value="" type="string"/>
        <att name="NODE_BORDER_PAINT" value="#006699" type="string"/>
        <att name="NODE_CUSTOMGRAPHICS_6" value="org.cytoscape.ding.customgraphics.NullCustomGraphics,0,[ Remove Graphics ]," type="string"/>
        <att name="NODE_WIDTH" value="80.0" type="string"/>
        <att name="NODE_CUSTOMGRAPHICS_POSITION_3" value="C,C,c,0.00,0.00" type="string"/>
        <att name="NODE_CUSTOMGRAPHICS_4" value="org.cytoscape.ding.customgraphics.NullCustomGraphics,0,[ Remove Graphics ]," type="string"/>
        <att name="NODE_LABEL_POSITION" value="C,C,c,0.00,0.00" type="string"/>
        <att name="NODE_LABEL_TRANSPARENCY" value="255" type="string"/>
        <att name="NODE_CUSTOMGRAPHICS_SIZE_4" value="0.0" type="string"/>
        <att name="NODE_CUSTOMGRAPHICS_2" value="org.cytoscape.ding.customgraphics.NullCustomGraphics,0,[ Remove Graphics ]," type="string"/>
        <att name="NODE_CUSTOMGRAPHICS_POSITION_4" value="C,C,c,0.00,0.00" type="string"/>
        <att name="NODE_LABEL_FONT_FACE" value="Dialog.plain,plain,18" type="string"/>
        <att name="NODE_CUSTOMGRAPHICS_SIZE_9" value="0.0" type="string"/>
        <att name="NODE_LABEL_COLOR" value="#000000" type="string"/>
        <att name="NODE_LABEL_FONT_SIZE" value="18" type="string"/>
        <att name="NODE_LABEL" value="HBE1" type="string"/>
      </att>
    </graphics>
  </node>
  <node id="2816" label="RAB11B" cy:nodeId="2066">
    <graphics y="-895.0714437609291" z="0.0" x="-1041.4306640625">
      <att name="lockedVisualProperties" type="list">
        <att name="NODE_NESTED_NETWORK_IMAGE_VISIBLE" value="true" type="string"/>
        <att name="NODE_CUSTOMGRAPHICS_SIZE_2" value="0.0" type="string"/>
        <att name="NODE_CUSTOMGRAPHICS_SIZE_6" value="0.0" type="string"/>
        <att name="NODE_BORDER_STROKE" value="SOLID" type="string"/>
        <att name="NODE_CUSTOMGRAPHICS_POSITION_7" value="C,C,c,0.00,0.00" type="string"/>
        <att name="NODE_CUSTOMGRAPHICS_8" value="org.cytoscape.ding.customgraphics.NullCustomGraphics,0,[ Remove Graphics ]," type="string"/>
        <att name="NODE_TRANSPARENCY" value="255" type="string"/>
        <att name="NODE_LABEL_WIDTH" value="200.0" type="string"/>
        <att name="NODE_CUSTOMGRAPHICS_SIZE_1" value="0.0" type="string"/>
        <att name="NODE_CUSTOMGRAPHICS_5" value="org.cytoscape.ding.customgraphics.NullCustomGraphics,0,[ Remove Graphics ]," type="string"/>
        <att name="NODE_CUSTOMGRAPHICS_9" value="org.cytoscape.ding.customgraphics.NullCustomGraphics,0,[ Remove Graphics ]," type="string"/>
        <att name="NODE_CUSTOMGRAPHICS_1" value="org.cytoscape.ding.customgraphics.NullCustomGraphics,0,[ Remove Graphics ]," type="string"/>
        <att name="NODE_CUSTOMGRAPHICS_POSITION_6" value="C,C,c,0.00,0.00" type="string"/>
        <att name="NODE_CUSTOMGRAPHICS_POSITION_2" value="C,C,c,0.00,0.00" type="string"/>
        <att name="NODE_SELECTED_PAINT" value="#FFFF00" type="string"/>
        <att name="NODE_HEIGHT" value="30.0" type="string"/>
        <att name="NODE_CUSTOMGRAPHICS_POSITION_8" value="C,C,c,0.00,0.00" type="string"/>
        <att name="NODE_CUSTOMGRAPHICS_POSITION_9" value="C,C,c,0.00,0.00" type="string"/>
        <att name="NODE_CUSTOMGRAPHICS_POSITION_1" value="C,C,c,0.00,0.00" type="string"/>
        <att name="NODE_BORDER_TRANSPARENCY" value="255" type="string"/>
        <att name="NODE_CUSTOMGRAPHICS_SIZE_3" value="0.0" type="string"/>
        <att name="NODE_CUSTOMGRAPHICS_3" value="org.cytoscape.ding.customgraphics.NullCustomGraphics,0,[ Remove Graphics ]," type="string"/>
        <att name="NODE_CUSTOMGRAPHICS_7" value="org.cytoscape.ding.customgraphics.NullCustomGraphics,0,[ Remove Graphics ]," type="string"/>
        <att name="NODE_CUSTOMGRAPHICS_SIZE_7" value="0.0" type="string"/>
        <att name="NODE_CUSTOMGRAPHICS_SIZE_8" value="0.0" type="string"/>
        <att name="NODE_CUSTOMGRAPHICS_POSITION_5" value="C,C,c,0.00,0.00" type="string"/>
        <att name="NODE_SHAPE" value="ROUND_RECTANGLE" type="string"/>
        <att name="NODE_SELECTED" value="false" type="string"/>
        <att name="NODE_DEPTH" value="0.0" type="string"/>
        <att name="NODE_CUSTOMGRAPHICS_SIZE_5" value="0.0" type="string"/>
        <att name="NODE_FILL_COLOR" value="#C8C8C8" type="string"/>
        <att name="NODE_VISIBLE" value="true" type="string"/>
        <att name="NODE_BORDER_WIDTH" value="0.0" type="string"/>
        <att name="NODE_TOOLTIP" value="" type="string"/>
        <att name="NODE_BORDER_PAINT" value="#006699" type="string"/>
        <att name="NODE_CUSTOMGRAPHICS_6" value="org.cytoscape.ding.customgraphics.NullCustomGraphics,0,[ Remove Graphics ]," type="string"/>
        <att name="NODE_WIDTH" value="80.0" type="string"/>
        <att name="NODE_CUSTOMGRAPHICS_POSITION_3" value="C,C,c,0.00,0.00" type="string"/>
        <att name="NODE_CUSTOMGRAPHICS_4" value="org.cytoscape.ding.customgraphics.NullCustomGraphics,0,[ Remove Graphics ]," type="string"/>
        <att name="NODE_LABEL_POSITION" value="C,C,c,0.00,0.00" type="string"/>
        <att name="NODE_LABEL_TRANSPARENCY" value="255" type="string"/>
        <att name="NODE_CUSTOMGRAPHICS_SIZE_4" value="0.0" type="string"/>
        <att name="NODE_CUSTOMGRAPHICS_2" value="org.cytoscape.ding.customgraphics.NullCustomGraphics,0,[ Remove Graphics ]," type="string"/>
        <att name="NODE_CUSTOMGRAPHICS_POSITION_4" value="C,C,c,0.00,0.00" type="string"/>
        <att name="NODE_LABEL_FONT_FACE" value="Dialog.plain,plain,18" type="string"/>
        <att name="NODE_CUSTOMGRAPHICS_SIZE_9" value="0.0" type="string"/>
        <att name="NODE_LABEL_COLOR" value="#000000" type="string"/>
        <att name="NODE_LABEL_FONT_SIZE" value="18" type="string"/>
        <att name="NODE_LABEL" value="RAB11B" type="string"/>
      </att>
    </graphics>
  </node>
  <node id="2815" label="CEP164" cy:nodeId="2067">
    <graphics y="205.31958254925047" z="0.0" x="-1093.2556585396167">
      <att name="lockedVisualProperties" type="list">
        <att name="NODE_NESTED_NETWORK_IMAGE_VISIBLE" value="true" type="string"/>
        <att name="NODE_CUSTOMGRAPHICS_SIZE_2" value="0.0" type="string"/>
        <att name="NODE_CUSTOMGRAPHICS_SIZE_6" value="0.0" type="string"/>
        <att name="NODE_BORDER_STROKE" value="SOLID" type="string"/>
        <att name="NODE_CUSTOMGRAPHICS_POSITION_7" value="C,C,c,0.00,0.00" type="string"/>
        <att name="NODE_CUSTOMGRAPHICS_8" value="org.cytoscape.ding.customgraphics.NullCustomGraphics,0,[ Remove Graphics ]," type="string"/>
        <att name="NODE_TRANSPARENCY" value="255" type="string"/>
        <att name="NODE_LABEL_WIDTH" value="200.0" type="string"/>
        <att name="NODE_CUSTOMGRAPHICS_SIZE_1" value="0.0" type="string"/>
        <att name="NODE_CUSTOMGRAPHICS_5" value="org.cytoscape.ding.customgraphics.NullCustomGraphics,0,[ Remove Graphics ]," type="string"/>
        <att name="NODE_CUSTOMGRAPHICS_9" value="org.cytoscape.ding.customgraphics.NullCustomGraphics,0,[ Remove Graphics ]," type="string"/>
        <att name="NODE_CUSTOMGRAPHICS_1" value="org.cytoscape.ding.customgraphics.NullCustomGraphics,0,[ Remove Graphics ]," type="string"/>
        <att name="NODE_CUSTOMGRAPHICS_POSITION_6" value="C,C,c,0.00,0.00" type="string"/>
        <att name="NODE_CUSTOMGRAPHICS_POSITION_2" value="C,C,c,0.00,0.00" type="string"/>
        <att name="NODE_SELECTED_PAINT" value="#FFFF00" type="string"/>
        <att name="NODE_HEIGHT" value="30.0" type="string"/>
        <att name="NODE_CUSTOMGRAPHICS_POSITION_8" value="C,C,c,0.00,0.00" type="string"/>
        <att name="NODE_CUSTOMGRAPHICS_POSITION_9" value="C,C,c,0.00,0.00" type="string"/>
        <att name="NODE_CUSTOMGRAPHICS_POSITION_1" value="C,C,c,0.00,0.00" type="string"/>
        <att name="NODE_BORDER_TRANSPARENCY" value="255" type="string"/>
        <att name="NODE_CUSTOMGRAPHICS_SIZE_3" value="0.0" type="string"/>
        <att name="NODE_CUSTOMGRAPHICS_3" value="org.cytoscape.ding.customgraphics.NullCustomGraphics,0,[ Remove Graphics ]," type="string"/>
        <att name="NODE_CUSTOMGRAPHICS_7" value="org.cytoscape.ding.customgraphics.NullCustomGraphics,0,[ Remove Graphics ]," type="string"/>
        <att name="NODE_CUSTOMGRAPHICS_SIZE_7" value="0.0" type="string"/>
        <att name="NODE_CUSTOMGRAPHICS_SIZE_8" value="0.0" type="string"/>
        <att name="NODE_CUSTOMGRAPHICS_POSITION_5" value="C,C,c,0.00,0.00" type="string"/>
        <att name="NODE_SHAPE" value="ROUND_RECTANGLE" type="string"/>
        <att name="NODE_SELECTED" value="false" type="string"/>
        <att name="NODE_DEPTH" value="0.0" type="string"/>
        <att name="NODE_CUSTOMGRAPHICS_SIZE_5" value="0.0" type="string"/>
        <att name="NODE_FILL_COLOR" value="#C8C8C8" type="string"/>
        <att name="NODE_VISIBLE" value="true" type="string"/>
        <att name="NODE_BORDER_WIDTH" value="0.0" type="string"/>
        <att name="NODE_TOOLTIP" value="" type="string"/>
        <att name="NODE_BORDER_PAINT" value="#006699" type="string"/>
        <att name="NODE_CUSTOMGRAPHICS_6" value="org.cytoscape.ding.customgraphics.NullCustomGraphics,0,[ Remove Graphics ]," type="string"/>
        <att name="NODE_WIDTH" value="80.0" type="string"/>
        <att name="NODE_CUSTOMGRAPHICS_POSITION_3" value="C,C,c,0.00,0.00" type="string"/>
        <att name="NODE_CUSTOMGRAPHICS_4" value="org.cytoscape.ding.customgraphics.NullCustomGraphics,0,[ Remove Graphics ]," type="string"/>
        <att name="NODE_LABEL_POSITION" value="C,C,c,0.00,0.00" type="string"/>
        <att name="NODE_LABEL_TRANSPARENCY" value="255" type="string"/>
        <att name="NODE_CUSTOMGRAPHICS_SIZE_4" value="0.0" type="string"/>
        <att name="NODE_CUSTOMGRAPHICS_2" value="org.cytoscape.ding.customgraphics.NullCustomGraphics,0,[ Remove Graphics ]," type="string"/>
        <att name="NODE_CUSTOMGRAPHICS_POSITION_4" value="C,C,c,0.00,0.00" type="string"/>
        <att name="NODE_LABEL_FONT_FACE" value="Dialog.plain,plain,18" type="string"/>
        <att name="NODE_CUSTOMGRAPHICS_SIZE_9" value="0.0" type="string"/>
        <att name="NODE_LABEL_COLOR" value="#000000" type="string"/>
        <att name="NODE_LABEL_FONT_SIZE" value="18" type="string"/>
        <att name="NODE_LABEL" value="CEP164" type="string"/>
      </att>
    </graphics>
  </node>
  <node id="2814" label="DYNC2H1" cy:nodeId="2068">
    <graphics y="-822.0034505968666" z="0.0" x="-1688.8270263671875">
      <att name="lockedVisualProperties" type="list">
        <att name="NODE_NESTED_NETWORK_IMAGE_VISIBLE" value="true" type="string"/>
        <att name="NODE_CUSTOMGRAPHICS_SIZE_2" value="0.0" type="string"/>
        <att name="NODE_CUSTOMGRAPHICS_SIZE_6" value="0.0" type="string"/>
        <att name="NODE_BORDER_STROKE" value="SOLID" type="string"/>
        <att name="NODE_CUSTOMGRAPHICS_POSITION_7" value="C,C,c,0.00,0.00" type="string"/>
        <att name="NODE_CUSTOMGRAPHICS_8" value="org.cytoscape.ding.customgraphics.NullCustomGraphics,0,[ Remove Graphics ]," type="string"/>
        <att name="NODE_TRANSPARENCY" value="255" type="string"/>
        <att name="NODE_LABEL_WIDTH" value="200.0" type="string"/>
        <att name="NODE_CUSTOMGRAPHICS_SIZE_1" value="0.0" type="string"/>
        <att name="NODE_CUSTOMGRAPHICS_5" value="org.cytoscape.ding.customgraphics.NullCustomGraphics,0,[ Remove Graphics ]," type="string"/>
        <att name="NODE_CUSTOMGRAPHICS_9" value="org.cytoscape.ding.customgraphics.NullCustomGraphics,0,[ Remove Graphics ]," type="string"/>
        <att name="NODE_CUSTOMGRAPHICS_1" value="org.cytoscape.ding.customgraphics.NullCustomGraphics,0,[ Remove Graphics ]," type="string"/>
        <att name="NODE_CUSTOMGRAPHICS_POSITION_6" value="C,C,c,0.00,0.00" type="string"/>
        <att name="NODE_CUSTOMGRAPHICS_POSITION_2" value="C,C,c,0.00,0.00" type="string"/>
        <att name="NODE_SELECTED_PAINT" value="#FFFF00" type="string"/>
        <att name="NODE_HEIGHT" value="30.0" type="string"/>
        <att name="NODE_CUSTOMGRAPHICS_POSITION_8" value="C,C,c,0.00,0.00" type="string"/>
        <att name="NODE_CUSTOMGRAPHICS_POSITION_9" value="C,C,c,0.00,0.00" type="string"/>
        <att name="NODE_CUSTOMGRAPHICS_POSITION_1" value="C,C,c,0.00,0.00" type="string"/>
        <att name="NODE_BORDER_TRANSPARENCY" value="255" type="string"/>
        <att name="NODE_CUSTOMGRAPHICS_SIZE_3" value="0.0" type="string"/>
        <att name="NODE_CUSTOMGRAPHICS_3" value="org.cytoscape.ding.customgraphics.NullCustomGraphics,0,[ Remove Graphics ]," type="string"/>
        <att name="NODE_CUSTOMGRAPHICS_7" value="org.cytoscape.ding.customgraphics.NullCustomGraphics,0,[ Remove Graphics ]," type="string"/>
        <att name="NODE_CUSTOMGRAPHICS_SIZE_7" value="0.0" type="string"/>
        <att name="NODE_CUSTOMGRAPHICS_SIZE_8" value="0.0" type="string"/>
        <att name="NODE_CUSTOMGRAPHICS_POSITION_5" value="C,C,c,0.00,0.00" type="string"/>
        <att name="NODE_SHAPE" value="ROUND_RECTANGLE" type="string"/>
        <att name="NODE_SELECTED" value="false" type="string"/>
        <att name="NODE_DEPTH" value="0.0" type="string"/>
        <att name="NODE_CUSTOMGRAPHICS_SIZE_5" value="0.0" type="string"/>
        <att name="NODE_FILL_COLOR" value="#C8C8C8" type="string"/>
        <att name="NODE_VISIBLE" value="true" type="string"/>
        <att name="NODE_BORDER_WIDTH" value="0.0" type="string"/>
        <att name="NODE_TOOLTIP" value="" type="string"/>
        <att name="NODE_BORDER_PAINT" value="#006699" type="string"/>
        <att name="NODE_CUSTOMGRAPHICS_6" value="org.cytoscape.ding.customgraphics.NullCustomGraphics,0,[ Remove Graphics ]," type="string"/>
        <att name="NODE_WIDTH" value="80.0" type="string"/>
        <att name="NODE_CUSTOMGRAPHICS_POSITION_3" value="C,C,c,0.00,0.00" type="string"/>
        <att name="NODE_CUSTOMGRAPHICS_4" value="org.cytoscape.ding.customgraphics.NullCustomGraphics,0,[ Remove Graphics ]," type="string"/>
        <att name="NODE_LABEL_POSITION" value="C,C,c,0.00,0.00" type="string"/>
        <att name="NODE_LABEL_TRANSPARENCY" value="255" type="string"/>
        <att name="NODE_CUSTOMGRAPHICS_SIZE_4" value="0.0" type="string"/>
        <att name="NODE_CUSTOMGRAPHICS_2" value="org.cytoscape.ding.customgraphics.NullCustomGraphics,0,[ Remove Graphics ]," type="string"/>
        <att name="NODE_CUSTOMGRAPHICS_POSITION_4" value="C,C,c,0.00,0.00" type="string"/>
        <att name="NODE_LABEL_FONT_FACE" value="Dialog.plain,plain,18" type="string"/>
        <att name="NODE_CUSTOMGRAPHICS_SIZE_9" value="0.0" type="string"/>
        <att name="NODE_LABEL_COLOR" value="#000000" type="string"/>
        <att name="NODE_LABEL_FONT_SIZE" value="18" type="string"/>
        <att name="NODE_LABEL" value="DYNC2H1" type="string"/>
      </att>
    </graphics>
  </node>
  <node id="2813" label="NCKAP5L" cy:nodeId="2069">
    <graphics y="205.12607058635984" z="0.0" x="-1004.4198431099292">
      <att name="lockedVisualProperties" type="list">
        <att name="NODE_NESTED_NETWORK_IMAGE_VISIBLE" value="true" type="string"/>
        <att name="NODE_CUSTOMGRAPHICS_SIZE_2" value="0.0" type="string"/>
        <att name="NODE_CUSTOMGRAPHICS_SIZE_6" value="0.0" type="string"/>
        <att name="NODE_BORDER_STROKE" value="SOLID" type="string"/>
        <att name="NODE_CUSTOMGRAPHICS_POSITION_7" value="C,C,c,0.00,0.00" type="string"/>
        <att name="NODE_CUSTOMGRAPHICS_8" value="org.cytoscape.ding.customgraphics.NullCustomGraphics,0,[ Remove Graphics ]," type="string"/>
        <att name="NODE_TRANSPARENCY" value="255" type="string"/>
        <att name="NODE_LABEL_WIDTH" value="200.0" type="string"/>
        <att name="NODE_CUSTOMGRAPHICS_SIZE_1" value="0.0" type="string"/>
        <att name="NODE_CUSTOMGRAPHICS_5" value="org.cytoscape.ding.customgraphics.NullCustomGraphics,0,[ Remove Graphics ]," type="string"/>
        <att name="NODE_CUSTOMGRAPHICS_9" value="org.cytoscape.ding.customgraphics.NullCustomGraphics,0,[ Remove Graphics ]," type="string"/>
        <att name="NODE_CUSTOMGRAPHICS_1" value="org.cytoscape.ding.customgraphics.NullCustomGraphics,0,[ Remove Graphics ]," type="string"/>
        <att name="NODE_CUSTOMGRAPHICS_POSITION_6" value="C,C,c,0.00,0.00" type="string"/>
        <att name="NODE_CUSTOMGRAPHICS_POSITION_2" value="C,C,c,0.00,0.00" type="string"/>
        <att name="NODE_SELECTED_PAINT" value="#FFFF00" type="string"/>
        <att name="NODE_HEIGHT" value="30.0" type="string"/>
        <att name="NODE_CUSTOMGRAPHICS_POSITION_8" value="C,C,c,0.00,0.00" type="string"/>
        <att name="NODE_CUSTOMGRAPHICS_POSITION_9" value="C,C,c,0.00,0.00" type="string"/>
        <att name="NODE_CUSTOMGRAPHICS_POSITION_1" value="C,C,c,0.00,0.00" type="string"/>
        <att name="NODE_BORDER_TRANSPARENCY" value="255" type="string"/>
        <att name="NODE_CUSTOMGRAPHICS_SIZE_3" value="0.0" type="string"/>
        <att name="NODE_CUSTOMGRAPHICS_3" value="org.cytoscape.ding.customgraphics.NullCustomGraphics,0,[ Remove Graphics ]," type="string"/>
        <att name="NODE_CUSTOMGRAPHICS_7" value="org.cytoscape.ding.customgraphics.NullCustomGraphics,0,[ Remove Graphics ]," type="string"/>
        <att name="NODE_CUSTOMGRAPHICS_SIZE_7" value="0.0" type="string"/>
        <att name="NODE_CUSTOMGRAPHICS_SIZE_8" value="0.0" type="string"/>
        <att name="NODE_CUSTOMGRAPHICS_POSITION_5" value="C,C,c,0.00,0.00" type="string"/>
        <att name="NODE_SHAPE" value="ROUND_RECTANGLE" type="string"/>
        <att name="NODE_SELECTED" value="false" type="string"/>
        <att name="NODE_DEPTH" value="0.0" type="string"/>
        <att name="NODE_CUSTOMGRAPHICS_SIZE_5" value="0.0" type="string"/>
        <att name="NODE_FILL_COLOR" value="#C8C8C8" type="string"/>
        <att name="NODE_VISIBLE" value="true" type="string"/>
        <att name="NODE_BORDER_WIDTH" value="0.0" type="string"/>
        <att name="NODE_TOOLTIP" value="" type="string"/>
        <att name="NODE_BORDER_PAINT" value="#006699" type="string"/>
        <att name="NODE_CUSTOMGRAPHICS_6" value="org.cytoscape.ding.customgraphics.NullCustomGraphics,0,[ Remove Graphics ]," type="string"/>
        <att name="NODE_WIDTH" value="80.0" type="string"/>
        <att name="NODE_CUSTOMGRAPHICS_POSITION_3" value="C,C,c,0.00,0.00" type="string"/>
        <att name="NODE_CUSTOMGRAPHICS_4" value="org.cytoscape.ding.customgraphics.NullCustomGraphics,0,[ Remove Graphics ]," type="string"/>
        <att name="NODE_LABEL_POSITION" value="C,C,c,0.00,0.00" type="string"/>
        <att name="NODE_LABEL_TRANSPARENCY" value="255" type="string"/>
        <att name="NODE_CUSTOMGRAPHICS_SIZE_4" value="0.0" type="string"/>
        <att name="NODE_CUSTOMGRAPHICS_2" value="org.cytoscape.ding.customgraphics.NullCustomGraphics,0,[ Remove Graphics ]," type="string"/>
        <att name="NODE_CUSTOMGRAPHICS_POSITION_4" value="C,C,c,0.00,0.00" type="string"/>
        <att name="NODE_LABEL_FONT_FACE" value="Dialog.plain,plain,18" type="string"/>
        <att name="NODE_CUSTOMGRAPHICS_SIZE_9" value="0.0" type="string"/>
        <att name="NODE_LABEL_COLOR" value="#000000" type="string"/>
        <att name="NODE_LABEL_FONT_SIZE" value="18" type="string"/>
        <att name="NODE_LABEL" value="NCKAP5L" type="string"/>
      </att>
    </graphics>
  </node>
  <node id="2812" label="PRDX4" cy:nodeId="2070">
    <graphics y="-1230.2158203125" z="0.0" x="1372.6229248046875">
      <att name="lockedVisualProperties" type="list">
        <att name="NODE_NESTED_NETWORK_IMAGE_VISIBLE" value="true" type="string"/>
        <att name="NODE_CUSTOMGRAPHICS_SIZE_2" value="0.0" type="string"/>
        <att name="NODE_CUSTOMGRAPHICS_SIZE_6" value="0.0" type="string"/>
        <att name="NODE_BORDER_STROKE" value="SOLID" type="string"/>
        <att name="NODE_CUSTOMGRAPHICS_POSITION_7" value="C,C,c,0.00,0.00" type="string"/>
        <att name="NODE_CUSTOMGRAPHICS_8" value="org.cytoscape.ding.customgraphics.NullCustomGraphics,0,[ Remove Graphics ]," type="string"/>
        <att name="NODE_TRANSPARENCY" value="255" type="string"/>
        <att name="NODE_LABEL_WIDTH" value="200.0" type="string"/>
        <att name="NODE_CUSTOMGRAPHICS_SIZE_1" value="0.0" type="string"/>
        <att name="NODE_CUSTOMGRAPHICS_5" value="org.cytoscape.ding.customgraphics.NullCustomGraphics,0,[ Remove Graphics ]," type="string"/>
        <att name="NODE_CUSTOMGRAPHICS_9" value="org.cytoscape.ding.customgraphics.NullCustomGraphics,0,[ Remove Graphics ]," type="string"/>
        <att name="NODE_CUSTOMGRAPHICS_1" value="org.cytoscape.ding.customgraphics.NullCustomGraphics,0,[ Remove Graphics ]," type="string"/>
        <att name="NODE_CUSTOMGRAPHICS_POSITION_6" value="C,C,c,0.00,0.00" type="string"/>
        <att name="NODE_CUSTOMGRAPHICS_POSITION_2" value="C,C,c,0.00,0.00" type="string"/>
        <att name="NODE_SELECTED_PAINT" value="#FFFF00" type="string"/>
        <att name="NODE_HEIGHT" value="30.0" type="string"/>
        <att name="NODE_CUSTOMGRAPHICS_POSITION_8" value="C,C,c,0.00,0.00" type="string"/>
        <att name="NODE_CUSTOMGRAPHICS_POSITION_9" value="C,C,c,0.00,0.00" type="string"/>
        <att name="NODE_CUSTOMGRAPHICS_POSITION_1" value="C,C,c,0.00,0.00" type="string"/>
        <att name="NODE_BORDER_TRANSPARENCY" value="255" type="string"/>
        <att name="NODE_CUSTOMGRAPHICS_SIZE_3" value="0.0" type="string"/>
        <att name="NODE_CUSTOMGRAPHICS_3" value="org.cytoscape.ding.customgraphics.NullCustomGraphics,0,[ Remove Graphics ]," type="string"/>
        <att name="NODE_CUSTOMGRAPHICS_7" value="org.cytoscape.ding.customgraphics.NullCustomGraphics,0,[ Remove Graphics ]," type="string"/>
        <att name="NODE_CUSTOMGRAPHICS_SIZE_7" value="0.0" type="string"/>
        <att name="NODE_CUSTOMGRAPHICS_SIZE_8" value="0.0" type="string"/>
        <att name="NODE_CUSTOMGRAPHICS_POSITION_5" value="C,C,c,0.00,0.00" type="string"/>
        <att name="NODE_SHAPE" value="ROUND_RECTANGLE" type="string"/>
        <att name="NODE_SELECTED" value="false" type="string"/>
        <att name="NODE_DEPTH" value="0.0" type="string"/>
        <att name="NODE_CUSTOMGRAPHICS_SIZE_5" value="0.0" type="string"/>
        <att name="NODE_FILL_COLOR" value="#C8C8C8" type="string"/>
        <att name="NODE_VISIBLE" value="true" type="string"/>
        <att name="NODE_BORDER_WIDTH" value="0.0" type="string"/>
        <att name="NODE_TOOLTIP" value="" type="string"/>
        <att name="NODE_BORDER_PAINT" value="#006699" type="string"/>
        <att name="NODE_CUSTOMGRAPHICS_6" value="org.cytoscape.ding.customgraphics.NullCustomGraphics,0,[ Remove Graphics ]," type="string"/>
        <att name="NODE_WIDTH" value="80.0" type="string"/>
        <att name="NODE_CUSTOMGRAPHICS_POSITION_3" value="C,C,c,0.00,0.00" type="string"/>
        <att name="NODE_CUSTOMGRAPHICS_4" value="org.cytoscape.ding.customgraphics.NullCustomGraphics,0,[ Remove Graphics ]," type="string"/>
        <att name="NODE_LABEL_POSITION" value="C,C,c,0.00,0.00" type="string"/>
        <att name="NODE_LABEL_TRANSPARENCY" value="255" type="string"/>
        <att name="NODE_CUSTOMGRAPHICS_SIZE_4" value="0.0" type="string"/>
        <att name="NODE_CUSTOMGRAPHICS_2" value="org.cytoscape.ding.customgraphics.NullCustomGraphics,0,[ Remove Graphics ]," type="string"/>
        <att name="NODE_CUSTOMGRAPHICS_POSITION_4" value="C,C,c,0.00,0.00" type="string"/>
        <att name="NODE_LABEL_FONT_FACE" value="Dialog.plain,plain,18" type="string"/>
        <att name="NODE_CUSTOMGRAPHICS_SIZE_9" value="0.0" type="string"/>
        <att name="NODE_LABEL_COLOR" value="#000000" type="string"/>
        <att name="NODE_LABEL_FONT_SIZE" value="18" type="string"/>
        <att name="NODE_LABEL" value="PRDX4" type="string"/>
      </att>
    </graphics>
  </node>
  <node id="2811" label="CKMT1A" cy:nodeId="2071">
    <graphics y="-1280.1741306821277" z="0.0" x="1273.947207208497">
      <att name="lockedVisualProperties" type="list">
        <att name="NODE_NESTED_NETWORK_IMAGE_VISIBLE" value="true" type="string"/>
        <att name="NODE_CUSTOMGRAPHICS_SIZE_2" value="0.0" type="string"/>
        <att name="NODE_CUSTOMGRAPHICS_SIZE_6" value="0.0" type="string"/>
        <att name="NODE_BORDER_STROKE" value="SOLID" type="string"/>
        <att name="NODE_CUSTOMGRAPHICS_POSITION_7" value="C,C,c,0.00,0.00" type="string"/>
        <att name="NODE_CUSTOMGRAPHICS_8" value="org.cytoscape.ding.customgraphics.NullCustomGraphics,0,[ Remove Graphics ]," type="string"/>
        <att name="NODE_TRANSPARENCY" value="255" type="string"/>
        <att name="NODE_LABEL_WIDTH" value="200.0" type="string"/>
        <att name="NODE_CUSTOMGRAPHICS_SIZE_1" value="0.0" type="string"/>
        <att name="NODE_CUSTOMGRAPHICS_5" value="org.cytoscape.ding.customgraphics.NullCustomGraphics,0,[ Remove Graphics ]," type="string"/>
        <att name="NODE_CUSTOMGRAPHICS_9" value="org.cytoscape.ding.customgraphics.NullCustomGraphics,0,[ Remove Graphics ]," type="string"/>
        <att name="NODE_CUSTOMGRAPHICS_1" value="org.cytoscape.ding.customgraphics.NullCustomGraphics,0,[ Remove Graphics ]," type="string"/>
        <att name="NODE_CUSTOMGRAPHICS_POSITION_6" value="C,C,c,0.00,0.00" type="string"/>
        <att name="NODE_CUSTOMGRAPHICS_POSITION_2" value="C,C,c,0.00,0.00" type="string"/>
        <att name="NODE_SELECTED_PAINT" value="#FFFF00" type="string"/>
        <att name="NODE_HEIGHT" value="30.0" type="string"/>
        <att name="NODE_CUSTOMGRAPHICS_POSITION_8" value="C,C,c,0.00,0.00" type="string"/>
        <att name="NODE_CUSTOMGRAPHICS_POSITION_9" value="C,C,c,0.00,0.00" type="string"/>
        <att name="NODE_CUSTOMGRAPHICS_POSITION_1" value="C,C,c,0.00,0.00" type="string"/>
        <att name="NODE_BORDER_TRANSPARENCY" value="255" type="string"/>
        <att name="NODE_CUSTOMGRAPHICS_SIZE_3" value="0.0" type="string"/>
        <att name="NODE_CUSTOMGRAPHICS_3" value="org.cytoscape.ding.customgraphics.NullCustomGraphics,0,[ Remove Graphics ]," type="string"/>
        <att name="NODE_CUSTOMGRAPHICS_7" value="org.cytoscape.ding.customgraphics.NullCustomGraphics,0,[ Remove Graphics ]," type="string"/>
        <att name="NODE_CUSTOMGRAPHICS_SIZE_7" value="0.0" type="string"/>
        <att name="NODE_CUSTOMGRAPHICS_SIZE_8" value="0.0" type="string"/>
        <att name="NODE_CUSTOMGRAPHICS_POSITION_5" value="C,C,c,0.00,0.00" type="string"/>
        <att name="NODE_SHAPE" value="ROUND_RECTANGLE" type="string"/>
        <att name="NODE_SELECTED" value="false" type="string"/>
        <att name="NODE_DEPTH" value="0.0" type="string"/>
        <att name="NODE_CUSTOMGRAPHICS_SIZE_5" value="0.0" type="string"/>
        <att name="NODE_FILL_COLOR" value="#C8C8C8" type="string"/>
        <att name="NODE_VISIBLE" value="true" type="string"/>
        <att name="NODE_BORDER_WIDTH" value="0.0" type="string"/>
        <att name="NODE_TOOLTIP" value="" type="string"/>
        <att name="NODE_BORDER_PAINT" value="#006699" type="string"/>
        <att name="NODE_CUSTOMGRAPHICS_6" value="org.cytoscape.ding.customgraphics.NullCustomGraphics,0,[ Remove Graphics ]," type="string"/>
        <att name="NODE_WIDTH" value="80.0" type="string"/>
        <att name="NODE_CUSTOMGRAPHICS_POSITION_3" value="C,C,c,0.00,0.00" type="string"/>
        <att name="NODE_CUSTOMGRAPHICS_4" value="org.cytoscape.ding.customgraphics.NullCustomGraphics,0,[ Remove Graphics ]," type="string"/>
        <att name="NODE_LABEL_POSITION" value="C,C,c,0.00,0.00" type="string"/>
        <att name="NODE_LABEL_TRANSPARENCY" value="255" type="string"/>
        <att name="NODE_CUSTOMGRAPHICS_SIZE_4" value="0.0" type="string"/>
        <att name="NODE_CUSTOMGRAPHICS_2" value="org.cytoscape.ding.customgraphics.NullCustomGraphics,0,[ Remove Graphics ]," type="string"/>
        <att name="NODE_CUSTOMGRAPHICS_POSITION_4" value="C,C,c,0.00,0.00" type="string"/>
        <att name="NODE_LABEL_FONT_FACE" value="Dialog.plain,plain,18" type="string"/>
        <att name="NODE_CUSTOMGRAPHICS_SIZE_9" value="0.0" type="string"/>
        <att name="NODE_LABEL_COLOR" value="#000000" type="string"/>
        <att name="NODE_LABEL_FONT_SIZE" value="18" type="string"/>
        <att name="NODE_LABEL" value="CKMT1A" type="string"/>
      </att>
    </graphics>
  </node>
  <node id="2810" label="PRRC2A" cy:nodeId="2072">
    <graphics y="242.42219790569578" z="0.0" x="-1007.8478216255542">
      <att name="lockedVisualProperties" type="list">
        <att name="NODE_NESTED_NETWORK_IMAGE_VISIBLE" value="true" type="string"/>
        <att name="NODE_CUSTOMGRAPHICS_SIZE_2" value="0.0" type="string"/>
        <att name="NODE_CUSTOMGRAPHICS_SIZE_6" value="0.0" type="string"/>
        <att name="NODE_BORDER_STROKE" value="SOLID" type="string"/>
        <att name="NODE_CUSTOMGRAPHICS_POSITION_7" value="C,C,c,0.00,0.00" type="string"/>
        <att name="NODE_CUSTOMGRAPHICS_8" value="org.cytoscape.ding.customgraphics.NullCustomGraphics,0,[ Remove Graphics ]," type="string"/>
        <att name="NODE_TRANSPARENCY" value="255" type="string"/>
        <att name="NODE_LABEL_WIDTH" value="200.0" type="string"/>
        <att name="NODE_CUSTOMGRAPHICS_SIZE_1" value="0.0" type="string"/>
        <att name="NODE_CUSTOMGRAPHICS_5" value="org.cytoscape.ding.customgraphics.NullCustomGraphics,0,[ Remove Graphics ]," type="string"/>
        <att name="NODE_CUSTOMGRAPHICS_9" value="org.cytoscape.ding.customgraphics.NullCustomGraphics,0,[ Remove Graphics ]," type="string"/>
        <att name="NODE_CUSTOMGRAPHICS_1" value="org.cytoscape.ding.customgraphics.NullCustomGraphics,0,[ Remove Graphics ]," type="string"/>
        <att name="NODE_CUSTOMGRAPHICS_POSITION_6" value="C,C,c,0.00,0.00" type="string"/>
        <att name="NODE_CUSTOMGRAPHICS_POSITION_2" value="C,C,c,0.00,0.00" type="string"/>
        <att name="NODE_SELECTED_PAINT" value="#FFFF00" type="string"/>
        <att name="NODE_HEIGHT" value="30.0" type="string"/>
        <att name="NODE_CUSTOMGRAPHICS_POSITION_8" value="C,C,c,0.00,0.00" type="string"/>
        <att name="NODE_CUSTOMGRAPHICS_POSITION_9" value="C,C,c,0.00,0.00" type="string"/>
        <att name="NODE_CUSTOMGRAPHICS_POSITION_1" value="C,C,c,0.00,0.00" type="string"/>
        <att name="NODE_BORDER_TRANSPARENCY" value="255" type="string"/>
        <att name="NODE_CUSTOMGRAPHICS_SIZE_3" value="0.0" type="string"/>
        <att name="NODE_CUSTOMGRAPHICS_3" value="org.cytoscape.ding.customgraphics.NullCustomGraphics,0,[ Remove Graphics ]," type="string"/>
        <att name="NODE_CUSTOMGRAPHICS_7" value="org.cytoscape.ding.customgraphics.NullCustomGraphics,0,[ Remove Graphics ]," type="string"/>
        <att name="NODE_CUSTOMGRAPHICS_SIZE_7" value="0.0" type="string"/>
        <att name="NODE_CUSTOMGRAPHICS_SIZE_8" value="0.0" type="string"/>
        <att name="NODE_CUSTOMGRAPHICS_POSITION_5" value="C,C,c,0.00,0.00" type="string"/>
        <att name="NODE_SHAPE" value="ROUND_RECTANGLE" type="string"/>
        <att name="NODE_SELECTED" value="false" type="string"/>
        <att name="NODE_DEPTH" value="0.0" type="string"/>
        <att name="NODE_CUSTOMGRAPHICS_SIZE_5" value="0.0" type="string"/>
        <att name="NODE_FILL_COLOR" value="#C8C8C8" type="string"/>
        <att name="NODE_VISIBLE" value="true" type="string"/>
        <att name="NODE_BORDER_WIDTH" value="0.0" type="string"/>
        <att name="NODE_TOOLTIP" value="" type="string"/>
        <att name="NODE_BORDER_PAINT" value="#006699" type="string"/>
        <att name="NODE_CUSTOMGRAPHICS_6" value="org.cytoscape.ding.customgraphics.NullCustomGraphics,0,[ Remove Graphics ]," type="string"/>
        <att name="NODE_WIDTH" value="80.0" type="string"/>
        <att name="NODE_CUSTOMGRAPHICS_POSITION_3" value="C,C,c,0.00,0.00" type="string"/>
        <att name="NODE_CUSTOMGRAPHICS_4" value="org.cytoscape.ding.customgraphics.NullCustomGraphics,0,[ Remove Graphics ]," type="string"/>
        <att name="NODE_LABEL_POSITION" value="C,C,c,0.00,0.00" type="string"/>
        <att name="NODE_LABEL_TRANSPARENCY" value="255" type="string"/>
        <att name="NODE_CUSTOMGRAPHICS_SIZE_4" value="0.0" type="string"/>
        <att name="NODE_CUSTOMGRAPHICS_2" value="org.cytoscape.ding.customgraphics.NullCustomGraphics,0,[ Remove Graphics ]," type="string"/>
        <att name="NODE_CUSTOMGRAPHICS_POSITION_4" value="C,C,c,0.00,0.00" type="string"/>
        <att name="NODE_LABEL_FONT_FACE" value="Dialog.plain,plain,18" type="string"/>
        <att name="NODE_CUSTOMGRAPHICS_SIZE_9" value="0.0" type="string"/>
        <att name="NODE_LABEL_COLOR" value="#000000" type="string"/>
        <att name="NODE_LABEL_FONT_SIZE" value="18" type="string"/>
        <att name="NODE_LABEL" value="PRRC2A" type="string"/>
      </att>
    </graphics>
  </node>
  <node id="2809" label="GOLGA7B" cy:nodeId="2073">
    <graphics y="-1140.92431640625" z="0.0" x="1278.6376953125">
      <att name="lockedVisualProperties" type="list">
        <att name="NODE_NESTED_NETWORK_IMAGE_VISIBLE" value="true" type="string"/>
        <att name="NODE_CUSTOMGRAPHICS_SIZE_2" value="0.0" type="string"/>
        <att name="NODE_CUSTOMGRAPHICS_SIZE_6" value="0.0" type="string"/>
        <att name="NODE_BORDER_STROKE" value="SOLID" type="string"/>
        <att name="NODE_CUSTOMGRAPHICS_POSITION_7" value="C,C,c,0.00,0.00" type="string"/>
        <att name="NODE_CUSTOMGRAPHICS_8" value="org.cytoscape.ding.customgraphics.NullCustomGraphics,0,[ Remove Graphics ]," type="string"/>
        <att name="NODE_TRANSPARENCY" value="255" type="string"/>
        <att name="NODE_LABEL_WIDTH" value="200.0" type="string"/>
        <att name="NODE_CUSTOMGRAPHICS_SIZE_1" value="0.0" type="string"/>
        <att name="NODE_CUSTOMGRAPHICS_5" value="org.cytoscape.ding.customgraphics.NullCustomGraphics,0,[ Remove Graphics ]," type="string"/>
        <att name="NODE_CUSTOMGRAPHICS_9" value="org.cytoscape.ding.customgraphics.NullCustomGraphics,0,[ Remove Graphics ]," type="string"/>
        <att name="NODE_CUSTOMGRAPHICS_1" value="org.cytoscape.ding.customgraphics.NullCustomGraphics,0,[ Remove Graphics ]," type="string"/>
        <att name="NODE_CUSTOMGRAPHICS_POSITION_6" value="C,C,c,0.00,0.00" type="string"/>
        <att name="NODE_CUSTOMGRAPHICS_POSITION_2" value="C,C,c,0.00,0.00" type="string"/>
        <att name="NODE_SELECTED_PAINT" value="#FFFF00" type="string"/>
        <att name="NODE_HEIGHT" value="30.0" type="string"/>
        <att name="NODE_CUSTOMGRAPHICS_POSITION_8" value="C,C,c,0.00,0.00" type="string"/>
        <att name="NODE_CUSTOMGRAPHICS_POSITION_9" value="C,C,c,0.00,0.00" type="string"/>
        <att name="NODE_CUSTOMGRAPHICS_POSITION_1" value="C,C,c,0.00,0.00" type="string"/>
        <att name="NODE_BORDER_TRANSPARENCY" value="255" type="string"/>
        <att name="NODE_CUSTOMGRAPHICS_SIZE_3" value="0.0" type="string"/>
        <att name="NODE_CUSTOMGRAPHICS_3" value="org.cytoscape.ding.customgraphics.NullCustomGraphics,0,[ Remove Graphics ]," type="string"/>
        <att name="NODE_CUSTOMGRAPHICS_7" value="org.cytoscape.ding.customgraphics.NullCustomGraphics,0,[ Remove Graphics ]," type="string"/>
        <att name="NODE_CUSTOMGRAPHICS_SIZE_7" value="0.0" type="string"/>
        <att name="NODE_CUSTOMGRAPHICS_SIZE_8" value="0.0" type="string"/>
        <att name="NODE_CUSTOMGRAPHICS_POSITION_5" value="C,C,c,0.00,0.00" type="string"/>
        <att name="NODE_SHAPE" value="ROUND_RECTANGLE" type="string"/>
        <att name="NODE_SELECTED" value="false" type="string"/>
        <att name="NODE_DEPTH" value="0.0" type="string"/>
        <att name="NODE_CUSTOMGRAPHICS_SIZE_5" value="0.0" type="string"/>
        <att name="NODE_FILL_COLOR" value="#C8C8C8" type="string"/>
        <att name="NODE_VISIBLE" value="true" type="string"/>
        <att name="NODE_BORDER_WIDTH" value="0.0" type="string"/>
        <att name="NODE_TOOLTIP" value="" type="string"/>
        <att name="NODE_BORDER_PAINT" value="#006699" type="string"/>
        <att name="NODE_CUSTOMGRAPHICS_6" value="org.cytoscape.ding.customgraphics.NullCustomGraphics,0,[ Remove Graphics ]," type="string"/>
        <att name="NODE_WIDTH" value="80.0" type="string"/>
        <att name="NODE_CUSTOMGRAPHICS_POSITION_3" value="C,C,c,0.00,0.00" type="string"/>
        <att name="NODE_CUSTOMGRAPHICS_4" value="org.cytoscape.ding.customgraphics.NullCustomGraphics,0,[ Remove Graphics ]," type="string"/>
        <att name="NODE_LABEL_POSITION" value="C,C,c,0.00,0.00" type="string"/>
        <att name="NODE_LABEL_TRANSPARENCY" value="255" type="string"/>
        <att name="NODE_CUSTOMGRAPHICS_SIZE_4" value="0.0" type="string"/>
        <att name="NODE_CUSTOMGRAPHICS_2" value="org.cytoscape.ding.customgraphics.NullCustomGraphics,0,[ Remove Graphics ]," type="string"/>
        <att name="NODE_CUSTOMGRAPHICS_POSITION_4" value="C,C,c,0.00,0.00" type="string"/>
        <att name="NODE_LABEL_FONT_FACE" value="Dialog.plain,plain,18" type="string"/>
        <att name="NODE_CUSTOMGRAPHICS_SIZE_9" value="0.0" type="string"/>
        <att name="NODE_LABEL_COLOR" value="#000000" type="string"/>
        <att name="NODE_LABEL_FONT_SIZE" value="18" type="string"/>
        <att name="NODE_LABEL" value="GOLGA7B" type="string"/>
      </att>
    </graphics>
  </node>
  <node id="2808" label="TRIM25" cy:nodeId="2074">
    <graphics y="242.2669446692358" z="0.0" x="-574.2133178710938">
      <att name="lockedVisualProperties" type="list">
        <att name="NODE_NESTED_NETWORK_IMAGE_VISIBLE" value="true" type="string"/>
        <att name="NODE_CUSTOMGRAPHICS_SIZE_2" value="0.0" type="string"/>
        <att name="NODE_CUSTOMGRAPHICS_SIZE_6" value="0.0" type="string"/>
        <att name="NODE_BORDER_STROKE" value="SOLID" type="string"/>
        <att name="NODE_CUSTOMGRAPHICS_POSITION_7" value="C,C,c,0.00,0.00" type="string"/>
        <att name="NODE_CUSTOMGRAPHICS_8" value="org.cytoscape.ding.customgraphics.NullCustomGraphics,0,[ Remove Graphics ]," type="string"/>
        <att name="NODE_TRANSPARENCY" value="255" type="string"/>
        <att name="NODE_LABEL_WIDTH" value="200.0" type="string"/>
        <att name="NODE_CUSTOMGRAPHICS_SIZE_1" value="0.0" type="string"/>
        <att name="NODE_CUSTOMGRAPHICS_5" value="org.cytoscape.ding.customgraphics.NullCustomGraphics,0,[ Remove Graphics ]," type="string"/>
        <att name="NODE_CUSTOMGRAPHICS_9" value="org.cytoscape.ding.customgraphics.NullCustomGraphics,0,[ Remove Graphics ]," type="string"/>
        <att name="NODE_CUSTOMGRAPHICS_1" value="org.cytoscape.ding.customgraphics.NullCustomGraphics,0,[ Remove Graphics ]," type="string"/>
        <att name="NODE_CUSTOMGRAPHICS_POSITION_6" value="C,C,c,0.00,0.00" type="string"/>
        <att name="NODE_CUSTOMGRAPHICS_POSITION_2" value="C,C,c,0.00,0.00" type="string"/>
        <att name="NODE_SELECTED_PAINT" value="#FFFF00" type="string"/>
        <att name="NODE_HEIGHT" value="30.0" type="string"/>
        <att name="NODE_CUSTOMGRAPHICS_POSITION_8" value="C,C,c,0.00,0.00" type="string"/>
        <att name="NODE_CUSTOMGRAPHICS_POSITION_9" value="C,C,c,0.00,0.00" type="string"/>
        <att name="NODE_CUSTOMGRAPHICS_POSITION_1" value="C,C,c,0.00,0.00" type="string"/>
        <att name="NODE_BORDER_TRANSPARENCY" value="255" type="string"/>
        <att name="NODE_CUSTOMGRAPHICS_SIZE_3" value="0.0" type="string"/>
        <att name="NODE_CUSTOMGRAPHICS_3" value="org.cytoscape.ding.customgraphics.NullCustomGraphics,0,[ Remove Graphics ]," type="string"/>
        <att name="NODE_CUSTOMGRAPHICS_7" value="org.cytoscape.ding.customgraphics.NullCustomGraphics,0,[ Remove Graphics ]," type="string"/>
        <att name="NODE_CUSTOMGRAPHICS_SIZE_7" value="0.0" type="string"/>
        <att name="NODE_CUSTOMGRAPHICS_SIZE_8" value="0.0" type="string"/>
        <att name="NODE_CUSTOMGRAPHICS_POSITION_5" value="C,C,c,0.00,0.00" type="string"/>
        <att name="NODE_SHAPE" value="ROUND_RECTANGLE" type="string"/>
        <att name="NODE_SELECTED" value="false" type="string"/>
        <att name="NODE_DEPTH" value="0.0" type="string"/>
        <att name="NODE_CUSTOMGRAPHICS_SIZE_5" value="0.0" type="string"/>
        <att name="NODE_FILL_COLOR" value="#FF9F1C" type="string"/>
        <att name="NODE_VISIBLE" value="true" type="string"/>
        <att name="NODE_BORDER_WIDTH" value="0.0" type="string"/>
        <att name="NODE_TOOLTIP" value="" type="string"/>
        <att name="NODE_BORDER_PAINT" value="#006699" type="string"/>
        <att name="NODE_CUSTOMGRAPHICS_6" value="org.cytoscape.ding.customgraphics.NullCustomGraphics,0,[ Remove Graphics ]," type="string"/>
        <att name="NODE_WIDTH" value="80.0" type="string"/>
        <att name="NODE_CUSTOMGRAPHICS_POSITION_3" value="C,C,c,0.00,0.00" type="string"/>
        <att name="NODE_CUSTOMGRAPHICS_4" value="org.cytoscape.ding.customgraphics.NullCustomGraphics,0,[ Remove Graphics ]," type="string"/>
        <att name="NODE_LABEL_POSITION" value="C,C,c,0.00,0.00" type="string"/>
        <att name="NODE_LABEL_TRANSPARENCY" value="255" type="string"/>
        <att name="NODE_CUSTOMGRAPHICS_SIZE_4" value="0.0" type="string"/>
        <att name="NODE_CUSTOMGRAPHICS_2" value="org.cytoscape.ding.customgraphics.NullCustomGraphics,0,[ Remove Graphics ]," type="string"/>
        <att name="NODE_CUSTOMGRAPHICS_POSITION_4" value="C,C,c,0.00,0.00" type="string"/>
        <att name="NODE_LABEL_FONT_FACE" value="Dialog.plain,plain,18" type="string"/>
        <att name="NODE_CUSTOMGRAPHICS_SIZE_9" value="0.0" type="string"/>
        <att name="NODE_LABEL_COLOR" value="#000000" type="string"/>
        <att name="NODE_LABEL_FONT_SIZE" value="18" type="string"/>
        <att name="NODE_LABEL" value="TRIM25" type="string"/>
      </att>
    </graphics>
  </node>
  <node id="2807" label="EPB41L4B" cy:nodeId="2075">
    <graphics y="-1174.7332763671875" z="0.0" x="1277.8572998046875">
      <att name="lockedVisualProperties" type="list">
        <att name="NODE_NESTED_NETWORK_IMAGE_VISIBLE" value="true" type="string"/>
        <att name="NODE_CUSTOMGRAPHICS_SIZE_2" value="0.0" type="string"/>
        <att name="NODE_CUSTOMGRAPHICS_SIZE_6" value="0.0" type="string"/>
        <att name="NODE_BORDER_STROKE" value="SOLID" type="string"/>
        <att name="NODE_CUSTOMGRAPHICS_POSITION_7" value="C,C,c,0.00,0.00" type="string"/>
        <att name="NODE_CUSTOMGRAPHICS_8" value="org.cytoscape.ding.customgraphics.NullCustomGraphics,0,[ Remove Graphics ]," type="string"/>
        <att name="NODE_TRANSPARENCY" value="255" type="string"/>
        <att name="NODE_LABEL_WIDTH" value="200.0" type="string"/>
        <att name="NODE_CUSTOMGRAPHICS_SIZE_1" value="0.0" type="string"/>
        <att name="NODE_CUSTOMGRAPHICS_5" value="org.cytoscape.ding.customgraphics.NullCustomGraphics,0,[ Remove Graphics ]," type="string"/>
        <att name="NODE_CUSTOMGRAPHICS_9" value="org.cytoscape.ding.customgraphics.NullCustomGraphics,0,[ Remove Graphics ]," type="string"/>
        <att name="NODE_CUSTOMGRAPHICS_1" value="org.cytoscape.ding.customgraphics.NullCustomGraphics,0,[ Remove Graphics ]," type="string"/>
        <att name="NODE_CUSTOMGRAPHICS_POSITION_6" value="C,C,c,0.00,0.00" type="string"/>
        <att name="NODE_CUSTOMGRAPHICS_POSITION_2" value="C,C,c,0.00,0.00" type="string"/>
        <att name="NODE_SELECTED_PAINT" value="#FFFF00" type="string"/>
        <att name="NODE_HEIGHT" value="30.0" type="string"/>
        <att name="NODE_CUSTOMGRAPHICS_POSITION_8" value="C,C,c,0.00,0.00" type="string"/>
        <att name="NODE_CUSTOMGRAPHICS_POSITION_9" value="C,C,c,0.00,0.00" type="string"/>
        <att name="NODE_CUSTOMGRAPHICS_POSITION_1" value="C,C,c,0.00,0.00" type="string"/>
        <att name="NODE_BORDER_TRANSPARENCY" value="255" type="string"/>
        <att name="NODE_CUSTOMGRAPHICS_SIZE_3" value="0.0" type="string"/>
        <att name="NODE_CUSTOMGRAPHICS_3" value="org.cytoscape.ding.customgraphics.NullCustomGraphics,0,[ Remove Graphics ]," type="string"/>
        <att name="NODE_CUSTOMGRAPHICS_7" value="org.cytoscape.ding.customgraphics.NullCustomGraphics,0,[ Remove Graphics ]," type="string"/>
        <att name="NODE_CUSTOMGRAPHICS_SIZE_7" value="0.0" type="string"/>
        <att name="NODE_CUSTOMGRAPHICS_SIZE_8" value="0.0" type="string"/>
        <att name="NODE_CUSTOMGRAPHICS_POSITION_5" value="C,C,c,0.00,0.00" type="string"/>
        <att name="NODE_SHAPE" value="ROUND_RECTANGLE" type="string"/>
        <att name="NODE_SELECTED" value="false" type="string"/>
        <att name="NODE_DEPTH" value="0.0" type="string"/>
        <att name="NODE_CUSTOMGRAPHICS_SIZE_5" value="0.0" type="string"/>
        <att name="NODE_FILL_COLOR" value="#C8C8C8" type="string"/>
        <att name="NODE_VISIBLE" value="true" type="string"/>
        <att name="NODE_BORDER_WIDTH" value="0.0" type="string"/>
        <att name="NODE_TOOLTIP" value="" type="string"/>
        <att name="NODE_BORDER_PAINT" value="#006699" type="string"/>
        <att name="NODE_CUSTOMGRAPHICS_6" value="org.cytoscape.ding.customgraphics.NullCustomGraphics,0,[ Remove Graphics ]," type="string"/>
        <att name="NODE_WIDTH" value="80.0" type="string"/>
        <att name="NODE_CUSTOMGRAPHICS_POSITION_3" value="C,C,c,0.00,0.00" type="string"/>
        <att name="NODE_CUSTOMGRAPHICS_4" value="org.cytoscape.ding.customgraphics.NullCustomGraphics,0,[ Remove Graphics ]," type="string"/>
        <att name="NODE_LABEL_POSITION" value="C,C,c,0.00,0.00" type="string"/>
        <att name="NODE_LABEL_TRANSPARENCY" value="255" type="string"/>
        <att name="NODE_CUSTOMGRAPHICS_SIZE_4" value="0.0" type="string"/>
        <att name="NODE_CUSTOMGRAPHICS_2" value="org.cytoscape.ding.customgraphics.NullCustomGraphics,0,[ Remove Graphics ]," type="string"/>
        <att name="NODE_CUSTOMGRAPHICS_POSITION_4" value="C,C,c,0.00,0.00" type="string"/>
        <att name="NODE_LABEL_FONT_FACE" value="Dialog.plain,plain,18" type="string"/>
        <att name="NODE_CUSTOMGRAPHICS_SIZE_9" value="0.0" type="string"/>
        <att name="NODE_LABEL_COLOR" value="#000000" type="string"/>
        <att name="NODE_LABEL_FONT_SIZE" value="18" type="string"/>
        <att name="NODE_LABEL" value="EPB41L4B" type="string"/>
      </att>
    </graphics>
  </node>
  <node id="2806" label="AMOTL1" cy:nodeId="2076">
    <graphics y="-43.789321534346584" z="0.0" x="64.60153942928267">
      <att name="lockedVisualProperties" type="list">
        <att name="NODE_NESTED_NETWORK_IMAGE_VISIBLE" value="true" type="string"/>
        <att name="NODE_CUSTOMGRAPHICS_SIZE_2" value="0.0" type="string"/>
        <att name="NODE_CUSTOMGRAPHICS_SIZE_6" value="0.0" type="string"/>
        <att name="NODE_BORDER_STROKE" value="SOLID" type="string"/>
        <att name="NODE_CUSTOMGRAPHICS_POSITION_7" value="C,C,c,0.00,0.00" type="string"/>
        <att name="NODE_CUSTOMGRAPHICS_8" value="org.cytoscape.ding.customgraphics.NullCustomGraphics,0,[ Remove Graphics ]," type="string"/>
        <att name="NODE_TRANSPARENCY" value="255" type="string"/>
        <att name="NODE_LABEL_WIDTH" value="200.0" type="string"/>
        <att name="NODE_CUSTOMGRAPHICS_SIZE_1" value="0.0" type="string"/>
        <att name="NODE_CUSTOMGRAPHICS_5" value="org.cytoscape.ding.customgraphics.NullCustomGraphics,0,[ Remove Graphics ]," type="string"/>
        <att name="NODE_CUSTOMGRAPHICS_9" value="org.cytoscape.ding.customgraphics.NullCustomGraphics,0,[ Remove Graphics ]," type="string"/>
        <att name="NODE_CUSTOMGRAPHICS_1" value="org.cytoscape.ding.customgraphics.NullCustomGraphics,0,[ Remove Graphics ]," type="string"/>
        <att name="NODE_CUSTOMGRAPHICS_POSITION_6" value="C,C,c,0.00,0.00" type="string"/>
        <att name="NODE_CUSTOMGRAPHICS_POSITION_2" value="C,C,c,0.00,0.00" type="string"/>
        <att name="NODE_SELECTED_PAINT" value="#FFFF00" type="string"/>
        <att name="NODE_HEIGHT" value="30.0" type="string"/>
        <att name="NODE_CUSTOMGRAPHICS_POSITION_8" value="C,C,c,0.00,0.00" type="string"/>
        <att name="NODE_CUSTOMGRAPHICS_POSITION_9" value="C,C,c,0.00,0.00" type="string"/>
        <att name="NODE_CUSTOMGRAPHICS_POSITION_1" value="C,C,c,0.00,0.00" type="string"/>
        <att name="NODE_BORDER_TRANSPARENCY" value="255" type="string"/>
        <att name="NODE_CUSTOMGRAPHICS_SIZE_3" value="0.0" type="string"/>
        <att name="NODE_CUSTOMGRAPHICS_3" value="org.cytoscape.ding.customgraphics.NullCustomGraphics,0,[ Remove Graphics ]," type="string"/>
        <att name="NODE_CUSTOMGRAPHICS_7" value="org.cytoscape.ding.customgraphics.NullCustomGraphics,0,[ Remove Graphics ]," type="string"/>
        <att name="NODE_CUSTOMGRAPHICS_SIZE_7" value="0.0" type="string"/>
        <att name="NODE_CUSTOMGRAPHICS_SIZE_8" value="0.0" type="string"/>
        <att name="NODE_CUSTOMGRAPHICS_POSITION_5" value="C,C,c,0.00,0.00" type="string"/>
        <att name="NODE_SHAPE" value="ROUND_RECTANGLE" type="string"/>
        <att name="NODE_SELECTED" value="false" type="string"/>
        <att name="NODE_DEPTH" value="0.0" type="string"/>
        <att name="NODE_CUSTOMGRAPHICS_SIZE_5" value="0.0" type="string"/>
        <att name="NODE_FILL_COLOR" value="#C8C8C8" type="string"/>
        <att name="NODE_VISIBLE" value="true" type="string"/>
        <att name="NODE_BORDER_WIDTH" value="0.0" type="string"/>
        <att name="NODE_TOOLTIP" value="" type="string"/>
        <att name="NODE_BORDER_PAINT" value="#006699" type="string"/>
        <att name="NODE_CUSTOMGRAPHICS_6" value="org.cytoscape.ding.customgraphics.NullCustomGraphics,0,[ Remove Graphics ]," type="string"/>
        <att name="NODE_WIDTH" value="80.0" type="string"/>
        <att name="NODE_CUSTOMGRAPHICS_POSITION_3" value="C,C,c,0.00,0.00" type="string"/>
        <att name="NODE_CUSTOMGRAPHICS_4" value="org.cytoscape.ding.customgraphics.NullCustomGraphics,0,[ Remove Graphics ]," type="string"/>
        <att name="NODE_LABEL_POSITION" value="C,C,c,0.00,0.00" type="string"/>
        <att name="NODE_LABEL_TRANSPARENCY" value="255" type="string"/>
        <att name="NODE_CUSTOMGRAPHICS_SIZE_4" value="0.0" type="string"/>
        <att name="NODE_CUSTOMGRAPHICS_2" value="org.cytoscape.ding.customgraphics.NullCustomGraphics,0,[ Remove Graphics ]," type="string"/>
        <att name="NODE_CUSTOMGRAPHICS_POSITION_4" value="C,C,c,0.00,0.00" type="string"/>
        <att name="NODE_LABEL_FONT_FACE" value="Dialog.plain,plain,18" type="string"/>
        <att name="NODE_CUSTOMGRAPHICS_SIZE_9" value="0.0" type="string"/>
        <att name="NODE_LABEL_COLOR" value="#000000" type="string"/>
        <att name="NODE_LABEL_FONT_SIZE" value="18" type="string"/>
        <att name="NODE_LABEL" value="AMOTL1" type="string"/>
      </att>
    </graphics>
  </node>
  <node id="2805" label="YLPM1" cy:nodeId="2077">
    <graphics y="212.08087405315672" z="0.0" x="-683.4728826607104">
      <att name="lockedVisualProperties" type="list">
        <att name="NODE_NESTED_NETWORK_IMAGE_VISIBLE" value="true" type="string"/>
        <att name="NODE_CUSTOMGRAPHICS_SIZE_2" value="0.0" type="string"/>
        <att name="NODE_CUSTOMGRAPHICS_SIZE_6" value="0.0" type="string"/>
        <att name="NODE_BORDER_STROKE" value="SOLID" type="string"/>
        <att name="NODE_CUSTOMGRAPHICS_POSITION_7" value="C,C,c,0.00,0.00" type="string"/>
        <att name="NODE_CUSTOMGRAPHICS_8" value="org.cytoscape.ding.customgraphics.NullCustomGraphics,0,[ Remove Graphics ]," type="string"/>
        <att name="NODE_TRANSPARENCY" value="255" type="string"/>
        <att name="NODE_LABEL_WIDTH" value="200.0" type="string"/>
        <att name="NODE_CUSTOMGRAPHICS_SIZE_1" value="0.0" type="string"/>
        <att name="NODE_CUSTOMGRAPHICS_5" value="org.cytoscape.ding.customgraphics.NullCustomGraphics,0,[ Remove Graphics ]," type="string"/>
        <att name="NODE_CUSTOMGRAPHICS_9" value="org.cytoscape.ding.customgraphics.NullCustomGraphics,0,[ Remove Graphics ]," type="string"/>
        <att name="NODE_CUSTOMGRAPHICS_1" value="org.cytoscape.ding.customgraphics.NullCustomGraphics,0,[ Remove Graphics ]," type="string"/>
        <att name="NODE_CUSTOMGRAPHICS_POSITION_6" value="C,C,c,0.00,0.00" type="string"/>
        <att name="NODE_CUSTOMGRAPHICS_POSITION_2" value="C,C,c,0.00,0.00" type="string"/>
        <att name="NODE_SELECTED_PAINT" value="#FFFF00" type="string"/>
        <att name="NODE_HEIGHT" value="30.0" type="string"/>
        <att name="NODE_CUSTOMGRAPHICS_POSITION_8" value="C,C,c,0.00,0.00" type="string"/>
        <att name="NODE_CUSTOMGRAPHICS_POSITION_9" value="C,C,c,0.00,0.00" type="string"/>
        <att name="NODE_CUSTOMGRAPHICS_POSITION_1" value="C,C,c,0.00,0.00" type="string"/>
        <att name="NODE_BORDER_TRANSPARENCY" value="255" type="string"/>
        <att name="NODE_CUSTOMGRAPHICS_SIZE_3" value="0.0" type="string"/>
        <att name="NODE_CUSTOMGRAPHICS_3" value="org.cytoscape.ding.customgraphics.NullCustomGraphics,0,[ Remove Graphics ]," type="string"/>
        <att name="NODE_CUSTOMGRAPHICS_7" value="org.cytoscape.ding.customgraphics.NullCustomGraphics,0,[ Remove Graphics ]," type="string"/>
        <att name="NODE_CUSTOMGRAPHICS_SIZE_7" value="0.0" type="string"/>
        <att name="NODE_CUSTOMGRAPHICS_SIZE_8" value="0.0" type="string"/>
        <att name="NODE_CUSTOMGRAPHICS_POSITION_5" value="C,C,c,0.00,0.00" type="string"/>
        <att name="NODE_SHAPE" value="ROUND_RECTANGLE" type="string"/>
        <att name="NODE_SELECTED" value="false" type="string"/>
        <att name="NODE_DEPTH" value="0.0" type="string"/>
        <att name="NODE_CUSTOMGRAPHICS_SIZE_5" value="0.0" type="string"/>
        <att name="NODE_FILL_COLOR" value="#C8C8C8" type="string"/>
        <att name="NODE_VISIBLE" value="true" type="string"/>
        <att name="NODE_BORDER_WIDTH" value="0.0" type="string"/>
        <att name="NODE_TOOLTIP" value="" type="string"/>
        <att name="NODE_BORDER_PAINT" value="#006699" type="string"/>
        <att name="NODE_CUSTOMGRAPHICS_6" value="org.cytoscape.ding.customgraphics.NullCustomGraphics,0,[ Remove Graphics ]," type="string"/>
        <att name="NODE_WIDTH" value="80.0" type="string"/>
        <att name="NODE_CUSTOMGRAPHICS_POSITION_3" value="C,C,c,0.00,0.00" type="string"/>
        <att name="NODE_CUSTOMGRAPHICS_4" value="org.cytoscape.ding.customgraphics.NullCustomGraphics,0,[ Remove Graphics ]," type="string"/>
        <att name="NODE_LABEL_POSITION" value="C,C,c,0.00,0.00" type="string"/>
        <att name="NODE_LABEL_TRANSPARENCY" value="255" type="string"/>
        <att name="NODE_CUSTOMGRAPHICS_SIZE_4" value="0.0" type="string"/>
        <att name="NODE_CUSTOMGRAPHICS_2" value="org.cytoscape.ding.customgraphics.NullCustomGraphics,0,[ Remove Graphics ]," type="string"/>
        <att name="NODE_CUSTOMGRAPHICS_POSITION_4" value="C,C,c,0.00,0.00" type="string"/>
        <att name="NODE_LABEL_FONT_FACE" value="Dialog.plain,plain,18" type="string"/>
        <att name="NODE_CUSTOMGRAPHICS_SIZE_9" value="0.0" type="string"/>
        <att name="NODE_LABEL_COLOR" value="#000000" type="string"/>
        <att name="NODE_LABEL_FONT_SIZE" value="18" type="string"/>
        <att name="NODE_LABEL" value="YLPM1" type="string"/>
      </att>
    </graphics>
  </node>
  <node id="2804" label="RADIL" cy:nodeId="2078">
    <graphics y="-1091.26950752602" z="0.0" x="-824.1396484375">
      <att name="lockedVisualProperties" type="list">
        <att name="NODE_NESTED_NETWORK_IMAGE_VISIBLE" value="true" type="string"/>
        <att name="NODE_CUSTOMGRAPHICS_SIZE_2" value="0.0" type="string"/>
        <att name="NODE_CUSTOMGRAPHICS_SIZE_6" value="0.0" type="string"/>
        <att name="NODE_BORDER_STROKE" value="SOLID" type="string"/>
        <att name="NODE_CUSTOMGRAPHICS_POSITION_7" value="C,C,c,0.00,0.00" type="string"/>
        <att name="NODE_CUSTOMGRAPHICS_8" value="org.cytoscape.ding.customgraphics.NullCustomGraphics,0,[ Remove Graphics ]," type="string"/>
        <att name="NODE_TRANSPARENCY" value="255" type="string"/>
        <att name="NODE_LABEL_WIDTH" value="200.0" type="string"/>
        <att name="NODE_CUSTOMGRAPHICS_SIZE_1" value="0.0" type="string"/>
        <att name="NODE_CUSTOMGRAPHICS_5" value="org.cytoscape.ding.customgraphics.NullCustomGraphics,0,[ Remove Graphics ]," type="string"/>
        <att name="NODE_CUSTOMGRAPHICS_9" value="org.cytoscape.ding.customgraphics.NullCustomGraphics,0,[ Remove Graphics ]," type="string"/>
        <att name="NODE_CUSTOMGRAPHICS_1" value="org.cytoscape.ding.customgraphics.NullCustomGraphics,0,[ Remove Graphics ]," type="string"/>
        <att name="NODE_CUSTOMGRAPHICS_POSITION_6" value="C,C,c,0.00,0.00" type="string"/>
        <att name="NODE_CUSTOMGRAPHICS_POSITION_2" value="C,C,c,0.00,0.00" type="string"/>
        <att name="NODE_SELECTED_PAINT" value="#FFFF00" type="string"/>
        <att name="NODE_HEIGHT" value="30.0" type="string"/>
        <att name="NODE_CUSTOMGRAPHICS_POSITION_8" value="C,C,c,0.00,0.00" type="string"/>
        <att name="NODE_CUSTOMGRAPHICS_POSITION_9" value="C,C,c,0.00,0.00" type="string"/>
        <att name="NODE_CUSTOMGRAPHICS_POSITION_1" value="C,C,c,0.00,0.00" type="string"/>
        <att name="NODE_BORDER_TRANSPARENCY" value="255" type="string"/>
        <att name="NODE_CUSTOMGRAPHICS_SIZE_3" value="0.0" type="string"/>
        <att name="NODE_CUSTOMGRAPHICS_3" value="org.cytoscape.ding.customgraphics.NullCustomGraphics,0,[ Remove Graphics ]," type="string"/>
        <att name="NODE_CUSTOMGRAPHICS_7" value="org.cytoscape.ding.customgraphics.NullCustomGraphics,0,[ Remove Graphics ]," type="string"/>
        <att name="NODE_CUSTOMGRAPHICS_SIZE_7" value="0.0" type="string"/>
        <att name="NODE_CUSTOMGRAPHICS_SIZE_8" value="0.0" type="string"/>
        <att name="NODE_CUSTOMGRAPHICS_POSITION_5" value="C,C,c,0.00,0.00" type="string"/>
        <att name="NODE_SHAPE" value="ROUND_RECTANGLE" type="string"/>
        <att name="NODE_SELECTED" value="false" type="string"/>
        <att name="NODE_DEPTH" value="0.0" type="string"/>
        <att name="NODE_CUSTOMGRAPHICS_SIZE_5" value="0.0" type="string"/>
        <att name="NODE_FILL_COLOR" value="#C8C8C8" type="string"/>
        <att name="NODE_VISIBLE" value="true" type="string"/>
        <att name="NODE_BORDER_WIDTH" value="0.0" type="string"/>
        <att name="NODE_TOOLTIP" value="" type="string"/>
        <att name="NODE_BORDER_PAINT" value="#006699" type="string"/>
        <att name="NODE_CUSTOMGRAPHICS_6" value="org.cytoscape.ding.customgraphics.NullCustomGraphics,0,[ Remove Graphics ]," type="string"/>
        <att name="NODE_WIDTH" value="80.0" type="string"/>
        <att name="NODE_CUSTOMGRAPHICS_POSITION_3" value="C,C,c,0.00,0.00" type="string"/>
        <att name="NODE_CUSTOMGRAPHICS_4" value="org.cytoscape.ding.customgraphics.NullCustomGraphics,0,[ Remove Graphics ]," type="string"/>
        <att name="NODE_LABEL_POSITION" value="C,C,c,0.00,0.00" type="string"/>
        <att name="NODE_LABEL_TRANSPARENCY" value="255" type="string"/>
        <att name="NODE_CUSTOMGRAPHICS_SIZE_4" value="0.0" type="string"/>
        <att name="NODE_CUSTOMGRAPHICS_2" value="org.cytoscape.ding.customgraphics.NullCustomGraphics,0,[ Remove Graphics ]," type="string"/>
        <att name="NODE_CUSTOMGRAPHICS_POSITION_4" value="C,C,c,0.00,0.00" type="string"/>
        <att name="NODE_LABEL_FONT_FACE" value="Dialog.plain,plain,18" type="string"/>
        <att name="NODE_CUSTOMGRAPHICS_SIZE_9" value="0.0" type="string"/>
        <att name="NODE_LABEL_COLOR" value="#000000" type="string"/>
        <att name="NODE_LABEL_FONT_SIZE" value="18" type="string"/>
        <att name="NODE_LABEL" value="RADIL" type="string"/>
      </att>
    </graphics>
  </node>
  <node id="2803" label="AMOT" cy:nodeId="2079">
    <graphics y="-81.13760339469815" z="0.0" x="63.689842041587355">
      <att name="lockedVisualProperties" type="list">
        <att name="NODE_NESTED_NETWORK_IMAGE_VISIBLE" value="true" type="string"/>
        <att name="NODE_CUSTOMGRAPHICS_SIZE_2" value="0.0" type="string"/>
        <att name="NODE_CUSTOMGRAPHICS_SIZE_6" value="0.0" type="string"/>
        <att name="NODE_BORDER_STROKE" value="SOLID" type="string"/>
        <att name="NODE_CUSTOMGRAPHICS_POSITION_7" value="C,C,c,0.00,0.00" type="string"/>
        <att name="NODE_CUSTOMGRAPHICS_8" value="org.cytoscape.ding.customgraphics.NullCustomGraphics,0,[ Remove Graphics ]," type="string"/>
        <att name="NODE_TRANSPARENCY" value="255" type="string"/>
        <att name="NODE_LABEL_WIDTH" value="200.0" type="string"/>
        <att name="NODE_CUSTOMGRAPHICS_SIZE_1" value="0.0" type="string"/>
        <att name="NODE_CUSTOMGRAPHICS_5" value="org.cytoscape.ding.customgraphics.NullCustomGraphics,0,[ Remove Graphics ]," type="string"/>
        <att name="NODE_CUSTOMGRAPHICS_9" value="org.cytoscape.ding.customgraphics.NullCustomGraphics,0,[ Remove Graphics ]," type="string"/>
        <att name="NODE_CUSTOMGRAPHICS_1" value="org.cytoscape.ding.customgraphics.NullCustomGraphics,0,[ Remove Graphics ]," type="string"/>
        <att name="NODE_CUSTOMGRAPHICS_POSITION_6" value="C,C,c,0.00,0.00" type="string"/>
        <att name="NODE_CUSTOMGRAPHICS_POSITION_2" value="C,C,c,0.00,0.00" type="string"/>
        <att name="NODE_SELECTED_PAINT" value="#FFFF00" type="string"/>
        <att name="NODE_HEIGHT" value="30.0" type="string"/>
        <att name="NODE_CUSTOMGRAPHICS_POSITION_8" value="C,C,c,0.00,0.00" type="string"/>
        <att name="NODE_CUSTOMGRAPHICS_POSITION_9" value="C,C,c,0.00,0.00" type="string"/>
        <att name="NODE_CUSTOMGRAPHICS_POSITION_1" value="C,C,c,0.00,0.00" type="string"/>
        <att name="NODE_BORDER_TRANSPARENCY" value="255" type="string"/>
        <att name="NODE_CUSTOMGRAPHICS_SIZE_3" value="0.0" type="string"/>
        <att name="NODE_CUSTOMGRAPHICS_3" value="org.cytoscape.ding.customgraphics.NullCustomGraphics,0,[ Remove Graphics ]," type="string"/>
        <att name="NODE_CUSTOMGRAPHICS_7" value="org.cytoscape.ding.customgraphics.NullCustomGraphics,0,[ Remove Graphics ]," type="string"/>
        <att name="NODE_CUSTOMGRAPHICS_SIZE_7" value="0.0" type="string"/>
        <att name="NODE_CUSTOMGRAPHICS_SIZE_8" value="0.0" type="string"/>
        <att name="NODE_CUSTOMGRAPHICS_POSITION_5" value="C,C,c,0.00,0.00" type="string"/>
        <att name="NODE_SHAPE" value="ROUND_RECTANGLE" type="string"/>
        <att name="NODE_SELECTED" value="false" type="string"/>
        <att name="NODE_DEPTH" value="0.0" type="string"/>
        <att name="NODE_CUSTOMGRAPHICS_SIZE_5" value="0.0" type="string"/>
        <att name="NODE_FILL_COLOR" value="#C8C8C8" type="string"/>
        <att name="NODE_VISIBLE" value="true" type="string"/>
        <att name="NODE_BORDER_WIDTH" value="0.0" type="string"/>
        <att name="NODE_TOOLTIP" value="" type="string"/>
        <att name="NODE_BORDER_PAINT" value="#006699" type="string"/>
        <att name="NODE_CUSTOMGRAPHICS_6" value="org.cytoscape.ding.customgraphics.NullCustomGraphics,0,[ Remove Graphics ]," type="string"/>
        <att name="NODE_WIDTH" value="80.0" type="string"/>
        <att name="NODE_CUSTOMGRAPHICS_POSITION_3" value="C,C,c,0.00,0.00" type="string"/>
        <att name="NODE_CUSTOMGRAPHICS_4" value="org.cytoscape.ding.customgraphics.NullCustomGraphics,0,[ Remove Graphics ]," type="string"/>
        <att name="NODE_LABEL_POSITION" value="C,C,c,0.00,0.00" type="string"/>
        <att name="NODE_LABEL_TRANSPARENCY" value="255" type="string"/>
        <att name="NODE_CUSTOMGRAPHICS_SIZE_4" value="0.0" type="string"/>
        <att name="NODE_CUSTOMGRAPHICS_2" value="org.cytoscape.ding.customgraphics.NullCustomGraphics,0,[ Remove Graphics ]," type="string"/>
        <att name="NODE_CUSTOMGRAPHICS_POSITION_4" value="C,C,c,0.00,0.00" type="string"/>
        <att name="NODE_LABEL_FONT_FACE" value="Dialog.plain,plain,18" type="string"/>
        <att name="NODE_CUSTOMGRAPHICS_SIZE_9" value="0.0" type="string"/>
        <att name="NODE_LABEL_COLOR" value="#000000" type="string"/>
        <att name="NODE_LABEL_FONT_SIZE" value="18" type="string"/>
        <att name="NODE_LABEL" value="AMOT" type="string"/>
      </att>
    </graphics>
  </node>
  <node id="2802" label="LNX2" cy:nodeId="2080">
    <graphics y="-1258.36865234375" z="0.0" x="-827.7693600065212">
      <att name="lockedVisualProperties" type="list">
        <att name="NODE_NESTED_NETWORK_IMAGE_VISIBLE" value="true" type="string"/>
        <att name="NODE_CUSTOMGRAPHICS_SIZE_2" value="0.0" type="string"/>
        <att name="NODE_CUSTOMGRAPHICS_SIZE_6" value="0.0" type="string"/>
        <att name="NODE_BORDER_STROKE" value="SOLID" type="string"/>
        <att name="NODE_CUSTOMGRAPHICS_POSITION_7" value="C,C,c,0.00,0.00" type="string"/>
        <att name="NODE_CUSTOMGRAPHICS_8" value="org.cytoscape.ding.customgraphics.NullCustomGraphics,0,[ Remove Graphics ]," type="string"/>
        <att name="NODE_TRANSPARENCY" value="255" type="string"/>
        <att name="NODE_LABEL_WIDTH" value="200.0" type="string"/>
        <att name="NODE_CUSTOMGRAPHICS_SIZE_1" value="0.0" type="string"/>
        <att name="NODE_CUSTOMGRAPHICS_5" value="org.cytoscape.ding.customgraphics.NullCustomGraphics,0,[ Remove Graphics ]," type="string"/>
        <att name="NODE_CUSTOMGRAPHICS_9" value="org.cytoscape.ding.customgraphics.NullCustomGraphics,0,[ Remove Graphics ]," type="string"/>
        <att name="NODE_CUSTOMGRAPHICS_1" value="org.cytoscape.ding.customgraphics.NullCustomGraphics,0,[ Remove Graphics ]," type="string"/>
        <att name="NODE_CUSTOMGRAPHICS_POSITION_6" value="C,C,c,0.00,0.00" type="string"/>
        <att name="NODE_CUSTOMGRAPHICS_POSITION_2" value="C,C,c,0.00,0.00" type="string"/>
        <att name="NODE_SELECTED_PAINT" value="#FFFF00" type="string"/>
        <att name="NODE_HEIGHT" value="30.0" type="string"/>
        <att name="NODE_CUSTOMGRAPHICS_POSITION_8" value="C,C,c,0.00,0.00" type="string"/>
        <att name="NODE_CUSTOMGRAPHICS_POSITION_9" value="C,C,c,0.00,0.00" type="string"/>
        <att name="NODE_CUSTOMGRAPHICS_POSITION_1" value="C,C,c,0.00,0.00" type="string"/>
        <att name="NODE_BORDER_TRANSPARENCY" value="255" type="string"/>
        <att name="NODE_CUSTOMGRAPHICS_SIZE_3" value="0.0" type="string"/>
        <att name="NODE_CUSTOMGRAPHICS_3" value="org.cytoscape.ding.customgraphics.NullCustomGraphics,0,[ Remove Graphics ]," type="string"/>
        <att name="NODE_CUSTOMGRAPHICS_7" value="org.cytoscape.ding.customgraphics.NullCustomGraphics,0,[ Remove Graphics ]," type="string"/>
        <att name="NODE_CUSTOMGRAPHICS_SIZE_7" value="0.0" type="string"/>
        <att name="NODE_CUSTOMGRAPHICS_SIZE_8" value="0.0" type="string"/>
        <att name="NODE_CUSTOMGRAPHICS_POSITION_5" value="C,C,c,0.00,0.00" type="string"/>
        <att name="NODE_SHAPE" value="ROUND_RECTANGLE" type="string"/>
        <att name="NODE_SELECTED" value="false" type="string"/>
        <att name="NODE_DEPTH" value="0.0" type="string"/>
        <att name="NODE_CUSTOMGRAPHICS_SIZE_5" value="0.0" type="string"/>
        <att name="NODE_FILL_COLOR" value="#C8C8C8" type="string"/>
        <att name="NODE_VISIBLE" value="true" type="string"/>
        <att name="NODE_BORDER_WIDTH" value="0.0" type="string"/>
        <att name="NODE_TOOLTIP" value="" type="string"/>
        <att name="NODE_BORDER_PAINT" value="#006699" type="string"/>
        <att name="NODE_CUSTOMGRAPHICS_6" value="org.cytoscape.ding.customgraphics.NullCustomGraphics,0,[ Remove Graphics ]," type="string"/>
        <att name="NODE_WIDTH" value="80.0" type="string"/>
        <att name="NODE_CUSTOMGRAPHICS_POSITION_3" value="C,C,c,0.00,0.00" type="string"/>
        <att name="NODE_CUSTOMGRAPHICS_4" value="org.cytoscape.ding.customgraphics.NullCustomGraphics,0,[ Remove Graphics ]," type="string"/>
        <att name="NODE_LABEL_POSITION" value="C,C,c,0.00,0.00" type="string"/>
        <att name="NODE_LABEL_TRANSPARENCY" value="255" type="string"/>
        <att name="NODE_CUSTOMGRAPHICS_SIZE_4" value="0.0" type="string"/>
        <att name="NODE_CUSTOMGRAPHICS_2" value="org.cytoscape.ding.customgraphics.NullCustomGraphics,0,[ Remove Graphics ]," type="string"/>
        <att name="NODE_CUSTOMGRAPHICS_POSITION_4" value="C,C,c,0.00,0.00" type="string"/>
        <att name="NODE_LABEL_FONT_FACE" value="Dialog.plain,plain,18" type="string"/>
        <att name="NODE_CUSTOMGRAPHICS_SIZE_9" value="0.0" type="string"/>
        <att name="NODE_LABEL_COLOR" value="#000000" type="string"/>
        <att name="NODE_LABEL_FONT_SIZE" value="18" type="string"/>
        <att name="NODE_LABEL" value="LNX2" type="string"/>
      </att>
    </graphics>
  </node>
  <node id="2801" label="F10" cy:nodeId="2081">
    <graphics y="-1228.98828125" z="0.0" x="-728.2035013477209">
      <att name="lockedVisualProperties" type="list">
        <att name="NODE_NESTED_NETWORK_IMAGE_VISIBLE" value="true" type="string"/>
        <att name="NODE_CUSTOMGRAPHICS_SIZE_2" value="0.0" type="string"/>
        <att name="NODE_CUSTOMGRAPHICS_SIZE_6" value="0.0" type="string"/>
        <att name="NODE_BORDER_STROKE" value="SOLID" type="string"/>
        <att name="NODE_CUSTOMGRAPHICS_POSITION_7" value="C,C,c,0.00,0.00" type="string"/>
        <att name="NODE_CUSTOMGRAPHICS_8" value="org.cytoscape.ding.customgraphics.NullCustomGraphics,0,[ Remove Graphics ]," type="string"/>
        <att name="NODE_TRANSPARENCY" value="255" type="string"/>
        <att name="NODE_LABEL_WIDTH" value="200.0" type="string"/>
        <att name="NODE_CUSTOMGRAPHICS_SIZE_1" value="0.0" type="string"/>
        <att name="NODE_CUSTOMGRAPHICS_5" value="org.cytoscape.ding.customgraphics.NullCustomGraphics,0,[ Remove Graphics ]," type="string"/>
        <att name="NODE_CUSTOMGRAPHICS_9" value="org.cytoscape.ding.customgraphics.NullCustomGraphics,0,[ Remove Graphics ]," type="string"/>
        <att name="NODE_CUSTOMGRAPHICS_1" value="org.cytoscape.ding.customgraphics.NullCustomGraphics,0,[ Remove Graphics ]," type="string"/>
        <att name="NODE_CUSTOMGRAPHICS_POSITION_6" value="C,C,c,0.00,0.00" type="string"/>
        <att name="NODE_CUSTOMGRAPHICS_POSITION_2" value="C,C,c,0.00,0.00" type="string"/>
        <att name="NODE_SELECTED_PAINT" value="#FFFF00" type="string"/>
        <att name="NODE_HEIGHT" value="30.0" type="string"/>
        <att name="NODE_CUSTOMGRAPHICS_POSITION_8" value="C,C,c,0.00,0.00" type="string"/>
        <att name="NODE_CUSTOMGRAPHICS_POSITION_9" value="C,C,c,0.00,0.00" type="string"/>
        <att name="NODE_CUSTOMGRAPHICS_POSITION_1" value="C,C,c,0.00,0.00" type="string"/>
        <att name="NODE_BORDER_TRANSPARENCY" value="255" type="string"/>
        <att name="NODE_CUSTOMGRAPHICS_SIZE_3" value="0.0" type="string"/>
        <att name="NODE_CUSTOMGRAPHICS_3" value="org.cytoscape.ding.customgraphics.NullCustomGraphics,0,[ Remove Graphics ]," type="string"/>
        <att name="NODE_CUSTOMGRAPHICS_7" value="org.cytoscape.ding.customgraphics.NullCustomGraphics,0,[ Remove Graphics ]," type="string"/>
        <att name="NODE_CUSTOMGRAPHICS_SIZE_7" value="0.0" type="string"/>
        <att name="NODE_CUSTOMGRAPHICS_SIZE_8" value="0.0" type="string"/>
        <att name="NODE_CUSTOMGRAPHICS_POSITION_5" value="C,C,c,0.00,0.00" type="string"/>
        <att name="NODE_SHAPE" value="ROUND_RECTANGLE" type="string"/>
        <att name="NODE_SELECTED" value="false" type="string"/>
        <att name="NODE_DEPTH" value="0.0" type="string"/>
        <att name="NODE_CUSTOMGRAPHICS_SIZE_5" value="0.0" type="string"/>
        <att name="NODE_FILL_COLOR" value="#C8C8C8" type="string"/>
        <att name="NODE_VISIBLE" value="true" type="string"/>
        <att name="NODE_BORDER_WIDTH" value="0.0" type="string"/>
        <att name="NODE_TOOLTIP" value="" type="string"/>
        <att name="NODE_BORDER_PAINT" value="#006699" type="string"/>
        <att name="NODE_CUSTOMGRAPHICS_6" value="org.cytoscape.ding.customgraphics.NullCustomGraphics,0,[ Remove Graphics ]," type="string"/>
        <att name="NODE_WIDTH" value="80.0" type="string"/>
        <att name="NODE_CUSTOMGRAPHICS_POSITION_3" value="C,C,c,0.00,0.00" type="string"/>
        <att name="NODE_CUSTOMGRAPHICS_4" value="org.cytoscape.ding.customgraphics.NullCustomGraphics,0,[ Remove Graphics ]," type="string"/>
        <att name="NODE_LABEL_POSITION" value="C,C,c,0.00,0.00" type="string"/>
        <att name="NODE_LABEL_TRANSPARENCY" value="255" type="string"/>
        <att name="NODE_CUSTOMGRAPHICS_SIZE_4" value="0.0" type="string"/>
        <att name="NODE_CUSTOMGRAPHICS_2" value="org.cytoscape.ding.customgraphics.NullCustomGraphics,0,[ Remove Graphics ]," type="string"/>
        <att name="NODE_CUSTOMGRAPHICS_POSITION_4" value="C,C,c,0.00,0.00" type="string"/>
        <att name="NODE_LABEL_FONT_FACE" value="Dialog.plain,plain,18" type="string"/>
        <att name="NODE_CUSTOMGRAPHICS_SIZE_9" value="0.0" type="string"/>
        <att name="NODE_LABEL_COLOR" value="#000000" type="string"/>
        <att name="NODE_LABEL_FONT_SIZE" value="18" type="string"/>
        <att name="NODE_LABEL" value="F10" type="string"/>
      </att>
    </graphics>
  </node>
  <node id="2800" label="THAP4" cy:nodeId="2082">
    <graphics y="-1449.9872763928738" z="0.0" x="990.054443359375">
      <att name="lockedVisualProperties" type="list">
        <att name="NODE_NESTED_NETWORK_IMAGE_VISIBLE" value="true" type="string"/>
        <att name="NODE_CUSTOMGRAPHICS_SIZE_2" value="0.0" type="string"/>
        <att name="NODE_CUSTOMGRAPHICS_SIZE_6" value="0.0" type="string"/>
        <att name="NODE_BORDER_STROKE" value="SOLID" type="string"/>
        <att name="NODE_CUSTOMGRAPHICS_POSITION_7" value="C,C,c,0.00,0.00" type="string"/>
        <att name="NODE_CUSTOMGRAPHICS_8" value="org.cytoscape.ding.customgraphics.NullCustomGraphics,0,[ Remove Graphics ]," type="string"/>
        <att name="NODE_TRANSPARENCY" value="255" type="string"/>
        <att name="NODE_LABEL_WIDTH" value="200.0" type="string"/>
        <att name="NODE_CUSTOMGRAPHICS_SIZE_1" value="0.0" type="string"/>
        <att name="NODE_CUSTOMGRAPHICS_5" value="org.cytoscape.ding.customgraphics.NullCustomGraphics,0,[ Remove Graphics ]," type="string"/>
        <att name="NODE_CUSTOMGRAPHICS_9" value="org.cytoscape.ding.customgraphics.NullCustomGraphics,0,[ Remove Graphics ]," type="string"/>
        <att name="NODE_CUSTOMGRAPHICS_1" value="org.cytoscape.ding.customgraphics.NullCustomGraphics,0,[ Remove Graphics ]," type="string"/>
        <att name="NODE_CUSTOMGRAPHICS_POSITION_6" value="C,C,c,0.00,0.00" type="string"/>
        <att name="NODE_CUSTOMGRAPHICS_POSITION_2" value="C,C,c,0.00,0.00" type="string"/>
        <att name="NODE_SELECTED_PAINT" value="#FFFF00" type="string"/>
        <att name="NODE_HEIGHT" value="30.0" type="string"/>
        <att name="NODE_CUSTOMGRAPHICS_POSITION_8" value="C,C,c,0.00,0.00" type="string"/>
        <att name="NODE_CUSTOMGRAPHICS_POSITION_9" value="C,C,c,0.00,0.00" type="string"/>
        <att name="NODE_CUSTOMGRAPHICS_POSITION_1" value="C,C,c,0.00,0.00" type="string"/>
        <att name="NODE_BORDER_TRANSPARENCY" value="255" type="string"/>
        <att name="NODE_CUSTOMGRAPHICS_SIZE_3" value="0.0" type="string"/>
        <att name="NODE_CUSTOMGRAPHICS_3" value="org.cytoscape.ding.customgraphics.NullCustomGraphics,0,[ Remove Graphics ]," type="string"/>
        <att name="NODE_CUSTOMGRAPHICS_7" value="org.cytoscape.ding.customgraphics.NullCustomGraphics,0,[ Remove Graphics ]," type="string"/>
        <att name="NODE_CUSTOMGRAPHICS_SIZE_7" value="0.0" type="string"/>
        <att name="NODE_CUSTOMGRAPHICS_SIZE_8" value="0.0" type="string"/>
        <att name="NODE_CUSTOMGRAPHICS_POSITION_5" value="C,C,c,0.00,0.00" type="string"/>
        <att name="NODE_SHAPE" value="ROUND_RECTANGLE" type="string"/>
        <att name="NODE_SELECTED" value="false" type="string"/>
        <att name="NODE_DEPTH" value="0.0" type="string"/>
        <att name="NODE_CUSTOMGRAPHICS_SIZE_5" value="0.0" type="string"/>
        <att name="NODE_FILL_COLOR" value="#C8C8C8" type="string"/>
        <att name="NODE_VISIBLE" value="true" type="string"/>
        <att name="NODE_BORDER_WIDTH" value="0.0" type="string"/>
        <att name="NODE_TOOLTIP" value="" type="string"/>
        <att name="NODE_BORDER_PAINT" value="#006699" type="string"/>
        <att name="NODE_CUSTOMGRAPHICS_6" value="org.cytoscape.ding.customgraphics.NullCustomGraphics,0,[ Remove Graphics ]," type="string"/>
        <att name="NODE_WIDTH" value="80.0" type="string"/>
        <att name="NODE_CUSTOMGRAPHICS_POSITION_3" value="C,C,c,0.00,0.00" type="string"/>
        <att name="NODE_CUSTOMGRAPHICS_4" value="org.cytoscape.ding.customgraphics.NullCustomGraphics,0,[ Remove Graphics ]," type="string"/>
        <att name="NODE_LABEL_POSITION" value="C,C,c,0.00,0.00" type="string"/>
        <att name="NODE_LABEL_TRANSPARENCY" value="255" type="string"/>
        <att name="NODE_CUSTOMGRAPHICS_SIZE_4" value="0.0" type="string"/>
        <att name="NODE_CUSTOMGRAPHICS_2" value="org.cytoscape.ding.customgraphics.NullCustomGraphics,0,[ Remove Graphics ]," type="string"/>
        <att name="NODE_CUSTOMGRAPHICS_POSITION_4" value="C,C,c,0.00,0.00" type="string"/>
        <att name="NODE_LABEL_FONT_FACE" value="Dialog.plain,plain,18" type="string"/>
        <att name="NODE_CUSTOMGRAPHICS_SIZE_9" value="0.0" type="string"/>
        <att name="NODE_LABEL_COLOR" value="#000000" type="string"/>
        <att name="NODE_LABEL_FONT_SIZE" value="18" type="string"/>
        <att name="NODE_LABEL" value="THAP4" type="string"/>
      </att>
    </graphics>
  </node>
  <node id="2799" label="TAB2" cy:nodeId="2083">
    <graphics y="-985.4942210984145" z="0.0" x="84.34794198752289">
      <att name="lockedVisualProperties" type="list">
        <att name="NODE_NESTED_NETWORK_IMAGE_VISIBLE" value="true" type="string"/>
        <att name="NODE_CUSTOMGRAPHICS_SIZE_2" value="0.0" type="string"/>
        <att name="NODE_CUSTOMGRAPHICS_SIZE_6" value="0.0" type="string"/>
        <att name="NODE_BORDER_STROKE" value="SOLID" type="string"/>
        <att name="NODE_CUSTOMGRAPHICS_POSITION_7" value="C,C,c,0.00,0.00" type="string"/>
        <att name="NODE_CUSTOMGRAPHICS_8" value="org.cytoscape.ding.customgraphics.NullCustomGraphics,0,[ Remove Graphics ]," type="string"/>
        <att name="NODE_TRANSPARENCY" value="255" type="string"/>
        <att name="NODE_LABEL_WIDTH" value="200.0" type="string"/>
        <att name="NODE_CUSTOMGRAPHICS_SIZE_1" value="0.0" type="string"/>
        <att name="NODE_CUSTOMGRAPHICS_5" value="org.cytoscape.ding.customgraphics.NullCustomGraphics,0,[ Remove Graphics ]," type="string"/>
        <att name="NODE_CUSTOMGRAPHICS_9" value="org.cytoscape.ding.customgraphics.NullCustomGraphics,0,[ Remove Graphics ]," type="string"/>
        <att name="NODE_CUSTOMGRAPHICS_1" value="org.cytoscape.ding.customgraphics.NullCustomGraphics,0,[ Remove Graphics ]," type="string"/>
        <att name="NODE_CUSTOMGRAPHICS_POSITION_6" value="C,C,c,0.00,0.00" type="string"/>
        <att name="NODE_CUSTOMGRAPHICS_POSITION_2" value="C,C,c,0.00,0.00" type="string"/>
        <att name="NODE_SELECTED_PAINT" value="#FFFF00" type="string"/>
        <att name="NODE_HEIGHT" value="30.0" type="string"/>
        <att name="NODE_CUSTOMGRAPHICS_POSITION_8" value="C,C,c,0.00,0.00" type="string"/>
        <att name="NODE_CUSTOMGRAPHICS_POSITION_9" value="C,C,c,0.00,0.00" type="string"/>
        <att name="NODE_CUSTOMGRAPHICS_POSITION_1" value="C,C,c,0.00,0.00" type="string"/>
        <att name="NODE_BORDER_TRANSPARENCY" value="255" type="string"/>
        <att name="NODE_CUSTOMGRAPHICS_SIZE_3" value="0.0" type="string"/>
        <att name="NODE_CUSTOMGRAPHICS_3" value="org.cytoscape.ding.customgraphics.NullCustomGraphics,0,[ Remove Graphics ]," type="string"/>
        <att name="NODE_CUSTOMGRAPHICS_7" value="org.cytoscape.ding.customgraphics.NullCustomGraphics,0,[ Remove Graphics ]," type="string"/>
        <att name="NODE_CUSTOMGRAPHICS_SIZE_7" value="0.0" type="string"/>
        <att name="NODE_CUSTOMGRAPHICS_SIZE_8" value="0.0" type="string"/>
        <att name="NODE_CUSTOMGRAPHICS_POSITION_5" value="C,C,c,0.00,0.00" type="string"/>
        <att name="NODE_SHAPE" value="ROUND_RECTANGLE" type="string"/>
        <att name="NODE_SELECTED" value="false" type="string"/>
        <att name="NODE_DEPTH" value="0.0" type="string"/>
        <att name="NODE_CUSTOMGRAPHICS_SIZE_5" value="0.0" type="string"/>
        <att name="NODE_FILL_COLOR" value="#FF9F1C" type="string"/>
        <att name="NODE_VISIBLE" value="true" type="string"/>
        <att name="NODE_BORDER_WIDTH" value="0.0" type="string"/>
        <att name="NODE_TOOLTIP" value="" type="string"/>
        <att name="NODE_BORDER_PAINT" value="#006699" type="string"/>
        <att name="NODE_CUSTOMGRAPHICS_6" value="org.cytoscape.ding.customgraphics.NullCustomGraphics,0,[ Remove Graphics ]," type="string"/>
        <att name="NODE_WIDTH" value="80.0" type="string"/>
        <att name="NODE_CUSTOMGRAPHICS_POSITION_3" value="C,C,c,0.00,0.00" type="string"/>
        <att name="NODE_CUSTOMGRAPHICS_4" value="org.cytoscape.ding.customgraphics.NullCustomGraphics,0,[ Remove Graphics ]," type="string"/>
        <att name="NODE_LABEL_POSITION" value="C,C,c,0.00,0.00" type="string"/>
        <att name="NODE_LABEL_TRANSPARENCY" value="255" type="string"/>
        <att name="NODE_CUSTOMGRAPHICS_SIZE_4" value="0.0" type="string"/>
        <att name="NODE_CUSTOMGRAPHICS_2" value="org.cytoscape.ding.customgraphics.NullCustomGraphics,0,[ Remove Graphics ]," type="string"/>
        <att name="NODE_CUSTOMGRAPHICS_POSITION_4" value="C,C,c,0.00,0.00" type="string"/>
        <att name="NODE_LABEL_FONT_FACE" value="Dialog.plain,plain,18" type="string"/>
        <att name="NODE_CUSTOMGRAPHICS_SIZE_9" value="0.0" type="string"/>
        <att name="NODE_LABEL_COLOR" value="#000000" type="string"/>
        <att name="NODE_LABEL_FONT_SIZE" value="18" type="string"/>
        <att name="NODE_LABEL" value="TAB2" type="string"/>
      </att>
    </graphics>
  </node>
  <node id="2798" label="CHST12" cy:nodeId="2084">
    <graphics y="-1447.8308388415014" z="0.0" x="689.7572631835938">
      <att name="lockedVisualProperties" type="list">
        <att name="NODE_NESTED_NETWORK_IMAGE_VISIBLE" value="true" type="string"/>
        <att name="NODE_CUSTOMGRAPHICS_SIZE_2" value="0.0" type="string"/>
        <att name="NODE_CUSTOMGRAPHICS_SIZE_6" value="0.0" type="string"/>
        <att name="NODE_BORDER_STROKE" value="SOLID" type="string"/>
        <att name="NODE_CUSTOMGRAPHICS_POSITION_7" value="C,C,c,0.00,0.00" type="string"/>
        <att name="NODE_CUSTOMGRAPHICS_8" value="org.cytoscape.ding.customgraphics.NullCustomGraphics,0,[ Remove Graphics ]," type="string"/>
        <att name="NODE_TRANSPARENCY" value="255" type="string"/>
        <att name="NODE_LABEL_WIDTH" value="200.0" type="string"/>
        <att name="NODE_CUSTOMGRAPHICS_SIZE_1" value="0.0" type="string"/>
        <att name="NODE_CUSTOMGRAPHICS_5" value="org.cytoscape.ding.customgraphics.NullCustomGraphics,0,[ Remove Graphics ]," type="string"/>
        <att name="NODE_CUSTOMGRAPHICS_9" value="org.cytoscape.ding.customgraphics.NullCustomGraphics,0,[ Remove Graphics ]," type="string"/>
        <att name="NODE_CUSTOMGRAPHICS_1" value="org.cytoscape.ding.customgraphics.NullCustomGraphics,0,[ Remove Graphics ]," type="string"/>
        <att name="NODE_CUSTOMGRAPHICS_POSITION_6" value="C,C,c,0.00,0.00" type="string"/>
        <att name="NODE_CUSTOMGRAPHICS_POSITION_2" value="C,C,c,0.00,0.00" type="string"/>
        <att name="NODE_SELECTED_PAINT" value="#FFFF00" type="string"/>
        <att name="NODE_HEIGHT" value="30.0" type="string"/>
        <att name="NODE_CUSTOMGRAPHICS_POSITION_8" value="C,C,c,0.00,0.00" type="string"/>
        <att name="NODE_CUSTOMGRAPHICS_POSITION_9" value="C,C,c,0.00,0.00" type="string"/>
        <att name="NODE_CUSTOMGRAPHICS_POSITION_1" value="C,C,c,0.00,0.00" type="string"/>
        <att name="NODE_BORDER_TRANSPARENCY" value="255" type="string"/>
        <att name="NODE_CUSTOMGRAPHICS_SIZE_3" value="0.0" type="string"/>
        <att name="NODE_CUSTOMGRAPHICS_3" value="org.cytoscape.ding.customgraphics.NullCustomGraphics,0,[ Remove Graphics ]," type="string"/>
        <att name="NODE_CUSTOMGRAPHICS_7" value="org.cytoscape.ding.customgraphics.NullCustomGraphics,0,[ Remove Graphics ]," type="string"/>
        <att name="NODE_CUSTOMGRAPHICS_SIZE_7" value="0.0" type="string"/>
        <att name="NODE_CUSTOMGRAPHICS_SIZE_8" value="0.0" type="string"/>
        <att name="NODE_CUSTOMGRAPHICS_POSITION_5" value="C,C,c,0.00,0.00" type="string"/>
        <att name="NODE_SHAPE" value="ROUND_RECTANGLE" type="string"/>
        <att name="NODE_SELECTED" value="false" type="string"/>
        <att name="NODE_DEPTH" value="0.0" type="string"/>
        <att name="NODE_CUSTOMGRAPHICS_SIZE_5" value="0.0" type="string"/>
        <att name="NODE_FILL_COLOR" value="#C8C8C8" type="string"/>
        <att name="NODE_VISIBLE" value="true" type="string"/>
        <att name="NODE_BORDER_WIDTH" value="0.0" type="string"/>
        <att name="NODE_TOOLTIP" value="" type="string"/>
        <att name="NODE_BORDER_PAINT" value="#006699" type="string"/>
        <att name="NODE_CUSTOMGRAPHICS_6" value="org.cytoscape.ding.customgraphics.NullCustomGraphics,0,[ Remove Graphics ]," type="string"/>
        <att name="NODE_WIDTH" value="80.0" type="string"/>
        <att name="NODE_CUSTOMGRAPHICS_POSITION_3" value="C,C,c,0.00,0.00" type="string"/>
        <att name="NODE_CUSTOMGRAPHICS_4" value="org.cytoscape.ding.customgraphics.NullCustomGraphics,0,[ Remove Graphics ]," type="string"/>
        <att name="NODE_LABEL_POSITION" value="C,C,c,0.00,0.00" type="string"/>
        <att name="NODE_LABEL_TRANSPARENCY" value="255" type="string"/>
        <att name="NODE_CUSTOMGRAPHICS_SIZE_4" value="0.0" type="string"/>
        <att name="NODE_CUSTOMGRAPHICS_2" value="org.cytoscape.ding.customgraphics.NullCustomGraphics,0,[ Remove Graphics ]," type="string"/>
        <att name="NODE_CUSTOMGRAPHICS_POSITION_4" value="C,C,c,0.00,0.00" type="string"/>
        <att name="NODE_LABEL_FONT_FACE" value="Dialog.plain,plain,18" type="string"/>
        <att name="NODE_CUSTOMGRAPHICS_SIZE_9" value="0.0" type="string"/>
        <att name="NODE_LABEL_COLOR" value="#000000" type="string"/>
        <att name="NODE_LABEL_FONT_SIZE" value="18" type="string"/>
        <att name="NODE_LABEL" value="CHST12" type="string"/>
      </att>
    </graphics>
  </node>
  <node id="2797" label="MAP3K7" cy:nodeId="2085">
    <graphics y="-949.8828929734145" z="0.0" x="82.81803476096039">
      <att name="lockedVisualProperties" type="list">
        <att name="NODE_NESTED_NETWORK_IMAGE_VISIBLE" value="true" type="string"/>
        <att name="NODE_CUSTOMGRAPHICS_SIZE_2" value="0.0" type="string"/>
        <att name="NODE_CUSTOMGRAPHICS_SIZE_6" value="0.0" type="string"/>
        <att name="NODE_BORDER_STROKE" value="SOLID" type="string"/>
        <att name="NODE_CUSTOMGRAPHICS_POSITION_7" value="C,C,c,0.00,0.00" type="string"/>
        <att name="NODE_CUSTOMGRAPHICS_8" value="org.cytoscape.ding.customgraphics.NullCustomGraphics,0,[ Remove Graphics ]," type="string"/>
        <att name="NODE_TRANSPARENCY" value="255" type="string"/>
        <att name="NODE_LABEL_WIDTH" value="200.0" type="string"/>
        <att name="NODE_CUSTOMGRAPHICS_SIZE_1" value="0.0" type="string"/>
        <att name="NODE_CUSTOMGRAPHICS_5" value="org.cytoscape.ding.customgraphics.NullCustomGraphics,0,[ Remove Graphics ]," type="string"/>
        <att name="NODE_CUSTOMGRAPHICS_9" value="org.cytoscape.ding.customgraphics.NullCustomGraphics,0,[ Remove Graphics ]," type="string"/>
        <att name="NODE_CUSTOMGRAPHICS_1" value="org.cytoscape.ding.customgraphics.NullCustomGraphics,0,[ Remove Graphics ]," type="string"/>
        <att name="NODE_CUSTOMGRAPHICS_POSITION_6" value="C,C,c,0.00,0.00" type="string"/>
        <att name="NODE_CUSTOMGRAPHICS_POSITION_2" value="C,C,c,0.00,0.00" type="string"/>
        <att name="NODE_SELECTED_PAINT" value="#FFFF00" type="string"/>
        <att name="NODE_HEIGHT" value="30.0" type="string"/>
        <att name="NODE_CUSTOMGRAPHICS_POSITION_8" value="C,C,c,0.00,0.00" type="string"/>
        <att name="NODE_CUSTOMGRAPHICS_POSITION_9" value="C,C,c,0.00,0.00" type="string"/>
        <att name="NODE_CUSTOMGRAPHICS_POSITION_1" value="C,C,c,0.00,0.00" type="string"/>
        <att name="NODE_BORDER_TRANSPARENCY" value="255" type="string"/>
        <att name="NODE_CUSTOMGRAPHICS_SIZE_3" value="0.0" type="string"/>
        <att name="NODE_CUSTOMGRAPHICS_3" value="org.cytoscape.ding.customgraphics.NullCustomGraphics,0,[ Remove Graphics ]," type="string"/>
        <att name="NODE_CUSTOMGRAPHICS_7" value="org.cytoscape.ding.customgraphics.NullCustomGraphics,0,[ Remove Graphics ]," type="string"/>
        <att name="NODE_CUSTOMGRAPHICS_SIZE_7" value="0.0" type="string"/>
        <att name="NODE_CUSTOMGRAPHICS_SIZE_8" value="0.0" type="string"/>
        <att name="NODE_CUSTOMGRAPHICS_POSITION_5" value="C,C,c,0.00,0.00" type="string"/>
        <att name="NODE_SHAPE" value="ROUND_RECTANGLE" type="string"/>
        <att name="NODE_SELECTED" value="false" type="string"/>
        <att name="NODE_DEPTH" value="0.0" type="string"/>
        <att name="NODE_CUSTOMGRAPHICS_SIZE_5" value="0.0" type="string"/>
        <att name="NODE_FILL_COLOR" value="#FF9F1C" type="string"/>
        <att name="NODE_VISIBLE" value="true" type="string"/>
        <att name="NODE_BORDER_WIDTH" value="0.0" type="string"/>
        <att name="NODE_TOOLTIP" value="" type="string"/>
        <att name="NODE_BORDER_PAINT" value="#006699" type="string"/>
        <att name="NODE_CUSTOMGRAPHICS_6" value="org.cytoscape.ding.customgraphics.NullCustomGraphics,0,[ Remove Graphics ]," type="string"/>
        <att name="NODE_WIDTH" value="80.0" type="string"/>
        <att name="NODE_CUSTOMGRAPHICS_POSITION_3" value="C,C,c,0.00,0.00" type="string"/>
        <att name="NODE_CUSTOMGRAPHICS_4" value="org.cytoscape.ding.customgraphics.NullCustomGraphics,0,[ Remove Graphics ]," type="string"/>
        <att name="NODE_LABEL_POSITION" value="C,C,c,0.00,0.00" type="string"/>
        <att name="NODE_LABEL_TRANSPARENCY" value="255" type="string"/>
        <att name="NODE_CUSTOMGRAPHICS_SIZE_4" value="0.0" type="string"/>
        <att name="NODE_CUSTOMGRAPHICS_2" value="org.cytoscape.ding.customgraphics.NullCustomGraphics,0,[ Remove Graphics ]," type="string"/>
        <att name="NODE_CUSTOMGRAPHICS_POSITION_4" value="C,C,c,0.00,0.00" type="string"/>
        <att name="NODE_LABEL_FONT_FACE" value="Dialog.plain,plain,18" type="string"/>
        <att name="NODE_CUSTOMGRAPHICS_SIZE_9" value="0.0" type="string"/>
        <att name="NODE_LABEL_COLOR" value="#000000" type="string"/>
        <att name="NODE_LABEL_FONT_SIZE" value="18" type="string"/>
        <att name="NODE_LABEL" value="MAP3K7" type="string"/>
      </att>
    </graphics>
  </node>
  <node id="2796" label="SEPSECS" cy:nodeId="2086">
    <graphics y="-270.8226318359375" z="0.0" x="-853.0750796427903">
      <att name="lockedVisualProperties" type="list">
        <att name="NODE_NESTED_NETWORK_IMAGE_VISIBLE" value="true" type="string"/>
        <att name="NODE_CUSTOMGRAPHICS_SIZE_2" value="0.0" type="string"/>
        <att name="NODE_CUSTOMGRAPHICS_SIZE_6" value="0.0" type="string"/>
        <att name="NODE_BORDER_STROKE" value="SOLID" type="string"/>
        <att name="NODE_CUSTOMGRAPHICS_POSITION_7" value="C,C,c,0.00,0.00" type="string"/>
        <att name="NODE_CUSTOMGRAPHICS_8" value="org.cytoscape.ding.customgraphics.NullCustomGraphics,0,[ Remove Graphics ]," type="string"/>
        <att name="NODE_TRANSPARENCY" value="255" type="string"/>
        <att name="NODE_LABEL_WIDTH" value="200.0" type="string"/>
        <att name="NODE_CUSTOMGRAPHICS_SIZE_1" value="0.0" type="string"/>
        <att name="NODE_CUSTOMGRAPHICS_5" value="org.cytoscape.ding.customgraphics.NullCustomGraphics,0,[ Remove Graphics ]," type="string"/>
        <att name="NODE_CUSTOMGRAPHICS_9" value="org.cytoscape.ding.customgraphics.NullCustomGraphics,0,[ Remove Graphics ]," type="string"/>
        <att name="NODE_CUSTOMGRAPHICS_1" value="org.cytoscape.ding.customgraphics.NullCustomGraphics,0,[ Remove Graphics ]," type="string"/>
        <att name="NODE_CUSTOMGRAPHICS_POSITION_6" value="C,C,c,0.00,0.00" type="string"/>
        <att name="NODE_CUSTOMGRAPHICS_POSITION_2" value="C,C,c,0.00,0.00" type="string"/>
        <att name="NODE_SELECTED_PAINT" value="#FFFF00" type="string"/>
        <att name="NODE_HEIGHT" value="30.0" type="string"/>
        <att name="NODE_CUSTOMGRAPHICS_POSITION_8" value="C,C,c,0.00,0.00" type="string"/>
        <att name="NODE_CUSTOMGRAPHICS_POSITION_9" value="C,C,c,0.00,0.00" type="string"/>
        <att name="NODE_CUSTOMGRAPHICS_POSITION_1" value="C,C,c,0.00,0.00" type="string"/>
        <att name="NODE_BORDER_TRANSPARENCY" value="255" type="string"/>
        <att name="NODE_CUSTOMGRAPHICS_SIZE_3" value="0.0" type="string"/>
        <att name="NODE_CUSTOMGRAPHICS_3" value="org.cytoscape.ding.customgraphics.NullCustomGraphics,0,[ Remove Graphics ]," type="string"/>
        <att name="NODE_CUSTOMGRAPHICS_7" value="org.cytoscape.ding.customgraphics.NullCustomGraphics,0,[ Remove Graphics ]," type="string"/>
        <att name="NODE_CUSTOMGRAPHICS_SIZE_7" value="0.0" type="string"/>
        <att name="NODE_CUSTOMGRAPHICS_SIZE_8" value="0.0" type="string"/>
        <att name="NODE_CUSTOMGRAPHICS_POSITION_5" value="C,C,c,0.00,0.00" type="string"/>
        <att name="NODE_SHAPE" value="ROUND_RECTANGLE" type="string"/>
        <att name="NODE_SELECTED" value="false" type="string"/>
        <att name="NODE_DEPTH" value="0.0" type="string"/>
        <att name="NODE_CUSTOMGRAPHICS_SIZE_5" value="0.0" type="string"/>
        <att name="NODE_FILL_COLOR" value="#C8C8C8" type="string"/>
        <att name="NODE_VISIBLE" value="true" type="string"/>
        <att name="NODE_BORDER_WIDTH" value="0.0" type="string"/>
        <att name="NODE_TOOLTIP" value="" type="string"/>
        <att name="NODE_BORDER_PAINT" value="#006699" type="string"/>
        <att name="NODE_CUSTOMGRAPHICS_6" value="org.cytoscape.ding.customgraphics.NullCustomGraphics,0,[ Remove Graphics ]," type="string"/>
        <att name="NODE_WIDTH" value="80.0" type="string"/>
        <att name="NODE_CUSTOMGRAPHICS_POSITION_3" value="C,C,c,0.00,0.00" type="string"/>
        <att name="NODE_CUSTOMGRAPHICS_4" value="org.cytoscape.ding.customgraphics.NullCustomGraphics,0,[ Remove Graphics ]," type="string"/>
        <att name="NODE_LABEL_POSITION" value="C,C,c,0.00,0.00" type="string"/>
        <att name="NODE_LABEL_TRANSPARENCY" value="255" type="string"/>
        <att name="NODE_CUSTOMGRAPHICS_SIZE_4" value="0.0" type="string"/>
        <att name="NODE_CUSTOMGRAPHICS_2" value="org.cytoscape.ding.customgraphics.NullCustomGraphics,0,[ Remove Graphics ]," type="string"/>
        <att name="NODE_CUSTOMGRAPHICS_POSITION_4" value="C,C,c,0.00,0.00" type="string"/>
        <att name="NODE_LABEL_FONT_FACE" value="Dialog.plain,plain,18" type="string"/>
        <att name="NODE_CUSTOMGRAPHICS_SIZE_9" value="0.0" type="string"/>
        <att name="NODE_LABEL_COLOR" value="#000000" type="string"/>
        <att name="NODE_LABEL_FONT_SIZE" value="18" type="string"/>
        <att name="NODE_LABEL" value="SEPSECS" type="string"/>
      </att>
    </graphics>
  </node>
  <node id="2795" label="NCS1" cy:nodeId="2087">
    <graphics y="-7.910041444014553" z="0.0" x="254.8358228765483">
      <att name="lockedVisualProperties" type="list">
        <att name="NODE_NESTED_NETWORK_IMAGE_VISIBLE" value="true" type="string"/>
        <att name="NODE_CUSTOMGRAPHICS_SIZE_2" value="0.0" type="string"/>
        <att name="NODE_CUSTOMGRAPHICS_SIZE_6" value="0.0" type="string"/>
        <att name="NODE_BORDER_STROKE" value="SOLID" type="string"/>
        <att name="NODE_CUSTOMGRAPHICS_POSITION_7" value="C,C,c,0.00,0.00" type="string"/>
        <att name="NODE_CUSTOMGRAPHICS_8" value="org.cytoscape.ding.customgraphics.NullCustomGraphics,0,[ Remove Graphics ]," type="string"/>
        <att name="NODE_TRANSPARENCY" value="255" type="string"/>
        <att name="NODE_LABEL_WIDTH" value="200.0" type="string"/>
        <att name="NODE_CUSTOMGRAPHICS_SIZE_1" value="0.0" type="string"/>
        <att name="NODE_CUSTOMGRAPHICS_5" value="org.cytoscape.ding.customgraphics.NullCustomGraphics,0,[ Remove Graphics ]," type="string"/>
        <att name="NODE_CUSTOMGRAPHICS_9" value="org.cytoscape.ding.customgraphics.NullCustomGraphics,0,[ Remove Graphics ]," type="string"/>
        <att name="NODE_CUSTOMGRAPHICS_1" value="org.cytoscape.ding.customgraphics.NullCustomGraphics,0,[ Remove Graphics ]," type="string"/>
        <att name="NODE_CUSTOMGRAPHICS_POSITION_6" value="C,C,c,0.00,0.00" type="string"/>
        <att name="NODE_CUSTOMGRAPHICS_POSITION_2" value="C,C,c,0.00,0.00" type="string"/>
        <att name="NODE_SELECTED_PAINT" value="#FFFF00" type="string"/>
        <att name="NODE_HEIGHT" value="30.0" type="string"/>
        <att name="NODE_CUSTOMGRAPHICS_POSITION_8" value="C,C,c,0.00,0.00" type="string"/>
        <att name="NODE_CUSTOMGRAPHICS_POSITION_9" value="C,C,c,0.00,0.00" type="string"/>
        <att name="NODE_CUSTOMGRAPHICS_POSITION_1" value="C,C,c,0.00,0.00" type="string"/>
        <att name="NODE_BORDER_TRANSPARENCY" value="255" type="string"/>
        <att name="NODE_CUSTOMGRAPHICS_SIZE_3" value="0.0" type="string"/>
        <att name="NODE_CUSTOMGRAPHICS_3" value="org.cytoscape.ding.customgraphics.NullCustomGraphics,0,[ Remove Graphics ]," type="string"/>
        <att name="NODE_CUSTOMGRAPHICS_7" value="org.cytoscape.ding.customgraphics.NullCustomGraphics,0,[ Remove Graphics ]," type="string"/>
        <att name="NODE_CUSTOMGRAPHICS_SIZE_7" value="0.0" type="string"/>
        <att name="NODE_CUSTOMGRAPHICS_SIZE_8" value="0.0" type="string"/>
        <att name="NODE_CUSTOMGRAPHICS_POSITION_5" value="C,C,c,0.00,0.00" type="string"/>
        <att name="NODE_SHAPE" value="ROUND_RECTANGLE" type="string"/>
        <att name="NODE_SELECTED" value="false" type="string"/>
        <att name="NODE_DEPTH" value="0.0" type="string"/>
        <att name="NODE_CUSTOMGRAPHICS_SIZE_5" value="0.0" type="string"/>
        <att name="NODE_FILL_COLOR" value="#C8C8C8" type="string"/>
        <att name="NODE_VISIBLE" value="true" type="string"/>
        <att name="NODE_BORDER_WIDTH" value="0.0" type="string"/>
        <att name="NODE_TOOLTIP" value="" type="string"/>
        <att name="NODE_BORDER_PAINT" value="#006699" type="string"/>
        <att name="NODE_CUSTOMGRAPHICS_6" value="org.cytoscape.ding.customgraphics.NullCustomGraphics,0,[ Remove Graphics ]," type="string"/>
        <att name="NODE_WIDTH" value="80.0" type="string"/>
        <att name="NODE_CUSTOMGRAPHICS_POSITION_3" value="C,C,c,0.00,0.00" type="string"/>
        <att name="NODE_CUSTOMGRAPHICS_4" value="org.cytoscape.ding.customgraphics.NullCustomGraphics,0,[ Remove Graphics ]," type="string"/>
        <att name="NODE_LABEL_POSITION" value="C,C,c,0.00,0.00" type="string"/>
        <att name="NODE_LABEL_TRANSPARENCY" value="255" type="string"/>
        <att name="NODE_CUSTOMGRAPHICS_SIZE_4" value="0.0" type="string"/>
        <att name="NODE_CUSTOMGRAPHICS_2" value="org.cytoscape.ding.customgraphics.NullCustomGraphics,0,[ Remove Graphics ]," type="string"/>
        <att name="NODE_CUSTOMGRAPHICS_POSITION_4" value="C,C,c,0.00,0.00" type="string"/>
        <att name="NODE_LABEL_FONT_FACE" value="Dialog.plain,plain,18" type="string"/>
        <att name="NODE_CUSTOMGRAPHICS_SIZE_9" value="0.0" type="string"/>
        <att name="NODE_LABEL_COLOR" value="#000000" type="string"/>
        <att name="NODE_LABEL_FONT_SIZE" value="18" type="string"/>
        <att name="NODE_LABEL" value="NCS1" type="string"/>
      </att>
    </graphics>
  </node>
  <node id="2794" label="LRRC69" cy:nodeId="2088">
    <graphics y="-190.6072998046875" z="0.0" x="-949.5631777873216">
      <att name="lockedVisualProperties" type="list">
        <att name="NODE_NESTED_NETWORK_IMAGE_VISIBLE" value="true" type="string"/>
        <att name="NODE_CUSTOMGRAPHICS_SIZE_2" value="0.0" type="string"/>
        <att name="NODE_CUSTOMGRAPHICS_SIZE_6" value="0.0" type="string"/>
        <att name="NODE_BORDER_STROKE" value="SOLID" type="string"/>
        <att name="NODE_CUSTOMGRAPHICS_POSITION_7" value="C,C,c,0.00,0.00" type="string"/>
        <att name="NODE_CUSTOMGRAPHICS_8" value="org.cytoscape.ding.customgraphics.NullCustomGraphics,0,[ Remove Graphics ]," type="string"/>
        <att name="NODE_TRANSPARENCY" value="255" type="string"/>
        <att name="NODE_LABEL_WIDTH" value="200.0" type="string"/>
        <att name="NODE_CUSTOMGRAPHICS_SIZE_1" value="0.0" type="string"/>
        <att name="NODE_CUSTOMGRAPHICS_5" value="org.cytoscape.ding.customgraphics.NullCustomGraphics,0,[ Remove Graphics ]," type="string"/>
        <att name="NODE_CUSTOMGRAPHICS_9" value="org.cytoscape.ding.customgraphics.NullCustomGraphics,0,[ Remove Graphics ]," type="string"/>
        <att name="NODE_CUSTOMGRAPHICS_1" value="org.cytoscape.ding.customgraphics.NullCustomGraphics,0,[ Remove Graphics ]," type="string"/>
        <att name="NODE_CUSTOMGRAPHICS_POSITION_6" value="C,C,c,0.00,0.00" type="string"/>
        <att name="NODE_CUSTOMGRAPHICS_POSITION_2" value="C,C,c,0.00,0.00" type="string"/>
        <att name="NODE_SELECTED_PAINT" value="#FFFF00" type="string"/>
        <att name="NODE_HEIGHT" value="30.0" type="string"/>
        <att name="NODE_CUSTOMGRAPHICS_POSITION_8" value="C,C,c,0.00,0.00" type="string"/>
        <att name="NODE_CUSTOMGRAPHICS_POSITION_9" value="C,C,c,0.00,0.00" type="string"/>
        <att name="NODE_CUSTOMGRAPHICS_POSITION_1" value="C,C,c,0.00,0.00" type="string"/>
        <att name="NODE_BORDER_TRANSPARENCY" value="255" type="string"/>
        <att name="NODE_CUSTOMGRAPHICS_SIZE_3" value="0.0" type="string"/>
        <att name="NODE_CUSTOMGRAPHICS_3" value="org.cytoscape.ding.customgraphics.NullCustomGraphics,0,[ Remove Graphics ]," type="string"/>
        <att name="NODE_CUSTOMGRAPHICS_7" value="org.cytoscape.ding.customgraphics.NullCustomGraphics,0,[ Remove Graphics ]," type="string"/>
        <att name="NODE_CUSTOMGRAPHICS_SIZE_7" value="0.0" type="string"/>
        <att name="NODE_CUSTOMGRAPHICS_SIZE_8" value="0.0" type="string"/>
        <att name="NODE_CUSTOMGRAPHICS_POSITION_5" value="C,C,c,0.00,0.00" type="string"/>
        <att name="NODE_SHAPE" value="ROUND_RECTANGLE" type="string"/>
        <att name="NODE_SELECTED" value="false" type="string"/>
        <att name="NODE_DEPTH" value="0.0" type="string"/>
        <att name="NODE_CUSTOMGRAPHICS_SIZE_5" value="0.0" type="string"/>
        <att name="NODE_FILL_COLOR" value="#C8C8C8" type="string"/>
        <att name="NODE_VISIBLE" value="true" type="string"/>
        <att name="NODE_BORDER_WIDTH" value="0.0" type="string"/>
        <att name="NODE_TOOLTIP" value="" type="string"/>
        <att name="NODE_BORDER_PAINT" value="#006699" type="string"/>
        <att name="NODE_CUSTOMGRAPHICS_6" value="org.cytoscape.ding.customgraphics.NullCustomGraphics,0,[ Remove Graphics ]," type="string"/>
        <att name="NODE_WIDTH" value="80.0" type="string"/>
        <att name="NODE_CUSTOMGRAPHICS_POSITION_3" value="C,C,c,0.00,0.00" type="string"/>
        <att name="NODE_CUSTOMGRAPHICS_4" value="org.cytoscape.ding.customgraphics.NullCustomGraphics,0,[ Remove Graphics ]," type="string"/>
        <att name="NODE_LABEL_POSITION" value="C,C,c,0.00,0.00" type="string"/>
        <att name="NODE_LABEL_TRANSPARENCY" value="255" type="string"/>
        <att name="NODE_CUSTOMGRAPHICS_SIZE_4" value="0.0" type="string"/>
        <att name="NODE_CUSTOMGRAPHICS_2" value="org.cytoscape.ding.customgraphics.NullCustomGraphics,0,[ Remove Graphics ]," type="string"/>
        <att name="NODE_CUSTOMGRAPHICS_POSITION_4" value="C,C,c,0.00,0.00" type="string"/>
        <att name="NODE_LABEL_FONT_FACE" value="Dialog.plain,plain,18" type="string"/>
        <att name="NODE_CUSTOMGRAPHICS_SIZE_9" value="0.0" type="string"/>
        <att name="NODE_LABEL_COLOR" value="#000000" type="string"/>
        <att name="NODE_LABEL_FONT_SIZE" value="18" type="string"/>
        <att name="NODE_LABEL" value="LRRC69" type="string"/>
      </att>
    </graphics>
  </node>
  <node id="2793" label="KHNYN" cy:nodeId="2089">
    <graphics y="-306.1331501961382" z="0.0" x="1220.7947998046875">
      <att name="lockedVisualProperties" type="list">
        <att name="NODE_NESTED_NETWORK_IMAGE_VISIBLE" value="true" type="string"/>
        <att name="NODE_CUSTOMGRAPHICS_SIZE_2" value="0.0" type="string"/>
        <att name="NODE_CUSTOMGRAPHICS_SIZE_6" value="0.0" type="string"/>
        <att name="NODE_BORDER_STROKE" value="SOLID" type="string"/>
        <att name="NODE_CUSTOMGRAPHICS_POSITION_7" value="C,C,c,0.00,0.00" type="string"/>
        <att name="NODE_CUSTOMGRAPHICS_8" value="org.cytoscape.ding.customgraphics.NullCustomGraphics,0,[ Remove Graphics ]," type="string"/>
        <att name="NODE_TRANSPARENCY" value="255" type="string"/>
        <att name="NODE_LABEL_WIDTH" value="200.0" type="string"/>
        <att name="NODE_CUSTOMGRAPHICS_SIZE_1" value="0.0" type="string"/>
        <att name="NODE_CUSTOMGRAPHICS_5" value="org.cytoscape.ding.customgraphics.NullCustomGraphics,0,[ Remove Graphics ]," type="string"/>
        <att name="NODE_CUSTOMGRAPHICS_9" value="org.cytoscape.ding.customgraphics.NullCustomGraphics,0,[ Remove Graphics ]," type="string"/>
        <att name="NODE_CUSTOMGRAPHICS_1" value="org.cytoscape.ding.customgraphics.NullCustomGraphics,0,[ Remove Graphics ]," type="string"/>
        <att name="NODE_CUSTOMGRAPHICS_POSITION_6" value="C,C,c,0.00,0.00" type="string"/>
        <att name="NODE_CUSTOMGRAPHICS_POSITION_2" value="C,C,c,0.00,0.00" type="string"/>
        <att name="NODE_SELECTED_PAINT" value="#FFFF00" type="string"/>
        <att name="NODE_HEIGHT" value="30.0" type="string"/>
        <att name="NODE_CUSTOMGRAPHICS_POSITION_8" value="C,C,c,0.00,0.00" type="string"/>
        <att name="NODE_CUSTOMGRAPHICS_POSITION_9" value="C,C,c,0.00,0.00" type="string"/>
        <att name="NODE_CUSTOMGRAPHICS_POSITION_1" value="C,C,c,0.00,0.00" type="string"/>
        <att name="NODE_BORDER_TRANSPARENCY" value="255" type="string"/>
        <att name="NODE_CUSTOMGRAPHICS_SIZE_3" value="0.0" type="string"/>
        <att name="NODE_CUSTOMGRAPHICS_3" value="org.cytoscape.ding.customgraphics.NullCustomGraphics,0,[ Remove Graphics ]," type="string"/>
        <att name="NODE_CUSTOMGRAPHICS_7" value="org.cytoscape.ding.customgraphics.NullCustomGraphics,0,[ Remove Graphics ]," type="string"/>
        <att name="NODE_CUSTOMGRAPHICS_SIZE_7" value="0.0" type="string"/>
        <att name="NODE_CUSTOMGRAPHICS_SIZE_8" value="0.0" type="string"/>
        <att name="NODE_CUSTOMGRAPHICS_POSITION_5" value="C,C,c,0.00,0.00" type="string"/>
        <att name="NODE_SHAPE" value="ROUND_RECTANGLE" type="string"/>
        <att name="NODE_SELECTED" value="false" type="string"/>
        <att name="NODE_DEPTH" value="0.0" type="string"/>
        <att name="NODE_CUSTOMGRAPHICS_SIZE_5" value="0.0" type="string"/>
        <att name="NODE_FILL_COLOR" value="#C8C8C8" type="string"/>
        <att name="NODE_VISIBLE" value="true" type="string"/>
        <att name="NODE_BORDER_WIDTH" value="0.0" type="string"/>
        <att name="NODE_TOOLTIP" value="" type="string"/>
        <att name="NODE_BORDER_PAINT" value="#006699" type="string"/>
        <att name="NODE_CUSTOMGRAPHICS_6" value="org.cytoscape.ding.customgraphics.NullCustomGraphics,0,[ Remove Graphics ]," type="string"/>
        <att name="NODE_WIDTH" value="80.0" type="string"/>
        <att name="NODE_CUSTOMGRAPHICS_POSITION_3" value="C,C,c,0.00,0.00" type="string"/>
        <att name="NODE_CUSTOMGRAPHICS_4" value="org.cytoscape.ding.customgraphics.NullCustomGraphics,0,[ Remove Graphics ]," type="string"/>
        <att name="NODE_LABEL_POSITION" value="C,C,c,0.00,0.00" type="string"/>
        <att name="NODE_LABEL_TRANSPARENCY" value="255" type="string"/>
        <att name="NODE_CUSTOMGRAPHICS_SIZE_4" value="0.0" type="string"/>
        <att name="NODE_CUSTOMGRAPHICS_2" value="org.cytoscape.ding.customgraphics.NullCustomGraphics,0,[ Remove Graphics ]," type="string"/>
        <att name="NODE_CUSTOMGRAPHICS_POSITION_4" value="C,C,c,0.00,0.00" type="string"/>
        <att name="NODE_LABEL_FONT_FACE" value="Dialog.plain,plain,18" type="string"/>
        <att name="NODE_CUSTOMGRAPHICS_SIZE_9" value="0.0" type="string"/>
        <att name="NODE_LABEL_COLOR" value="#000000" type="string"/>
        <att name="NODE_LABEL_FONT_SIZE" value="18" type="string"/>
        <att name="NODE_LABEL" value="KHNYN" type="string"/>
      </att>
    </graphics>
  </node>
  <node id="2792" label="GALNT1" cy:nodeId="2090">
    <graphics y="-232.5832061767578" z="0.0" x="-949.0422427287278">
      <att name="lockedVisualProperties" type="list">
        <att name="NODE_NESTED_NETWORK_IMAGE_VISIBLE" value="true" type="string"/>
        <att name="NODE_CUSTOMGRAPHICS_SIZE_2" value="0.0" type="string"/>
        <att name="NODE_CUSTOMGRAPHICS_SIZE_6" value="0.0" type="string"/>
        <att name="NODE_BORDER_STROKE" value="SOLID" type="string"/>
        <att name="NODE_CUSTOMGRAPHICS_POSITION_7" value="C,C,c,0.00,0.00" type="string"/>
        <att name="NODE_CUSTOMGRAPHICS_8" value="org.cytoscape.ding.customgraphics.NullCustomGraphics,0,[ Remove Graphics ]," type="string"/>
        <att name="NODE_TRANSPARENCY" value="255" type="string"/>
        <att name="NODE_LABEL_WIDTH" value="200.0" type="string"/>
        <att name="NODE_CUSTOMGRAPHICS_SIZE_1" value="0.0" type="string"/>
        <att name="NODE_CUSTOMGRAPHICS_5" value="org.cytoscape.ding.customgraphics.NullCustomGraphics,0,[ Remove Graphics ]," type="string"/>
        <att name="NODE_CUSTOMGRAPHICS_9" value="org.cytoscape.ding.customgraphics.NullCustomGraphics,0,[ Remove Graphics ]," type="string"/>
        <att name="NODE_CUSTOMGRAPHICS_1" value="org.cytoscape.ding.customgraphics.NullCustomGraphics,0,[ Remove Graphics ]," type="string"/>
        <att name="NODE_CUSTOMGRAPHICS_POSITION_6" value="C,C,c,0.00,0.00" type="string"/>
        <att name="NODE_CUSTOMGRAPHICS_POSITION_2" value="C,C,c,0.00,0.00" type="string"/>
        <att name="NODE_SELECTED_PAINT" value="#FFFF00" type="string"/>
        <att name="NODE_HEIGHT" value="30.0" type="string"/>
        <att name="NODE_CUSTOMGRAPHICS_POSITION_8" value="C,C,c,0.00,0.00" type="string"/>
        <att name="NODE_CUSTOMGRAPHICS_POSITION_9" value="C,C,c,0.00,0.00" type="string"/>
        <att name="NODE_CUSTOMGRAPHICS_POSITION_1" value="C,C,c,0.00,0.00" type="string"/>
        <att name="NODE_BORDER_TRANSPARENCY" value="255" type="string"/>
        <att name="NODE_CUSTOMGRAPHICS_SIZE_3" value="0.0" type="string"/>
        <att name="NODE_CUSTOMGRAPHICS_3" value="org.cytoscape.ding.customgraphics.NullCustomGraphics,0,[ Remove Graphics ]," type="string"/>
        <att name="NODE_CUSTOMGRAPHICS_7" value="org.cytoscape.ding.customgraphics.NullCustomGraphics,0,[ Remove Graphics ]," type="string"/>
        <att name="NODE_CUSTOMGRAPHICS_SIZE_7" value="0.0" type="string"/>
        <att name="NODE_CUSTOMGRAPHICS_SIZE_8" value="0.0" type="string"/>
        <att name="NODE_CUSTOMGRAPHICS_POSITION_5" value="C,C,c,0.00,0.00" type="string"/>
        <att name="NODE_SHAPE" value="ROUND_RECTANGLE" type="string"/>
        <att name="NODE_SELECTED" value="false" type="string"/>
        <att name="NODE_DEPTH" value="0.0" type="string"/>
        <att name="NODE_CUSTOMGRAPHICS_SIZE_5" value="0.0" type="string"/>
        <att name="NODE_FILL_COLOR" value="#C8C8C8" type="string"/>
        <att name="NODE_VISIBLE" value="true" type="string"/>
        <att name="NODE_BORDER_WIDTH" value="0.0" type="string"/>
        <att name="NODE_TOOLTIP" value="" type="string"/>
        <att name="NODE_BORDER_PAINT" value="#006699" type="string"/>
        <att name="NODE_CUSTOMGRAPHICS_6" value="org.cytoscape.ding.customgraphics.NullCustomGraphics,0,[ Remove Graphics ]," type="string"/>
        <att name="NODE_WIDTH" value="80.0" type="string"/>
        <att name="NODE_CUSTOMGRAPHICS_POSITION_3" value="C,C,c,0.00,0.00" type="string"/>
        <att name="NODE_CUSTOMGRAPHICS_4" value="org.cytoscape.ding.customgraphics.NullCustomGraphics,0,[ Remove Graphics ]," type="string"/>
        <att name="NODE_LABEL_POSITION" value="C,C,c,0.00,0.00" type="string"/>
        <att name="NODE_LABEL_TRANSPARENCY" value="255" type="string"/>
        <att name="NODE_CUSTOMGRAPHICS_SIZE_4" value="0.0" type="string"/>
        <att name="NODE_CUSTOMGRAPHICS_2" value="org.cytoscape.ding.customgraphics.NullCustomGraphics,0,[ Remove Graphics ]," type="string"/>
        <att name="NODE_CUSTOMGRAPHICS_POSITION_4" value="C,C,c,0.00,0.00" type="string"/>
        <att name="NODE_LABEL_FONT_FACE" value="Dialog.plain,plain,18" type="string"/>
        <att name="NODE_CUSTOMGRAPHICS_SIZE_9" value="0.0" type="string"/>
        <att name="NODE_LABEL_COLOR" value="#000000" type="string"/>
        <att name="NODE_LABEL_FONT_SIZE" value="18" type="string"/>
        <att name="NODE_LABEL" value="GALNT1" type="string"/>
      </att>
    </graphics>
  </node>
  <node id="2791" label="CD82" cy:nodeId="2091">
    <graphics y="149.38078344612217" z="0.0" x="64.03012829647017">
      <att name="lockedVisualProperties" type="list">
        <att name="NODE_NESTED_NETWORK_IMAGE_VISIBLE" value="true" type="string"/>
        <att name="NODE_CUSTOMGRAPHICS_SIZE_2" value="0.0" type="string"/>
        <att name="NODE_CUSTOMGRAPHICS_SIZE_6" value="0.0" type="string"/>
        <att name="NODE_BORDER_STROKE" value="SOLID" type="string"/>
        <att name="NODE_CUSTOMGRAPHICS_POSITION_7" value="C,C,c,0.00,0.00" type="string"/>
        <att name="NODE_CUSTOMGRAPHICS_8" value="org.cytoscape.ding.customgraphics.NullCustomGraphics,0,[ Remove Graphics ]," type="string"/>
        <att name="NODE_TRANSPARENCY" value="255" type="string"/>
        <att name="NODE_LABEL_WIDTH" value="200.0" type="string"/>
        <att name="NODE_CUSTOMGRAPHICS_SIZE_1" value="0.0" type="string"/>
        <att name="NODE_CUSTOMGRAPHICS_5" value="org.cytoscape.ding.customgraphics.NullCustomGraphics,0,[ Remove Graphics ]," type="string"/>
        <att name="NODE_CUSTOMGRAPHICS_9" value="org.cytoscape.ding.customgraphics.NullCustomGraphics,0,[ Remove Graphics ]," type="string"/>
        <att name="NODE_CUSTOMGRAPHICS_1" value="org.cytoscape.ding.customgraphics.NullCustomGraphics,0,[ Remove Graphics ]," type="string"/>
        <att name="NODE_CUSTOMGRAPHICS_POSITION_6" value="C,C,c,0.00,0.00" type="string"/>
        <att name="NODE_CUSTOMGRAPHICS_POSITION_2" value="C,C,c,0.00,0.00" type="string"/>
        <att name="NODE_SELECTED_PAINT" value="#FFFF00" type="string"/>
        <att name="NODE_HEIGHT" value="30.0" type="string"/>
        <att name="NODE_CUSTOMGRAPHICS_POSITION_8" value="C,C,c,0.00,0.00" type="string"/>
        <att name="NODE_CUSTOMGRAPHICS_POSITION_9" value="C,C,c,0.00,0.00" type="string"/>
        <att name="NODE_CUSTOMGRAPHICS_POSITION_1" value="C,C,c,0.00,0.00" type="string"/>
        <att name="NODE_BORDER_TRANSPARENCY" value="255" type="string"/>
        <att name="NODE_CUSTOMGRAPHICS_SIZE_3" value="0.0" type="string"/>
        <att name="NODE_CUSTOMGRAPHICS_3" value="org.cytoscape.ding.customgraphics.NullCustomGraphics,0,[ Remove Graphics ]," type="string"/>
        <att name="NODE_CUSTOMGRAPHICS_7" value="org.cytoscape.ding.customgraphics.NullCustomGraphics,0,[ Remove Graphics ]," type="string"/>
        <att name="NODE_CUSTOMGRAPHICS_SIZE_7" value="0.0" type="string"/>
        <att name="NODE_CUSTOMGRAPHICS_SIZE_8" value="0.0" type="string"/>
        <att name="NODE_CUSTOMGRAPHICS_POSITION_5" value="C,C,c,0.00,0.00" type="string"/>
        <att name="NODE_SHAPE" value="ROUND_RECTANGLE" type="string"/>
        <att name="NODE_SELECTED" value="false" type="string"/>
        <att name="NODE_DEPTH" value="0.0" type="string"/>
        <att name="NODE_CUSTOMGRAPHICS_SIZE_5" value="0.0" type="string"/>
        <att name="NODE_FILL_COLOR" value="#C8C8C8" type="string"/>
        <att name="NODE_VISIBLE" value="true" type="string"/>
        <att name="NODE_BORDER_WIDTH" value="0.0" type="string"/>
        <att name="NODE_TOOLTIP" value="" type="string"/>
        <att name="NODE_BORDER_PAINT" value="#006699" type="string"/>
        <att name="NODE_CUSTOMGRAPHICS_6" value="org.cytoscape.ding.customgraphics.NullCustomGraphics,0,[ Remove Graphics ]," type="string"/>
        <att name="NODE_WIDTH" value="80.0" type="string"/>
        <att name="NODE_CUSTOMGRAPHICS_POSITION_3" value="C,C,c,0.00,0.00" type="string"/>
        <att name="NODE_CUSTOMGRAPHICS_4" value="org.cytoscape.ding.customgraphics.NullCustomGraphics,0,[ Remove Graphics ]," type="string"/>
        <att name="NODE_LABEL_POSITION" value="C,C,c,0.00,0.00" type="string"/>
        <att name="NODE_LABEL_TRANSPARENCY" value="255" type="string"/>
        <att name="NODE_CUSTOMGRAPHICS_SIZE_4" value="0.0" type="string"/>
        <att name="NODE_CUSTOMGRAPHICS_2" value="org.cytoscape.ding.customgraphics.NullCustomGraphics,0,[ Remove Graphics ]," type="string"/>
        <att name="NODE_CUSTOMGRAPHICS_POSITION_4" value="C,C,c,0.00,0.00" type="string"/>
        <att name="NODE_LABEL_FONT_FACE" value="Dialog.plain,plain,18" type="string"/>
        <att name="NODE_CUSTOMGRAPHICS_SIZE_9" value="0.0" type="string"/>
        <att name="NODE_LABEL_COLOR" value="#000000" type="string"/>
        <att name="NODE_LABEL_FONT_SIZE" value="18" type="string"/>
        <att name="NODE_LABEL" value="CD82" type="string"/>
      </att>
    </graphics>
  </node>
  <node id="2790" label="ULBP3" cy:nodeId="2092">
    <graphics y="105.95220983772373" z="0.0" x="445.39014416561076">
      <att name="lockedVisualProperties" type="list">
        <att name="NODE_NESTED_NETWORK_IMAGE_VISIBLE" value="true" type="string"/>
        <att name="NODE_CUSTOMGRAPHICS_SIZE_2" value="0.0" type="string"/>
        <att name="NODE_CUSTOMGRAPHICS_SIZE_6" value="0.0" type="string"/>
        <att name="NODE_BORDER_STROKE" value="SOLID" type="string"/>
        <att name="NODE_CUSTOMGRAPHICS_POSITION_7" value="C,C,c,0.00,0.00" type="string"/>
        <att name="NODE_CUSTOMGRAPHICS_8" value="org.cytoscape.ding.customgraphics.NullCustomGraphics,0,[ Remove Graphics ]," type="string"/>
        <att name="NODE_TRANSPARENCY" value="255" type="string"/>
        <att name="NODE_LABEL_WIDTH" value="200.0" type="string"/>
        <att name="NODE_CUSTOMGRAPHICS_SIZE_1" value="0.0" type="string"/>
        <att name="NODE_CUSTOMGRAPHICS_5" value="org.cytoscape.ding.customgraphics.NullCustomGraphics,0,[ Remove Graphics ]," type="string"/>
        <att name="NODE_CUSTOMGRAPHICS_9" value="org.cytoscape.ding.customgraphics.NullCustomGraphics,0,[ Remove Graphics ]," type="string"/>
        <att name="NODE_CUSTOMGRAPHICS_1" value="org.cytoscape.ding.customgraphics.NullCustomGraphics,0,[ Remove Graphics ]," type="string"/>
        <att name="NODE_CUSTOMGRAPHICS_POSITION_6" value="C,C,c,0.00,0.00" type="string"/>
        <att name="NODE_CUSTOMGRAPHICS_POSITION_2" value="C,C,c,0.00,0.00" type="string"/>
        <att name="NODE_SELECTED_PAINT" value="#FFFF00" type="string"/>
        <att name="NODE_HEIGHT" value="30.0" type="string"/>
        <att name="NODE_CUSTOMGRAPHICS_POSITION_8" value="C,C,c,0.00,0.00" type="string"/>
        <att name="NODE_CUSTOMGRAPHICS_POSITION_9" value="C,C,c,0.00,0.00" type="string"/>
        <att name="NODE_CUSTOMGRAPHICS_POSITION_1" value="C,C,c,0.00,0.00" type="string"/>
        <att name="NODE_BORDER_TRANSPARENCY" value="255" type="string"/>
        <att name="NODE_CUSTOMGRAPHICS_SIZE_3" value="0.0" type="string"/>
        <att name="NODE_CUSTOMGRAPHICS_3" value="org.cytoscape.ding.customgraphics.NullCustomGraphics,0,[ Remove Graphics ]," type="string"/>
        <att name="NODE_CUSTOMGRAPHICS_7" value="org.cytoscape.ding.customgraphics.NullCustomGraphics,0,[ Remove Graphics ]," type="string"/>
        <att name="NODE_CUSTOMGRAPHICS_SIZE_7" value="0.0" type="string"/>
        <att name="NODE_CUSTOMGRAPHICS_SIZE_8" value="0.0" type="string"/>
        <att name="NODE_CUSTOMGRAPHICS_POSITION_5" value="C,C,c,0.00,0.00" type="string"/>
        <att name="NODE_SHAPE" value="ROUND_RECTANGLE" type="string"/>
        <att name="NODE_SELECTED" value="false" type="string"/>
        <att name="NODE_DEPTH" value="0.0" type="string"/>
        <att name="NODE_CUSTOMGRAPHICS_SIZE_5" value="0.0" type="string"/>
        <att name="NODE_FILL_COLOR" value="#C8C8C8" type="string"/>
        <att name="NODE_VISIBLE" value="true" type="string"/>
        <att name="NODE_BORDER_WIDTH" value="0.0" type="string"/>
        <att name="NODE_TOOLTIP" value="" type="string"/>
        <att name="NODE_BORDER_PAINT" value="#006699" type="string"/>
        <att name="NODE_CUSTOMGRAPHICS_6" value="org.cytoscape.ding.customgraphics.NullCustomGraphics,0,[ Remove Graphics ]," type="string"/>
        <att name="NODE_WIDTH" value="80.0" type="string"/>
        <att name="NODE_CUSTOMGRAPHICS_POSITION_3" value="C,C,c,0.00,0.00" type="string"/>
        <att name="NODE_CUSTOMGRAPHICS_4" value="org.cytoscape.ding.customgraphics.NullCustomGraphics,0,[ Remove Graphics ]," type="string"/>
        <att name="NODE_LABEL_POSITION" value="C,C,c,0.00,0.00" type="string"/>
        <att name="NODE_LABEL_TRANSPARENCY" value="255" type="string"/>
        <att name="NODE_CUSTOMGRAPHICS_SIZE_4" value="0.0" type="string"/>
        <att name="NODE_CUSTOMGRAPHICS_2" value="org.cytoscape.ding.customgraphics.NullCustomGraphics,0,[ Remove Graphics ]," type="string"/>
        <att name="NODE_CUSTOMGRAPHICS_POSITION_4" value="C,C,c,0.00,0.00" type="string"/>
        <att name="NODE_LABEL_FONT_FACE" value="Dialog.plain,plain,18" type="string"/>
        <att name="NODE_CUSTOMGRAPHICS_SIZE_9" value="0.0" type="string"/>
        <att name="NODE_LABEL_COLOR" value="#000000" type="string"/>
        <att name="NODE_LABEL_FONT_SIZE" value="18" type="string"/>
        <att name="NODE_LABEL" value="ULBP3" type="string"/>
      </att>
    </graphics>
  </node>
  <node id="2789" label="LGR4" cy:nodeId="2093">
    <graphics y="-574.7131930598242" z="0.0" x="1135.4169284113868">
      <att name="lockedVisualProperties" type="list">
        <att name="NODE_NESTED_NETWORK_IMAGE_VISIBLE" value="true" type="string"/>
        <att name="NODE_CUSTOMGRAPHICS_SIZE_2" value="0.0" type="string"/>
        <att name="NODE_CUSTOMGRAPHICS_SIZE_6" value="0.0" type="string"/>
        <att name="NODE_BORDER_STROKE" value="SOLID" type="string"/>
        <att name="NODE_CUSTOMGRAPHICS_POSITION_7" value="C,C,c,0.00,0.00" type="string"/>
        <att name="NODE_CUSTOMGRAPHICS_8" value="org.cytoscape.ding.customgraphics.NullCustomGraphics,0,[ Remove Graphics ]," type="string"/>
        <att name="NODE_TRANSPARENCY" value="255" type="string"/>
        <att name="NODE_LABEL_WIDTH" value="200.0" type="string"/>
        <att name="NODE_CUSTOMGRAPHICS_SIZE_1" value="0.0" type="string"/>
        <att name="NODE_CUSTOMGRAPHICS_5" value="org.cytoscape.ding.customgraphics.NullCustomGraphics,0,[ Remove Graphics ]," type="string"/>
        <att name="NODE_CUSTOMGRAPHICS_9" value="org.cytoscape.ding.customgraphics.NullCustomGraphics,0,[ Remove Graphics ]," type="string"/>
        <att name="NODE_CUSTOMGRAPHICS_1" value="org.cytoscape.ding.customgraphics.NullCustomGraphics,0,[ Remove Graphics ]," type="string"/>
        <att name="NODE_CUSTOMGRAPHICS_POSITION_6" value="C,C,c,0.00,0.00" type="string"/>
        <att name="NODE_CUSTOMGRAPHICS_POSITION_2" value="C,C,c,0.00,0.00" type="string"/>
        <att name="NODE_SELECTED_PAINT" value="#FFFF00" type="string"/>
        <att name="NODE_HEIGHT" value="30.0" type="string"/>
        <att name="NODE_CUSTOMGRAPHICS_POSITION_8" value="C,C,c,0.00,0.00" type="string"/>
        <att name="NODE_CUSTOMGRAPHICS_POSITION_9" value="C,C,c,0.00,0.00" type="string"/>
        <att name="NODE_CUSTOMGRAPHICS_POSITION_1" value="C,C,c,0.00,0.00" type="string"/>
        <att name="NODE_BORDER_TRANSPARENCY" value="255" type="string"/>
        <att name="NODE_CUSTOMGRAPHICS_SIZE_3" value="0.0" type="string"/>
        <att name="NODE_CUSTOMGRAPHICS_3" value="org.cytoscape.ding.customgraphics.NullCustomGraphics,0,[ Remove Graphics ]," type="string"/>
        <att name="NODE_CUSTOMGRAPHICS_7" value="org.cytoscape.ding.customgraphics.NullCustomGraphics,0,[ Remove Graphics ]," type="string"/>
        <att name="NODE_CUSTOMGRAPHICS_SIZE_7" value="0.0" type="string"/>
        <att name="NODE_CUSTOMGRAPHICS_SIZE_8" value="0.0" type="string"/>
        <att name="NODE_CUSTOMGRAPHICS_POSITION_5" value="C,C,c,0.00,0.00" type="string"/>
        <att name="NODE_SHAPE" value="ROUND_RECTANGLE" type="string"/>
        <att name="NODE_SELECTED" value="false" type="string"/>
        <att name="NODE_DEPTH" value="0.0" type="string"/>
        <att name="NODE_CUSTOMGRAPHICS_SIZE_5" value="0.0" type="string"/>
        <att name="NODE_FILL_COLOR" value="#C8C8C8" type="string"/>
        <att name="NODE_VISIBLE" value="true" type="string"/>
        <att name="NODE_BORDER_WIDTH" value="0.0" type="string"/>
        <att name="NODE_TOOLTIP" value="" type="string"/>
        <att name="NODE_BORDER_PAINT" value="#006699" type="string"/>
        <att name="NODE_CUSTOMGRAPHICS_6" value="org.cytoscape.ding.customgraphics.NullCustomGraphics,0,[ Remove Graphics ]," type="string"/>
        <att name="NODE_WIDTH" value="80.0" type="string"/>
        <att name="NODE_CUSTOMGRAPHICS_POSITION_3" value="C,C,c,0.00,0.00" type="string"/>
        <att name="NODE_CUSTOMGRAPHICS_4" value="org.cytoscape.ding.customgraphics.NullCustomGraphics,0,[ Remove Graphics ]," type="string"/>
        <att name="NODE_LABEL_POSITION" value="C,C,c,0.00,0.00" type="string"/>
        <att name="NODE_LABEL_TRANSPARENCY" value="255" type="string"/>
        <att name="NODE_CUSTOMGRAPHICS_SIZE_4" value="0.0" type="string"/>
        <att name="NODE_CUSTOMGRAPHICS_2" value="org.cytoscape.ding.customgraphics.NullCustomGraphics,0,[ Remove Graphics ]," type="string"/>
        <att name="NODE_CUSTOMGRAPHICS_POSITION_4" value="C,C,c,0.00,0.00" type="string"/>
        <att name="NODE_LABEL_FONT_FACE" value="Dialog.plain,plain,18" type="string"/>
        <att name="NODE_CUSTOMGRAPHICS_SIZE_9" value="0.0" type="string"/>
        <att name="NODE_LABEL_COLOR" value="#000000" type="string"/>
        <att name="NODE_LABEL_FONT_SIZE" value="18" type="string"/>
        <att name="NODE_LABEL" value="LGR4" type="string"/>
      </att>
    </graphics>
  </node>
  <node id="2788" label="TRAF1" cy:nodeId="2094">
    <graphics y="-591.0541673306933" z="0.0" x="1050.8569654818066">
      <att name="lockedVisualProperties" type="list">
        <att name="NODE_NESTED_NETWORK_IMAGE_VISIBLE" value="true" type="string"/>
        <att name="NODE_CUSTOMGRAPHICS_SIZE_2" value="0.0" type="string"/>
        <att name="NODE_CUSTOMGRAPHICS_SIZE_6" value="0.0" type="string"/>
        <att name="NODE_BORDER_STROKE" value="SOLID" type="string"/>
        <att name="NODE_CUSTOMGRAPHICS_POSITION_7" value="C,C,c,0.00,0.00" type="string"/>
        <att name="NODE_CUSTOMGRAPHICS_8" value="org.cytoscape.ding.customgraphics.NullCustomGraphics,0,[ Remove Graphics ]," type="string"/>
        <att name="NODE_TRANSPARENCY" value="255" type="string"/>
        <att name="NODE_LABEL_WIDTH" value="200.0" type="string"/>
        <att name="NODE_CUSTOMGRAPHICS_SIZE_1" value="0.0" type="string"/>
        <att name="NODE_CUSTOMGRAPHICS_5" value="org.cytoscape.ding.customgraphics.NullCustomGraphics,0,[ Remove Graphics ]," type="string"/>
        <att name="NODE_CUSTOMGRAPHICS_9" value="org.cytoscape.ding.customgraphics.NullCustomGraphics,0,[ Remove Graphics ]," type="string"/>
        <att name="NODE_CUSTOMGRAPHICS_1" value="org.cytoscape.ding.customgraphics.NullCustomGraphics,0,[ Remove Graphics ]," type="string"/>
        <att name="NODE_CUSTOMGRAPHICS_POSITION_6" value="C,C,c,0.00,0.00" type="string"/>
        <att name="NODE_CUSTOMGRAPHICS_POSITION_2" value="C,C,c,0.00,0.00" type="string"/>
        <att name="NODE_SELECTED_PAINT" value="#FFFF00" type="string"/>
        <att name="NODE_HEIGHT" value="30.0" type="string"/>
        <att name="NODE_CUSTOMGRAPHICS_POSITION_8" value="C,C,c,0.00,0.00" type="string"/>
        <att name="NODE_CUSTOMGRAPHICS_POSITION_9" value="C,C,c,0.00,0.00" type="string"/>
        <att name="NODE_CUSTOMGRAPHICS_POSITION_1" value="C,C,c,0.00,0.00" type="string"/>
        <att name="NODE_BORDER_TRANSPARENCY" value="255" type="string"/>
        <att name="NODE_CUSTOMGRAPHICS_SIZE_3" value="0.0" type="string"/>
        <att name="NODE_CUSTOMGRAPHICS_3" value="org.cytoscape.ding.customgraphics.NullCustomGraphics,0,[ Remove Graphics ]," type="string"/>
        <att name="NODE_CUSTOMGRAPHICS_7" value="org.cytoscape.ding.customgraphics.NullCustomGraphics,0,[ Remove Graphics ]," type="string"/>
        <att name="NODE_CUSTOMGRAPHICS_SIZE_7" value="0.0" type="string"/>
        <att name="NODE_CUSTOMGRAPHICS_SIZE_8" value="0.0" type="string"/>
        <att name="NODE_CUSTOMGRAPHICS_POSITION_5" value="C,C,c,0.00,0.00" type="string"/>
        <att name="NODE_SHAPE" value="ROUND_RECTANGLE" type="string"/>
        <att name="NODE_SELECTED" value="false" type="string"/>
        <att name="NODE_DEPTH" value="0.0" type="string"/>
        <att name="NODE_CUSTOMGRAPHICS_SIZE_5" value="0.0" type="string"/>
        <att name="NODE_FILL_COLOR" value="#FF9F1C" type="string"/>
        <att name="NODE_VISIBLE" value="true" type="string"/>
        <att name="NODE_BORDER_WIDTH" value="0.0" type="string"/>
        <att name="NODE_TOOLTIP" value="" type="string"/>
        <att name="NODE_BORDER_PAINT" value="#006699" type="string"/>
        <att name="NODE_CUSTOMGRAPHICS_6" value="org.cytoscape.ding.customgraphics.NullCustomGraphics,0,[ Remove Graphics ]," type="string"/>
        <att name="NODE_WIDTH" value="80.0" type="string"/>
        <att name="NODE_CUSTOMGRAPHICS_POSITION_3" value="C,C,c,0.00,0.00" type="string"/>
        <att name="NODE_CUSTOMGRAPHICS_4" value="org.cytoscape.ding.customgraphics.NullCustomGraphics,0,[ Remove Graphics ]," type="string"/>
        <att name="NODE_LABEL_POSITION" value="C,C,c,0.00,0.00" type="string"/>
        <att name="NODE_LABEL_TRANSPARENCY" value="255" type="string"/>
        <att name="NODE_CUSTOMGRAPHICS_SIZE_4" value="0.0" type="string"/>
        <att name="NODE_CUSTOMGRAPHICS_2" value="org.cytoscape.ding.customgraphics.NullCustomGraphics,0,[ Remove Graphics ]," type="string"/>
        <att name="NODE_CUSTOMGRAPHICS_POSITION_4" value="C,C,c,0.00,0.00" type="string"/>
        <att name="NODE_LABEL_FONT_FACE" value="Dialog.plain,plain,18" type="string"/>
        <att name="NODE_CUSTOMGRAPHICS_SIZE_9" value="0.0" type="string"/>
        <att name="NODE_LABEL_COLOR" value="#000000" type="string"/>
        <att name="NODE_LABEL_FONT_SIZE" value="18" type="string"/>
        <att name="NODE_LABEL" value="TRAF1" type="string"/>
      </att>
    </graphics>
  </node>
  <node id="2787" label="FREM2" cy:nodeId="2095">
    <graphics y="-898.4972785530917" z="0.0" x="991.682373046875">
      <att name="lockedVisualProperties" type="list">
        <att name="NODE_NESTED_NETWORK_IMAGE_VISIBLE" value="true" type="string"/>
        <att name="NODE_CUSTOMGRAPHICS_SIZE_2" value="0.0" type="string"/>
        <att name="NODE_CUSTOMGRAPHICS_SIZE_6" value="0.0" type="string"/>
        <att name="NODE_BORDER_STROKE" value="SOLID" type="string"/>
        <att name="NODE_CUSTOMGRAPHICS_POSITION_7" value="C,C,c,0.00,0.00" type="string"/>
        <att name="NODE_CUSTOMGRAPHICS_8" value="org.cytoscape.ding.customgraphics.NullCustomGraphics,0,[ Remove Graphics ]," type="string"/>
        <att name="NODE_TRANSPARENCY" value="255" type="string"/>
        <att name="NODE_LABEL_WIDTH" value="200.0" type="string"/>
        <att name="NODE_CUSTOMGRAPHICS_SIZE_1" value="0.0" type="string"/>
        <att name="NODE_CUSTOMGRAPHICS_5" value="org.cytoscape.ding.customgraphics.NullCustomGraphics,0,[ Remove Graphics ]," type="string"/>
        <att name="NODE_CUSTOMGRAPHICS_9" value="org.cytoscape.ding.customgraphics.NullCustomGraphics,0,[ Remove Graphics ]," type="string"/>
        <att name="NODE_CUSTOMGRAPHICS_1" value="org.cytoscape.ding.customgraphics.NullCustomGraphics,0,[ Remove Graphics ]," type="string"/>
        <att name="NODE_CUSTOMGRAPHICS_POSITION_6" value="C,C,c,0.00,0.00" type="string"/>
        <att name="NODE_CUSTOMGRAPHICS_POSITION_2" value="C,C,c,0.00,0.00" type="string"/>
        <att name="NODE_SELECTED_PAINT" value="#FFFF00" type="string"/>
        <att name="NODE_HEIGHT" value="30.0" type="string"/>
        <att name="NODE_CUSTOMGRAPHICS_POSITION_8" value="C,C,c,0.00,0.00" type="string"/>
        <att name="NODE_CUSTOMGRAPHICS_POSITION_9" value="C,C,c,0.00,0.00" type="string"/>
        <att name="NODE_CUSTOMGRAPHICS_POSITION_1" value="C,C,c,0.00,0.00" type="string"/>
        <att name="NODE_BORDER_TRANSPARENCY" value="255" type="string"/>
        <att name="NODE_CUSTOMGRAPHICS_SIZE_3" value="0.0" type="string"/>
        <att name="NODE_CUSTOMGRAPHICS_3" value="org.cytoscape.ding.customgraphics.NullCustomGraphics,0,[ Remove Graphics ]," type="string"/>
        <att name="NODE_CUSTOMGRAPHICS_7" value="org.cytoscape.ding.customgraphics.NullCustomGraphics,0,[ Remove Graphics ]," type="string"/>
        <att name="NODE_CUSTOMGRAPHICS_SIZE_7" value="0.0" type="string"/>
        <att name="NODE_CUSTOMGRAPHICS_SIZE_8" value="0.0" type="string"/>
        <att name="NODE_CUSTOMGRAPHICS_POSITION_5" value="C,C,c,0.00,0.00" type="string"/>
        <att name="NODE_SHAPE" value="ROUND_RECTANGLE" type="string"/>
        <att name="NODE_SELECTED" value="false" type="string"/>
        <att name="NODE_DEPTH" value="0.0" type="string"/>
        <att name="NODE_CUSTOMGRAPHICS_SIZE_5" value="0.0" type="string"/>
        <att name="NODE_FILL_COLOR" value="#C8C8C8" type="string"/>
        <att name="NODE_VISIBLE" value="true" type="string"/>
        <att name="NODE_BORDER_WIDTH" value="0.0" type="string"/>
        <att name="NODE_TOOLTIP" value="" type="string"/>
        <att name="NODE_BORDER_PAINT" value="#006699" type="string"/>
        <att name="NODE_CUSTOMGRAPHICS_6" value="org.cytoscape.ding.customgraphics.NullCustomGraphics,0,[ Remove Graphics ]," type="string"/>
        <att name="NODE_WIDTH" value="80.0" type="string"/>
        <att name="NODE_CUSTOMGRAPHICS_POSITION_3" value="C,C,c,0.00,0.00" type="string"/>
        <att name="NODE_CUSTOMGRAPHICS_4" value="org.cytoscape.ding.customgraphics.NullCustomGraphics,0,[ Remove Graphics ]," type="string"/>
        <att name="NODE_LABEL_POSITION" value="C,C,c,0.00,0.00" type="string"/>
        <att name="NODE_LABEL_TRANSPARENCY" value="255" type="string"/>
        <att name="NODE_CUSTOMGRAPHICS_SIZE_4" value="0.0" type="string"/>
        <att name="NODE_CUSTOMGRAPHICS_2" value="org.cytoscape.ding.customgraphics.NullCustomGraphics,0,[ Remove Graphics ]," type="string"/>
        <att name="NODE_CUSTOMGRAPHICS_POSITION_4" value="C,C,c,0.00,0.00" type="string"/>
        <att name="NODE_LABEL_FONT_FACE" value="Dialog.plain,plain,18" type="string"/>
        <att name="NODE_CUSTOMGRAPHICS_SIZE_9" value="0.0" type="string"/>
        <att name="NODE_LABEL_COLOR" value="#000000" type="string"/>
        <att name="NODE_LABEL_FONT_SIZE" value="18" type="string"/>
        <att name="NODE_LABEL" value="FREM2" type="string"/>
      </att>
    </graphics>
  </node>
  <node id="2786" label="STAU2" cy:nodeId="2096">
    <graphics y="-1020.4094597281583" z="0.0" x="1107.039306640625">
      <att name="lockedVisualProperties" type="list">
        <att name="NODE_NESTED_NETWORK_IMAGE_VISIBLE" value="true" type="string"/>
        <att name="NODE_CUSTOMGRAPHICS_SIZE_2" value="0.0" type="string"/>
        <att name="NODE_CUSTOMGRAPHICS_SIZE_6" value="0.0" type="string"/>
        <att name="NODE_BORDER_STROKE" value="SOLID" type="string"/>
        <att name="NODE_CUSTOMGRAPHICS_POSITION_7" value="C,C,c,0.00,0.00" type="string"/>
        <att name="NODE_CUSTOMGRAPHICS_8" value="org.cytoscape.ding.customgraphics.NullCustomGraphics,0,[ Remove Graphics ]," type="string"/>
        <att name="NODE_TRANSPARENCY" value="255" type="string"/>
        <att name="NODE_LABEL_WIDTH" value="200.0" type="string"/>
        <att name="NODE_CUSTOMGRAPHICS_SIZE_1" value="0.0" type="string"/>
        <att name="NODE_CUSTOMGRAPHICS_5" value="org.cytoscape.ding.customgraphics.NullCustomGraphics,0,[ Remove Graphics ]," type="string"/>
        <att name="NODE_CUSTOMGRAPHICS_9" value="org.cytoscape.ding.customgraphics.NullCustomGraphics,0,[ Remove Graphics ]," type="string"/>
        <att name="NODE_CUSTOMGRAPHICS_1" value="org.cytoscape.ding.customgraphics.NullCustomGraphics,0,[ Remove Graphics ]," type="string"/>
        <att name="NODE_CUSTOMGRAPHICS_POSITION_6" value="C,C,c,0.00,0.00" type="string"/>
        <att name="NODE_CUSTOMGRAPHICS_POSITION_2" value="C,C,c,0.00,0.00" type="string"/>
        <att name="NODE_SELECTED_PAINT" value="#FFFF00" type="string"/>
        <att name="NODE_HEIGHT" value="30.0" type="string"/>
        <att name="NODE_CUSTOMGRAPHICS_POSITION_8" value="C,C,c,0.00,0.00" type="string"/>
        <att name="NODE_CUSTOMGRAPHICS_POSITION_9" value="C,C,c,0.00,0.00" type="string"/>
        <att name="NODE_CUSTOMGRAPHICS_POSITION_1" value="C,C,c,0.00,0.00" type="string"/>
        <att name="NODE_BORDER_TRANSPARENCY" value="255" type="string"/>
        <att name="NODE_CUSTOMGRAPHICS_SIZE_3" value="0.0" type="string"/>
        <att name="NODE_CUSTOMGRAPHICS_3" value="org.cytoscape.ding.customgraphics.NullCustomGraphics,0,[ Remove Graphics ]," type="string"/>
        <att name="NODE_CUSTOMGRAPHICS_7" value="org.cytoscape.ding.customgraphics.NullCustomGraphics,0,[ Remove Graphics ]," type="string"/>
        <att name="NODE_CUSTOMGRAPHICS_SIZE_7" value="0.0" type="string"/>
        <att name="NODE_CUSTOMGRAPHICS_SIZE_8" value="0.0" type="string"/>
        <att name="NODE_CUSTOMGRAPHICS_POSITION_5" value="C,C,c,0.00,0.00" type="string"/>
        <att name="NODE_SHAPE" value="ROUND_RECTANGLE" type="string"/>
        <att name="NODE_SELECTED" value="false" type="string"/>
        <att name="NODE_DEPTH" value="0.0" type="string"/>
        <att name="NODE_CUSTOMGRAPHICS_SIZE_5" value="0.0" type="string"/>
        <att name="NODE_FILL_COLOR" value="#C8C8C8" type="string"/>
        <att name="NODE_VISIBLE" value="true" type="string"/>
        <att name="NODE_BORDER_WIDTH" value="0.0" type="string"/>
        <att name="NODE_TOOLTIP" value="" type="string"/>
        <att name="NODE_BORDER_PAINT" value="#006699" type="string"/>
        <att name="NODE_CUSTOMGRAPHICS_6" value="org.cytoscape.ding.customgraphics.NullCustomGraphics,0,[ Remove Graphics ]," type="string"/>
        <att name="NODE_WIDTH" value="80.0" type="string"/>
        <att name="NODE_CUSTOMGRAPHICS_POSITION_3" value="C,C,c,0.00,0.00" type="string"/>
        <att name="NODE_CUSTOMGRAPHICS_4" value="org.cytoscape.ding.customgraphics.NullCustomGraphics,0,[ Remove Graphics ]," type="string"/>
        <att name="NODE_LABEL_POSITION" value="C,C,c,0.00,0.00" type="string"/>
        <att name="NODE_LABEL_TRANSPARENCY" value="255" type="string"/>
        <att name="NODE_CUSTOMGRAPHICS_SIZE_4" value="0.0" type="string"/>
        <att name="NODE_CUSTOMGRAPHICS_2" value="org.cytoscape.ding.customgraphics.NullCustomGraphics,0,[ Remove Graphics ]," type="string"/>
        <att name="NODE_CUSTOMGRAPHICS_POSITION_4" value="C,C,c,0.00,0.00" type="string"/>
        <att name="NODE_LABEL_FONT_FACE" value="Dialog.plain,plain,18" type="string"/>
        <att name="NODE_CUSTOMGRAPHICS_SIZE_9" value="0.0" type="string"/>
        <att name="NODE_LABEL_COLOR" value="#000000" type="string"/>
        <att name="NODE_LABEL_FONT_SIZE" value="18" type="string"/>
        <att name="NODE_LABEL" value="STAU2" type="string"/>
      </att>
    </graphics>
  </node>
  <node id="2785" label="DYRK1A" cy:nodeId="2097">
    <graphics y="-997.845753395246" z="0.0" x="1009.330078125">
      <att name="lockedVisualProperties" type="list">
        <att name="NODE_NESTED_NETWORK_IMAGE_VISIBLE" value="true" type="string"/>
        <att name="NODE_CUSTOMGRAPHICS_SIZE_2" value="0.0" type="string"/>
        <att name="NODE_CUSTOMGRAPHICS_SIZE_6" value="0.0" type="string"/>
        <att name="NODE_BORDER_STROKE" value="SOLID" type="string"/>
        <att name="NODE_CUSTOMGRAPHICS_POSITION_7" value="C,C,c,0.00,0.00" type="string"/>
        <att name="NODE_CUSTOMGRAPHICS_8" value="org.cytoscape.ding.customgraphics.NullCustomGraphics,0,[ Remove Graphics ]," type="string"/>
        <att name="NODE_TRANSPARENCY" value="255" type="string"/>
        <att name="NODE_LABEL_WIDTH" value="200.0" type="string"/>
        <att name="NODE_CUSTOMGRAPHICS_SIZE_1" value="0.0" type="string"/>
        <att name="NODE_CUSTOMGRAPHICS_5" value="org.cytoscape.ding.customgraphics.NullCustomGraphics,0,[ Remove Graphics ]," type="string"/>
        <att name="NODE_CUSTOMGRAPHICS_9" value="org.cytoscape.ding.customgraphics.NullCustomGraphics,0,[ Remove Graphics ]," type="string"/>
        <att name="NODE_CUSTOMGRAPHICS_1" value="org.cytoscape.ding.customgraphics.NullCustomGraphics,0,[ Remove Graphics ]," type="string"/>
        <att name="NODE_CUSTOMGRAPHICS_POSITION_6" value="C,C,c,0.00,0.00" type="string"/>
        <att name="NODE_CUSTOMGRAPHICS_POSITION_2" value="C,C,c,0.00,0.00" type="string"/>
        <att name="NODE_SELECTED_PAINT" value="#FFFF00" type="string"/>
        <att name="NODE_HEIGHT" value="30.0" type="string"/>
        <att name="NODE_CUSTOMGRAPHICS_POSITION_8" value="C,C,c,0.00,0.00" type="string"/>
        <att name="NODE_CUSTOMGRAPHICS_POSITION_9" value="C,C,c,0.00,0.00" type="string"/>
        <att name="NODE_CUSTOMGRAPHICS_POSITION_1" value="C,C,c,0.00,0.00" type="string"/>
        <att name="NODE_BORDER_TRANSPARENCY" value="255" type="string"/>
        <att name="NODE_CUSTOMGRAPHICS_SIZE_3" value="0.0" type="string"/>
        <att name="NODE_CUSTOMGRAPHICS_3" value="org.cytoscape.ding.customgraphics.NullCustomGraphics,0,[ Remove Graphics ]," type="string"/>
        <att name="NODE_CUSTOMGRAPHICS_7" value="org.cytoscape.ding.customgraphics.NullCustomGraphics,0,[ Remove Graphics ]," type="string"/>
        <att name="NODE_CUSTOMGRAPHICS_SIZE_7" value="0.0" type="string"/>
        <att name="NODE_CUSTOMGRAPHICS_SIZE_8" value="0.0" type="string"/>
        <att name="NODE_CUSTOMGRAPHICS_POSITION_5" value="C,C,c,0.00,0.00" type="string"/>
        <att name="NODE_SHAPE" value="ROUND_RECTANGLE" type="string"/>
        <att name="NODE_SELECTED" value="false" type="string"/>
        <att name="NODE_DEPTH" value="0.0" type="string"/>
        <att name="NODE_CUSTOMGRAPHICS_SIZE_5" value="0.0" type="string"/>
        <att name="NODE_FILL_COLOR" value="#C8C8C8" type="string"/>
        <att name="NODE_VISIBLE" value="true" type="string"/>
        <att name="NODE_BORDER_WIDTH" value="0.0" type="string"/>
        <att name="NODE_TOOLTIP" value="" type="string"/>
        <att name="NODE_BORDER_PAINT" value="#006699" type="string"/>
        <att name="NODE_CUSTOMGRAPHICS_6" value="org.cytoscape.ding.customgraphics.NullCustomGraphics,0,[ Remove Graphics ]," type="string"/>
        <att name="NODE_WIDTH" value="80.0" type="string"/>
        <att name="NODE_CUSTOMGRAPHICS_POSITION_3" value="C,C,c,0.00,0.00" type="string"/>
        <att name="NODE_CUSTOMGRAPHICS_4" value="org.cytoscape.ding.customgraphics.NullCustomGraphics,0,[ Remove Graphics ]," type="string"/>
        <att name="NODE_LABEL_POSITION" value="C,C,c,0.00,0.00" type="string"/>
        <att name="NODE_LABEL_TRANSPARENCY" value="255" type="string"/>
        <att name="NODE_CUSTOMGRAPHICS_SIZE_4" value="0.0" type="string"/>
        <att name="NODE_CUSTOMGRAPHICS_2" value="org.cytoscape.ding.customgraphics.NullCustomGraphics,0,[ Remove Graphics ]," type="string"/>
        <att name="NODE_CUSTOMGRAPHICS_POSITION_4" value="C,C,c,0.00,0.00" type="string"/>
        <att name="NODE_LABEL_FONT_FACE" value="Dialog.plain,plain,18" type="string"/>
        <att name="NODE_CUSTOMGRAPHICS_SIZE_9" value="0.0" type="string"/>
        <att name="NODE_LABEL_COLOR" value="#000000" type="string"/>
        <att name="NODE_LABEL_FONT_SIZE" value="18" type="string"/>
        <att name="NODE_LABEL" value="DYRK1A" type="string"/>
      </att>
    </graphics>
  </node>
  <node id="2784" label="PJA2" cy:nodeId="2098">
    <graphics y="8.022620250179722" z="0.0" x="-873.9951171875">
      <att name="lockedVisualProperties" type="list">
        <att name="NODE_NESTED_NETWORK_IMAGE_VISIBLE" value="true" type="string"/>
        <att name="NODE_CUSTOMGRAPHICS_SIZE_2" value="0.0" type="string"/>
        <att name="NODE_CUSTOMGRAPHICS_SIZE_6" value="0.0" type="string"/>
        <att name="NODE_BORDER_STROKE" value="SOLID" type="string"/>
        <att name="NODE_CUSTOMGRAPHICS_POSITION_7" value="C,C,c,0.00,0.00" type="string"/>
        <att name="NODE_CUSTOMGRAPHICS_8" value="org.cytoscape.ding.customgraphics.NullCustomGraphics,0,[ Remove Graphics ]," type="string"/>
        <att name="NODE_TRANSPARENCY" value="255" type="string"/>
        <att name="NODE_LABEL_WIDTH" value="200.0" type="string"/>
        <att name="NODE_CUSTOMGRAPHICS_SIZE_1" value="0.0" type="string"/>
        <att name="NODE_CUSTOMGRAPHICS_5" value="org.cytoscape.ding.customgraphics.NullCustomGraphics,0,[ Remove Graphics ]," type="string"/>
        <att name="NODE_CUSTOMGRAPHICS_9" value="org.cytoscape.ding.customgraphics.NullCustomGraphics,0,[ Remove Graphics ]," type="string"/>
        <att name="NODE_CUSTOMGRAPHICS_1" value="org.cytoscape.ding.customgraphics.NullCustomGraphics,0,[ Remove Graphics ]," type="string"/>
        <att name="NODE_CUSTOMGRAPHICS_POSITION_6" value="C,C,c,0.00,0.00" type="string"/>
        <att name="NODE_CUSTOMGRAPHICS_POSITION_2" value="C,C,c,0.00,0.00" type="string"/>
        <att name="NODE_SELECTED_PAINT" value="#FFFF00" type="string"/>
        <att name="NODE_HEIGHT" value="30.0" type="string"/>
        <att name="NODE_CUSTOMGRAPHICS_POSITION_8" value="C,C,c,0.00,0.00" type="string"/>
        <att name="NODE_CUSTOMGRAPHICS_POSITION_9" value="C,C,c,0.00,0.00" type="string"/>
        <att name="NODE_CUSTOMGRAPHICS_POSITION_1" value="C,C,c,0.00,0.00" type="string"/>
        <att name="NODE_BORDER_TRANSPARENCY" value="255" type="string"/>
        <att name="NODE_CUSTOMGRAPHICS_SIZE_3" value="0.0" type="string"/>
        <att name="NODE_CUSTOMGRAPHICS_3" value="org.cytoscape.ding.customgraphics.NullCustomGraphics,0,[ Remove Graphics ]," type="string"/>
        <att name="NODE_CUSTOMGRAPHICS_7" value="org.cytoscape.ding.customgraphics.NullCustomGraphics,0,[ Remove Graphics ]," type="string"/>
        <att name="NODE_CUSTOMGRAPHICS_SIZE_7" value="0.0" type="string"/>
        <att name="NODE_CUSTOMGRAPHICS_SIZE_8" value="0.0" type="string"/>
        <att name="NODE_CUSTOMGRAPHICS_POSITION_5" value="C,C,c,0.00,0.00" type="string"/>
        <att name="NODE_SHAPE" value="ROUND_RECTANGLE" type="string"/>
        <att name="NODE_SELECTED" value="false" type="string"/>
        <att name="NODE_DEPTH" value="0.0" type="string"/>
        <att name="NODE_CUSTOMGRAPHICS_SIZE_5" value="0.0" type="string"/>
        <att name="NODE_FILL_COLOR" value="#C8C8C8" type="string"/>
        <att name="NODE_VISIBLE" value="true" type="string"/>
        <att name="NODE_BORDER_WIDTH" value="0.0" type="string"/>
        <att name="NODE_TOOLTIP" value="" type="string"/>
        <att name="NODE_BORDER_PAINT" value="#006699" type="string"/>
        <att name="NODE_CUSTOMGRAPHICS_6" value="org.cytoscape.ding.customgraphics.NullCustomGraphics,0,[ Remove Graphics ]," type="string"/>
        <att name="NODE_WIDTH" value="80.0" type="string"/>
        <att name="NODE_CUSTOMGRAPHICS_POSITION_3" value="C,C,c,0.00,0.00" type="string"/>
        <att name="NODE_CUSTOMGRAPHICS_4" value="org.cytoscape.ding.customgraphics.NullCustomGraphics,0,[ Remove Graphics ]," type="string"/>
        <att name="NODE_LABEL_POSITION" value="C,C,c,0.00,0.00" type="string"/>
        <att name="NODE_LABEL_TRANSPARENCY" value="255" type="string"/>
        <att name="NODE_CUSTOMGRAPHICS_SIZE_4" value="0.0" type="string"/>
        <att name="NODE_CUSTOMGRAPHICS_2" value="org.cytoscape.ding.customgraphics.NullCustomGraphics,0,[ Remove Graphics ]," type="string"/>
        <att name="NODE_CUSTOMGRAPHICS_POSITION_4" value="C,C,c,0.00,0.00" type="string"/>
        <att name="NODE_LABEL_FONT_FACE" value="Dialog.plain,plain,18" type="string"/>
        <att name="NODE_CUSTOMGRAPHICS_SIZE_9" value="0.0" type="string"/>
        <att name="NODE_LABEL_COLOR" value="#000000" type="string"/>
        <att name="NODE_LABEL_FONT_SIZE" value="18" type="string"/>
        <att name="NODE_LABEL" value="PJA2" type="string"/>
      </att>
    </graphics>
  </node>
  <node id="2783" label="HPRT1" cy:nodeId="2099">
    <graphics y="-15.457014911311575" z="0.0" x="1238.1942569087569">
      <att name="lockedVisualProperties" type="list">
        <att name="NODE_NESTED_NETWORK_IMAGE_VISIBLE" value="true" type="string"/>
        <att name="NODE_CUSTOMGRAPHICS_SIZE_2" value="0.0" type="string"/>
        <att name="NODE_CUSTOMGRAPHICS_SIZE_6" value="0.0" type="string"/>
        <att name="NODE_BORDER_STROKE" value="SOLID" type="string"/>
        <att name="NODE_CUSTOMGRAPHICS_POSITION_7" value="C,C,c,0.00,0.00" type="string"/>
        <att name="NODE_CUSTOMGRAPHICS_8" value="org.cytoscape.ding.customgraphics.NullCustomGraphics,0,[ Remove Graphics ]," type="string"/>
        <att name="NODE_TRANSPARENCY" value="255" type="string"/>
        <att name="NODE_LABEL_WIDTH" value="200.0" type="string"/>
        <att name="NODE_CUSTOMGRAPHICS_SIZE_1" value="0.0" type="string"/>
        <att name="NODE_CUSTOMGRAPHICS_5" value="org.cytoscape.ding.customgraphics.NullCustomGraphics,0,[ Remove Graphics ]," type="string"/>
        <att name="NODE_CUSTOMGRAPHICS_9" value="org.cytoscape.ding.customgraphics.NullCustomGraphics,0,[ Remove Graphics ]," type="string"/>
        <att name="NODE_CUSTOMGRAPHICS_1" value="org.cytoscape.ding.customgraphics.NullCustomGraphics,0,[ Remove Graphics ]," type="string"/>
        <att name="NODE_CUSTOMGRAPHICS_POSITION_6" value="C,C,c,0.00,0.00" type="string"/>
        <att name="NODE_CUSTOMGRAPHICS_POSITION_2" value="C,C,c,0.00,0.00" type="string"/>
        <att name="NODE_SELECTED_PAINT" value="#FFFF00" type="string"/>
        <att name="NODE_HEIGHT" value="30.0" type="string"/>
        <att name="NODE_CUSTOMGRAPHICS_POSITION_8" value="C,C,c,0.00,0.00" type="string"/>
        <att name="NODE_CUSTOMGRAPHICS_POSITION_9" value="C,C,c,0.00,0.00" type="string"/>
        <att name="NODE_CUSTOMGRAPHICS_POSITION_1" value="C,C,c,0.00,0.00" type="string"/>
        <att name="NODE_BORDER_TRANSPARENCY" value="255" type="string"/>
        <att name="NODE_CUSTOMGRAPHICS_SIZE_3" value="0.0" type="string"/>
        <att name="NODE_CUSTOMGRAPHICS_3" value="org.cytoscape.ding.customgraphics.NullCustomGraphics,0,[ Remove Graphics ]," type="string"/>
        <att name="NODE_CUSTOMGRAPHICS_7" value="org.cytoscape.ding.customgraphics.NullCustomGraphics,0,[ Remove Graphics ]," type="string"/>
        <att name="NODE_CUSTOMGRAPHICS_SIZE_7" value="0.0" type="string"/>
        <att name="NODE_CUSTOMGRAPHICS_SIZE_8" value="0.0" type="string"/>
        <att name="NODE_CUSTOMGRAPHICS_POSITION_5" value="C,C,c,0.00,0.00" type="string"/>
        <att name="NODE_SHAPE" value="ROUND_RECTANGLE" type="string"/>
        <att name="NODE_SELECTED" value="false" type="string"/>
        <att name="NODE_DEPTH" value="0.0" type="string"/>
        <att name="NODE_CUSTOMGRAPHICS_SIZE_5" value="0.0" type="string"/>
        <att name="NODE_FILL_COLOR" value="#C8C8C8" type="string"/>
        <att name="NODE_VISIBLE" value="true" type="string"/>
        <att name="NODE_BORDER_WIDTH" value="0.0" type="string"/>
        <att name="NODE_TOOLTIP" value="" type="string"/>
        <att name="NODE_BORDER_PAINT" value="#006699" type="string"/>
        <att name="NODE_CUSTOMGRAPHICS_6" value="org.cytoscape.ding.customgraphics.NullCustomGraphics,0,[ Remove Graphics ]," type="string"/>
        <att name="NODE_WIDTH" value="80.0" type="string"/>
        <att name="NODE_CUSTOMGRAPHICS_POSITION_3" value="C,C,c,0.00,0.00" type="string"/>
        <att name="NODE_CUSTOMGRAPHICS_4" value="org.cytoscape.ding.customgraphics.NullCustomGraphics,0,[ Remove Graphics ]," type="string"/>
        <att name="NODE_LABEL_POSITION" value="C,C,c,0.00,0.00" type="string"/>
        <att name="NODE_LABEL_TRANSPARENCY" value="255" type="string"/>
        <att name="NODE_CUSTOMGRAPHICS_SIZE_4" value="0.0" type="string"/>
        <att name="NODE_CUSTOMGRAPHICS_2" value="org.cytoscape.ding.customgraphics.NullCustomGraphics,0,[ Remove Graphics ]," type="string"/>
        <att name="NODE_CUSTOMGRAPHICS_POSITION_4" value="C,C,c,0.00,0.00" type="string"/>
        <att name="NODE_LABEL_FONT_FACE" value="Dialog.plain,plain,18" type="string"/>
        <att name="NODE_CUSTOMGRAPHICS_SIZE_9" value="0.0" type="string"/>
        <att name="NODE_LABEL_COLOR" value="#000000" type="string"/>
        <att name="NODE_LABEL_FONT_SIZE" value="18" type="string"/>
        <att name="NODE_LABEL" value="HPRT1" type="string"/>
      </att>
    </graphics>
  </node>
  <node id="2782" label="TROAP" cy:nodeId="2100">
    <graphics y="-974.4504753531583" z="0.0" x="1104.1300551530585">
      <att name="lockedVisualProperties" type="list">
        <att name="NODE_NESTED_NETWORK_IMAGE_VISIBLE" value="true" type="string"/>
        <att name="NODE_CUSTOMGRAPHICS_SIZE_2" value="0.0" type="string"/>
        <att name="NODE_CUSTOMGRAPHICS_SIZE_6" value="0.0" type="string"/>
        <att name="NODE_BORDER_STROKE" value="SOLID" type="string"/>
        <att name="NODE_CUSTOMGRAPHICS_POSITION_7" value="C,C,c,0.00,0.00" type="string"/>
        <att name="NODE_CUSTOMGRAPHICS_8" value="org.cytoscape.ding.customgraphics.NullCustomGraphics,0,[ Remove Graphics ]," type="string"/>
        <att name="NODE_TRANSPARENCY" value="255" type="string"/>
        <att name="NODE_LABEL_WIDTH" value="200.0" type="string"/>
        <att name="NODE_CUSTOMGRAPHICS_SIZE_1" value="0.0" type="string"/>
        <att name="NODE_CUSTOMGRAPHICS_5" value="org.cytoscape.ding.customgraphics.NullCustomGraphics,0,[ Remove Graphics ]," type="string"/>
        <att name="NODE_CUSTOMGRAPHICS_9" value="org.cytoscape.ding.customgraphics.NullCustomGraphics,0,[ Remove Graphics ]," type="string"/>
        <att name="NODE_CUSTOMGRAPHICS_1" value="org.cytoscape.ding.customgraphics.NullCustomGraphics,0,[ Remove Graphics ]," type="string"/>
        <att name="NODE_CUSTOMGRAPHICS_POSITION_6" value="C,C,c,0.00,0.00" type="string"/>
        <att name="NODE_CUSTOMGRAPHICS_POSITION_2" value="C,C,c,0.00,0.00" type="string"/>
        <att name="NODE_SELECTED_PAINT" value="#FFFF00" type="string"/>
        <att name="NODE_HEIGHT" value="30.0" type="string"/>
        <att name="NODE_CUSTOMGRAPHICS_POSITION_8" value="C,C,c,0.00,0.00" type="string"/>
        <att name="NODE_CUSTOMGRAPHICS_POSITION_9" value="C,C,c,0.00,0.00" type="string"/>
        <att name="NODE_CUSTOMGRAPHICS_POSITION_1" value="C,C,c,0.00,0.00" type="string"/>
        <att name="NODE_BORDER_TRANSPARENCY" value="255" type="string"/>
        <att name="NODE_CUSTOMGRAPHICS_SIZE_3" value="0.0" type="string"/>
        <att name="NODE_CUSTOMGRAPHICS_3" value="org.cytoscape.ding.customgraphics.NullCustomGraphics,0,[ Remove Graphics ]," type="string"/>
        <att name="NODE_CUSTOMGRAPHICS_7" value="org.cytoscape.ding.customgraphics.NullCustomGraphics,0,[ Remove Graphics ]," type="string"/>
        <att name="NODE_CUSTOMGRAPHICS_SIZE_7" value="0.0" type="string"/>
        <att name="NODE_CUSTOMGRAPHICS_SIZE_8" value="0.0" type="string"/>
        <att name="NODE_CUSTOMGRAPHICS_POSITION_5" value="C,C,c,0.00,0.00" type="string"/>
        <att name="NODE_SHAPE" value="ROUND_RECTANGLE" type="string"/>
        <att name="NODE_SELECTED" value="false" type="string"/>
        <att name="NODE_DEPTH" value="0.0" type="string"/>
        <att name="NODE_CUSTOMGRAPHICS_SIZE_5" value="0.0" type="string"/>
        <att name="NODE_FILL_COLOR" value="#C8C8C8" type="string"/>
        <att name="NODE_VISIBLE" value="true" type="string"/>
        <att name="NODE_BORDER_WIDTH" value="0.0" type="string"/>
        <att name="NODE_TOOLTIP" value="" type="string"/>
        <att name="NODE_BORDER_PAINT" value="#006699" type="string"/>
        <att name="NODE_CUSTOMGRAPHICS_6" value="org.cytoscape.ding.customgraphics.NullCustomGraphics,0,[ Remove Graphics ]," type="string"/>
        <att name="NODE_WIDTH" value="80.0" type="string"/>
        <att name="NODE_CUSTOMGRAPHICS_POSITION_3" value="C,C,c,0.00,0.00" type="string"/>
        <att name="NODE_CUSTOMGRAPHICS_4" value="org.cytoscape.ding.customgraphics.NullCustomGraphics,0,[ Remove Graphics ]," type="string"/>
        <att name="NODE_LABEL_POSITION" value="C,C,c,0.00,0.00" type="string"/>
        <att name="NODE_LABEL_TRANSPARENCY" value="255" type="string"/>
        <att name="NODE_CUSTOMGRAPHICS_SIZE_4" value="0.0" type="string"/>
        <att name="NODE_CUSTOMGRAPHICS_2" value="org.cytoscape.ding.customgraphics.NullCustomGraphics,0,[ Remove Graphics ]," type="string"/>
        <att name="NODE_CUSTOMGRAPHICS_POSITION_4" value="C,C,c,0.00,0.00" type="string"/>
        <att name="NODE_LABEL_FONT_FACE" value="Dialog.plain,plain,18" type="string"/>
        <att name="NODE_CUSTOMGRAPHICS_SIZE_9" value="0.0" type="string"/>
        <att name="NODE_LABEL_COLOR" value="#000000" type="string"/>
        <att name="NODE_LABEL_FONT_SIZE" value="18" type="string"/>
        <att name="NODE_LABEL" value="TROAP" type="string"/>
      </att>
    </graphics>
  </node>
  <node id="2781" label="MOXD1" cy:nodeId="2101">
    <graphics y="-118.34292566032315" z="0.0" x="250.75913220272017">
      <att name="lockedVisualProperties" type="list">
        <att name="NODE_NESTED_NETWORK_IMAGE_VISIBLE" value="true" type="string"/>
        <att name="NODE_CUSTOMGRAPHICS_SIZE_2" value="0.0" type="string"/>
        <att name="NODE_CUSTOMGRAPHICS_SIZE_6" value="0.0" type="string"/>
        <att name="NODE_BORDER_STROKE" value="SOLID" type="string"/>
        <att name="NODE_CUSTOMGRAPHICS_POSITION_7" value="C,C,c,0.00,0.00" type="string"/>
        <att name="NODE_CUSTOMGRAPHICS_8" value="org.cytoscape.ding.customgraphics.NullCustomGraphics,0,[ Remove Graphics ]," type="string"/>
        <att name="NODE_TRANSPARENCY" value="255" type="string"/>
        <att name="NODE_LABEL_WIDTH" value="200.0" type="string"/>
        <att name="NODE_CUSTOMGRAPHICS_SIZE_1" value="0.0" type="string"/>
        <att name="NODE_CUSTOMGRAPHICS_5" value="org.cytoscape.ding.customgraphics.NullCustomGraphics,0,[ Remove Graphics ]," type="string"/>
        <att name="NODE_CUSTOMGRAPHICS_9" value="org.cytoscape.ding.customgraphics.NullCustomGraphics,0,[ Remove Graphics ]," type="string"/>
        <att name="NODE_CUSTOMGRAPHICS_1" value="org.cytoscape.ding.customgraphics.NullCustomGraphics,0,[ Remove Graphics ]," type="string"/>
        <att name="NODE_CUSTOMGRAPHICS_POSITION_6" value="C,C,c,0.00,0.00" type="string"/>
        <att name="NODE_CUSTOMGRAPHICS_POSITION_2" value="C,C,c,0.00,0.00" type="string"/>
        <att name="NODE_SELECTED_PAINT" value="#FFFF00" type="string"/>
        <att name="NODE_HEIGHT" value="30.0" type="string"/>
        <att name="NODE_CUSTOMGRAPHICS_POSITION_8" value="C,C,c,0.00,0.00" type="string"/>
        <att name="NODE_CUSTOMGRAPHICS_POSITION_9" value="C,C,c,0.00,0.00" type="string"/>
        <att name="NODE_CUSTOMGRAPHICS_POSITION_1" value="C,C,c,0.00,0.00" type="string"/>
        <att name="NODE_BORDER_TRANSPARENCY" value="255" type="string"/>
        <att name="NODE_CUSTOMGRAPHICS_SIZE_3" value="0.0" type="string"/>
        <att name="NODE_CUSTOMGRAPHICS_3" value="org.cytoscape.ding.customgraphics.NullCustomGraphics,0,[ Remove Graphics ]," type="string"/>
        <att name="NODE_CUSTOMGRAPHICS_7" value="org.cytoscape.ding.customgraphics.NullCustomGraphics,0,[ Remove Graphics ]," type="string"/>
        <att name="NODE_CUSTOMGRAPHICS_SIZE_7" value="0.0" type="string"/>
        <att name="NODE_CUSTOMGRAPHICS_SIZE_8" value="0.0" type="string"/>
        <att name="NODE_CUSTOMGRAPHICS_POSITION_5" value="C,C,c,0.00,0.00" type="string"/>
        <att name="NODE_SHAPE" value="ROUND_RECTANGLE" type="string"/>
        <att name="NODE_SELECTED" value="false" type="string"/>
        <att name="NODE_DEPTH" value="0.0" type="string"/>
        <att name="NODE_CUSTOMGRAPHICS_SIZE_5" value="0.0" type="string"/>
        <att name="NODE_FILL_COLOR" value="#C8C8C8" type="string"/>
        <att name="NODE_VISIBLE" value="true" type="string"/>
        <att name="NODE_BORDER_WIDTH" value="0.0" type="string"/>
        <att name="NODE_TOOLTIP" value="" type="string"/>
        <att name="NODE_BORDER_PAINT" value="#006699" type="string"/>
        <att name="NODE_CUSTOMGRAPHICS_6" value="org.cytoscape.ding.customgraphics.NullCustomGraphics,0,[ Remove Graphics ]," type="string"/>
        <att name="NODE_WIDTH" value="80.0" type="string"/>
        <att name="NODE_CUSTOMGRAPHICS_POSITION_3" value="C,C,c,0.00,0.00" type="string"/>
        <att name="NODE_CUSTOMGRAPHICS_4" value="org.cytoscape.ding.customgraphics.NullCustomGraphics,0,[ Remove Graphics ]," type="string"/>
        <att name="NODE_LABEL_POSITION" value="C,C,c,0.00,0.00" type="string"/>
        <att name="NODE_LABEL_TRANSPARENCY" value="255" type="string"/>
        <att name="NODE_CUSTOMGRAPHICS_SIZE_4" value="0.0" type="string"/>
        <att name="NODE_CUSTOMGRAPHICS_2" value="org.cytoscape.ding.customgraphics.NullCustomGraphics,0,[ Remove Graphics ]," type="string"/>
        <att name="NODE_CUSTOMGRAPHICS_POSITION_4" value="C,C,c,0.00,0.00" type="string"/>
        <att name="NODE_LABEL_FONT_FACE" value="Dialog.plain,plain,18" type="string"/>
        <att name="NODE_CUSTOMGRAPHICS_SIZE_9" value="0.0" type="string"/>
        <att name="NODE_LABEL_COLOR" value="#000000" type="string"/>
        <att name="NODE_LABEL_FONT_SIZE" value="18" type="string"/>
        <att name="NODE_LABEL" value="MOXD1" type="string"/>
      </att>
    </graphics>
  </node>
  <node id="2780" label="TCEB1" cy:nodeId="2102">
    <graphics y="-911.1359579210854" z="0.0" x="-851.5740966796875">
      <att name="lockedVisualProperties" type="list">
        <att name="NODE_NESTED_NETWORK_IMAGE_VISIBLE" value="true" type="string"/>
        <att name="NODE_CUSTOMGRAPHICS_SIZE_2" value="0.0" type="string"/>
        <att name="NODE_CUSTOMGRAPHICS_SIZE_6" value="0.0" type="string"/>
        <att name="NODE_BORDER_STROKE" value="SOLID" type="string"/>
        <att name="NODE_CUSTOMGRAPHICS_POSITION_7" value="C,C,c,0.00,0.00" type="string"/>
        <att name="NODE_CUSTOMGRAPHICS_8" value="org.cytoscape.ding.customgraphics.NullCustomGraphics,0,[ Remove Graphics ]," type="string"/>
        <att name="NODE_TRANSPARENCY" value="255" type="string"/>
        <att name="NODE_LABEL_WIDTH" value="200.0" type="string"/>
        <att name="NODE_CUSTOMGRAPHICS_SIZE_1" value="0.0" type="string"/>
        <att name="NODE_CUSTOMGRAPHICS_5" value="org.cytoscape.ding.customgraphics.NullCustomGraphics,0,[ Remove Graphics ]," type="string"/>
        <att name="NODE_CUSTOMGRAPHICS_9" value="org.cytoscape.ding.customgraphics.NullCustomGraphics,0,[ Remove Graphics ]," type="string"/>
        <att name="NODE_CUSTOMGRAPHICS_1" value="org.cytoscape.ding.customgraphics.NullCustomGraphics,0,[ Remove Graphics ]," type="string"/>
        <att name="NODE_CUSTOMGRAPHICS_POSITION_6" value="C,C,c,0.00,0.00" type="string"/>
        <att name="NODE_CUSTOMGRAPHICS_POSITION_2" value="C,C,c,0.00,0.00" type="string"/>
        <att name="NODE_SELECTED_PAINT" value="#FFFF00" type="string"/>
        <att name="NODE_HEIGHT" value="30.0" type="string"/>
        <att name="NODE_CUSTOMGRAPHICS_POSITION_8" value="C,C,c,0.00,0.00" type="string"/>
        <att name="NODE_CUSTOMGRAPHICS_POSITION_9" value="C,C,c,0.00,0.00" type="string"/>
        <att name="NODE_CUSTOMGRAPHICS_POSITION_1" value="C,C,c,0.00,0.00" type="string"/>
        <att name="NODE_BORDER_TRANSPARENCY" value="255" type="string"/>
        <att name="NODE_CUSTOMGRAPHICS_SIZE_3" value="0.0" type="string"/>
        <att name="NODE_CUSTOMGRAPHICS_3" value="org.cytoscape.ding.customgraphics.NullCustomGraphics,0,[ Remove Graphics ]," type="string"/>
        <att name="NODE_CUSTOMGRAPHICS_7" value="org.cytoscape.ding.customgraphics.NullCustomGraphics,0,[ Remove Graphics ]," type="string"/>
        <att name="NODE_CUSTOMGRAPHICS_SIZE_7" value="0.0" type="string"/>
        <att name="NODE_CUSTOMGRAPHICS_SIZE_8" value="0.0" type="string"/>
        <att name="NODE_CUSTOMGRAPHICS_POSITION_5" value="C,C,c,0.00,0.00" type="string"/>
        <att name="NODE_SHAPE" value="ROUND_RECTANGLE" type="string"/>
        <att name="NODE_SELECTED" value="false" type="string"/>
        <att name="NODE_DEPTH" value="0.0" type="string"/>
        <att name="NODE_CUSTOMGRAPHICS_SIZE_5" value="0.0" type="string"/>
        <att name="NODE_FILL_COLOR" value="#C8C8C8" type="string"/>
        <att name="NODE_VISIBLE" value="true" type="string"/>
        <att name="NODE_BORDER_WIDTH" value="0.0" type="string"/>
        <att name="NODE_TOOLTIP" value="" type="string"/>
        <att name="NODE_BORDER_PAINT" value="#006699" type="string"/>
        <att name="NODE_CUSTOMGRAPHICS_6" value="org.cytoscape.ding.customgraphics.NullCustomGraphics,0,[ Remove Graphics ]," type="string"/>
        <att name="NODE_WIDTH" value="80.0" type="string"/>
        <att name="NODE_CUSTOMGRAPHICS_POSITION_3" value="C,C,c,0.00,0.00" type="string"/>
        <att name="NODE_CUSTOMGRAPHICS_4" value="org.cytoscape.ding.customgraphics.NullCustomGraphics,0,[ Remove Graphics ]," type="string"/>
        <att name="NODE_LABEL_POSITION" value="C,C,c,0.00,0.00" type="string"/>
        <att name="NODE_LABEL_TRANSPARENCY" value="255" type="string"/>
        <att name="NODE_CUSTOMGRAPHICS_SIZE_4" value="0.0" type="string"/>
        <att name="NODE_CUSTOMGRAPHICS_2" value="org.cytoscape.ding.customgraphics.NullCustomGraphics,0,[ Remove Graphics ]," type="string"/>
        <att name="NODE_CUSTOMGRAPHICS_POSITION_4" value="C,C,c,0.00,0.00" type="string"/>
        <att name="NODE_LABEL_FONT_FACE" value="Dialog.plain,plain,18" type="string"/>
        <att name="NODE_CUSTOMGRAPHICS_SIZE_9" value="0.0" type="string"/>
        <att name="NODE_LABEL_COLOR" value="#000000" type="string"/>
        <att name="NODE_LABEL_FONT_SIZE" value="18" type="string"/>
        <att name="NODE_LABEL" value="TCEB1" type="string"/>
      </att>
    </graphics>
  </node>
  <node id="2779" label="MYH11" cy:nodeId="2103">
    <graphics y="-44.513320557784084" z="0.0" x="252.20661145076704">
      <att name="lockedVisualProperties" type="list">
        <att name="NODE_NESTED_NETWORK_IMAGE_VISIBLE" value="true" type="string"/>
        <att name="NODE_CUSTOMGRAPHICS_SIZE_2" value="0.0" type="string"/>
        <att name="NODE_CUSTOMGRAPHICS_SIZE_6" value="0.0" type="string"/>
        <att name="NODE_BORDER_STROKE" value="SOLID" type="string"/>
        <att name="NODE_CUSTOMGRAPHICS_POSITION_7" value="C,C,c,0.00,0.00" type="string"/>
        <att name="NODE_CUSTOMGRAPHICS_8" value="org.cytoscape.ding.customgraphics.NullCustomGraphics,0,[ Remove Graphics ]," type="string"/>
        <att name="NODE_TRANSPARENCY" value="255" type="string"/>
        <att name="NODE_LABEL_WIDTH" value="200.0" type="string"/>
        <att name="NODE_CUSTOMGRAPHICS_SIZE_1" value="0.0" type="string"/>
        <att name="NODE_CUSTOMGRAPHICS_5" value="org.cytoscape.ding.customgraphics.NullCustomGraphics,0,[ Remove Graphics ]," type="string"/>
        <att name="NODE_CUSTOMGRAPHICS_9" value="org.cytoscape.ding.customgraphics.NullCustomGraphics,0,[ Remove Graphics ]," type="string"/>
        <att name="NODE_CUSTOMGRAPHICS_1" value="org.cytoscape.ding.customgraphics.NullCustomGraphics,0,[ Remove Graphics ]," type="string"/>
        <att name="NODE_CUSTOMGRAPHICS_POSITION_6" value="C,C,c,0.00,0.00" type="string"/>
        <att name="NODE_CUSTOMGRAPHICS_POSITION_2" value="C,C,c,0.00,0.00" type="string"/>
        <att name="NODE_SELECTED_PAINT" value="#FFFF00" type="string"/>
        <att name="NODE_HEIGHT" value="30.0" type="string"/>
        <att name="NODE_CUSTOMGRAPHICS_POSITION_8" value="C,C,c,0.00,0.00" type="string"/>
        <att name="NODE_CUSTOMGRAPHICS_POSITION_9" value="C,C,c,0.00,0.00" type="string"/>
        <att name="NODE_CUSTOMGRAPHICS_POSITION_1" value="C,C,c,0.00,0.00" type="string"/>
        <att name="NODE_BORDER_TRANSPARENCY" value="255" type="string"/>
        <att name="NODE_CUSTOMGRAPHICS_SIZE_3" value="0.0" type="string"/>
        <att name="NODE_CUSTOMGRAPHICS_3" value="org.cytoscape.ding.customgraphics.NullCustomGraphics,0,[ Remove Graphics ]," type="string"/>
        <att name="NODE_CUSTOMGRAPHICS_7" value="org.cytoscape.ding.customgraphics.NullCustomGraphics,0,[ Remove Graphics ]," type="string"/>
        <att name="NODE_CUSTOMGRAPHICS_SIZE_7" value="0.0" type="string"/>
        <att name="NODE_CUSTOMGRAPHICS_SIZE_8" value="0.0" type="string"/>
        <att name="NODE_CUSTOMGRAPHICS_POSITION_5" value="C,C,c,0.00,0.00" type="string"/>
        <att name="NODE_SHAPE" value="ROUND_RECTANGLE" type="string"/>
        <att name="NODE_SELECTED" value="false" type="string"/>
        <att name="NODE_DEPTH" value="0.0" type="string"/>
        <att name="NODE_CUSTOMGRAPHICS_SIZE_5" value="0.0" type="string"/>
        <att name="NODE_FILL_COLOR" value="#C8C8C8" type="string"/>
        <att name="NODE_VISIBLE" value="true" type="string"/>
        <att name="NODE_BORDER_WIDTH" value="0.0" type="string"/>
        <att name="NODE_TOOLTIP" value="" type="string"/>
        <att name="NODE_BORDER_PAINT" value="#006699" type="string"/>
        <att name="NODE_CUSTOMGRAPHICS_6" value="org.cytoscape.ding.customgraphics.NullCustomGraphics,0,[ Remove Graphics ]," type="string"/>
        <att name="NODE_WIDTH" value="80.0" type="string"/>
        <att name="NODE_CUSTOMGRAPHICS_POSITION_3" value="C,C,c,0.00,0.00" type="string"/>
        <att name="NODE_CUSTOMGRAPHICS_4" value="org.cytoscape.ding.customgraphics.NullCustomGraphics,0,[ Remove Graphics ]," type="string"/>
        <att name="NODE_LABEL_POSITION" value="C,C,c,0.00,0.00" type="string"/>
        <att name="NODE_LABEL_TRANSPARENCY" value="255" type="string"/>
        <att name="NODE_CUSTOMGRAPHICS_SIZE_4" value="0.0" type="string"/>
        <att name="NODE_CUSTOMGRAPHICS_2" value="org.cytoscape.ding.customgraphics.NullCustomGraphics,0,[ Remove Graphics ]," type="string"/>
        <att name="NODE_CUSTOMGRAPHICS_POSITION_4" value="C,C,c,0.00,0.00" type="string"/>
        <att name="NODE_LABEL_FONT_FACE" value="Dialog.plain,plain,18" type="string"/>
        <att name="NODE_CUSTOMGRAPHICS_SIZE_9" value="0.0" type="string"/>
        <att name="NODE_LABEL_COLOR" value="#000000" type="string"/>
        <att name="NODE_LABEL_FONT_SIZE" value="18" type="string"/>
        <att name="NODE_LABEL" value="MYH11" type="string"/>
      </att>
    </graphics>
  </node>
  <node id="2778" label="CDC6" cy:nodeId="2104">
    <graphics y="-710.3788168078041" z="0.0" x="-1881.094970703125">
      <att name="lockedVisualProperties" type="list">
        <att name="NODE_NESTED_NETWORK_IMAGE_VISIBLE" value="true" type="string"/>
        <att name="NODE_CUSTOMGRAPHICS_SIZE_2" value="0.0" type="string"/>
        <att name="NODE_CUSTOMGRAPHICS_SIZE_6" value="0.0" type="string"/>
        <att name="NODE_BORDER_STROKE" value="SOLID" type="string"/>
        <att name="NODE_CUSTOMGRAPHICS_POSITION_7" value="C,C,c,0.00,0.00" type="string"/>
        <att name="NODE_CUSTOMGRAPHICS_8" value="org.cytoscape.ding.customgraphics.NullCustomGraphics,0,[ Remove Graphics ]," type="string"/>
        <att name="NODE_TRANSPARENCY" value="255" type="string"/>
        <att name="NODE_LABEL_WIDTH" value="200.0" type="string"/>
        <att name="NODE_CUSTOMGRAPHICS_SIZE_1" value="0.0" type="string"/>
        <att name="NODE_CUSTOMGRAPHICS_5" value="org.cytoscape.ding.customgraphics.NullCustomGraphics,0,[ Remove Graphics ]," type="string"/>
        <att name="NODE_CUSTOMGRAPHICS_9" value="org.cytoscape.ding.customgraphics.NullCustomGraphics,0,[ Remove Graphics ]," type="string"/>
        <att name="NODE_CUSTOMGRAPHICS_1" value="org.cytoscape.ding.customgraphics.NullCustomGraphics,0,[ Remove Graphics ]," type="string"/>
        <att name="NODE_CUSTOMGRAPHICS_POSITION_6" value="C,C,c,0.00,0.00" type="string"/>
        <att name="NODE_CUSTOMGRAPHICS_POSITION_2" value="C,C,c,0.00,0.00" type="string"/>
        <att name="NODE_SELECTED_PAINT" value="#FFFF00" type="string"/>
        <att name="NODE_HEIGHT" value="30.0" type="string"/>
        <att name="NODE_CUSTOMGRAPHICS_POSITION_8" value="C,C,c,0.00,0.00" type="string"/>
        <att name="NODE_CUSTOMGRAPHICS_POSITION_9" value="C,C,c,0.00,0.00" type="string"/>
        <att name="NODE_CUSTOMGRAPHICS_POSITION_1" value="C,C,c,0.00,0.00" type="string"/>
        <att name="NODE_BORDER_TRANSPARENCY" value="255" type="string"/>
        <att name="NODE_CUSTOMGRAPHICS_SIZE_3" value="0.0" type="string"/>
        <att name="NODE_CUSTOMGRAPHICS_3" value="org.cytoscape.ding.customgraphics.NullCustomGraphics,0,[ Remove Graphics ]," type="string"/>
        <att name="NODE_CUSTOMGRAPHICS_7" value="org.cytoscape.ding.customgraphics.NullCustomGraphics,0,[ Remove Graphics ]," type="string"/>
        <att name="NODE_CUSTOMGRAPHICS_SIZE_7" value="0.0" type="string"/>
        <att name="NODE_CUSTOMGRAPHICS_SIZE_8" value="0.0" type="string"/>
        <att name="NODE_CUSTOMGRAPHICS_POSITION_5" value="C,C,c,0.00,0.00" type="string"/>
        <att name="NODE_SHAPE" value="ROUND_RECTANGLE" type="string"/>
        <att name="NODE_SELECTED" value="false" type="string"/>
        <att name="NODE_DEPTH" value="0.0" type="string"/>
        <att name="NODE_CUSTOMGRAPHICS_SIZE_5" value="0.0" type="string"/>
        <att name="NODE_FILL_COLOR" value="#C8C8C8" type="string"/>
        <att name="NODE_VISIBLE" value="true" type="string"/>
        <att name="NODE_BORDER_WIDTH" value="0.0" type="string"/>
        <att name="NODE_TOOLTIP" value="" type="string"/>
        <att name="NODE_BORDER_PAINT" value="#006699" type="string"/>
        <att name="NODE_CUSTOMGRAPHICS_6" value="org.cytoscape.ding.customgraphics.NullCustomGraphics,0,[ Remove Graphics ]," type="string"/>
        <att name="NODE_WIDTH" value="80.0" type="string"/>
        <att name="NODE_CUSTOMGRAPHICS_POSITION_3" value="C,C,c,0.00,0.00" type="string"/>
        <att name="NODE_CUSTOMGRAPHICS_4" value="org.cytoscape.ding.customgraphics.NullCustomGraphics,0,[ Remove Graphics ]," type="string"/>
        <att name="NODE_LABEL_POSITION" value="C,C,c,0.00,0.00" type="string"/>
        <att name="NODE_LABEL_TRANSPARENCY" value="255" type="string"/>
        <att name="NODE_CUSTOMGRAPHICS_SIZE_4" value="0.0" type="string"/>
        <att name="NODE_CUSTOMGRAPHICS_2" value="org.cytoscape.ding.customgraphics.NullCustomGraphics,0,[ Remove Graphics ]," type="string"/>
        <att name="NODE_CUSTOMGRAPHICS_POSITION_4" value="C,C,c,0.00,0.00" type="string"/>
        <att name="NODE_LABEL_FONT_FACE" value="Dialog.plain,plain,18" type="string"/>
        <att name="NODE_CUSTOMGRAPHICS_SIZE_9" value="0.0" type="string"/>
        <att name="NODE_LABEL_COLOR" value="#000000" type="string"/>
        <att name="NODE_LABEL_FONT_SIZE" value="18" type="string"/>
        <att name="NODE_LABEL" value="CDC6" type="string"/>
      </att>
    </graphics>
  </node>
  <node id="2777" label="FHL1" cy:nodeId="2105">
    <graphics y="-632.0271932726479" z="0.0" x="-1694.1126708984375">
      <att name="lockedVisualProperties" type="list">
        <att name="NODE_NESTED_NETWORK_IMAGE_VISIBLE" value="true" type="string"/>
        <att name="NODE_CUSTOMGRAPHICS_SIZE_2" value="0.0" type="string"/>
        <att name="NODE_CUSTOMGRAPHICS_SIZE_6" value="0.0" type="string"/>
        <att name="NODE_BORDER_STROKE" value="SOLID" type="string"/>
        <att name="NODE_CUSTOMGRAPHICS_POSITION_7" value="C,C,c,0.00,0.00" type="string"/>
        <att name="NODE_CUSTOMGRAPHICS_8" value="org.cytoscape.ding.customgraphics.NullCustomGraphics,0,[ Remove Graphics ]," type="string"/>
        <att name="NODE_TRANSPARENCY" value="255" type="string"/>
        <att name="NODE_LABEL_WIDTH" value="200.0" type="string"/>
        <att name="NODE_CUSTOMGRAPHICS_SIZE_1" value="0.0" type="string"/>
        <att name="NODE_CUSTOMGRAPHICS_5" value="org.cytoscape.ding.customgraphics.NullCustomGraphics,0,[ Remove Graphics ]," type="string"/>
        <att name="NODE_CUSTOMGRAPHICS_9" value="org.cytoscape.ding.customgraphics.NullCustomGraphics,0,[ Remove Graphics ]," type="string"/>
        <att name="NODE_CUSTOMGRAPHICS_1" value="org.cytoscape.ding.customgraphics.NullCustomGraphics,0,[ Remove Graphics ]," type="string"/>
        <att name="NODE_CUSTOMGRAPHICS_POSITION_6" value="C,C,c,0.00,0.00" type="string"/>
        <att name="NODE_CUSTOMGRAPHICS_POSITION_2" value="C,C,c,0.00,0.00" type="string"/>
        <att name="NODE_SELECTED_PAINT" value="#FFFF00" type="string"/>
        <att name="NODE_HEIGHT" value="30.0" type="string"/>
        <att name="NODE_CUSTOMGRAPHICS_POSITION_8" value="C,C,c,0.00,0.00" type="string"/>
        <att name="NODE_CUSTOMGRAPHICS_POSITION_9" value="C,C,c,0.00,0.00" type="string"/>
        <att name="NODE_CUSTOMGRAPHICS_POSITION_1" value="C,C,c,0.00,0.00" type="string"/>
        <att name="NODE_BORDER_TRANSPARENCY" value="255" type="string"/>
        <att name="NODE_CUSTOMGRAPHICS_SIZE_3" value="0.0" type="string"/>
        <att name="NODE_CUSTOMGRAPHICS_3" value="org.cytoscape.ding.customgraphics.NullCustomGraphics,0,[ Remove Graphics ]," type="string"/>
        <att name="NODE_CUSTOMGRAPHICS_7" value="org.cytoscape.ding.customgraphics.NullCustomGraphics,0,[ Remove Graphics ]," type="string"/>
        <att name="NODE_CUSTOMGRAPHICS_SIZE_7" value="0.0" type="string"/>
        <att name="NODE_CUSTOMGRAPHICS_SIZE_8" value="0.0" type="string"/>
        <att name="NODE_CUSTOMGRAPHICS_POSITION_5" value="C,C,c,0.00,0.00" type="string"/>
        <att name="NODE_SHAPE" value="ROUND_RECTANGLE" type="string"/>
        <att name="NODE_SELECTED" value="false" type="string"/>
        <att name="NODE_DEPTH" value="0.0" type="string"/>
        <att name="NODE_CUSTOMGRAPHICS_SIZE_5" value="0.0" type="string"/>
        <att name="NODE_FILL_COLOR" value="#C8C8C8" type="string"/>
        <att name="NODE_VISIBLE" value="true" type="string"/>
        <att name="NODE_BORDER_WIDTH" value="0.0" type="string"/>
        <att name="NODE_TOOLTIP" value="" type="string"/>
        <att name="NODE_BORDER_PAINT" value="#006699" type="string"/>
        <att name="NODE_CUSTOMGRAPHICS_6" value="org.cytoscape.ding.customgraphics.NullCustomGraphics,0,[ Remove Graphics ]," type="string"/>
        <att name="NODE_WIDTH" value="80.0" type="string"/>
        <att name="NODE_CUSTOMGRAPHICS_POSITION_3" value="C,C,c,0.00,0.00" type="string"/>
        <att name="NODE_CUSTOMGRAPHICS_4" value="org.cytoscape.ding.customgraphics.NullCustomGraphics,0,[ Remove Graphics ]," type="string"/>
        <att name="NODE_LABEL_POSITION" value="C,C,c,0.00,0.00" type="string"/>
        <att name="NODE_LABEL_TRANSPARENCY" value="255" type="string"/>
        <att name="NODE_CUSTOMGRAPHICS_SIZE_4" value="0.0" type="string"/>
        <att name="NODE_CUSTOMGRAPHICS_2" value="org.cytoscape.ding.customgraphics.NullCustomGraphics,0,[ Remove Graphics ]," type="string"/>
        <att name="NODE_CUSTOMGRAPHICS_POSITION_4" value="C,C,c,0.00,0.00" type="string"/>
        <att name="NODE_LABEL_FONT_FACE" value="Dialog.plain,plain,18" type="string"/>
        <att name="NODE_CUSTOMGRAPHICS_SIZE_9" value="0.0" type="string"/>
        <att name="NODE_LABEL_COLOR" value="#000000" type="string"/>
        <att name="NODE_LABEL_FONT_SIZE" value="18" type="string"/>
        <att name="NODE_LABEL" value="FHL1" type="string"/>
      </att>
    </graphics>
  </node>
  <node id="2776" label="HSPA2" cy:nodeId="2106">
    <graphics y="-838.1591512804604" z="0.0" x="-1488.2760009765625">
      <att name="lockedVisualProperties" type="list">
        <att name="NODE_NESTED_NETWORK_IMAGE_VISIBLE" value="true" type="string"/>
        <att name="NODE_CUSTOMGRAPHICS_SIZE_2" value="0.0" type="string"/>
        <att name="NODE_CUSTOMGRAPHICS_SIZE_6" value="0.0" type="string"/>
        <att name="NODE_BORDER_STROKE" value="SOLID" type="string"/>
        <att name="NODE_CUSTOMGRAPHICS_POSITION_7" value="C,C,c,0.00,0.00" type="string"/>
        <att name="NODE_CUSTOMGRAPHICS_8" value="org.cytoscape.ding.customgraphics.NullCustomGraphics,0,[ Remove Graphics ]," type="string"/>
        <att name="NODE_TRANSPARENCY" value="255" type="string"/>
        <att name="NODE_LABEL_WIDTH" value="200.0" type="string"/>
        <att name="NODE_CUSTOMGRAPHICS_SIZE_1" value="0.0" type="string"/>
        <att name="NODE_CUSTOMGRAPHICS_5" value="org.cytoscape.ding.customgraphics.NullCustomGraphics,0,[ Remove Graphics ]," type="string"/>
        <att name="NODE_CUSTOMGRAPHICS_9" value="org.cytoscape.ding.customgraphics.NullCustomGraphics,0,[ Remove Graphics ]," type="string"/>
        <att name="NODE_CUSTOMGRAPHICS_1" value="org.cytoscape.ding.customgraphics.NullCustomGraphics,0,[ Remove Graphics ]," type="string"/>
        <att name="NODE_CUSTOMGRAPHICS_POSITION_6" value="C,C,c,0.00,0.00" type="string"/>
        <att name="NODE_CUSTOMGRAPHICS_POSITION_2" value="C,C,c,0.00,0.00" type="string"/>
        <att name="NODE_SELECTED_PAINT" value="#FFFF00" type="string"/>
        <att name="NODE_HEIGHT" value="30.0" type="string"/>
        <att name="NODE_CUSTOMGRAPHICS_POSITION_8" value="C,C,c,0.00,0.00" type="string"/>
        <att name="NODE_CUSTOMGRAPHICS_POSITION_9" value="C,C,c,0.00,0.00" type="string"/>
        <att name="NODE_CUSTOMGRAPHICS_POSITION_1" value="C,C,c,0.00,0.00" type="string"/>
        <att name="NODE_BORDER_TRANSPARENCY" value="255" type="string"/>
        <att name="NODE_CUSTOMGRAPHICS_SIZE_3" value="0.0" type="string"/>
        <att name="NODE_CUSTOMGRAPHICS_3" value="org.cytoscape.ding.customgraphics.NullCustomGraphics,0,[ Remove Graphics ]," type="string"/>
        <att name="NODE_CUSTOMGRAPHICS_7" value="org.cytoscape.ding.customgraphics.NullCustomGraphics,0,[ Remove Graphics ]," type="string"/>
        <att name="NODE_CUSTOMGRAPHICS_SIZE_7" value="0.0" type="string"/>
        <att name="NODE_CUSTOMGRAPHICS_SIZE_8" value="0.0" type="string"/>
        <att name="NODE_CUSTOMGRAPHICS_POSITION_5" value="C,C,c,0.00,0.00" type="string"/>
        <att name="NODE_SHAPE" value="ROUND_RECTANGLE" type="string"/>
        <att name="NODE_SELECTED" value="false" type="string"/>
        <att name="NODE_DEPTH" value="0.0" type="string"/>
        <att name="NODE_CUSTOMGRAPHICS_SIZE_5" value="0.0" type="string"/>
        <att name="NODE_FILL_COLOR" value="#C8C8C8" type="string"/>
        <att name="NODE_VISIBLE" value="true" type="string"/>
        <att name="NODE_BORDER_WIDTH" value="0.0" type="string"/>
        <att name="NODE_TOOLTIP" value="" type="string"/>
        <att name="NODE_BORDER_PAINT" value="#006699" type="string"/>
        <att name="NODE_CUSTOMGRAPHICS_6" value="org.cytoscape.ding.customgraphics.NullCustomGraphics,0,[ Remove Graphics ]," type="string"/>
        <att name="NODE_WIDTH" value="80.0" type="string"/>
        <att name="NODE_CUSTOMGRAPHICS_POSITION_3" value="C,C,c,0.00,0.00" type="string"/>
        <att name="NODE_CUSTOMGRAPHICS_4" value="org.cytoscape.ding.customgraphics.NullCustomGraphics,0,[ Remove Graphics ]," type="string"/>
        <att name="NODE_LABEL_POSITION" value="C,C,c,0.00,0.00" type="string"/>
        <att name="NODE_LABEL_TRANSPARENCY" value="255" type="string"/>
        <att name="NODE_CUSTOMGRAPHICS_SIZE_4" value="0.0" type="string"/>
        <att name="NODE_CUSTOMGRAPHICS_2" value="org.cytoscape.ding.customgraphics.NullCustomGraphics,0,[ Remove Graphics ]," type="string"/>
        <att name="NODE_CUSTOMGRAPHICS_POSITION_4" value="C,C,c,0.00,0.00" type="string"/>
        <att name="NODE_LABEL_FONT_FACE" value="Dialog.plain,plain,18" type="string"/>
        <att name="NODE_CUSTOMGRAPHICS_SIZE_9" value="0.0" type="string"/>
        <att name="NODE_LABEL_COLOR" value="#000000" type="string"/>
        <att name="NODE_LABEL_FONT_SIZE" value="18" type="string"/>
        <att name="NODE_LABEL" value="HSPA2" type="string"/>
      </att>
    </graphics>
  </node>
  <node id="2775" label="KIF2C" cy:nodeId="2107">
    <graphics y="303.6124118640909" z="0.0" x="159.96079235897017">
      <att name="lockedVisualProperties" type="list">
        <att name="NODE_NESTED_NETWORK_IMAGE_VISIBLE" value="true" type="string"/>
        <att name="NODE_CUSTOMGRAPHICS_SIZE_2" value="0.0" type="string"/>
        <att name="NODE_CUSTOMGRAPHICS_SIZE_6" value="0.0" type="string"/>
        <att name="NODE_BORDER_STROKE" value="SOLID" type="string"/>
        <att name="NODE_CUSTOMGRAPHICS_POSITION_7" value="C,C,c,0.00,0.00" type="string"/>
        <att name="NODE_CUSTOMGRAPHICS_8" value="org.cytoscape.ding.customgraphics.NullCustomGraphics,0,[ Remove Graphics ]," type="string"/>
        <att name="NODE_TRANSPARENCY" value="255" type="string"/>
        <att name="NODE_LABEL_WIDTH" value="200.0" type="string"/>
        <att name="NODE_CUSTOMGRAPHICS_SIZE_1" value="0.0" type="string"/>
        <att name="NODE_CUSTOMGRAPHICS_5" value="org.cytoscape.ding.customgraphics.NullCustomGraphics,0,[ Remove Graphics ]," type="string"/>
        <att name="NODE_CUSTOMGRAPHICS_9" value="org.cytoscape.ding.customgraphics.NullCustomGraphics,0,[ Remove Graphics ]," type="string"/>
        <att name="NODE_CUSTOMGRAPHICS_1" value="org.cytoscape.ding.customgraphics.NullCustomGraphics,0,[ Remove Graphics ]," type="string"/>
        <att name="NODE_CUSTOMGRAPHICS_POSITION_6" value="C,C,c,0.00,0.00" type="string"/>
        <att name="NODE_CUSTOMGRAPHICS_POSITION_2" value="C,C,c,0.00,0.00" type="string"/>
        <att name="NODE_SELECTED_PAINT" value="#FFFF00" type="string"/>
        <att name="NODE_HEIGHT" value="30.0" type="string"/>
        <att name="NODE_CUSTOMGRAPHICS_POSITION_8" value="C,C,c,0.00,0.00" type="string"/>
        <att name="NODE_CUSTOMGRAPHICS_POSITION_9" value="C,C,c,0.00,0.00" type="string"/>
        <att name="NODE_CUSTOMGRAPHICS_POSITION_1" value="C,C,c,0.00,0.00" type="string"/>
        <att name="NODE_BORDER_TRANSPARENCY" value="255" type="string"/>
        <att name="NODE_CUSTOMGRAPHICS_SIZE_3" value="0.0" type="string"/>
        <att name="NODE_CUSTOMGRAPHICS_3" value="org.cytoscape.ding.customgraphics.NullCustomGraphics,0,[ Remove Graphics ]," type="string"/>
        <att name="NODE_CUSTOMGRAPHICS_7" value="org.cytoscape.ding.customgraphics.NullCustomGraphics,0,[ Remove Graphics ]," type="string"/>
        <att name="NODE_CUSTOMGRAPHICS_SIZE_7" value="0.0" type="string"/>
        <att name="NODE_CUSTOMGRAPHICS_SIZE_8" value="0.0" type="string"/>
        <att name="NODE_CUSTOMGRAPHICS_POSITION_5" value="C,C,c,0.00,0.00" type="string"/>
        <att name="NODE_SHAPE" value="ROUND_RECTANGLE" type="string"/>
        <att name="NODE_SELECTED" value="false" type="string"/>
        <att name="NODE_DEPTH" value="0.0" type="string"/>
        <att name="NODE_CUSTOMGRAPHICS_SIZE_5" value="0.0" type="string"/>
        <att name="NODE_FILL_COLOR" value="#C8C8C8" type="string"/>
        <att name="NODE_VISIBLE" value="true" type="string"/>
        <att name="NODE_BORDER_WIDTH" value="0.0" type="string"/>
        <att name="NODE_TOOLTIP" value="" type="string"/>
        <att name="NODE_BORDER_PAINT" value="#006699" type="string"/>
        <att name="NODE_CUSTOMGRAPHICS_6" value="org.cytoscape.ding.customgraphics.NullCustomGraphics,0,[ Remove Graphics ]," type="string"/>
        <att name="NODE_WIDTH" value="80.0" type="string"/>
        <att name="NODE_CUSTOMGRAPHICS_POSITION_3" value="C,C,c,0.00,0.00" type="string"/>
        <att name="NODE_CUSTOMGRAPHICS_4" value="org.cytoscape.ding.customgraphics.NullCustomGraphics,0,[ Remove Graphics ]," type="string"/>
        <att name="NODE_LABEL_POSITION" value="C,C,c,0.00,0.00" type="string"/>
        <att name="NODE_LABEL_TRANSPARENCY" value="255" type="string"/>
        <att name="NODE_CUSTOMGRAPHICS_SIZE_4" value="0.0" type="string"/>
        <att name="NODE_CUSTOMGRAPHICS_2" value="org.cytoscape.ding.customgraphics.NullCustomGraphics,0,[ Remove Graphics ]," type="string"/>
        <att name="NODE_CUSTOMGRAPHICS_POSITION_4" value="C,C,c,0.00,0.00" type="string"/>
        <att name="NODE_LABEL_FONT_FACE" value="Dialog.plain,plain,18" type="string"/>
        <att name="NODE_CUSTOMGRAPHICS_SIZE_9" value="0.0" type="string"/>
        <att name="NODE_LABEL_COLOR" value="#000000" type="string"/>
        <att name="NODE_LABEL_FONT_SIZE" value="18" type="string"/>
        <att name="NODE_LABEL" value="KIF2C" type="string"/>
      </att>
    </graphics>
  </node>
  <node id="2774" label="SLC7A11" cy:nodeId="2108">
    <graphics y="344.2219089344034" z="0.0" x="352.2921827398295">
      <att name="lockedVisualProperties" type="list">
        <att name="NODE_NESTED_NETWORK_IMAGE_VISIBLE" value="true" type="string"/>
        <att name="NODE_CUSTOMGRAPHICS_SIZE_2" value="0.0" type="string"/>
        <att name="NODE_CUSTOMGRAPHICS_SIZE_6" value="0.0" type="string"/>
        <att name="NODE_BORDER_STROKE" value="SOLID" type="string"/>
        <att name="NODE_CUSTOMGRAPHICS_POSITION_7" value="C,C,c,0.00,0.00" type="string"/>
        <att name="NODE_CUSTOMGRAPHICS_8" value="org.cytoscape.ding.customgraphics.NullCustomGraphics,0,[ Remove Graphics ]," type="string"/>
        <att name="NODE_TRANSPARENCY" value="255" type="string"/>
        <att name="NODE_LABEL_WIDTH" value="200.0" type="string"/>
        <att name="NODE_CUSTOMGRAPHICS_SIZE_1" value="0.0" type="string"/>
        <att name="NODE_CUSTOMGRAPHICS_5" value="org.cytoscape.ding.customgraphics.NullCustomGraphics,0,[ Remove Graphics ]," type="string"/>
        <att name="NODE_CUSTOMGRAPHICS_9" value="org.cytoscape.ding.customgraphics.NullCustomGraphics,0,[ Remove Graphics ]," type="string"/>
        <att name="NODE_CUSTOMGRAPHICS_1" value="org.cytoscape.ding.customgraphics.NullCustomGraphics,0,[ Remove Graphics ]," type="string"/>
        <att name="NODE_CUSTOMGRAPHICS_POSITION_6" value="C,C,c,0.00,0.00" type="string"/>
        <att name="NODE_CUSTOMGRAPHICS_POSITION_2" value="C,C,c,0.00,0.00" type="string"/>
        <att name="NODE_SELECTED_PAINT" value="#FFFF00" type="string"/>
        <att name="NODE_HEIGHT" value="30.0" type="string"/>
        <att name="NODE_CUSTOMGRAPHICS_POSITION_8" value="C,C,c,0.00,0.00" type="string"/>
        <att name="NODE_CUSTOMGRAPHICS_POSITION_9" value="C,C,c,0.00,0.00" type="string"/>
        <att name="NODE_CUSTOMGRAPHICS_POSITION_1" value="C,C,c,0.00,0.00" type="string"/>
        <att name="NODE_BORDER_TRANSPARENCY" value="255" type="string"/>
        <att name="NODE_CUSTOMGRAPHICS_SIZE_3" value="0.0" type="string"/>
        <att name="NODE_CUSTOMGRAPHICS_3" value="org.cytoscape.ding.customgraphics.NullCustomGraphics,0,[ Remove Graphics ]," type="string"/>
        <att name="NODE_CUSTOMGRAPHICS_7" value="org.cytoscape.ding.customgraphics.NullCustomGraphics,0,[ Remove Graphics ]," type="string"/>
        <att name="NODE_CUSTOMGRAPHICS_SIZE_7" value="0.0" type="string"/>
        <att name="NODE_CUSTOMGRAPHICS_SIZE_8" value="0.0" type="string"/>
        <att name="NODE_CUSTOMGRAPHICS_POSITION_5" value="C,C,c,0.00,0.00" type="string"/>
        <att name="NODE_SHAPE" value="ROUND_RECTANGLE" type="string"/>
        <att name="NODE_SELECTED" value="false" type="string"/>
        <att name="NODE_DEPTH" value="0.0" type="string"/>
        <att name="NODE_CUSTOMGRAPHICS_SIZE_5" value="0.0" type="string"/>
        <att name="NODE_FILL_COLOR" value="#C8C8C8" type="string"/>
        <att name="NODE_VISIBLE" value="true" type="string"/>
        <att name="NODE_BORDER_WIDTH" value="0.0" type="string"/>
        <att name="NODE_TOOLTIP" value="" type="string"/>
        <att name="NODE_BORDER_PAINT" value="#006699" type="string"/>
        <att name="NODE_CUSTOMGRAPHICS_6" value="org.cytoscape.ding.customgraphics.NullCustomGraphics,0,[ Remove Graphics ]," type="string"/>
        <att name="NODE_WIDTH" value="80.0" type="string"/>
        <att name="NODE_CUSTOMGRAPHICS_POSITION_3" value="C,C,c,0.00,0.00" type="string"/>
        <att name="NODE_CUSTOMGRAPHICS_4" value="org.cytoscape.ding.customgraphics.NullCustomGraphics,0,[ Remove Graphics ]," type="string"/>
        <att name="NODE_LABEL_POSITION" value="C,C,c,0.00,0.00" type="string"/>
        <att name="NODE_LABEL_TRANSPARENCY" value="255" type="string"/>
        <att name="NODE_CUSTOMGRAPHICS_SIZE_4" value="0.0" type="string"/>
        <att name="NODE_CUSTOMGRAPHICS_2" value="org.cytoscape.ding.customgraphics.NullCustomGraphics,0,[ Remove Graphics ]," type="string"/>
        <att name="NODE_CUSTOMGRAPHICS_POSITION_4" value="C,C,c,0.00,0.00" type="string"/>
        <att name="NODE_LABEL_FONT_FACE" value="Dialog.plain,plain,18" type="string"/>
        <att name="NODE_CUSTOMGRAPHICS_SIZE_9" value="0.0" type="string"/>
        <att name="NODE_LABEL_COLOR" value="#000000" type="string"/>
        <att name="NODE_LABEL_FONT_SIZE" value="18" type="string"/>
        <att name="NODE_LABEL" value="SLC7A11" type="string"/>
      </att>
    </graphics>
  </node>
  <node id="2773" label="OBSL1" cy:nodeId="2109">
    <graphics y="-919.4024984484291" z="0.0" x="-1230.1767578125">
      <att name="lockedVisualProperties" type="list">
        <att name="NODE_NESTED_NETWORK_IMAGE_VISIBLE" value="true" type="string"/>
        <att name="NODE_CUSTOMGRAPHICS_SIZE_2" value="0.0" type="string"/>
        <att name="NODE_CUSTOMGRAPHICS_SIZE_6" value="0.0" type="string"/>
        <att name="NODE_BORDER_STROKE" value="SOLID" type="string"/>
        <att name="NODE_CUSTOMGRAPHICS_POSITION_7" value="C,C,c,0.00,0.00" type="string"/>
        <att name="NODE_CUSTOMGRAPHICS_8" value="org.cytoscape.ding.customgraphics.NullCustomGraphics,0,[ Remove Graphics ]," type="string"/>
        <att name="NODE_TRANSPARENCY" value="255" type="string"/>
        <att name="NODE_LABEL_WIDTH" value="200.0" type="string"/>
        <att name="NODE_CUSTOMGRAPHICS_SIZE_1" value="0.0" type="string"/>
        <att name="NODE_CUSTOMGRAPHICS_5" value="org.cytoscape.ding.customgraphics.NullCustomGraphics,0,[ Remove Graphics ]," type="string"/>
        <att name="NODE_CUSTOMGRAPHICS_9" value="org.cytoscape.ding.customgraphics.NullCustomGraphics,0,[ Remove Graphics ]," type="string"/>
        <att name="NODE_CUSTOMGRAPHICS_1" value="org.cytoscape.ding.customgraphics.NullCustomGraphics,0,[ Remove Graphics ]," type="string"/>
        <att name="NODE_CUSTOMGRAPHICS_POSITION_6" value="C,C,c,0.00,0.00" type="string"/>
        <att name="NODE_CUSTOMGRAPHICS_POSITION_2" value="C,C,c,0.00,0.00" type="string"/>
        <att name="NODE_SELECTED_PAINT" value="#FFFF00" type="string"/>
        <att name="NODE_HEIGHT" value="30.0" type="string"/>
        <att name="NODE_CUSTOMGRAPHICS_POSITION_8" value="C,C,c,0.00,0.00" type="string"/>
        <att name="NODE_CUSTOMGRAPHICS_POSITION_9" value="C,C,c,0.00,0.00" type="string"/>
        <att name="NODE_CUSTOMGRAPHICS_POSITION_1" value="C,C,c,0.00,0.00" type="string"/>
        <att name="NODE_BORDER_TRANSPARENCY" value="255" type="string"/>
        <att name="NODE_CUSTOMGRAPHICS_SIZE_3" value="0.0" type="string"/>
        <att name="NODE_CUSTOMGRAPHICS_3" value="org.cytoscape.ding.customgraphics.NullCustomGraphics,0,[ Remove Graphics ]," type="string"/>
        <att name="NODE_CUSTOMGRAPHICS_7" value="org.cytoscape.ding.customgraphics.NullCustomGraphics,0,[ Remove Graphics ]," type="string"/>
        <att name="NODE_CUSTOMGRAPHICS_SIZE_7" value="0.0" type="string"/>
        <att name="NODE_CUSTOMGRAPHICS_SIZE_8" value="0.0" type="string"/>
        <att name="NODE_CUSTOMGRAPHICS_POSITION_5" value="C,C,c,0.00,0.00" type="string"/>
        <att name="NODE_SHAPE" value="ROUND_RECTANGLE" type="string"/>
        <att name="NODE_SELECTED" value="false" type="string"/>
        <att name="NODE_DEPTH" value="0.0" type="string"/>
        <att name="NODE_CUSTOMGRAPHICS_SIZE_5" value="0.0" type="string"/>
        <att name="NODE_FILL_COLOR" value="#C8C8C8" type="string"/>
        <att name="NODE_VISIBLE" value="true" type="string"/>
        <att name="NODE_BORDER_WIDTH" value="0.0" type="string"/>
        <att name="NODE_TOOLTIP" value="" type="string"/>
        <att name="NODE_BORDER_PAINT" value="#006699" type="string"/>
        <att name="NODE_CUSTOMGRAPHICS_6" value="org.cytoscape.ding.customgraphics.NullCustomGraphics,0,[ Remove Graphics ]," type="string"/>
        <att name="NODE_WIDTH" value="80.0" type="string"/>
        <att name="NODE_CUSTOMGRAPHICS_POSITION_3" value="C,C,c,0.00,0.00" type="string"/>
        <att name="NODE_CUSTOMGRAPHICS_4" value="org.cytoscape.ding.customgraphics.NullCustomGraphics,0,[ Remove Graphics ]," type="string"/>
        <att name="NODE_LABEL_POSITION" value="C,C,c,0.00,0.00" type="string"/>
        <att name="NODE_LABEL_TRANSPARENCY" value="255" type="string"/>
        <att name="NODE_CUSTOMGRAPHICS_SIZE_4" value="0.0" type="string"/>
        <att name="NODE_CUSTOMGRAPHICS_2" value="org.cytoscape.ding.customgraphics.NullCustomGraphics,0,[ Remove Graphics ]," type="string"/>
        <att name="NODE_CUSTOMGRAPHICS_POSITION_4" value="C,C,c,0.00,0.00" type="string"/>
        <att name="NODE_LABEL_FONT_FACE" value="Dialog.plain,plain,18" type="string"/>
        <att name="NODE_CUSTOMGRAPHICS_SIZE_9" value="0.0" type="string"/>
        <att name="NODE_LABEL_COLOR" value="#000000" type="string"/>
        <att name="NODE_LABEL_FONT_SIZE" value="18" type="string"/>
        <att name="NODE_LABEL" value="OBSL1" type="string"/>
      </att>
    </graphics>
  </node>
  <node id="2772" label="PFDN5" cy:nodeId="2110">
    <graphics y="-852.8559896593666" z="0.0" x="-1138.391845703125">
      <att name="lockedVisualProperties" type="list">
        <att name="NODE_NESTED_NETWORK_IMAGE_VISIBLE" value="true" type="string"/>
        <att name="NODE_CUSTOMGRAPHICS_SIZE_2" value="0.0" type="string"/>
        <att name="NODE_CUSTOMGRAPHICS_SIZE_6" value="0.0" type="string"/>
        <att name="NODE_BORDER_STROKE" value="SOLID" type="string"/>
        <att name="NODE_CUSTOMGRAPHICS_POSITION_7" value="C,C,c,0.00,0.00" type="string"/>
        <att name="NODE_CUSTOMGRAPHICS_8" value="org.cytoscape.ding.customgraphics.NullCustomGraphics,0,[ Remove Graphics ]," type="string"/>
        <att name="NODE_TRANSPARENCY" value="255" type="string"/>
        <att name="NODE_LABEL_WIDTH" value="200.0" type="string"/>
        <att name="NODE_CUSTOMGRAPHICS_SIZE_1" value="0.0" type="string"/>
        <att name="NODE_CUSTOMGRAPHICS_5" value="org.cytoscape.ding.customgraphics.NullCustomGraphics,0,[ Remove Graphics ]," type="string"/>
        <att name="NODE_CUSTOMGRAPHICS_9" value="org.cytoscape.ding.customgraphics.NullCustomGraphics,0,[ Remove Graphics ]," type="string"/>
        <att name="NODE_CUSTOMGRAPHICS_1" value="org.cytoscape.ding.customgraphics.NullCustomGraphics,0,[ Remove Graphics ]," type="string"/>
        <att name="NODE_CUSTOMGRAPHICS_POSITION_6" value="C,C,c,0.00,0.00" type="string"/>
        <att name="NODE_CUSTOMGRAPHICS_POSITION_2" value="C,C,c,0.00,0.00" type="string"/>
        <att name="NODE_SELECTED_PAINT" value="#FFFF00" type="string"/>
        <att name="NODE_HEIGHT" value="30.0" type="string"/>
        <att name="NODE_CUSTOMGRAPHICS_POSITION_8" value="C,C,c,0.00,0.00" type="string"/>
        <att name="NODE_CUSTOMGRAPHICS_POSITION_9" value="C,C,c,0.00,0.00" type="string"/>
        <att name="NODE_CUSTOMGRAPHICS_POSITION_1" value="C,C,c,0.00,0.00" type="string"/>
        <att name="NODE_BORDER_TRANSPARENCY" value="255" type="string"/>
        <att name="NODE_CUSTOMGRAPHICS_SIZE_3" value="0.0" type="string"/>
        <att name="NODE_CUSTOMGRAPHICS_3" value="org.cytoscape.ding.customgraphics.NullCustomGraphics,0,[ Remove Graphics ]," type="string"/>
        <att name="NODE_CUSTOMGRAPHICS_7" value="org.cytoscape.ding.customgraphics.NullCustomGraphics,0,[ Remove Graphics ]," type="string"/>
        <att name="NODE_CUSTOMGRAPHICS_SIZE_7" value="0.0" type="string"/>
        <att name="NODE_CUSTOMGRAPHICS_SIZE_8" value="0.0" type="string"/>
        <att name="NODE_CUSTOMGRAPHICS_POSITION_5" value="C,C,c,0.00,0.00" type="string"/>
        <att name="NODE_SHAPE" value="ROUND_RECTANGLE" type="string"/>
        <att name="NODE_SELECTED" value="false" type="string"/>
        <att name="NODE_DEPTH" value="0.0" type="string"/>
        <att name="NODE_CUSTOMGRAPHICS_SIZE_5" value="0.0" type="string"/>
        <att name="NODE_FILL_COLOR" value="#C8C8C8" type="string"/>
        <att name="NODE_VISIBLE" value="true" type="string"/>
        <att name="NODE_BORDER_WIDTH" value="0.0" type="string"/>
        <att name="NODE_TOOLTIP" value="" type="string"/>
        <att name="NODE_BORDER_PAINT" value="#006699" type="string"/>
        <att name="NODE_CUSTOMGRAPHICS_6" value="org.cytoscape.ding.customgraphics.NullCustomGraphics,0,[ Remove Graphics ]," type="string"/>
        <att name="NODE_WIDTH" value="80.0" type="string"/>
        <att name="NODE_CUSTOMGRAPHICS_POSITION_3" value="C,C,c,0.00,0.00" type="string"/>
        <att name="NODE_CUSTOMGRAPHICS_4" value="org.cytoscape.ding.customgraphics.NullCustomGraphics,0,[ Remove Graphics ]," type="string"/>
        <att name="NODE_LABEL_POSITION" value="C,C,c,0.00,0.00" type="string"/>
        <att name="NODE_LABEL_TRANSPARENCY" value="255" type="string"/>
        <att name="NODE_CUSTOMGRAPHICS_SIZE_4" value="0.0" type="string"/>
        <att name="NODE_CUSTOMGRAPHICS_2" value="org.cytoscape.ding.customgraphics.NullCustomGraphics,0,[ Remove Graphics ]," type="string"/>
        <att name="NODE_CUSTOMGRAPHICS_POSITION_4" value="C,C,c,0.00,0.00" type="string"/>
        <att name="NODE_LABEL_FONT_FACE" value="Dialog.plain,plain,18" type="string"/>
        <att name="NODE_CUSTOMGRAPHICS_SIZE_9" value="0.0" type="string"/>
        <att name="NODE_LABEL_COLOR" value="#000000" type="string"/>
        <att name="NODE_LABEL_FONT_SIZE" value="18" type="string"/>
        <att name="NODE_LABEL" value="PFDN5" type="string"/>
      </att>
    </graphics>
  </node>
  <node id="2771" label="NCAPG2" cy:nodeId="2111">
    <graphics y="-809.5611898546791" z="0.0" x="-1327.6912841796875">
      <att name="lockedVisualProperties" type="list">
        <att name="NODE_NESTED_NETWORK_IMAGE_VISIBLE" value="true" type="string"/>
        <att name="NODE_CUSTOMGRAPHICS_SIZE_2" value="0.0" type="string"/>
        <att name="NODE_CUSTOMGRAPHICS_SIZE_6" value="0.0" type="string"/>
        <att name="NODE_BORDER_STROKE" value="SOLID" type="string"/>
        <att name="NODE_CUSTOMGRAPHICS_POSITION_7" value="C,C,c,0.00,0.00" type="string"/>
        <att name="NODE_CUSTOMGRAPHICS_8" value="org.cytoscape.ding.customgraphics.NullCustomGraphics,0,[ Remove Graphics ]," type="string"/>
        <att name="NODE_TRANSPARENCY" value="255" type="string"/>
        <att name="NODE_LABEL_WIDTH" value="200.0" type="string"/>
        <att name="NODE_CUSTOMGRAPHICS_SIZE_1" value="0.0" type="string"/>
        <att name="NODE_CUSTOMGRAPHICS_5" value="org.cytoscape.ding.customgraphics.NullCustomGraphics,0,[ Remove Graphics ]," type="string"/>
        <att name="NODE_CUSTOMGRAPHICS_9" value="org.cytoscape.ding.customgraphics.NullCustomGraphics,0,[ Remove Graphics ]," type="string"/>
        <att name="NODE_CUSTOMGRAPHICS_1" value="org.cytoscape.ding.customgraphics.NullCustomGraphics,0,[ Remove Graphics ]," type="string"/>
        <att name="NODE_CUSTOMGRAPHICS_POSITION_6" value="C,C,c,0.00,0.00" type="string"/>
        <att name="NODE_CUSTOMGRAPHICS_POSITION_2" value="C,C,c,0.00,0.00" type="string"/>
        <att name="NODE_SELECTED_PAINT" value="#FFFF00" type="string"/>
        <att name="NODE_HEIGHT" value="30.0" type="string"/>
        <att name="NODE_CUSTOMGRAPHICS_POSITION_8" value="C,C,c,0.00,0.00" type="string"/>
        <att name="NODE_CUSTOMGRAPHICS_POSITION_9" value="C,C,c,0.00,0.00" type="string"/>
        <att name="NODE_CUSTOMGRAPHICS_POSITION_1" value="C,C,c,0.00,0.00" type="string"/>
        <att name="NODE_BORDER_TRANSPARENCY" value="255" type="string"/>
        <att name="NODE_CUSTOMGRAPHICS_SIZE_3" value="0.0" type="string"/>
        <att name="NODE_CUSTOMGRAPHICS_3" value="org.cytoscape.ding.customgraphics.NullCustomGraphics,0,[ Remove Graphics ]," type="string"/>
        <att name="NODE_CUSTOMGRAPHICS_7" value="org.cytoscape.ding.customgraphics.NullCustomGraphics,0,[ Remove Graphics ]," type="string"/>
        <att name="NODE_CUSTOMGRAPHICS_SIZE_7" value="0.0" type="string"/>
        <att name="NODE_CUSTOMGRAPHICS_SIZE_8" value="0.0" type="string"/>
        <att name="NODE_CUSTOMGRAPHICS_POSITION_5" value="C,C,c,0.00,0.00" type="string"/>
        <att name="NODE_SHAPE" value="ROUND_RECTANGLE" type="string"/>
        <att name="NODE_SELECTED" value="false" type="string"/>
        <att name="NODE_DEPTH" value="0.0" type="string"/>
        <att name="NODE_CUSTOMGRAPHICS_SIZE_5" value="0.0" type="string"/>
        <att name="NODE_FILL_COLOR" value="#C8C8C8" type="string"/>
        <att name="NODE_VISIBLE" value="true" type="string"/>
        <att name="NODE_BORDER_WIDTH" value="0.0" type="string"/>
        <att name="NODE_TOOLTIP" value="" type="string"/>
        <att name="NODE_BORDER_PAINT" value="#006699" type="string"/>
        <att name="NODE_CUSTOMGRAPHICS_6" value="org.cytoscape.ding.customgraphics.NullCustomGraphics,0,[ Remove Graphics ]," type="string"/>
        <att name="NODE_WIDTH" value="80.0" type="string"/>
        <att name="NODE_CUSTOMGRAPHICS_POSITION_3" value="C,C,c,0.00,0.00" type="string"/>
        <att name="NODE_CUSTOMGRAPHICS_4" value="org.cytoscape.ding.customgraphics.NullCustomGraphics,0,[ Remove Graphics ]," type="string"/>
        <att name="NODE_LABEL_POSITION" value="C,C,c,0.00,0.00" type="string"/>
        <att name="NODE_LABEL_TRANSPARENCY" value="255" type="string"/>
        <att name="NODE_CUSTOMGRAPHICS_SIZE_4" value="0.0" type="string"/>
        <att name="NODE_CUSTOMGRAPHICS_2" value="org.cytoscape.ding.customgraphics.NullCustomGraphics,0,[ Remove Graphics ]," type="string"/>
        <att name="NODE_CUSTOMGRAPHICS_POSITION_4" value="C,C,c,0.00,0.00" type="string"/>
        <att name="NODE_LABEL_FONT_FACE" value="Dialog.plain,plain,18" type="string"/>
        <att name="NODE_CUSTOMGRAPHICS_SIZE_9" value="0.0" type="string"/>
        <att name="NODE_LABEL_COLOR" value="#000000" type="string"/>
        <att name="NODE_LABEL_FONT_SIZE" value="18" type="string"/>
        <att name="NODE_LABEL" value="NCAPG2" type="string"/>
      </att>
    </graphics>
  </node>
  <node id="2770" label="CCDC138" cy:nodeId="2112">
    <graphics y="70.6748584583292" z="0.0" x="65.33757763729048">
      <att name="lockedVisualProperties" type="list">
        <att name="NODE_NESTED_NETWORK_IMAGE_VISIBLE" value="true" type="string"/>
        <att name="NODE_CUSTOMGRAPHICS_SIZE_2" value="0.0" type="string"/>
        <att name="NODE_CUSTOMGRAPHICS_SIZE_6" value="0.0" type="string"/>
        <att name="NODE_BORDER_STROKE" value="SOLID" type="string"/>
        <att name="NODE_CUSTOMGRAPHICS_POSITION_7" value="C,C,c,0.00,0.00" type="string"/>
        <att name="NODE_CUSTOMGRAPHICS_8" value="org.cytoscape.ding.customgraphics.NullCustomGraphics,0,[ Remove Graphics ]," type="string"/>
        <att name="NODE_TRANSPARENCY" value="255" type="string"/>
        <att name="NODE_LABEL_WIDTH" value="200.0" type="string"/>
        <att name="NODE_CUSTOMGRAPHICS_SIZE_1" value="0.0" type="string"/>
        <att name="NODE_CUSTOMGRAPHICS_5" value="org.cytoscape.ding.customgraphics.NullCustomGraphics,0,[ Remove Graphics ]," type="string"/>
        <att name="NODE_CUSTOMGRAPHICS_9" value="org.cytoscape.ding.customgraphics.NullCustomGraphics,0,[ Remove Graphics ]," type="string"/>
        <att name="NODE_CUSTOMGRAPHICS_1" value="org.cytoscape.ding.customgraphics.NullCustomGraphics,0,[ Remove Graphics ]," type="string"/>
        <att name="NODE_CUSTOMGRAPHICS_POSITION_6" value="C,C,c,0.00,0.00" type="string"/>
        <att name="NODE_CUSTOMGRAPHICS_POSITION_2" value="C,C,c,0.00,0.00" type="string"/>
        <att name="NODE_SELECTED_PAINT" value="#FFFF00" type="string"/>
        <att name="NODE_HEIGHT" value="30.0" type="string"/>
        <att name="NODE_CUSTOMGRAPHICS_POSITION_8" value="C,C,c,0.00,0.00" type="string"/>
        <att name="NODE_CUSTOMGRAPHICS_POSITION_9" value="C,C,c,0.00,0.00" type="string"/>
        <att name="NODE_CUSTOMGRAPHICS_POSITION_1" value="C,C,c,0.00,0.00" type="string"/>
        <att name="NODE_BORDER_TRANSPARENCY" value="255" type="string"/>
        <att name="NODE_CUSTOMGRAPHICS_SIZE_3" value="0.0" type="string"/>
        <att name="NODE_CUSTOMGRAPHICS_3" value="org.cytoscape.ding.customgraphics.NullCustomGraphics,0,[ Remove Graphics ]," type="string"/>
        <att name="NODE_CUSTOMGRAPHICS_7" value="org.cytoscape.ding.customgraphics.NullCustomGraphics,0,[ Remove Graphics ]," type="string"/>
        <att name="NODE_CUSTOMGRAPHICS_SIZE_7" value="0.0" type="string"/>
        <att name="NODE_CUSTOMGRAPHICS_SIZE_8" value="0.0" type="string"/>
        <att name="NODE_CUSTOMGRAPHICS_POSITION_5" value="C,C,c,0.00,0.00" type="string"/>
        <att name="NODE_SHAPE" value="ROUND_RECTANGLE" type="string"/>
        <att name="NODE_SELECTED" value="false" type="string"/>
        <att name="NODE_DEPTH" value="0.0" type="string"/>
        <att name="NODE_CUSTOMGRAPHICS_SIZE_5" value="0.0" type="string"/>
        <att name="NODE_FILL_COLOR" value="#C8C8C8" type="string"/>
        <att name="NODE_VISIBLE" value="true" type="string"/>
        <att name="NODE_BORDER_WIDTH" value="0.0" type="string"/>
        <att name="NODE_TOOLTIP" value="" type="string"/>
        <att name="NODE_BORDER_PAINT" value="#006699" type="string"/>
        <att name="NODE_CUSTOMGRAPHICS_6" value="org.cytoscape.ding.customgraphics.NullCustomGraphics,0,[ Remove Graphics ]," type="string"/>
        <att name="NODE_WIDTH" value="80.0" type="string"/>
        <att name="NODE_CUSTOMGRAPHICS_POSITION_3" value="C,C,c,0.00,0.00" type="string"/>
        <att name="NODE_CUSTOMGRAPHICS_4" value="org.cytoscape.ding.customgraphics.NullCustomGraphics,0,[ Remove Graphics ]," type="string"/>
        <att name="NODE_LABEL_POSITION" value="C,C,c,0.00,0.00" type="string"/>
        <att name="NODE_LABEL_TRANSPARENCY" value="255" type="string"/>
        <att name="NODE_CUSTOMGRAPHICS_SIZE_4" value="0.0" type="string"/>
        <att name="NODE_CUSTOMGRAPHICS_2" value="org.cytoscape.ding.customgraphics.NullCustomGraphics,0,[ Remove Graphics ]," type="string"/>
        <att name="NODE_CUSTOMGRAPHICS_POSITION_4" value="C,C,c,0.00,0.00" type="string"/>
        <att name="NODE_LABEL_FONT_FACE" value="Dialog.plain,plain,18" type="string"/>
        <att name="NODE_CUSTOMGRAPHICS_SIZE_9" value="0.0" type="string"/>
        <att name="NODE_LABEL_COLOR" value="#000000" type="string"/>
        <att name="NODE_LABEL_FONT_SIZE" value="18" type="string"/>
        <att name="NODE_LABEL" value="CCDC138" type="string"/>
      </att>
    </graphics>
  </node>
  <node id="2769" label="IQGAP3" cy:nodeId="2113">
    <graphics y="-675.0737020617104" z="0.0" x="-1486.3629150390625">
      <att name="lockedVisualProperties" type="list">
        <att name="NODE_NESTED_NETWORK_IMAGE_VISIBLE" value="true" type="string"/>
        <att name="NODE_CUSTOMGRAPHICS_SIZE_2" value="0.0" type="string"/>
        <att name="NODE_CUSTOMGRAPHICS_SIZE_6" value="0.0" type="string"/>
        <att name="NODE_BORDER_STROKE" value="SOLID" type="string"/>
        <att name="NODE_CUSTOMGRAPHICS_POSITION_7" value="C,C,c,0.00,0.00" type="string"/>
        <att name="NODE_CUSTOMGRAPHICS_8" value="org.cytoscape.ding.customgraphics.NullCustomGraphics,0,[ Remove Graphics ]," type="string"/>
        <att name="NODE_TRANSPARENCY" value="255" type="string"/>
        <att name="NODE_LABEL_WIDTH" value="200.0" type="string"/>
        <att name="NODE_CUSTOMGRAPHICS_SIZE_1" value="0.0" type="string"/>
        <att name="NODE_CUSTOMGRAPHICS_5" value="org.cytoscape.ding.customgraphics.NullCustomGraphics,0,[ Remove Graphics ]," type="string"/>
        <att name="NODE_CUSTOMGRAPHICS_9" value="org.cytoscape.ding.customgraphics.NullCustomGraphics,0,[ Remove Graphics ]," type="string"/>
        <att name="NODE_CUSTOMGRAPHICS_1" value="org.cytoscape.ding.customgraphics.NullCustomGraphics,0,[ Remove Graphics ]," type="string"/>
        <att name="NODE_CUSTOMGRAPHICS_POSITION_6" value="C,C,c,0.00,0.00" type="string"/>
        <att name="NODE_CUSTOMGRAPHICS_POSITION_2" value="C,C,c,0.00,0.00" type="string"/>
        <att name="NODE_SELECTED_PAINT" value="#FFFF00" type="string"/>
        <att name="NODE_HEIGHT" value="30.0" type="string"/>
        <att name="NODE_CUSTOMGRAPHICS_POSITION_8" value="C,C,c,0.00,0.00" type="string"/>
        <att name="NODE_CUSTOMGRAPHICS_POSITION_9" value="C,C,c,0.00,0.00" type="string"/>
        <att name="NODE_CUSTOMGRAPHICS_POSITION_1" value="C,C,c,0.00,0.00" type="string"/>
        <att name="NODE_BORDER_TRANSPARENCY" value="255" type="string"/>
        <att name="NODE_CUSTOMGRAPHICS_SIZE_3" value="0.0" type="string"/>
        <att name="NODE_CUSTOMGRAPHICS_3" value="org.cytoscape.ding.customgraphics.NullCustomGraphics,0,[ Remove Graphics ]," type="string"/>
        <att name="NODE_CUSTOMGRAPHICS_7" value="org.cytoscape.ding.customgraphics.NullCustomGraphics,0,[ Remove Graphics ]," type="string"/>
        <att name="NODE_CUSTOMGRAPHICS_SIZE_7" value="0.0" type="string"/>
        <att name="NODE_CUSTOMGRAPHICS_SIZE_8" value="0.0" type="string"/>
        <att name="NODE_CUSTOMGRAPHICS_POSITION_5" value="C,C,c,0.00,0.00" type="string"/>
        <att name="NODE_SHAPE" value="ROUND_RECTANGLE" type="string"/>
        <att name="NODE_SELECTED" value="false" type="string"/>
        <att name="NODE_DEPTH" value="0.0" type="string"/>
        <att name="NODE_CUSTOMGRAPHICS_SIZE_5" value="0.0" type="string"/>
        <att name="NODE_FILL_COLOR" value="#C8C8C8" type="string"/>
        <att name="NODE_VISIBLE" value="true" type="string"/>
        <att name="NODE_BORDER_WIDTH" value="0.0" type="string"/>
        <att name="NODE_TOOLTIP" value="" type="string"/>
        <att name="NODE_BORDER_PAINT" value="#006699" type="string"/>
        <att name="NODE_CUSTOMGRAPHICS_6" value="org.cytoscape.ding.customgraphics.NullCustomGraphics,0,[ Remove Graphics ]," type="string"/>
        <att name="NODE_WIDTH" value="80.0" type="string"/>
        <att name="NODE_CUSTOMGRAPHICS_POSITION_3" value="C,C,c,0.00,0.00" type="string"/>
        <att name="NODE_CUSTOMGRAPHICS_4" value="org.cytoscape.ding.customgraphics.NullCustomGraphics,0,[ Remove Graphics ]," type="string"/>
        <att name="NODE_LABEL_POSITION" value="C,C,c,0.00,0.00" type="string"/>
        <att name="NODE_LABEL_TRANSPARENCY" value="255" type="string"/>
        <att name="NODE_CUSTOMGRAPHICS_SIZE_4" value="0.0" type="string"/>
        <att name="NODE_CUSTOMGRAPHICS_2" value="org.cytoscape.ding.customgraphics.NullCustomGraphics,0,[ Remove Graphics ]," type="string"/>
        <att name="NODE_CUSTOMGRAPHICS_POSITION_4" value="C,C,c,0.00,0.00" type="string"/>
        <att name="NODE_LABEL_FONT_FACE" value="Dialog.plain,plain,18" type="string"/>
        <att name="NODE_CUSTOMGRAPHICS_SIZE_9" value="0.0" type="string"/>
        <att name="NODE_LABEL_COLOR" value="#000000" type="string"/>
        <att name="NODE_LABEL_FONT_SIZE" value="18" type="string"/>
        <att name="NODE_LABEL" value="IQGAP3" type="string"/>
      </att>
    </graphics>
  </node>
  <node id="2768" label="KIF7" cy:nodeId="2114">
    <graphics y="-884.2975179796791" z="0.0" x="-1422.423828125">
      <att name="lockedVisualProperties" type="list">
        <att name="NODE_NESTED_NETWORK_IMAGE_VISIBLE" value="true" type="string"/>
        <att name="NODE_CUSTOMGRAPHICS_SIZE_2" value="0.0" type="string"/>
        <att name="NODE_CUSTOMGRAPHICS_SIZE_6" value="0.0" type="string"/>
        <att name="NODE_BORDER_STROKE" value="SOLID" type="string"/>
        <att name="NODE_CUSTOMGRAPHICS_POSITION_7" value="C,C,c,0.00,0.00" type="string"/>
        <att name="NODE_CUSTOMGRAPHICS_8" value="org.cytoscape.ding.customgraphics.NullCustomGraphics,0,[ Remove Graphics ]," type="string"/>
        <att name="NODE_TRANSPARENCY" value="255" type="string"/>
        <att name="NODE_LABEL_WIDTH" value="200.0" type="string"/>
        <att name="NODE_CUSTOMGRAPHICS_SIZE_1" value="0.0" type="string"/>
        <att name="NODE_CUSTOMGRAPHICS_5" value="org.cytoscape.ding.customgraphics.NullCustomGraphics,0,[ Remove Graphics ]," type="string"/>
        <att name="NODE_CUSTOMGRAPHICS_9" value="org.cytoscape.ding.customgraphics.NullCustomGraphics,0,[ Remove Graphics ]," type="string"/>
        <att name="NODE_CUSTOMGRAPHICS_1" value="org.cytoscape.ding.customgraphics.NullCustomGraphics,0,[ Remove Graphics ]," type="string"/>
        <att name="NODE_CUSTOMGRAPHICS_POSITION_6" value="C,C,c,0.00,0.00" type="string"/>
        <att name="NODE_CUSTOMGRAPHICS_POSITION_2" value="C,C,c,0.00,0.00" type="string"/>
        <att name="NODE_SELECTED_PAINT" value="#FFFF00" type="string"/>
        <att name="NODE_HEIGHT" value="30.0" type="string"/>
        <att name="NODE_CUSTOMGRAPHICS_POSITION_8" value="C,C,c,0.00,0.00" type="string"/>
        <att name="NODE_CUSTOMGRAPHICS_POSITION_9" value="C,C,c,0.00,0.00" type="string"/>
        <att name="NODE_CUSTOMGRAPHICS_POSITION_1" value="C,C,c,0.00,0.00" type="string"/>
        <att name="NODE_BORDER_TRANSPARENCY" value="255" type="string"/>
        <att name="NODE_CUSTOMGRAPHICS_SIZE_3" value="0.0" type="string"/>
        <att name="NODE_CUSTOMGRAPHICS_3" value="org.cytoscape.ding.customgraphics.NullCustomGraphics,0,[ Remove Graphics ]," type="string"/>
        <att name="NODE_CUSTOMGRAPHICS_7" value="org.cytoscape.ding.customgraphics.NullCustomGraphics,0,[ Remove Graphics ]," type="string"/>
        <att name="NODE_CUSTOMGRAPHICS_SIZE_7" value="0.0" type="string"/>
        <att name="NODE_CUSTOMGRAPHICS_SIZE_8" value="0.0" type="string"/>
        <att name="NODE_CUSTOMGRAPHICS_POSITION_5" value="C,C,c,0.00,0.00" type="string"/>
        <att name="NODE_SHAPE" value="ROUND_RECTANGLE" type="string"/>
        <att name="NODE_SELECTED" value="false" type="string"/>
        <att name="NODE_DEPTH" value="0.0" type="string"/>
        <att name="NODE_CUSTOMGRAPHICS_SIZE_5" value="0.0" type="string"/>
        <att name="NODE_FILL_COLOR" value="#C8C8C8" type="string"/>
        <att name="NODE_VISIBLE" value="true" type="string"/>
        <att name="NODE_BORDER_WIDTH" value="0.0" type="string"/>
        <att name="NODE_TOOLTIP" value="" type="string"/>
        <att name="NODE_BORDER_PAINT" value="#006699" type="string"/>
        <att name="NODE_CUSTOMGRAPHICS_6" value="org.cytoscape.ding.customgraphics.NullCustomGraphics,0,[ Remove Graphics ]," type="string"/>
        <att name="NODE_WIDTH" value="80.0" type="string"/>
        <att name="NODE_CUSTOMGRAPHICS_POSITION_3" value="C,C,c,0.00,0.00" type="string"/>
        <att name="NODE_CUSTOMGRAPHICS_4" value="org.cytoscape.ding.customgraphics.NullCustomGraphics,0,[ Remove Graphics ]," type="string"/>
        <att name="NODE_LABEL_POSITION" value="C,C,c,0.00,0.00" type="string"/>
        <att name="NODE_LABEL_TRANSPARENCY" value="255" type="string"/>
        <att name="NODE_CUSTOMGRAPHICS_SIZE_4" value="0.0" type="string"/>
        <att name="NODE_CUSTOMGRAPHICS_2" value="org.cytoscape.ding.customgraphics.NullCustomGraphics,0,[ Remove Graphics ]," type="string"/>
        <att name="NODE_CUSTOMGRAPHICS_POSITION_4" value="C,C,c,0.00,0.00" type="string"/>
        <att name="NODE_LABEL_FONT_FACE" value="Dialog.plain,plain,18" type="string"/>
        <att name="NODE_CUSTOMGRAPHICS_SIZE_9" value="0.0" type="string"/>
        <att name="NODE_LABEL_COLOR" value="#000000" type="string"/>
        <att name="NODE_LABEL_FONT_SIZE" value="18" type="string"/>
        <att name="NODE_LABEL" value="KIF7" type="string"/>
      </att>
    </graphics>
  </node>
  <node id="2767" label="GIGYF2" cy:nodeId="2115">
    <graphics y="-869.8428671007729" z="0.0" x="-1591.807373046875">
      <att name="lockedVisualProperties" type="list">
        <att name="NODE_NESTED_NETWORK_IMAGE_VISIBLE" value="true" type="string"/>
        <att name="NODE_CUSTOMGRAPHICS_SIZE_2" value="0.0" type="string"/>
        <att name="NODE_CUSTOMGRAPHICS_SIZE_6" value="0.0" type="string"/>
        <att name="NODE_BORDER_STROKE" value="SOLID" type="string"/>
        <att name="NODE_CUSTOMGRAPHICS_POSITION_7" value="C,C,c,0.00,0.00" type="string"/>
        <att name="NODE_CUSTOMGRAPHICS_8" value="org.cytoscape.ding.customgraphics.NullCustomGraphics,0,[ Remove Graphics ]," type="string"/>
        <att name="NODE_TRANSPARENCY" value="255" type="string"/>
        <att name="NODE_LABEL_WIDTH" value="200.0" type="string"/>
        <att name="NODE_CUSTOMGRAPHICS_SIZE_1" value="0.0" type="string"/>
        <att name="NODE_CUSTOMGRAPHICS_5" value="org.cytoscape.ding.customgraphics.NullCustomGraphics,0,[ Remove Graphics ]," type="string"/>
        <att name="NODE_CUSTOMGRAPHICS_9" value="org.cytoscape.ding.customgraphics.NullCustomGraphics,0,[ Remove Graphics ]," type="string"/>
        <att name="NODE_CUSTOMGRAPHICS_1" value="org.cytoscape.ding.customgraphics.NullCustomGraphics,0,[ Remove Graphics ]," type="string"/>
        <att name="NODE_CUSTOMGRAPHICS_POSITION_6" value="C,C,c,0.00,0.00" type="string"/>
        <att name="NODE_CUSTOMGRAPHICS_POSITION_2" value="C,C,c,0.00,0.00" type="string"/>
        <att name="NODE_SELECTED_PAINT" value="#FFFF00" type="string"/>
        <att name="NODE_HEIGHT" value="30.0" type="string"/>
        <att name="NODE_CUSTOMGRAPHICS_POSITION_8" value="C,C,c,0.00,0.00" type="string"/>
        <att name="NODE_CUSTOMGRAPHICS_POSITION_9" value="C,C,c,0.00,0.00" type="string"/>
        <att name="NODE_CUSTOMGRAPHICS_POSITION_1" value="C,C,c,0.00,0.00" type="string"/>
        <att name="NODE_BORDER_TRANSPARENCY" value="255" type="string"/>
        <att name="NODE_CUSTOMGRAPHICS_SIZE_3" value="0.0" type="string"/>
        <att name="NODE_CUSTOMGRAPHICS_3" value="org.cytoscape.ding.customgraphics.NullCustomGraphics,0,[ Remove Graphics ]," type="string"/>
        <att name="NODE_CUSTOMGRAPHICS_7" value="org.cytoscape.ding.customgraphics.NullCustomGraphics,0,[ Remove Graphics ]," type="string"/>
        <att name="NODE_CUSTOMGRAPHICS_SIZE_7" value="0.0" type="string"/>
        <att name="NODE_CUSTOMGRAPHICS_SIZE_8" value="0.0" type="string"/>
        <att name="NODE_CUSTOMGRAPHICS_POSITION_5" value="C,C,c,0.00,0.00" type="string"/>
        <att name="NODE_SHAPE" value="ROUND_RECTANGLE" type="string"/>
        <att name="NODE_SELECTED" value="false" type="string"/>
        <att name="NODE_DEPTH" value="0.0" type="string"/>
        <att name="NODE_CUSTOMGRAPHICS_SIZE_5" value="0.0" type="string"/>
        <att name="NODE_FILL_COLOR" value="#C8C8C8" type="string"/>
        <att name="NODE_VISIBLE" value="true" type="string"/>
        <att name="NODE_BORDER_WIDTH" value="0.0" type="string"/>
        <att name="NODE_TOOLTIP" value="" type="string"/>
        <att name="NODE_BORDER_PAINT" value="#006699" type="string"/>
        <att name="NODE_CUSTOMGRAPHICS_6" value="org.cytoscape.ding.customgraphics.NullCustomGraphics,0,[ Remove Graphics ]," type="string"/>
        <att name="NODE_WIDTH" value="80.0" type="string"/>
        <att name="NODE_CUSTOMGRAPHICS_POSITION_3" value="C,C,c,0.00,0.00" type="string"/>
        <att name="NODE_CUSTOMGRAPHICS_4" value="org.cytoscape.ding.customgraphics.NullCustomGraphics,0,[ Remove Graphics ]," type="string"/>
        <att name="NODE_LABEL_POSITION" value="C,C,c,0.00,0.00" type="string"/>
        <att name="NODE_LABEL_TRANSPARENCY" value="255" type="string"/>
        <att name="NODE_CUSTOMGRAPHICS_SIZE_4" value="0.0" type="string"/>
        <att name="NODE_CUSTOMGRAPHICS_2" value="org.cytoscape.ding.customgraphics.NullCustomGraphics,0,[ Remove Graphics ]," type="string"/>
        <att name="NODE_CUSTOMGRAPHICS_POSITION_4" value="C,C,c,0.00,0.00" type="string"/>
        <att name="NODE_LABEL_FONT_FACE" value="Dialog.plain,plain,18" type="string"/>
        <att name="NODE_CUSTOMGRAPHICS_SIZE_9" value="0.0" type="string"/>
        <att name="NODE_LABEL_COLOR" value="#000000" type="string"/>
        <att name="NODE_LABEL_FONT_SIZE" value="18" type="string"/>
        <att name="NODE_LABEL" value="GIGYF2" type="string"/>
      </att>
    </graphics>
  </node>
  <node id="2766" label="PICK1" cy:nodeId="2116">
    <graphics y="-814.7023031359291" z="0.0" x="-1137.3262939453125">
      <att name="lockedVisualProperties" type="list">
        <att name="NODE_NESTED_NETWORK_IMAGE_VISIBLE" value="true" type="string"/>
        <att name="NODE_CUSTOMGRAPHICS_SIZE_2" value="0.0" type="string"/>
        <att name="NODE_CUSTOMGRAPHICS_SIZE_6" value="0.0" type="string"/>
        <att name="NODE_BORDER_STROKE" value="SOLID" type="string"/>
        <att name="NODE_CUSTOMGRAPHICS_POSITION_7" value="C,C,c,0.00,0.00" type="string"/>
        <att name="NODE_CUSTOMGRAPHICS_8" value="org.cytoscape.ding.customgraphics.NullCustomGraphics,0,[ Remove Graphics ]," type="string"/>
        <att name="NODE_TRANSPARENCY" value="255" type="string"/>
        <att name="NODE_LABEL_WIDTH" value="200.0" type="string"/>
        <att name="NODE_CUSTOMGRAPHICS_SIZE_1" value="0.0" type="string"/>
        <att name="NODE_CUSTOMGRAPHICS_5" value="org.cytoscape.ding.customgraphics.NullCustomGraphics,0,[ Remove Graphics ]," type="string"/>
        <att name="NODE_CUSTOMGRAPHICS_9" value="org.cytoscape.ding.customgraphics.NullCustomGraphics,0,[ Remove Graphics ]," type="string"/>
        <att name="NODE_CUSTOMGRAPHICS_1" value="org.cytoscape.ding.customgraphics.NullCustomGraphics,0,[ Remove Graphics ]," type="string"/>
        <att name="NODE_CUSTOMGRAPHICS_POSITION_6" value="C,C,c,0.00,0.00" type="string"/>
        <att name="NODE_CUSTOMGRAPHICS_POSITION_2" value="C,C,c,0.00,0.00" type="string"/>
        <att name="NODE_SELECTED_PAINT" value="#FFFF00" type="string"/>
        <att name="NODE_HEIGHT" value="30.0" type="string"/>
        <att name="NODE_CUSTOMGRAPHICS_POSITION_8" value="C,C,c,0.00,0.00" type="string"/>
        <att name="NODE_CUSTOMGRAPHICS_POSITION_9" value="C,C,c,0.00,0.00" type="string"/>
        <att name="NODE_CUSTOMGRAPHICS_POSITION_1" value="C,C,c,0.00,0.00" type="string"/>
        <att name="NODE_BORDER_TRANSPARENCY" value="255" type="string"/>
        <att name="NODE_CUSTOMGRAPHICS_SIZE_3" value="0.0" type="string"/>
        <att name="NODE_CUSTOMGRAPHICS_3" value="org.cytoscape.ding.customgraphics.NullCustomGraphics,0,[ Remove Graphics ]," type="string"/>
        <att name="NODE_CUSTOMGRAPHICS_7" value="org.cytoscape.ding.customgraphics.NullCustomGraphics,0,[ Remove Graphics ]," type="string"/>
        <att name="NODE_CUSTOMGRAPHICS_SIZE_7" value="0.0" type="string"/>
        <att name="NODE_CUSTOMGRAPHICS_SIZE_8" value="0.0" type="string"/>
        <att name="NODE_CUSTOMGRAPHICS_POSITION_5" value="C,C,c,0.00,0.00" type="string"/>
        <att name="NODE_SHAPE" value="ROUND_RECTANGLE" type="string"/>
        <att name="NODE_SELECTED" value="false" type="string"/>
        <att name="NODE_DEPTH" value="0.0" type="string"/>
        <att name="NODE_CUSTOMGRAPHICS_SIZE_5" value="0.0" type="string"/>
        <att name="NODE_FILL_COLOR" value="#C8C8C8" type="string"/>
        <att name="NODE_VISIBLE" value="true" type="string"/>
        <att name="NODE_BORDER_WIDTH" value="0.0" type="string"/>
        <att name="NODE_TOOLTIP" value="" type="string"/>
        <att name="NODE_BORDER_PAINT" value="#006699" type="string"/>
        <att name="NODE_CUSTOMGRAPHICS_6" value="org.cytoscape.ding.customgraphics.NullCustomGraphics,0,[ Remove Graphics ]," type="string"/>
        <att name="NODE_WIDTH" value="80.0" type="string"/>
        <att name="NODE_CUSTOMGRAPHICS_POSITION_3" value="C,C,c,0.00,0.00" type="string"/>
        <att name="NODE_CUSTOMGRAPHICS_4" value="org.cytoscape.ding.customgraphics.NullCustomGraphics,0,[ Remove Graphics ]," type="string"/>
        <att name="NODE_LABEL_POSITION" value="C,C,c,0.00,0.00" type="string"/>
        <att name="NODE_LABEL_TRANSPARENCY" value="255" type="string"/>
        <att name="NODE_CUSTOMGRAPHICS_SIZE_4" value="0.0" type="string"/>
        <att name="NODE_CUSTOMGRAPHICS_2" value="org.cytoscape.ding.customgraphics.NullCustomGraphics,0,[ Remove Graphics ]," type="string"/>
        <att name="NODE_CUSTOMGRAPHICS_POSITION_4" value="C,C,c,0.00,0.00" type="string"/>
        <att name="NODE_LABEL_FONT_FACE" value="Dialog.plain,plain,18" type="string"/>
        <att name="NODE_CUSTOMGRAPHICS_SIZE_9" value="0.0" type="string"/>
        <att name="NODE_LABEL_COLOR" value="#000000" type="string"/>
        <att name="NODE_LABEL_FONT_SIZE" value="18" type="string"/>
        <att name="NODE_LABEL" value="PICK1" type="string"/>
      </att>
    </graphics>
  </node>
  <node id="2765" label="IKBKB" cy:nodeId="2117">
    <graphics y="-1136.295166015625" z="0.0" x="-230.6995653343481">
      <att name="lockedVisualProperties" type="list">
        <att name="NODE_NESTED_NETWORK_IMAGE_VISIBLE" value="true" type="string"/>
        <att name="NODE_CUSTOMGRAPHICS_SIZE_2" value="0.0" type="string"/>
        <att name="NODE_CUSTOMGRAPHICS_SIZE_6" value="0.0" type="string"/>
        <att name="NODE_BORDER_STROKE" value="SOLID" type="string"/>
        <att name="NODE_CUSTOMGRAPHICS_POSITION_7" value="C,C,c,0.00,0.00" type="string"/>
        <att name="NODE_CUSTOMGRAPHICS_8" value="org.cytoscape.ding.customgraphics.NullCustomGraphics,0,[ Remove Graphics ]," type="string"/>
        <att name="NODE_TRANSPARENCY" value="255" type="string"/>
        <att name="NODE_LABEL_WIDTH" value="200.0" type="string"/>
        <att name="NODE_CUSTOMGRAPHICS_SIZE_1" value="0.0" type="string"/>
        <att name="NODE_CUSTOMGRAPHICS_5" value="org.cytoscape.ding.customgraphics.NullCustomGraphics,0,[ Remove Graphics ]," type="string"/>
        <att name="NODE_CUSTOMGRAPHICS_9" value="org.cytoscape.ding.customgraphics.NullCustomGraphics,0,[ Remove Graphics ]," type="string"/>
        <att name="NODE_CUSTOMGRAPHICS_1" value="org.cytoscape.ding.customgraphics.NullCustomGraphics,0,[ Remove Graphics ]," type="string"/>
        <att name="NODE_CUSTOMGRAPHICS_POSITION_6" value="C,C,c,0.00,0.00" type="string"/>
        <att name="NODE_CUSTOMGRAPHICS_POSITION_2" value="C,C,c,0.00,0.00" type="string"/>
        <att name="NODE_SELECTED_PAINT" value="#FFFF00" type="string"/>
        <att name="NODE_HEIGHT" value="30.0" type="string"/>
        <att name="NODE_CUSTOMGRAPHICS_POSITION_8" value="C,C,c,0.00,0.00" type="string"/>
        <att name="NODE_CUSTOMGRAPHICS_POSITION_9" value="C,C,c,0.00,0.00" type="string"/>
        <att name="NODE_CUSTOMGRAPHICS_POSITION_1" value="C,C,c,0.00,0.00" type="string"/>
        <att name="NODE_BORDER_TRANSPARENCY" value="255" type="string"/>
        <att name="NODE_CUSTOMGRAPHICS_SIZE_3" value="0.0" type="string"/>
        <att name="NODE_CUSTOMGRAPHICS_3" value="org.cytoscape.ding.customgraphics.NullCustomGraphics,0,[ Remove Graphics ]," type="string"/>
        <att name="NODE_CUSTOMGRAPHICS_7" value="org.cytoscape.ding.customgraphics.NullCustomGraphics,0,[ Remove Graphics ]," type="string"/>
        <att name="NODE_CUSTOMGRAPHICS_SIZE_7" value="0.0" type="string"/>
        <att name="NODE_CUSTOMGRAPHICS_SIZE_8" value="0.0" type="string"/>
        <att name="NODE_CUSTOMGRAPHICS_POSITION_5" value="C,C,c,0.00,0.00" type="string"/>
        <att name="NODE_SHAPE" value="ROUND_RECTANGLE" type="string"/>
        <att name="NODE_SELECTED" value="false" type="string"/>
        <att name="NODE_DEPTH" value="0.0" type="string"/>
        <att name="NODE_CUSTOMGRAPHICS_SIZE_5" value="0.0" type="string"/>
        <att name="NODE_FILL_COLOR" value="#FF9F1C" type="string"/>
        <att name="NODE_VISIBLE" value="true" type="string"/>
        <att name="NODE_BORDER_WIDTH" value="0.0" type="string"/>
        <att name="NODE_TOOLTIP" value="" type="string"/>
        <att name="NODE_BORDER_PAINT" value="#006699" type="string"/>
        <att name="NODE_CUSTOMGRAPHICS_6" value="org.cytoscape.ding.customgraphics.NullCustomGraphics,0,[ Remove Graphics ]," type="string"/>
        <att name="NODE_WIDTH" value="80.0" type="string"/>
        <att name="NODE_CUSTOMGRAPHICS_POSITION_3" value="C,C,c,0.00,0.00" type="string"/>
        <att name="NODE_CUSTOMGRAPHICS_4" value="org.cytoscape.ding.customgraphics.NullCustomGraphics,0,[ Remove Graphics ]," type="string"/>
        <att name="NODE_LABEL_POSITION" value="C,C,c,0.00,0.00" type="string"/>
        <att name="NODE_LABEL_TRANSPARENCY" value="255" type="string"/>
        <att name="NODE_CUSTOMGRAPHICS_SIZE_4" value="0.0" type="string"/>
        <att name="NODE_CUSTOMGRAPHICS_2" value="org.cytoscape.ding.customgraphics.NullCustomGraphics,0,[ Remove Graphics ]," type="string"/>
        <att name="NODE_CUSTOMGRAPHICS_POSITION_4" value="C,C,c,0.00,0.00" type="string"/>
        <att name="NODE_LABEL_FONT_FACE" value="Dialog.plain,plain,18" type="string"/>
        <att name="NODE_CUSTOMGRAPHICS_SIZE_9" value="0.0" type="string"/>
        <att name="NODE_LABEL_COLOR" value="#000000" type="string"/>
        <att name="NODE_LABEL_FONT_SIZE" value="18" type="string"/>
        <att name="NODE_LABEL" value="IKBKB" type="string"/>
      </att>
    </graphics>
  </node>
  <node id="2764" label="CEP135" cy:nodeId="2118">
    <graphics y="-638.8233358507729" z="0.0" x="-1880.1904296875">
      <att name="lockedVisualProperties" type="list">
        <att name="NODE_NESTED_NETWORK_IMAGE_VISIBLE" value="true" type="string"/>
        <att name="NODE_CUSTOMGRAPHICS_SIZE_2" value="0.0" type="string"/>
        <att name="NODE_CUSTOMGRAPHICS_SIZE_6" value="0.0" type="string"/>
        <att name="NODE_BORDER_STROKE" value="SOLID" type="string"/>
        <att name="NODE_CUSTOMGRAPHICS_POSITION_7" value="C,C,c,0.00,0.00" type="string"/>
        <att name="NODE_CUSTOMGRAPHICS_8" value="org.cytoscape.ding.customgraphics.NullCustomGraphics,0,[ Remove Graphics ]," type="string"/>
        <att name="NODE_TRANSPARENCY" value="255" type="string"/>
        <att name="NODE_LABEL_WIDTH" value="200.0" type="string"/>
        <att name="NODE_CUSTOMGRAPHICS_SIZE_1" value="0.0" type="string"/>
        <att name="NODE_CUSTOMGRAPHICS_5" value="org.cytoscape.ding.customgraphics.NullCustomGraphics,0,[ Remove Graphics ]," type="string"/>
        <att name="NODE_CUSTOMGRAPHICS_9" value="org.cytoscape.ding.customgraphics.NullCustomGraphics,0,[ Remove Graphics ]," type="string"/>
        <att name="NODE_CUSTOMGRAPHICS_1" value="org.cytoscape.ding.customgraphics.NullCustomGraphics,0,[ Remove Graphics ]," type="string"/>
        <att name="NODE_CUSTOMGRAPHICS_POSITION_6" value="C,C,c,0.00,0.00" type="string"/>
        <att name="NODE_CUSTOMGRAPHICS_POSITION_2" value="C,C,c,0.00,0.00" type="string"/>
        <att name="NODE_SELECTED_PAINT" value="#FFFF00" type="string"/>
        <att name="NODE_HEIGHT" value="30.0" type="string"/>
        <att name="NODE_CUSTOMGRAPHICS_POSITION_8" value="C,C,c,0.00,0.00" type="string"/>
        <att name="NODE_CUSTOMGRAPHICS_POSITION_9" value="C,C,c,0.00,0.00" type="string"/>
        <att name="NODE_CUSTOMGRAPHICS_POSITION_1" value="C,C,c,0.00,0.00" type="string"/>
        <att name="NODE_BORDER_TRANSPARENCY" value="255" type="string"/>
        <att name="NODE_CUSTOMGRAPHICS_SIZE_3" value="0.0" type="string"/>
        <att name="NODE_CUSTOMGRAPHICS_3" value="org.cytoscape.ding.customgraphics.NullCustomGraphics,0,[ Remove Graphics ]," type="string"/>
        <att name="NODE_CUSTOMGRAPHICS_7" value="org.cytoscape.ding.customgraphics.NullCustomGraphics,0,[ Remove Graphics ]," type="string"/>
        <att name="NODE_CUSTOMGRAPHICS_SIZE_7" value="0.0" type="string"/>
        <att name="NODE_CUSTOMGRAPHICS_SIZE_8" value="0.0" type="string"/>
        <att name="NODE_CUSTOMGRAPHICS_POSITION_5" value="C,C,c,0.00,0.00" type="string"/>
        <att name="NODE_SHAPE" value="ROUND_RECTANGLE" type="string"/>
        <att name="NODE_SELECTED" value="false" type="string"/>
        <att name="NODE_DEPTH" value="0.0" type="string"/>
        <att name="NODE_CUSTOMGRAPHICS_SIZE_5" value="0.0" type="string"/>
        <att name="NODE_FILL_COLOR" value="#C8C8C8" type="string"/>
        <att name="NODE_VISIBLE" value="true" type="string"/>
        <att name="NODE_BORDER_WIDTH" value="0.0" type="string"/>
        <att name="NODE_TOOLTIP" value="" type="string"/>
        <att name="NODE_BORDER_PAINT" value="#006699" type="string"/>
        <att name="NODE_CUSTOMGRAPHICS_6" value="org.cytoscape.ding.customgraphics.NullCustomGraphics,0,[ Remove Graphics ]," type="string"/>
        <att name="NODE_WIDTH" value="80.0" type="string"/>
        <att name="NODE_CUSTOMGRAPHICS_POSITION_3" value="C,C,c,0.00,0.00" type="string"/>
        <att name="NODE_CUSTOMGRAPHICS_4" value="org.cytoscape.ding.customgraphics.NullCustomGraphics,0,[ Remove Graphics ]," type="string"/>
        <att name="NODE_LABEL_POSITION" value="C,C,c,0.00,0.00" type="string"/>
        <att name="NODE_LABEL_TRANSPARENCY" value="255" type="string"/>
        <att name="NODE_CUSTOMGRAPHICS_SIZE_4" value="0.0" type="string"/>
        <att name="NODE_CUSTOMGRAPHICS_2" value="org.cytoscape.ding.customgraphics.NullCustomGraphics,0,[ Remove Graphics ]," type="string"/>
        <att name="NODE_CUSTOMGRAPHICS_POSITION_4" value="C,C,c,0.00,0.00" type="string"/>
        <att name="NODE_LABEL_FONT_FACE" value="Dialog.plain,plain,18" type="string"/>
        <att name="NODE_CUSTOMGRAPHICS_SIZE_9" value="0.0" type="string"/>
        <att name="NODE_LABEL_COLOR" value="#000000" type="string"/>
        <att name="NODE_LABEL_FONT_SIZE" value="18" type="string"/>
        <att name="NODE_LABEL" value="CEP135" type="string"/>
      </att>
    </graphics>
  </node>
  <node id="2763" label="CDK4" cy:nodeId="2119">
    <graphics y="-1113.5054202669162" z="0.0" x="-624.0972290039062">
      <att name="lockedVisualProperties" type="list">
        <att name="NODE_NESTED_NETWORK_IMAGE_VISIBLE" value="true" type="string"/>
        <att name="NODE_CUSTOMGRAPHICS_SIZE_2" value="0.0" type="string"/>
        <att name="NODE_CUSTOMGRAPHICS_SIZE_6" value="0.0" type="string"/>
        <att name="NODE_BORDER_STROKE" value="SOLID" type="string"/>
        <att name="NODE_CUSTOMGRAPHICS_POSITION_7" value="C,C,c,0.00,0.00" type="string"/>
        <att name="NODE_CUSTOMGRAPHICS_8" value="org.cytoscape.ding.customgraphics.NullCustomGraphics,0,[ Remove Graphics ]," type="string"/>
        <att name="NODE_TRANSPARENCY" value="255" type="string"/>
        <att name="NODE_LABEL_WIDTH" value="200.0" type="string"/>
        <att name="NODE_CUSTOMGRAPHICS_SIZE_1" value="0.0" type="string"/>
        <att name="NODE_CUSTOMGRAPHICS_5" value="org.cytoscape.ding.customgraphics.NullCustomGraphics,0,[ Remove Graphics ]," type="string"/>
        <att name="NODE_CUSTOMGRAPHICS_9" value="org.cytoscape.ding.customgraphics.NullCustomGraphics,0,[ Remove Graphics ]," type="string"/>
        <att name="NODE_CUSTOMGRAPHICS_1" value="org.cytoscape.ding.customgraphics.NullCustomGraphics,0,[ Remove Graphics ]," type="string"/>
        <att name="NODE_CUSTOMGRAPHICS_POSITION_6" value="C,C,c,0.00,0.00" type="string"/>
        <att name="NODE_CUSTOMGRAPHICS_POSITION_2" value="C,C,c,0.00,0.00" type="string"/>
        <att name="NODE_SELECTED_PAINT" value="#FFFF00" type="string"/>
        <att name="NODE_HEIGHT" value="30.0" type="string"/>
        <att name="NODE_CUSTOMGRAPHICS_POSITION_8" value="C,C,c,0.00,0.00" type="string"/>
        <att name="NODE_CUSTOMGRAPHICS_POSITION_9" value="C,C,c,0.00,0.00" type="string"/>
        <att name="NODE_CUSTOMGRAPHICS_POSITION_1" value="C,C,c,0.00,0.00" type="string"/>
        <att name="NODE_BORDER_TRANSPARENCY" value="255" type="string"/>
        <att name="NODE_CUSTOMGRAPHICS_SIZE_3" value="0.0" type="string"/>
        <att name="NODE_CUSTOMGRAPHICS_3" value="org.cytoscape.ding.customgraphics.NullCustomGraphics,0,[ Remove Graphics ]," type="string"/>
        <att name="NODE_CUSTOMGRAPHICS_7" value="org.cytoscape.ding.customgraphics.NullCustomGraphics,0,[ Remove Graphics ]," type="string"/>
        <att name="NODE_CUSTOMGRAPHICS_SIZE_7" value="0.0" type="string"/>
        <att name="NODE_CUSTOMGRAPHICS_SIZE_8" value="0.0" type="string"/>
        <att name="NODE_CUSTOMGRAPHICS_POSITION_5" value="C,C,c,0.00,0.00" type="string"/>
        <att name="NODE_SHAPE" value="ROUND_RECTANGLE" type="string"/>
        <att name="NODE_SELECTED" value="false" type="string"/>
        <att name="NODE_DEPTH" value="0.0" type="string"/>
        <att name="NODE_CUSTOMGRAPHICS_SIZE_5" value="0.0" type="string"/>
        <att name="NODE_FILL_COLOR" value="#C8C8C8" type="string"/>
        <att name="NODE_VISIBLE" value="true" type="string"/>
        <att name="NODE_BORDER_WIDTH" value="0.0" type="string"/>
        <att name="NODE_TOOLTIP" value="" type="string"/>
        <att name="NODE_BORDER_PAINT" value="#006699" type="string"/>
        <att name="NODE_CUSTOMGRAPHICS_6" value="org.cytoscape.ding.customgraphics.NullCustomGraphics,0,[ Remove Graphics ]," type="string"/>
        <att name="NODE_WIDTH" value="80.0" type="string"/>
        <att name="NODE_CUSTOMGRAPHICS_POSITION_3" value="C,C,c,0.00,0.00" type="string"/>
[truncated: 1,952,100 more chars]
